# Supplementary material for: Interaction With Fungi Promotes the Accumulation of Specific Defense Molecules in Orchid Tubers and May Increase the Value of Tubers for Biotechnological and Medicinal Applications: The Case Study of Interaction Between Dactylorhiza sp. and Tulasnella calospora
Source: Front Plant Sci. 2022 Jun 30;13:757852. doi: 10.3389/fpls.2022.757852 (PMC9282861; doi:10.3389/fpls.2022.757852)
Supplement: Supplementary file 1 [file Data_Sheet_1.xlsx]

## Sheet: Supplementary Table S1
Supplementary Table S1. Composition of tuber-growth-promoting medium
	mg·L-1
CaCl2·2H2O	452.88
KH2PO4	270
KNO3	2530
MgSO4·7H2O	903.79
NH4NO3	700
KCl	718.67
NH4H2PO4	230.06
(NH4)2SO4	134
NaH2PO4·2H2O	172
CoCl2·6H2O	0.025
CuSO4·5H2O	0.25
MnSO4·H2O	12
FeNaEDTA	36.71
H3BO3	31
KI	0.83
Na2MoO4·2H2O	0.25
ZnSO4·7H2O	8.6
FeSO4·7H2O	27.85
Nicotinic acid	5
Pyridoxin HCl	1
Thiamine HCl	10
Methionine	1
Myoinositol	1000
Yeast extract	100
Casein hydrolysate	100
Putrescine	300
MES	500

## Sheet: Supplementary Table S2a
Supplementary Table S2. Results of proteome profiling. Supplementary table to Figure 2, 3, 6, and 7.
Tble S2a. Identified proteins and estimated protein abundances.
				Arabidopsis ortholog		T. calospora		Mock		T.calospora : mock	P-value: (nonpolar, Fungi, Sample) / (nonpolar, mock, Sample)	Correlation with dihydrophenanthrenes
Description	# PSMs	# Unique Peptides	Accession	AGI	Location (SUBAcon)	Mean	SD	Mean	SD			p(corr)	VIP
glucose-1-phosphate adenylyltransferase small subunit, chloroplastic/amyloplastic [Dendrobium catenatum]	254	19	XP_020671950.1	AT5G48300	plastid	2.23095e+06	1.65097e+06	2.61793e+06	1.86462e+06	0.852181	0.670183
ATP synthase subunit beta, mitochondrial [Phalaenopsis equestris]	513	15	XP_020598443.1	AT5G08690	mitochondrion	8.86535e+06	3.32659e+06	8.70597e+06	3.18503e+06	1.01831	0.923529
UTP--glucose-1-phosphate uridylyltransferase [Dendrobium catenatum]	339	14	XP_020674602.1	AT5G17310	extracellular	2.40529e+06	899681	3.09301e+06	1.15344e+06	0.777654	0.210692
catalase isozyme A [Dendrobium catenatum]	435	12	XP_020702876.1	AT4G35090	peroxisome	9.65603e+06	5.92068e+06	9.78077e+06	3.17022e+06	0.987246	0.957686
heat shock protein 90-5, chloroplastic [Phalaenopsis equestris]	178	12	XP_020581874.1	AT2G04030	plastid	924462	529250	960748	381254	0.962232	0.875507
heat shock 70 kDa protein, mitochondrial [Dendrobium catenatum]	152	12	XP_020677749.1	AT5G09590	mitochondrion	1.38687e+06	1.74814e+06	1.13478e+06	546686	1.22215	0.690237
V-type proton ATPase subunit B 2 [Phalaenopsis equestris]	137	12	XP_020590963.1	AT4G38510	vacuole	483519	272247	627630	249136	0.770389	0.286292
GTP-binding nuclear protein Ran1A [Phalaenopsis equestris]	89	12	XP_020584220.1	AT5G20010	cytosol	648720	208044	818765	259659	0.792315	0.174949
glucose-1-phosphate adenylyltransferase large subunit 1 [Dendrobium catenatum]	69	11	XP_020700045.1	AT4G39210	plastid	395080	411931	512768	423062	0.770484	0.583627
ruBisCO large subunit-binding protein subunit alpha [Dendrobium catenatum]	239	10	XP_020703169.1	AT2G28000	plastid	1.74938e+06	439420	1.98441e+06	1.1739e+06	0.881561	0.619564
6-phosphogluconate dehydrogenase, decarboxylating 1 [Dendrobium catenatum]	185	10	XP_028554919.1	AT3G02360	peroxisome	2.28246e+06	946152	2.21176e+06	1.25689e+06	1.03196	0.902531
proteasome subunit alpha type-7 [Dendrobium catenatum]	78	10	XP_020699998.1	AT5G66140	nucleus,cytosol	655922	161068	5.7048e+06	1.54733e+07	0.114977	0.397119
ATP synthase CF1 beta subunit (chloroplast) [Phalaenopsis equestris]	49	10	YP_006073272.1	ATCG00480	plastid	139415	88161.1	116696	168851	1.19468	0.756991
pyruvate kinase, cytosolic isozyme [Dendrobium catenatum]	94	9	XP_028555633.1	AT5G08570	cytosol	465256	160106	508380	129538	0.915174	0.559817
cell division cycle protein 48 homolog [Dendrobium catenatum]	87	9	XP_020676963.1	AT3G53230	nucleus,cytosol	257206	113015	568489	577006	0.452437	0.17565
proteasome subunit alpha type-1-A-like [Phalaenopsis equestris]	63	9	XP_020586991.1	AT5G42790	nucleus,cytosol	283693	118013	351562	109263	0.80695	0.250909
T-complex protein 1 subunit eta [Dendrobium catenatum]	55	9	XP_020685450.1	AT3G11830	cytosol	190298	76505.9	242349	106281	0.78522	0.288415
chaperonin CPN60-2, mitochondrial [Phalaenopsis equestris]	253	8	XP_020590264.1	AT3G23990	mitochondrion	1.85504e+06	600872	1.93582e+06	906557	0.958271	0.840619
proteasome subunit alpha type-5 [Dendrobium catenatum]	86	8	XP_020685547.1	AT3G14290	nucleus,cytosol	680133	200592	649768	192127	1.04673	0.762033
40S ribosomal protein S3-3 [Dendrobium catenatum]	86	8	XP_020675034.1	AT5G35530	cytosol	304199	106051	355374	110612	0.855997	0.362918
T-complex protein 1 subunit alpha [Phalaenopsis equestris]	75	8	XP_020575202.1	AT3G20050	cytosol	258224	70664.2	299270	125267	0.862847	0.446718
40S ribosomal protein S6-like [Dendrobium catenatum]	74	8	XP_020678038.1	AT4G31700	cytosol	466605	156518	411434	150660	1.13409	0.484697
betaine aldehyde dehydrogenase 1, chloroplastic [Dendrobium catenatum]	69	8	XP_020676129.1	AT1G74920	cytosol	345556	215443	441559	117069	0.782582	0.272919
60S ribosomal protein L8 [Phalaenopsis equestris]	40	8	XP_020577402.1	AT2G18020	cytosol	134588	65741.6	199189	67976.1	0.675681	0.073319
phosphoglycerate kinase, cytosolic isoform X2 [Dendrobium catenatum]	302	7	XP_020680920.1	AT1G79550	cytosol	4.2901e+06	1.76184e+06	4.805e+06	1.80226e+06	0.89284	0.574255
sucrose synthase 2 [Dendrobium catenatum]	177	7	XP_020673339.1	AT3G43190	cytosol	1.30258e+06	1.77269e+06	2.87242e+06	4.08343e+06	0.453476	0.353457
adenosylhomocysteinase isoform X1 [Dendrobium catenatum]	163	7	XP_028551582.1	AT4G13940	cytosol	1.22075e+06	415174	1.63561e+06	724013	0.746354	0.192802
beta-glucosidase 1-like [Phalaenopsis equestris]	159	7	XP_020581167.1	AT3G18080	extracellular	2.32364e+07	1.74992e+07	2.18142e+07	1.13193e+07	1.06519	0.846823
malate dehydrogenase, mitochondrial-like [Phalaenopsis equestris]	154	7	XP_020587705.1	AT1G53240	mitochondrion	3.28651e+06	1.55852e+06	2.42913e+06	1.11725e+06	1.35296	0.218853
ubiquitin-40S ribosomal protein S27a [Dendrobium catenatum]	131	7	XP_020684771.1	AT1G23410	cytosol	1.20662e+06	235011	1.04724e+06	143835	1.15219	0.114625
proteasome subunit alpha type-2-B [Dendrobium catenatum]	120	7	XP_020676537.1	AT1G79210	nucleus,cytosol	503030	150488	809329	313833	0.62154	0.0293872
V-type proton ATPase catalytic subunit A [Phalaenopsis equestris]	117	7	XP_020581168.1	AT1G78900	vacuole,golgi	304032	129169	400233	154494	0.759638	0.202237
endoplasmin homolog [Dendrobium catenatum]	115	7	XP_020685919.1	AT4G24190	endoplasmic reticulum	805662	588156	613272	354345	1.31371	0.430458
GDP-mannose 3,5-epimerase 1 [Dendrobium catenatum]	83	7	XP_020696983.1	AT5G28840	cytosol	276941	74194.3	288871	206690	0.958699	0.885311
histone H2B.7 [Dendrobium catenatum]	76	7	XP_020689197.1	AT1G07790	nucleus	1.47954e+06	541028	2.00032e+06	907425	0.739655	0.195685
prohibitin-3, mitochondrial-like [Phalaenopsis equestris]	75	7	XP_020587225.1	AT5G40770	mitochondrion	301324	124887	330310	162068	0.912247	0.699727
pyrophosphate-energized vacuolar membrane proton pump [Dendrobium catenatum]	72	7	XP_020694133.1	AT1G15690	vacuole	499723	319469	718616	191887	0.695396	0.109272	-0.696764	1.88305
succinate--CoA ligase [ADP-forming] subunit alpha, mitochondrial [Phalaenopsis equestris]	70	7	XP_020574786.1	AT5G23250	mitochondrion	165970	66410.6	339531	154609	0.48882	0.0129897
probable mitochondrial-processing peptidase subunit beta, mitochondrial [Phalaenopsis equestris]	68	7	XP_020583866.1	AT3G02090	mitochondrion	506348	164412	459516	116808	1.10192	0.515523
proteasome subunit alpha type-6 [Dendrobium catenatum]	65	7	XP_020705961.1	AT2G05840	nucleus,cytosol	266224	80745.7	344351	121132	0.77312	0.159015
CBS domain-containing protein CBSX3, mitochondrial-like [Dendrobium catenatum]	63	7	XP_028550552.1	AT5G10860	mitochondrion	424911	165296	246006	111260	1.72724	0.0202086
alpha-glucan phosphorylase, H isozyme [Phalaenopsis equestris]	55	7	XP_020576494.1	AT3G46970	cytosol	164600	97137.5	147210	70971.2	1.11813	0.684833
T-complex protein 1 subunit zeta 1 [Phalaenopsis equestris]	54	7	XP_020578454.1	AT3G02530	cytosol	232480	61791.7	303250	145661	0.766628	0.24335
protein BTR1 [Dendrobium catenatum]	46	7	XP_020682852.1	AT5G04430	nucleus	144476	65111.6	202297	27205.1	0.714179	0.0289907
60S ribosomal protein L10 [Phalaenopsis equestris]	43	7	XP_020572671.1	AT1G26910	cytosol	239502	148470	373302	104021	0.641576	0.0450455
pathogenesis-related protein 1-like [Phalaenopsis equestris]	1367	6	XP_020589611.1	AT1G24020	golgi	7.79961e+07	1.22746e+07	7.48615e+07	1.41254e+07	1.04187	0.646629
malate dehydrogenase isoform X1 [Dendrobium catenatum]	176	6	XP_020702284.1	AT5G43330	cytosol	1.92793e+06	558190	1.75188e+06	718444	1.10049	0.598928
tubulin alpha-3 chain [Dendrobium catenatum]	153	6	XP_020687421.1	AT5G19780	cytosol	1.0318e+06	513925	1.18402e+06	838476	0.871436	0.676842
Chaperonin 60 subunit beta 1, chloroplastic OS=Arabidopsis thaliana GN=CPN60B1 PE=1 SV=3	99	6	P21240	AT1G55490	plastid	367170	154320	433014	327766	0.847939	0.628218
D-3-phosphoglycerate dehydrogenase 3, chloroplastic [Dendrobium catenatum]	95	6	XP_020678598.1	AT4G34200	plastid	421746	144385	564301	181794	0.747378	0.107581
peptidyl-prolyl cis-trans isomerase CYP19-4 [Dendrobium catenatum]	93	6	XP_020682149.1	AT2G29960	endoplasmic reticulum	1.59304e+06	414004	2.03552e+06	841690	0.782621	0.217704
proteasome subunit beta type-4 [Phalaenopsis equestris]	92	6	XP_020584744.1	AT1G56450	nucleus,cytosol	441135	171158	477947	131275	0.922977	0.633014
protein IN2-1 homolog B [Dendrobium catenatum]	88	6	XP_020691332.1	AT3G55040	plastid	391086	167605	470894	239355	0.830517	0.462064
40S ribosomal protein S5-like isoform X2 [Phalaenopsis equestris]	79	6	XP_020574948.1	AT2G37270	cytosol	370021	159479	449745	164956	0.822736	0.344135
lactoylglutathione lyase [Phalaenopsis equestris]	77	6	XP_020593985.1	AT1G11840	peroxisome	1.04217e+06	658005	535115	319327	1.94757	0.0605234
60S ribosomal protein L11 [Phalaenopsis equestris]	63	6	XP_020590218.1	AT5G45775	cytosol	359965	195951	335975	117378	1.0714	0.765588
hsp70-Hsp90 organizing protein 3 [Dendrobium catenatum]	62	6	XP_020674552.1	AT1G62740	nucleus	467089	192093	478033	190340	0.977107	0.910803
40S ribosomal protein S3a [Dendrobium catenatum]	59	6	XP_020675502.1	AT3G04840	cytosol	1.08176e+06	1.38067e+06	1.41417e+06	1.58842e+06	0.764939	0.665409
60S acidic ribosomal protein P0-like [Phalaenopsis equestris]	50	6	XP_020595253.1	AT2G40010	cytosol	506668	250073	359279	167872	1.41023	0.179021	0.696481	2.4836
40S ribosomal protein S14 [Dendrobium catenatum]	49	6	XP_020686815.1	AT3G11510	cytosol	146850	46273.3	146466	65388.8	1.00263	0.989585
2-isopropylmalate synthase A-like [Phalaenopsis equestris]	48	6	XP_020592106.1	AT1G74040	plastid	119339	61542.6	128189	66557.2	0.930965	0.788174
26S protease regulatory subunit 6B homolog [Phalaenopsis equestris]	38	6	XP_020584394.1	AT5G58290	nucleus,cytosol	93223.2	49460.6	163153	83323.7	0.571385	0.0655748
40S ribosomal protein S28 [Dendrobium catenatum]	30	6	XP_020693084.1	AT5G64140	cytosol	149233	120661	185397	95239.5	0.804938	0.512413
26S proteasome non-ATPase regulatory subunit 2 homolog A-like [Dendrobium catenatum]	25	6	XP_020675170.1	AT2G20580	nucleus,cytosol	41192.4	25255.7	83414.7	23458.8	0.493827	0.00324334
enolase 2 [Dendrobium catenatum]	642	5	XP_020692467.1	AT2G36530	cytosol	1.6026e+07	6.40448e+06	1.37588e+07	4.94609e+06	1.16478	0.436074
probable glutathione S-transferase GSTF1 [Phalaenopsis equestris]	376	5	XP_020578087.1	AT3G62760	cytosol	2.73098e+07	1.04621e+07	1.80745e+07	5.25128e+06	1.51095	0.0355853	0.693936	2.64813
alcohol dehydrogenase-like [Phalaenopsis equestris]	364	5	XP_020591992.1	AT1G77120	cytosol	4.77615e+06	1.78522e+06	6.21165e+06	2.35767e+06	0.768901	0.197588
heat shock protein 81-1 [Phalaenopsis equestris]	273	5	XP_020582286.1	AT5G56010	cytosol	322480	100128	517895	144171	0.622674	0.00732054
histone H4 [Dendrobium catenatum]	202	5	XP_020693310.1	AT5G59970	nucleus	1.20435e+06	354776	1.88099e+06	1.03529e+06	0.640272	0.115095
alpha-1,4 glucan phosphorylase L isozyme, chloroplastic/amyloplastic isoform X1 [Dendrobium catenatum]	180	5	XP_020673164.2	AT3G29320	plastid	1.5248e+06	1.28383e+06	1.94135e+06	1.3216e+06	0.785431	0.53474
uncharacterized protein LOC110096380 isoform X1 [Dendrobium catenatum]	125	5	XP_028551140.1	AT5G13420	plastid	1.14333e+06	369240	1.16729e+06	254758	0.979469	0.880142
probable fructokinase-1 [Dendrobium catenatum]	103	5	XP_020676442.1	AT2G31390	cytosol	557909	207020	858112	531528	0.650158	0.174146
formate dehydrogenase 1, mitochondrial [Dendrobium catenatum]	102	5	XP_020678204.1	AT5G14780	mitochondrion	1.38767e+06	607763	1.03786e+06	359410	1.33704	0.171559
glutelin type-A 1 [Dendrobium catenatum]	92	5	XP_020690760.1	AT2G28680	vacuole	1.12287e+06	786113	1.17622e+06	336771	0.954644	0.857498
aspartate aminotransferase, cytoplasmic [Dendrobium catenatum]	89	5	XP_020695658.1	AT5G11520	peroxisome	399107	127362	389607	82585.3	1.02438	0.859381
nascent polypeptide-associated complex subunit alpha-like protein 1 [Dendrobium catenatum]	83	5	XP_020690055.1	AT3G12390	nucleus	703852	478627	478557	188452	1.47078	0.217274
40S ribosomal protein S18-like [Phalaenopsis equestris]	80	5	XP_020588921.1	AT4G09800	cytosol	794146	432605	1.02039e+06	513989	0.778274	0.362296
40S ribosomal protein S17-3-like [Dendrobium catenatum]	79	5	XP_020684321.1	AT3G10610	cytosol	375115	130035	383742	144781	0.977518	0.902952
ketol-acid reductoisomerase, chloroplastic [Dendrobium catenatum]	75	5	XP_020672422.1	AT3G58610	plastid	483721	274313	674395	325137	0.717266	0.229877
14-3-3-like protein B [Phalaenopsis equestris]	61	5	XP_020593446.1	AT2G42590	cytosol	576698	339729	777606	476143	0.741633	0.35698
ferredoxin--nitrite reductase, chloroplastic [Dendrobium catenatum]	60	5	XP_020672782.1	AT2G15620	plastid	240558	215991	252814	192275	0.951522	0.906049
cytosolic isocitrate dehydrogenase [NADP] [Phalaenopsis equestris]	58	5	XP_020575133.1	AT1G65930	cytosol	202461	96527	237531	95891.7	0.852358	0.479056
glutamate decarboxylase-like [Dendrobium catenatum]	55	5	XP_020699154.1	AT5G17330	cytosol	186574	38454.8	211677	119052	0.881409	0.596503
obg-like ATPase 1 [Dendrobium catenatum]	53	5	XP_020689967.1	AT1G30580	cytosol	399027	179187	240484	118416	1.65927	0.0498332
40S ribosomal protein S9-2-like [Dendrobium catenatum]	47	5	XP_020673233.1	AT5G39850	cytosol	380663	206453	508931	235004	0.747967	0.269268
Eukaryotic initiation factor 4A-10 OS=Nicotiana tabacum PE=2 SV=1	47	5	P41382	AT1G54270	cytosol	1.58921e+06	513568	1.83959e+06	324413	0.863893	0.25244
prohibitin-1, mitochondrial-like [Phalaenopsis equestris]	46	5	XP_020577031.1	AT4G28510	mitochondrion	201764	141088	265798	176620	0.759085	0.44298
pyruvate dehydrogenase E1 component subunit alpha-1, mitochondrial [Dendrobium catenatum]	45	5	XP_020695498.1	AT1G59900	mitochondrion	196619	92500.9	282644	85305.6	0.695641	0.0714797
sorbitol dehydrogenase [Dendrobium catenatum]	43	5	XP_020690157.2	AT5G51970	cytosol	445850	205561	322260	167245	1.38351	0.20346
Chaperonin 60 subunit alpha 1, chloroplastic OS=Arabidopsis thaliana GN=CPN60A1 PE=1 SV=2	43	5	P21238	AT2G28000	plastid	0	NA	59061.9	63718.4	0.01	2.32367e-16
chaperone protein ClpB1 [Dendrobium catenatum]	41	5	XP_020680139.1	AT1G74310	cytosol	128825	61099.2	162612	77779.7	0.792224	0.357319
cysteine synthase isoform X1 [Dendrobium catenatum]	37	5	XP_020685038.1	AT2G43750	plastid	154455	55659.8	182770	59732.5	0.845079	0.345983
ADP-ribosylation factor 2-like [Phalaenopsis equestris]	36	5	XP_020582993.1	AT5G14670	golgi	305619	390849	320301	245220	0.954163	0.928086
LOW QUALITY PROTEIN: UDP-arabinopyranose mutase 1-like [Phalaenopsis equestris]	33	5	XP_020572960.1	AT3G02230	cytosol	323048	213269	278408	130264	1.16034	0.613358
proline--tRNA ligase, cytoplasmic isoform X1 [Phalaenopsis equestris]	32	5	XP_020580474.1	AT3G62120	cytosol	115836	67237	125470	73922.1	0.923217	0.800104
acetyl-CoA carboxylase 1-like [Phalaenopsis equestris]	30	5	XP_020586628.1	AT1G36160	cytosol	205087	177300	73849.5	44476.5	2.7771	0.0495274
dihydropyrimidinase-like [Dendrobium catenatum]	27	5	XP_020671809.2	AT5G12200	endoplasmic reticulum	274884	287001	307902	135578	0.892764	0.765572
serine/threonine-protein phosphatase 2A 65 kDa regulatory subunit A beta isoform [Phalaenopsis equestris]	27	5	XP_020599017.1	AT3G25800	cytosol	132944	91467.8	204779	115637	0.649211	0.217448
UDP-glucuronic acid decarboxylase 6 [Phalaenopsis equestris]	24	5	XP_020583360.1	AT5G59290	cytosol	208727	413636	97792.7	42106.1	2.13439	0.438547
V-type proton ATPase subunit E-like [Phalaenopsis equestris]	18	5	XP_020576846.1	AT4G11150	vacuole,golgi	151924	84908.6	300873	91677.6	0.504942	0.00418495
guanosine nucleotide diphosphate dissociation inhibitor 2-like [Phalaenopsis equestris]	16	5	XP_020576872.1	AT3G59920	cytosol,extracellular	60052.2	48019	78905.6	67772.1	0.761064	0.539757
ras-related protein Rab7 [Phalaenopsis equestris]	16	5	XP_020581460.1	AT1G52280	vacuole,plasma membrane,golgi	122711	66006.4	96459.9	35378.5	1.27214	0.345361
plastidial pyruvate kinase 2 [Phalaenopsis equestris]	15	5	XP_020577583.1	AT5G52920	plastid	111121	72601.3	110393	69001.7	1.00659	0.98456
Ribulose bisphosphate carboxylase/oxygenase activase, chloroplastic OS=Arabidopsis thaliana GN=RCA PE=1 SV=2	14	5	P10896	AT2G39730	plastid	65408.2	69536.1	75140	72697.5	0.870485	0.862022
serine carboxypeptidase-like [Dendrobium catenatum]	12	5	XP_020694860.1	AT3G10410	vacuole	43380	34690.8	88280	100909	0.491391	0.273441
ribonuclease TUDOR 1-like [Phalaenopsis equestris]	9	5	XP_020576978.1	AT5G07350	nucleus	42011.8	27575.4	39694.6	35111.2	1.05838	0.926164
heat shock cognate 70 kDa protein 2 [Dendrobium catenatum]	652	4	XP_020704871.1	AT3G12580	cytosol	1.94188e+07	1.7773e+07	7.67851e+06	2.30996e+06	2.52898	0.069055
enolase 2-like [Phalaenopsis equestris]	412	4	XP_020577518.1	AT2G36530	cytosol	2.44371e+06	1.03448e+06	2.40835e+06	892293	1.01468	0.94243
elongation factor 2 [Dendrobium catenatum]	340	4	XP_020673612.1	AT1G56070	cytosol	4.42161e+06	1.41608e+06	3.50231e+06	1.07306e+06	1.26248	0.159149
heat shock protein 81-1-like [Dendrobium catenatum]	330	4	XP_020673292.1	AT5G56010	cytosol	2.00507e+06	647550	2.5232e+06	1.29306e+06	0.794652	0.343982
probable glutathione S-transferase GSTF1 [Dendrobium catenatum]	299	4	XP_020683199.1	AT3G62760	cytosol	1.15888e+07	4.41943e+06	1.53039e+07	6.54063e+06	0.757244	0.213248
phospholipase D alpha 1 [Phalaenopsis equestris]	277	4	XP_020572452.1	AT3G15730	cytosol	2.9456e+06	1.12637e+06	3.15822e+06	1.46532e+06	0.932676	0.753961
cysteine synthase [Phalaenopsis equestris]	252	4	XP_020589232.1	AT4G14880	cytosol	2.79648e+06	751088	2.49798e+06	1.24568e+06	1.1195	0.581612
ruBisCO large subunit-binding protein subunit beta, chloroplastic [Phalaenopsis equestris]	209	4	XP_020571861.1	AT3G13470	plastid	1.72383e+06	374152	1.70383e+06	1.05256e+06	1.01174	0.962093
nucleoside diphosphate kinase 1 [Dendrobium catenatum]	202	4	XP_020675421.1	AT4G09320	cytosol	1.26762e+06	553596	2.34643e+06	915325	0.540232	0.0138186
catalase isozyme 1 [Phalaenopsis equestris]	192	4	XP_020578222.1	AT4G35090	peroxisome	112759	57334.4	84344	22659.8	1.3369	0.195321
LOW QUALITY PROTEIN: peroxidase 12-like [Phalaenopsis equestris]	157	4	XP_020598493.1	AT1G71695	extracellular	2.2869e+06	562220	2.2761e+06	1.03389e+06	1.00474	0.980329
Alcohol dehydrogenase 1 OS=Zea mays GN=ADH1 PE=2 SV=1	141	4	P00333	AT1G77120	cytosol	1.89807e+06	805821	3.05216e+06	1.30742e+06	0.621878	0.0455897
2,3-bisphosphoglycerate-independent phosphoglycerate mutase [Dendrobium catenatum]	137	4	XP_020689384.1	AT1G09780	cytosol	1.00731e+06	411340	1.11145e+06	551852	0.906304	0.681001
Ribulose bisphosphate carboxylase small chain 1A, chloroplastic OS=Arabidopsis thaliana GN=RBCS-1A PE=1 SV=2	132	4	P10795	AT1G67090	plastid	223642	194615	457487	532324	0.48885	0.281974
sucrose synthase 4 [Dendrobium catenatum]	130	4	XP_020688567.1	AT4G02280	mitochondrion	427321	166972	419300	97845.5	1.01913	0.906131
tubulin beta chain [Dendrobium catenatum]	125	4	XP_020682090.1	AT5G12250	cytosol	29723.4	22941.1	49558.6	73937.3	0.599763	0.598347
fructokinase-1 [Dendrobium catenatum]	121	4	XP_020702381.1	AT2G31390	cytosol	321448	102045	373330	203589	0.86103	0.543925
stromal 70 kDa heat shock-related protein, chloroplastic-like, partial [Phalaenopsis equestris]	106	4	XP_020594620.1	AT5G49910	plastid	115731	55327.3	139425	64185.9	0.830054	0.446997
leucine aminopeptidase 2, chloroplastic-like [Phalaenopsis equestris]	103	4	XP_020572667.1	AT2G24200	cytosol	579259	224091	692683	91940.5	0.836254	0.189109
phosphoenolpyruvate carboxylase 2 [Dendrobium catenatum]	94	4	XP_020675747.1	AT1G53310	cytosol	416167	186611	316284	137586	1.3158	0.235974
putative aconitate hydratase, cytoplasmic [Dendrobium catenatum]	87	4	XP_020706127.1	AT2G05710	mitochondrion	785480	303062	902641	515145	0.870202	0.598846
calreticulin [Dendrobium catenatum]	85	4	XP_020684556.1	AT1G56340	endoplasmic reticulum	978890	453788	967976	552400	1.01128	0.966658
ADP,ATP carrier protein 1, mitochondrial-like [Phalaenopsis equestris]	80	4	XP_020578522.1	AT4G28390	mitochondrion	470167	158688	573480	180858	0.819848	0.248231
heat shock protein 83 [Phalaenopsis equestris]	79	4	XP_020585303.1	AT5G52640	cytosol	179987	152464	111854	66386.3	1.60912	0.248395
succinate--CoA ligase [ADP-forming] subunit beta, mitochondrial [Dendrobium catenatum]	76	4	XP_020676420.1	AT2G20420	mitochondrion	433956	188803	481148	205192	0.901918	0.642213
Alcohol dehydrogenase 1 OS=Pisum sativum PE=3 SV=1	70	4	P12886	AT1G77120	cytosol	757923	297857	871427	294001	0.86975	0.456632
Endoplasmin homolog OS=Hordeum vulgare PE=2 SV=1	70	4	P36183	AT4G24190	endoplasmic reticulum	276739	129893	310532	106356	0.891178	0.575193
peroxiredoxin-2E-1, chloroplastic [Dendrobium catenatum]	62	4	XP_020673035.1	AT3G52960	plastid	451360	315431	324608	93495.5	1.39048	0.272188
apoptosis-inducing factor homolog B-like [Phalaenopsis equestris]	61	4	XP_020580361.1	AT3G44190	cytosol	278516	180817	378106	156311	0.736608	0.254959
phosphoglucomutase, chloroplastic isoform X1 [Phalaenopsis equestris]	60	4	XP_020582829.1	AT5G51820	plastid	356605	195486	347135	118575	1.02728	0.90634
ras-related protein RABB1c [Phalaenopsis equestris]	60	4	XP_020599124.1	AT4G17170	vacuole	174823	95952.3	227234	88741.7	0.769352	0.274266
40S ribosomal protein S15a [Dendrobium catenatum]	55	4	XP_028555608.1	AT5G59850	cytosol	313746	140724	353243	107486	0.888187	0.533551
probable 60S ribosomal protein L14 [Phalaenopsis equestris]	53	4	XP_020584863.1	AT4G27090	cytosol	215957	97554.4	262280	97252.7	0.823383	0.358497
calmodulin isoform X1 [Dendrobium catenatum]	51	4	XP_020701640.1	AT2G27030	plasma membrane	728980	873468	379893	226240	1.91891	0.269241
membrane steroid-binding protein 2-like [Phalaenopsis equestris]	49	4	XP_020580429.1	AT3G48890	endoplasmic reticulum	289960	229428	329480	144078	0.880051	0.679843
isoflavone reductase homolog isoform X1 [Phalaenopsis equestris]	47	4	XP_020591755.1	AT4G39230	cytosol	469053	248291	384637	186323	1.21947	0.448763
transketolase, chloroplastic [Dendrobium catenatum]	45	4	XP_020704794.1	AT3G60750	plastid	127750	62531.8	184268	88387.5	0.693283	0.168893
L-ascorbate peroxidase, cytosolic [Dendrobium catenatum]	45	4	XP_020693706.1	AT1G07890	cytosol	358137	161317	353301	285405	1.01369	0.96833
selenium-binding protein 2-like [Dendrobium catenatum]	43	4	XP_020689610.1	AT4G14040	cytosol	167614	133477	164998	119003	1.01586	0.967491
60S ribosomal protein L23 isoform X1 [Phalaenopsis equestris]	41	4	XP_020570797.1	AT3G04400	nucleus,cytosol	235822	96954.1	276791	122854	0.851986	0.47802
GTP-binding protein SAR1A [Phalaenopsis equestris]	41	4	XP_020597188.1	AT4G02080	plasma membrane	163869	62327	166433	69750.2	0.984595	0.939915
pectin acetylesterase 11-like [Phalaenopsis equestris]	40	4	XP_020579386.1	AT5G45280	extracellular	226785	180986	151004	139357	1.50185	0.358174
malate dehydrogenase, glyoxysomal [Phalaenopsis equestris]	40	4	XP_020599658.1	AT2G22780	peroxisome	283638	179842	300406	125942	0.944184	0.829523
uncharacterized protein LOC110102859 [Dendrobium catenatum]	39	4	XP_020687010.1	AT5G61510	mitochondrion	251974	110581	356989	94203.1	0.705831	0.0570982
NADH-cytochrome b5 reductase-like protein isoform X1 [Dendrobium catenatum]	36	4	XP_020685101.1	AT5G20080	mitochondrion	283730	111748	302550	157320	0.937795	0.791168
Linoleate 9S-lipoxygenase 1 OS=Phaseolus vulgaris GN=LOXA PE=3 SV=1	36	4	P27480	AT1G55020	golgi	2.31491e+06	473434	1.344e+06	1.11475e+06	1.72241	0.0453004
3-isopropylmalate dehydratase small subunit 3 [Dendrobium catenatum]	35	4	XP_020683790.1	AT2G43090	plastid	257878	146026	310062	70487.2	0.831699	0.38481
succinate dehydrogenase [ubiquinone] flavoprotein subunit, mitochondrial [Phalaenopsis equestris]	35	4	XP_020584701.1	AT5G66760	mitochondrion	284962	184562	262892	176742	1.08395	0.810817
primary amine oxidase-like [Phalaenopsis equestris]	35	4	XP_020581681.1	AT4G12290	plasma membrane	125721	79560.1	143105	77759.9	0.878527	0.665979
dihydrolipoyl dehydrogenase 1, mitochondrial [Dendrobium catenatum]	34	4	XP_020686374.1	AT1G48030	mitochondrion	165432	62812	181996	47265.5	0.908984	0.555839
60S ribosomal protein L7a-1-like [Phalaenopsis equestris]	33	4	XP_020586998.1	AT3G62870	cytosol	210729	117652	218925	96404.1	0.962565	0.880206
ATP-citrate synthase beta chain protein 2 OS=Arabidopsis thaliana GN=ACLB-2 PE=1 SV=1	32	4	Q9FGX1	AT5G49460	cytosol	65270.4	37785	92369.1	65123.8	0.706627	0.339333
glutamine synthetase nodule isozyme [Dendrobium catenatum]	31	4	XP_020675739.1	AT5G37600	cytosol	166488	145509	145654	79537.2	1.14303	0.749983
26S proteasome non-ATPase regulatory subunit 7 homolog A [Dendrobium catenatum]	30	4	XP_020702631.1	AT5G05780	nucleus,cytosol	365212	372575	89210.7	42944.5	4.09381	0.0436423
40S ribosomal protein S13 isoform X1 [Phalaenopsis equestris]	30	4	XP_020573218.1	AT4G00100	cytosol	274313	176681	335077	200804	0.818655	0.534957
60S ribosomal protein L9 [Dendrobium catenatum]	30	4	XP_028549797.1	AT1G33140	cytosol	93576.6	70389.9	101890	39888.7	0.918409	0.769955
alanine aminotransferase 2 [Dendrobium catenatum]	27	4	XP_020704108.1	AT1G72330	mitochondrion	252497	124826	310705	109701	0.812659	0.408192
Succinyl-CoA ligase [ADP-forming] subunit beta, mitochondrial OS=Oryza sativa subsp. japonica GN=Os02g0621700 PE=1 SV=1	26	4	Q6K9N6	AT2G20420	mitochondrion	239185	61298.9	211709	80459.5	1.12978	0.462665
glyoxylate/succinic semialdehyde reductase 1 [Dendrobium catenatum]	26	4	XP_020680158.1	AT3G25530	cytosol	137646	41313.6	114525	45226.7	1.20189	0.30678
ubiquitin carboxyl-terminal hydrolase 13 isoform X1 [Dendrobium catenatum]	26	4	XP_020672846.1	AT3G11910	cytosol	136942	131708	80203.6	33986.3	1.70743	0.240272
NADP-dependent glyceraldehyde-3-phosphate dehydrogenase [Phalaenopsis equestris]	25	4	XP_020578502.1	AT2G24270	cytosol	207735	191124	107798	122483	1.92708	0.2232
ubiquitin-conjugating enzyme E2 36 [Dendrobium catenatum]	24	4	XP_020696628.1	AT1G78870	golgi	72202	39445.9	82410.1	51011.5	0.876131	0.696107
60S ribosomal protein L10a [Dendrobium catenatum]	23	4	XP_020703048.1	AT1G08360	cytosol	312813	499798	1.00471e+06	478678	0.311346	0.0123968
heterogeneous nuclear ribonucleoprotein Q [Dendrobium catenatum]	23	4	XP_020697323.1	AT3G52660	nucleus	123765	79883.4	169138	104717	0.731737	0.354053
methylthioribose kinase [Dendrobium catenatum]	22	4	XP_020687341.1	AT1G49820	cytosol	93630.3	28965	71497.3	12417.3	1.30956	0.056648
pyruvate decarboxylase 1 [Dendrobium catenatum]	22	4	XP_020683921.1	AT5G01320	cytosol	270304	144878	307794	152781	0.878196	0.624542
dnaJ protein homolog [Phalaenopsis equestris]	20	4	XP_020598627.1	AT5G22060	cytosol	70765.9	37371.3	53560.1	26581.9	1.32124	0.337744
60S ribosomal protein L21-1 [Phalaenopsis equestris]	20	4	XP_020575134.1	AT1G09690	cytosol	99864.9	113861	237616	122752	0.420278	0.0310552	-0.699628	1.53501
aldehyde dehydrogenase family 2 member B7, mitochondrial [Dendrobium catenatum]	18	4	XP_020703503.1	AT1G23800	mitochondrion	102394	111342	78509.5	92658.2	1.30423	0.645927
60S ribosomal protein L4-1-like [Dendrobium catenatum]	18	4	XP_020696985.1	AT3G09630	cytosol	96816.1	77920.4	130025	71250.6	0.744597	0.387431
argininosuccinate synthase, chloroplastic [Dendrobium catenatum]	17	4	XP_020696634.1	AT4G24830	plastid	291307	215667	285047	228166	1.02196	0.956132
methylenetetrahydrofolate reductase 1 [Dendrobium catenatum]	16	4	XP_020684559.1	AT2G44160	cytosol	73440.7	55601.4	67006.5	71750	1.09602	0.87496
eukaryotic translation initiation factor 2 subunit alpha homolog [Dendrobium catenatum]	15	4	XP_020687250.1	AT2G40290	cytosol	68139.5	72291.5	73911.5	43941.3	0.921908	0.855266
extensin-2 [Dendrobium catenatum]	14	4	XP_020674150.1	AT4G08370	extracellular	26038.6	11581.1	82565.5	60799.9	0.315369	0.0773371
Cytochrome b-c1 complex subunit 7-2 OS=Arabidopsis thaliana GN=QCR7-2 PE=1 SV=1	14	4	F4JWS8	AT5G25450	mitochondrion	76858.2	43263.3	72620	54604	1.05836	0.868013
pyruvate dehydrogenase E1 component subunit alpha-3, chloroplastic isoform X1 [Phalaenopsis equestris]	12	4	XP_020587215.1	AT1G01090	plastid	54523.6	36781.4	42142.1	38258.5	1.2938	0.657097
fructose-bisphosphate aldolase 1, chloroplastic [Dendrobium catenatum]	11	4	XP_020689727.1	AT4G38970	plastid	89093.9	67564.2	40825.7	40228.2	2.1823	0.136546
Glyceraldehyde-3-phosphate dehydrogenase B, chloroplastic OS=Arabidopsis thaliana GN=GAPB PE=1 SV=2	10	4	P25857	AT1G42970	plastid	150629	106515	258170	84759.6	0.58345	0.0389563
ribulose bisphosphate carboxylase/oxygenase activase, chloroplastic isoform X1 [Dendrobium catenatum]	9	4	XP_020694726.1	AT2G39730	plastid	32609.2	472.687	63102	0	0.51677	N/A
2-Cys peroxiredoxin BAS1, chloroplastic OS=Arabidopsis thaliana GN=BAS1 PE=1 SV=2	9	4	Q96291	AT3G11630	plastid	94509.6	41833.5	94113.7	34201.1	1.00421	0.984736
T-complex protein 1 subunit epsilon [Dendrobium catenatum]	8	4	XP_020679106.1	AT1G24510	cytosol	101918	78226.3	62569	77612.2	1.62888	0.405666
bifunctional L-3-cyanoalanine synthase/cysteine synthase 1, mitochondrial [Phalaenopsis equestris]	7	4	XP_020581044.1	AT3G61440	mitochondrion	39684.1	35167.6	37148.6	27481.7	1.06825	0.911959
dihydrolipoyllysine-residue acetyltransferase component 2 of pyruvate dehydrogenase complex, mitochondrial-like isoform X1 [Phalaenopsis equestris]	6	4	XP_020591087.1	AT3G13930	mitochondrion	11587.6	7982.27	25029.4	17756.6	0.46296	0.129112
elongation factor 1-alpha [Dendrobium catenatum]	539	3	XP_020680578.1	AT5G60390	cytosol	6.18497e+06	1.36451e+06	6.36111e+06	1.56444e+06	0.972311	0.815882
heat shock cognate 70 kDa protein 2 [Dendrobium catenatum]	462	3	XP_020682933.1	AT3G12580	cytosol	99437.4	62125.5	79525.8	40370.1	1.25038	0.450748
monodehydroascorbate reductase 3, cytosolic [Dendrobium catenatum]	407	3	XP_020673044.1	AT5G03630	cytosol	9.27125e+06	5.66898e+06	6.36538e+06	2.03707e+06	1.45651	0.175347
glyceraldehyde-3-phosphate dehydrogenase GAPC2, cytosolic [Phalaenopsis equestris]	302	3	XP_020593213.1	AT1G13440	nucleus,cytosol	6.42901e+06	2.39322e+06	7.44717e+06	3.15772e+06	0.863283	0.486891
cysteine synthase [Dendrobium catenatum]	283	3	XP_020675262.1	AT4G14880	cytosol	1.71436e+06	419705	1.06543e+06	468335	1.60907	0.0108141
heat shock cognate 70 kDa protein [Dendrobium catenatum]	273	3	XP_020702550.1	AT3G12580	cytosol	441711	388381	509380	273617	0.867153	0.722172
luminal-binding protein 4 [Dendrobium catenatum]	268	3	XP_020702866.1	AT5G42020	endoplasmic reticulum	1.21477e+06	541226	1.30451e+06	483817	0.931212	0.731174
monodehydroascorbate reductase-like [Phalaenopsis equestris]	267	3	XP_020581523.1	AT3G52880	peroxisome	3.05481e+06	1.73931e+06	1.9149e+06	719582	1.59529	0.0951869
tubulin beta chain [Dendrobium catenatum]	240	3	XP_020682666.1	AT5G23860	cytosol	2.05262e+06	1.04033e+06	1.82882e+06	1.01279e+06	1.12238	0.670127
ruBisCO large subunit-binding protein subunit beta, chloroplastic [Dendrobium catenatum]	211	3	XP_020703956.1	AT3G13470	plastid	162773	7597.71	164056	58559.6	0.992181	0.976962
LOW QUALITY PROTEIN: ruBisCO large subunit-binding protein subunit alpha-like [Phalaenopsis equestris]	196	3	XP_020593410.1	AT2G28000	plastid	302414	123079	400899	265108	0.75434	0.37383
5-methyltetrahydropteroyltriglutamate--homocysteine methyltransferase 2 isoform X3 [Dendrobium catenatum]	185	3	XP_020687014.1	AT5G17920	cytosol	375555	312229	266118	243058	1.41123	0.442072
Beta-glucosidase 44 OS=Arabidopsis thaliana GN=BGLU44 PE=2 SV=1	158	3	Q9LV33	AT3G18080	extracellular	127407	75260	219574	86070.2	0.580245	0.0389236
triosephosphate isomerase, cytosolic [Dendrobium catenatum]	158	3	XP_020682931.1	AT3G55440	cytosol	1.20187e+06	839263	1.36326e+06	689180	0.881617	0.678412
triosephosphate isomerase, cytosolic [Dendrobium catenatum]	156	3	XP_020695389.1	AT3G55440	cytosol	1.46925e+06	290322	1.72082e+06	488969	0.853808	0.243216
14-3-3-like protein 16R [Phalaenopsis equestris]	125	3	XP_020593234.1	AT1G78300	cytosol	741175	499883	1.05576e+06	467144	0.702032	0.212917
Peptidyl-prolyl cis-trans isomerase CYP19-1 OS=Arabidopsis thaliana GN=CYP19-1 PE=1 SV=1	124	3	Q38900	AT2G16600	cytosol	2.40342e+07	1.8418e+07	4.44994e+07	2.24697e+07	0.540102	0.0678078
ricin B-like lectin R40G3 [Phalaenopsis equestris]	122	3	XP_020576380.1	AT2G39050	nucleus	2.78438e+06	862271	3.98719e+06	910425	0.69833	0.0161577
clathrin heavy chain 1 [Dendrobium catenatum]	116	3	XP_020680390.1	AT3G11130	plasma membrane	477139	365257	629558	327764	0.757895	0.392783
2-oxoglutarate dehydrogenase, mitochondrial [Dendrobium catenatum]	111	3	XP_020671736.1	AT5G65750	mitochondrion	426331	308370	534328	191888	0.797883	0.404034
Elongation factor 1-alpha OS=Daucus carota PE=2 SV=1	110	3	P34823	AT5G60390	cytosol	261661	129244	154641	52147.5	1.69206	0.038845
pyruvate kinase 1, cytosolic [Dendrobium catenatum]	102	3	XP_020677973.1	AT3G52990	cytosol	580955	205046	599184	176700	0.969577	0.851025
Enolase OS=Oryza sativa subsp. japonica GN=ENO1 PE=1 SV=2	100	3	Q42971	AT2G36530	cytosol	1.52886e+06	1.34349e+06	1.93712e+06	1.55555e+06	0.789243	0.58733
fructose-bisphosphate aldolase 1, cytoplasmic [Phalaenopsis equestris]	98	3	XP_020577049.1	AT2G36460	cytosol	289859	277155	281272	202098	1.03053	0.955936
NADP-dependent malic enzyme isoform X1 [Dendrobium catenatum]	96	3	XP_020676952.1	AT5G25880	cytosol	491253	100358	554833	108069	0.885407	0.245029
aldehyde dehydrogenase family 7 member B4 [Dendrobium catenatum]	96	3	XP_020678333.2	AT1G54100	cytosol	578584	358654	572427	231510	1.01076	0.967407
Peptidyl-prolyl cis-trans isomerase OS=Catharanthus roseus GN=PCKR1 PE=2 SV=1	95	3	Q39613	AT2G16600	cytosol	1.63529e+06	317237	1.95114e+06	635720	0.838122	0.243911
L-ascorbate peroxidase, cytosolic isoform X1 [Dendrobium catenatum]	84	3	XP_028555691.1	AT3G09640	cytosol	740039	228661	765976	155163	0.966138	0.791049
heat shock protein 90-6, mitochondrial [Dendrobium catenatum]	83	3	XP_028554362.1	AT3G07770	mitochondrion	72895.1	43434.8	94263.2	62019.4	0.773314	0.516735
probable linoleate 9S-lipoxygenase 5 [Dendrobium catenatum]	83	3	XP_020698350.1	AT1G55020	golgi	330152	106802	153519	98200.8	2.15056	0.00278154
Heat shock protein 90-4 OS=Arabidopsis thaliana GN=HSP90-4 PE=2 SV=1	82	3	O03986	AT5G56000	cytosol	194830	159484	356733	297886	0.546153	0.209621
Ribulose bisphosphate carboxylase small chain 3B, chloroplastic OS=Arabidopsis thaliana GN=RBCS-3B PE=1 SV=2	80	3	P10798	AT5G38410	plastid	258283	0	109999	85621.2	2.34806	N/A
aldehyde dehydrogenase family 7 member B4 [Phalaenopsis equestris]	77	3	XP_020582445.1	AT1G54100	cytosol	182740	180501	159178	116445	1.14803	0.771823
Formate dehydrogenase, mitochondrial OS=Solanum tuberosum GN=FDH1 PE=1 SV=2	76	3	Q07511	AT5G14780	mitochondrion	720928	290507	640636	188470	1.12533	0.51426
Aconitate hydratase 2, mitochondrial OS=Arabidopsis thaliana GN=ACO2 PE=1 SV=2	70	3	Q9SIB9	AT2G05710	mitochondrion	323876	132679	436624	179230	0.741773	0.180985
T-complex protein 1 subunit beta isoform X1 [Dendrobium catenatum]	67	3	XP_020701218.1	AT5G20890	cytosol	270632	133474	273786	127882	0.988479	0.962248
lactoylglutathione lyase GLX1 [Dendrobium catenatum]	67	3	XP_020688662.1	AT1G11840	peroxisome	469389	135767	418777	133599	1.12085	0.465575
phosphoglucomutase, cytoplasmic [Dendrobium catenatum]	65	3	XP_020704442.1	AT1G23190	cytosol	376438	178322	537333	125290	0.700568	0.0504315
alpha-glucan water dikinase, chloroplastic [Dendrobium catenatum]	63	3	XP_020683987.1	AT1G10760	plastid	682012	286125	382572	107694	1.7827	0.0109761
Elongation factor 1-alpha OS=Zea mays GN=EF1A PE=3 SV=1	61	3	Q41803	AT5G60390	cytosol	679148	427739	873223	705094	0.777748	0.535125
Elongation factor 2 OS=Beta vulgaris PE=2 SV=1	60	3	O23755	AT1G56070	cytosol	86998.1	60924	147500	71221.5	0.589818	0.0908892
40S ribosomal protein S8 [Phalaenopsis equestris]	59	3	XP_020572270.1	AT5G59240	nucleus,cytosol	246855	84270.5	195346	77605.3	1.26368	0.22236
NADP-dependent malic enzyme [Phalaenopsis equestris]	58	3	XP_020577798.1	AT1G79750	plastid	1.20415e+06	859799	686447	396635	1.75417	0.130169
pyruvate dehydrogenase E1 component subunit beta, mitochondrial isoform X1 [Phalaenopsis equestris]	57	3	XP_020581404.1	AT5G50850	mitochondrion	193127	80096.1	311485	115183	0.620021	0.033432
uncharacterized protein LOC110033527 [Phalaenopsis equestris]	56	3	XP_020593203.1	AT1G09310	cytosol	456497	267814	412410	449547	1.1069	0.820394
RuBisCO large subunit-binding protein subunit beta, chloroplastic OS=Pisum sativum PE=1 SV=2	56	3	P08927	AT5G56500	plastid	133289	94913.1	159573	90165.8	0.83529	0.648557
leucine aminopeptidase 2, chloroplastic [Dendrobium catenatum]	56	3	XP_028555290.1	AT2G24200	cytosol	106752	51730	116959	53011.2	0.91273	0.805411
mitochondrial outer membrane porin-like [Dendrobium catenatum]	55	3	XP_020683153.1	AT3G01280	mitochondrion	756037	311739	958592	222857	0.788695	0.149719
40S ribosomal protein S21 [Phalaenopsis equestris]	54	3	XP_020578479.1	AT5G27700	cytosol	208536	108702	270443	143656	0.771091	0.355409
serine hydroxymethyltransferase 4-like [Dendrobium catenatum]	53	3	XP_020690881.1	AT4G13930	cytosol	186854	102099	296607	275697	0.629971	0.328577
phosphoglucan, water dikinase, chloroplastic [Dendrobium catenatum]	52	3	XP_020674169.1	AT5G26570	plastid	154941	68502.7	180813	44883.9	0.85691	0.377154
glycine-rich RNA-binding protein 2 [Dendrobium catenatum]	49	3	XP_020704402.1	AT2G21660	nucleus	230986	65728.4	276722	113633	0.834724	0.354634
importin subunit alpha-2 [Dendrobium catenatum]	47	3	XP_020699595.1	AT3G06720	nucleus	364337	155621	345378	269694	1.05489	0.869786
60S acidic ribosomal protein P2 isoform X1 [Dendrobium catenatum]	46	3	XP_020675236.1	AT3G44590	cytosol	213905	69643.3	167114	64575	1.28	0.183357
ATP-dependent Clp protease proteolytic subunit 5, chloroplastic [Dendrobium catenatum]	45	3	XP_020689606.1	AT1G02560	plastid	138042	63321.1	217415	100601	0.634924	0.0854145
NAD(P)H dehydrogenase (quinone) FQR1 [Dendrobium catenatum]	44	3	XP_020703897.1	AT4G27270	plasma membrane	268538	127308	291462	162220	0.921346	0.761722
Chlorophyll a-b binding protein 2, chloroplastic OS=Arabidopsis thaliana GN=LHCB1.1 PE=1 SV=1	43	3	P0CJ48	AT1G29910	plastid	162450	134786	164344	173703	0.988471	0.981231
60S ribosomal protein L5-like [Phalaenopsis equestris]	43	3	XP_020587871.1	AT3G25520	cytosol	765067	824584	186032	68821.4	4.11257	0.0453494
ATP synthase subunit d, mitochondrial isoform X1 [Dendrobium catenatum]	42	3	XP_028556727.1	AT3G52300	mitochondrion	231823	112640	330064	140543	0.702358	0.149282
Probable aldo-keto reductase 2 OS=Oryza sativa subsp. indica GN=OsI_15387 PE=3 SV=1	42	3	A2XRZ0	AT1G60710	cytosol	195476	165110	282014	202383	0.693143	0.370679
26S proteasome regulatory subunit 6A homolog [Dendrobium catenatum]	40	3	XP_020678413.1	AT3G05530	nucleus,cytosol	73528.8	28535.6	117670	60096.6	0.624871	0.110444
60S ribosomal protein L12-like [Dendrobium catenatum]	40	3	XP_020684849.1	AT5G60670	cytosol	388388	94609.5	378847	111714	1.02518	0.858228
LOW QUALITY PROTEIN: probable acetyl-CoA acetyltransferase, cytosolic 2 [Dendrobium catenatum]	39	3	XP_028552334.1	AT5G47720	peroxisome	162165	84959.4	190739	73191.4	0.85019	0.48058
26S protease regulatory subunit 7 [Phalaenopsis equestris]	39	3	XP_020578453.1	AT1G53750	nucleus,cytosol	99059.3	38550.4	138561	47125.7	0.714914	0.0900975
uncharacterized protein LOC110113586 [Dendrobium catenatum]	38	3	XP_020701888.1	AT2G32520	cytosol	908782	280225	939396	526671	0.96741	0.890433
5-methyltetrahydropteroyltriglutamate--homocysteine methyltransferase OS=Solenostemon scutellarioides GN=MET PE=1 SV=2	37	3	Q42662	AT5G17920	cytosol	144649	90454	107279	46725.8	1.34834	0.301977
5-methyltetrahydropteroyltriglutamate--homocysteine methyltransferase OS=Arabidopsis thaliana GN=CIMS PE=1 SV=1	36	3	O50008	AT5G17920	cytosol	204715	179640	237106	161796	0.863393	0.709818
Clathrin heavy chain 1 OS=Oryza sativa subsp. japonica GN=Os11g0104900 PE=3 SV=1	35	3	Q2RBN7	AT3G11130	plasma membrane	102853	61060.2	118241	54323.2	0.869858	0.601554
phosphoserine aminotransferase 2, chloroplastic-like [Phalaenopsis equestris]	34	3	XP_020581856.1	AT4G35630	plastid	172014	56712.6	179195	79506.3	0.959926	0.841658
chaperone protein ClpB3, chloroplastic [Dendrobium catenatum]	34	3	XP_028552617.1	AT5G15450	plastid	92420.8	60109.3	129734	58954.5	0.712389	0.23032
proteasome subunit beta type-1 [Phalaenopsis equestris]	34	3	XP_020581752.1	AT3G60820	nucleus,cytosol	152722	50603.3	172591	33924.7	0.884881	0.36284
RNA-binding KH domain-containing protein PEPPER [Dendrobium catenatum]	34	3	XP_020690305.1	AT4G26000	nucleus	93819	15735.8	119150	30326.5	0.787401	0.0604044
5-methyltetrahydropteroyltriglutamate--homocysteine methyltransferase OS=Catharanthus roseus GN=METE PE=2 SV=1	33	3	Q42699	AT5G17920	cytosol	160436	129815	99862.1	91750.2	1.60657	0.32521
xylose isomerase isoform X1 [Dendrobium catenatum]	33	3	XP_020696236.1	AT5G57655	endoplasmic reticulum	136097	108695	95717.6	16244.1	1.42187	0.290814
3-phosphoshikimate 1-carboxyvinyltransferase 2 [Dendrobium catenatum]	31	3	XP_020683804.1	AT2G45300	plastid	282197	114051	346775	144363	0.813775	0.379063
Citrate synthase 1, peroxisomal OS=Arabidopsis thaliana GN=CSY1 PE=2 SV=1	31	3	Q9LXS7	AT3G58740	peroxisome	444867	160388	460308	184534	0.966456	0.86238
uncharacterized protein LOC110098281 isoform X1 [Dendrobium catenatum]	31	3	XP_028548865.1	AT2G44060	cytosol	126760	70182.7	79430.3	51903.1	1.59586	0.140809
NADP-dependent D-sorbitol-6-phosphate dehydrogenase [Dendrobium catenatum]	31	3	XP_020683796.1	AT2G21250	cytosol	75827	30028	71243.6	21601.4	1.06433	0.727511
26S proteasome regulatory subunit 4 homolog B-like [Phalaenopsis equestris]	30	3	XP_020577634.1	AT4G29040	nucleus,cytosol	80721.1	32190.3	128096	77871	0.630163	0.211415
40S ribosomal protein S4-like [Phalaenopsis equestris]	30	3	XP_020589631.1	AT5G58420	cytosol	166942	82900.9	206341	87076.3	0.809063	0.371937
glutelin type-A 1-like [Phalaenopsis equestris]	28	3	XP_020579616.1	AT2G28680	vacuole	283235	102148	276889	92600.9	1.02292	0.898122
Pyruvate dehydrogenase E1 component subunit alpha, mitochondrial OS=Solanum tuberosum PE=1 SV=1	27	3	P52903	AT1G59900	mitochondrion	308358	95242.1	290917	73912.9	1.05995	0.685538
fumarylacetoacetase [Dendrobium catenatum]	26	3	XP_020687539.1	AT1G12050	cytosol	156203	54069.1	157344	93109.3	0.992743	0.977205
Chaperonin CPN60-1, mitochondrial OS=Zea mays GN=CPN60I PE=1 SV=2	26	3	P29185	AT3G23990	mitochondrion	58422.6	28848.1	99124.1	67269.1	0.589388	0.177387
Adenylate kinase B OS=Oryza sativa subsp. japonica GN=ADK-B PE=2 SV=1	26	3	Q08480	AT5G63400	mitochondrion	360677	218566	408187	255056	0.883609	0.698611
26S proteasome non-ATPase regulatory subunit 14 homolog [Phalaenopsis equestris]	26	3	XP_020590198.1	AT5G23540	nucleus,cytosol	67138.3	43794.2	112853	92654.5	0.594917	0.243158
Tubulin alpha-6 chain OS=Zea mays GN=TUBA6 PE=2 SV=1	25	3	P33627	AT5G19780	cytosol	34100.1	16175	34174.6	20365	0.997819	0.995028
proteasome subunit beta type-5-like isoform X1 [Phalaenopsis equestris]	24	3	XP_020587213.1	AT3G26340	nucleus,cytosol	118039	29524.2	151927	69400	0.77695	0.241258
galactokinase [Dendrobium catenatum]	23	3	XP_028550935.1	AT3G06580	cytosol	89938.7	49130.5	219615	105165	0.40953	0.00744063
60S ribosomal protein L23A [Dendrobium catenatum]	23	3	XP_020674710.1	AT3G55280	cytosol	94403	57366.9	155364	73556.6	0.607623	0.0886967
protein disulfide isomerase-like 1-4 [Phalaenopsis equestris]	22	3	XP_020584852.1	AT5G60640	endoplasmic reticulum	349359	175689	368067	310043	0.949172	0.89981
eukaryotic peptide chain release factor GTP-binding subunit ERF3A [Dendrobium catenatum]	22	3	XP_020672514.1	AT1G18070	cytosol	60414.9	36313.4	71823.7	48740.1	0.841155	0.61057
pyrophosphate--fructose 6-phosphate 1-phosphotransferase subunit beta [Phalaenopsis equestris]	21	3	XP_020590602.1	AT1G12000	golgi	84642.2	32637.3	67973.5	30451.8	1.24522	0.307666
bibenzyl synthase [Phalaenopsis equestris]	21	3	XP_020572026.1	AT5G13930	endoplasmic reticulum	175869	93573	81378.6	53733.8	2.16112	0.0221303
T-complex protein 1 subunit alpha OS=Arabidopsis thaliana GN=CCT1 PE=2 SV=1	21	3	P28769	AT3G20050	cytosol	91189	62846.9	69292.7	34947.8	1.316	0.390753
DEAD-box ATP-dependent RNA helicase 56 isoform X1 [Dendrobium catenatum]	21	3	XP_020683303.1	AT5G11170	nucleus	96429.9	36559.5	101886	56808.5	0.946449	0.827146
aldo-keto reductase family 4 member C9-like [Phalaenopsis equestris]	20	3	XP_020588706.1	AT2G37770	plastid	133134	67921.9	180967	84778.3	0.735682	0.239045
bifunctional nitrilase/nitrile hydratase NIT4 [Dendrobium catenatum]	20	3	XP_020693643.1	AT5G22300	plasma membrane	111726	21850	40360.9	25726.7	2.76818	2.28022e-05
60S ribosomal protein L13a-4 [Dendrobium catenatum]	20	3	XP_020674029.1	AT5G48760	cytosol	242244	162151	200474	78536.8	1.20835	0.509101
2-dehydro-3-deoxyphosphooctonate aldolase [Phalaenopsis equestris]	19	3	XP_020584598.1	AT1G16340	extracellular	112200	115875	119376	61774.8	0.939886	0.886488
glutamate-1-semialdehyde 2,1-aminomutase, chloroplastic-like [Phalaenopsis equestris]	19	3	XP_020591007.1	AT3G48730	plastid	39808.4	19263.5	46909.9	22317	0.848615	0.511377
26S proteasome non-ATPase regulatory subunit 1 homolog A-like [Phalaenopsis equestris]	19	3	XP_020579450.1	AT2G32730	nucleus,cytosol	68324.9	31467.6	84514.2	26684.2	0.808443	0.282101
serpin-ZXA [Phalaenopsis equestris]	19	3	XP_020584147.1	AT1G47710	cytosol	140380	126061	82734.7	25388.2	1.69675	0.202152
40S ribosomal protein S23 [Phalaenopsis equestris]	19	3	XP_020588846.1	AT5G02960	cytosol	188217	84099.5	201684	93548.2	0.933228	0.774462
glycine-rich RNA-binding protein RZ1A [Dendrobium catenatum]	19	3	XP_028552026.1	AT3G26420	nucleus	79309.2	41337.7	78201.9	59259.9	1.01416	0.973754
ras-related protein RIC1 isoform X1 [Dendrobium catenatum]	19	3	XP_020690879.1	AT1G02130	endoplasmic reticulum,golgi	107240	80620.4	166778	72784.4	0.643013	0.140789
ras-related protein RABA2a-like [Dendrobium catenatum]	19	3	XP_020678797.1	AT1G09630	plasma membrane,cytosol	64869.9	28710.1	73392	46656.2	0.883882	0.697123
mitochondrial import receptor subunit TOM40-1 [Phalaenopsis equestris]	18	3	XP_020600383.1	AT3G20000	mitochondrion	52555.9	39730.1	56823.6	33672.4	0.924896	0.825658
LOW QUALITY PROTEIN: T-complex protein 1 subunit delta-like [Phalaenopsis equestris]	17	3	XP_020592442.1	AT3G18190	cytosol	35390	11170.3	40917.5	22215.1	0.86491	0.553576
60S ribosomal protein L15-1 [Phalaenopsis equestris]	17	3	XP_020584839.1	AT4G17390	cytosol	65645.9	43063.6	58857	36120	1.11535	0.772391
thioredoxin reductase NTRB-like [Dendrobium catenatum]	17	3	XP_020696866.1	AT4G35460	mitochondrion	54042.1	31144	63622.8	19581.8	0.849414	0.476339
isocitrate dehydrogenase [NAD] catalytic subunit 5, mitochondrial-like [Phalaenopsis equestris]	16	3	XP_020572712.1	AT5G03290	mitochondrion	60148.8	40756.7	48094.5	20904.5	1.25064	0.477754
dihydrolipoyl dehydrogenase 2, chloroplastic [Dendrobium catenatum]	15	3	XP_020686790.1	AT3G16950	plastid	43838	28933.5	39461.1	21307.8	1.11092	0.741559
KH domain-containing protein HEN4-like isoform X1 [Phalaenopsis equestris]	15	3	XP_020580840.1	AT5G15270	nucleus	63421.8	27086.9	170118	115561	0.372811	0.0283657
formate--tetrahydrofolate ligase [Dendrobium catenatum]	15	3	XP_020697676.1	AT1G50480	cytosol	42650.4	24707.4	73679.9	41877.9	0.57886	0.126084
puromycin-sensitive aminopeptidase isoform X1 [Dendrobium catenatum]	15	3	XP_020679823.1	AT1G63770	plastid	50209.4	20921.9	45713	38909.1	1.09836	0.813094
protein disulfide-isomerase-like [Dendrobium catenatum]	15	3	XP_020688941.1	AT1G21750	endoplasmic reticulum	95564.6	73511.3	67862.6	57838.7	1.40821	0.568601
DEAD-box ATP-dependent RNA helicase 52B [Dendrobium catenatum]	15	3	XP_020676652.1	AT2G42520	nucleus	45444.5	32635.3	61115.1	33464.4	0.743588	0.448153
glutamate--cysteine ligase, chloroplastic [Dendrobium catenatum]	14	3	XP_020672259.1	AT4G23100	plastid	345929	733864	78050.9	61089.5	4.4321	0.294597
NHP2-like protein 1 [Phalaenopsis equestris]	14	3	XP_020584427.1	AT4G22380	nucleus	371619	466134	409225	285981	0.908102	0.854284
ABC transporter G family member 44-like [Dendrobium catenatum]	14	3	XP_020691769.1	AT1G15520	plasma membrane	85713.4	75204.5	79928	99651.2	1.07238	0.901653
Malate dehydrogenase, mitochondrial OS=Brassica napus GN=MDH PE=2 SV=1	13	3	Q43744	AT1G53240	mitochondrion	43823.7	0	111446	0	0.393228	N/A
ATP synthase CF1 alpha subunit (chloroplast) [Phalaenopsis equestris]	13	3	YP_006073253.1	ATCG00120	plastid	26079.7	9554.42	53726.6	31638.1	0.485416	0.0381766
mitochondrial import inner membrane translocase subunit TIM8 isoform X1 [Dendrobium catenatum]	12	3	XP_028550916.1	AT5G50810	mitochondrion	27514.7	20116.5	51777.6	25837.9	0.531402	0.045659
protein argonaute 4B-like [Phalaenopsis equestris]	11	3	XP_020583523.1	AT2G27040	nucleus	36360.2	22347.1	51965.7	42431.5	0.699697	0.485784
adenosine kinase 2 [Dendrobium catenatum]	11	3	XP_020687168.2	AT5G03300	cytosol	170539	85551.9	159839	84805	1.06694	0.80592
uncharacterized protein LOC110035522 [Phalaenopsis equestris]	11	3	XP_020595417.1	AT2G35040	plastid	91765.8	17809.8	161621	50892.8	0.567784	0.0026492
20 kDa chaperonin, chloroplastic OS=Arabidopsis thaliana GN=CPN21 PE=1 SV=2	10	3	O65282	AT5G20720	plastid	22141.3	11134.8	40034.6	27452.8	0.553053	0.196531
26S proteasome non-ATPase regulatory subunit 12 homolog A isoform X1 [Dendrobium catenatum]	10	3	XP_020704680.1	AT5G64760	nucleus,cytosol	28896.6	9479.25	39305.3	20923	0.735183	0.348452
ubiquitin carboxyl-terminal hydrolase 14 [Dendrobium catenatum]	10	3	XP_028550487.1	AT3G20630	cytosol	44086.6	23569.9	39480.5	32549.1	1.11667	0.772196
T-complex protein 1 subunit epsilon OS=Arabidopsis thaliana GN=At1g24510 PE=2 SV=1	9	3	O04450	AT1G24510	cytosol	21128.3	4047.47	25161.8	12605.6	0.839697	0.458738
enoyl-CoA delta isomerase 2, peroxisomal-like [Phalaenopsis equestris]	9	3	XP_020592148.1	AT4G14430	peroxisome	43819.9	24757	94896.8	59733.7	0.461764	0.111362
superoxide dismutase [Mn], mitochondrial-like [Phalaenopsis equestris]	8	3	XP_020585288.1	AT3G10920	mitochondrion	187461	151830	159804	126818	1.17306	0.696673
glutamate dehydrogenase 1, mitochondrial isoform X1 [Phalaenopsis equestris]	7	3	XP_020580297.1	AT5G18170	mitochondrion	29137.6	4016.86	23784.9	12712.7	1.22505	0.470395
Probable fructose-bisphosphate aldolase 2, chloroplastic OS=Arabidopsis thaliana GN=FBA2 PE=1 SV=2	6	3	Q944G9	AT4G38970	plastid	68354.3	9779.25	22243.4	11711.7	3.07302	3.86738e-10	0.725749	1.62945
SKP1-like protein 1B [Phalaenopsis equestris]	6	3	XP_020586884.1	AT1G75950	cytosol	49084.4	5690.1	53469.4	45713.2	0.917991	0.888066
protein FAR1-RELATED SEQUENCE 5 isoform X1 [Dendrobium catenatum]	6	3	XP_028548855.1	AT4G15090	nucleus	21644.3	13962.3	29174.6	18975.5	0.741889	0.399969
importin subunit beta-1 [Phalaenopsis equestris]	6	3	XP_020577701.1	AT5G53480	plastid,nucleus,cytosol	46993.3	33362.7	22168.4	11539	2.11983	0.185066
5'-methylthioadenosine/S-adenosylhomocysteine nucleosidase 2-like [Phalaenopsis equestris]	5	3	XP_020590240.1	AT4G38800	cytosol	7571.18	2963.04	20927.8	16054	0.361776	0.156927
isovaleryl-CoA dehydrogenase, mitochondrial [Dendrobium catenatum]	5	3	XP_028551966.1	AT3G45300	mitochondrion	38527.5	36491.4	34201.4	26289	1.12649	0.859509
photosystem II 44 kDa protein (chloroplast) [Dendrobium catenatum]	5	3	YP_009472263.1	ATCG00280	plastid	33513.8	8055.31	76376.9	0	0.438795	N/A
eukaryotic translation initiation factor [Dendrobium catenatum]	5	3	XP_020692633.1	AT5G57870	nucleus,cytosol	61745.3	48487.8	20482.7	7897.92	3.01451	0.104895
40S ribosomal protein S2-3 OS=Arabidopsis thaliana GN=RPS2C PE=1 SV=2	5	3	P49688	AT2G41840	cytosol	0	NA	41354.1	38311.5	0.01	2.32367e-16
aspartate aminotransferase, chloroplastic [Dendrobium catenatum]	4	3	XP_020690773.1	AT4G31990	plastid	33933.2	16213.7	46166.4	37100.2	0.735018	0.53462
trans-cinnamate 4-monooxygenase-like [Dendrobium catenatum]	4	3	XP_020685658.1	AT2G30490	endoplasmic reticulum	92135.7	87621	39766.9	43762.3	2.3169	0.367849
glycine dehydrogenase (decarboxylating), mitochondrial-like [Phalaenopsis equestris]	3	3	XP_020590288.1	AT4G33010	mitochondrion	23988.1	11904.1	34202.8	20303.6	0.701349	0.540414
LOW QUALITY PROTEIN: heat shock cognate 70 kDa protein 2-like [Phalaenopsis equestris]	594	2	XP_020580702.1	AT3G12580	cytosol	28286.9	11360.5	111216	64271.7	0.254343	0.00359163
pathogenesis-related protein 1-like [Dendrobium catenatum]	536	2	XP_020695565.1	AT1G24020	golgi	1.76518e+07	3.94451e+06	1.34796e+07	3.07962e+06	1.30952	0.0303489
elongation factor 1-alpha-like [Phalaenopsis equestris]	471	2	XP_020580890.1	AT5G60390	cytosol	758736	247359	821897	318660	0.923151	0.669961
glyceraldehyde-3-phosphate dehydrogenase 2, cytosolic isoform X1 [Dendrobium catenatum]	342	2	XP_020696320.1	AT1G13440	nucleus,cytosol	2.81476e+06	1.30392e+06	3.42614e+06	1.18279e+06	0.821555	0.340955
luminal-binding protein 4 [Dendrobium catenatum]	309	2	XP_020703959.1	AT5G42020	endoplasmic reticulum	326775	161665	284854	141527	1.14716	0.588247
luminal-binding protein 2 [Phalaenopsis equestris]	289	2	XP_020577119.1	AT5G42020	endoplasmic reticulum	833452	526508	537347	326203	1.55105	0.187065
phosphoglycerate kinase, cytosolic [Dendrobium catenatum]	253	2	XP_020678278.1	AT1G79550	cytosol	65891.4	50196.2	126092	80004.7	0.522566	0.0992915
Glyceraldehyde-3-phosphate dehydrogenase, cytosolic OS=Sinapis alba GN=GAPC PE=2 SV=2	253	2	P04796	AT1G13440	nucleus,cytosol	6.46048e+06	2.25269e+06	7.5728e+06	2.50042e+06	0.853117	0.369366
5-methyltetrahydropteroyltriglutamate--homocysteine methyltransferase 2 [Dendrobium catenatum]	237	2	XP_020674285.1	AT5G17920	cytosol	2.62294e+06	1.39803e+06	2.57954e+06	1.90112e+06	1.01682	0.960073
actin-7 [Dendrobium catenatum]	235	2	XP_028555495.1	AT5G09810	cytosol	167749	117749	318633	151128	0.526465	0.0403941
elongation factor 2-like [Phalaenopsis equestris]	231	2	XP_020598417.1	AT1G56070	cytosol	245503	249935	339548	267365	0.72303	0.501598
sucrose synthase 2 [Dendrobium catenatum]	230	2	XP_020697542.1	AT3G43190	cytosol	672443	577914	1.34456e+06	1.25964e+06	0.500122	0.206602
sucrose synthase 2 [Phalaenopsis equestris]	211	2	XP_020587352.1	AT3G43190	cytosol	1.15921e+06	1.29532e+06	2.17235e+06	3.1995e+06	0.533619	0.438833
tubulin beta chain-like [Phalaenopsis equestris]	210	2	XP_020574558.1	AT5G62700	cytosol	125983	68552.2	173886	65447.6	0.724519	0.173557
Glyceraldehyde-3-phosphate dehydrogenase 2, cytosolic OS=Zea mays GN=GAPC2 PE=2 SV=1	209	2	Q09054	AT3G04120	nucleus,cytosol	2.72552e+06	1.09314e+06	3.16991e+06	1.49115e+06	0.859812	0.515781
5-methyltetrahydropteroyltriglutamate--homocysteine methyltransferase 2-like isoform X3 [Phalaenopsis equestris]	206	2	XP_020578159.1	AT5G17920	cytosol	264845	231162	158695	101764	1.66889	0.494065
probable aldo-keto reductase 2 [Dendrobium catenatum]	203	2	XP_020675244.1	AT1G60710	cytosol	179920	70683.8	112243	71791.1	1.60294	0.382772
Glyceraldehyde-3-phosphate dehydrogenase, cytosolic OS=Mesembryanthemum crystallinum GN=GAPC PE=2 SV=1	184	2	P17878	AT1G13440	nucleus,cytosol	3.75885e+06	1.75621e+06	2.50819e+06	1.06376e+06	1.49863	0.0978619
ATP synthase subunit alpha, mitochondrial OS=Oryza sativa subsp. indica GN=ATPA PE=2 SV=1	183	2	P0C521	ATMG01190	mitochondrion	2.07472e+06	769437	2.0726e+06	540458	1.00103	0.994907
Enolase OS=Alnus glutinosa GN=PGH1 PE=2 SV=1	174	2	Q43321	AT2G36530	cytosol	2.92951e+06	1.77156e+06	1.19954e+06	545650	2.4422	0.0141528
probable linoleate 9S-lipoxygenase 3 [Phalaenopsis equestris]	171	2	XP_020580260.1	AT1G55020	golgi	2.93293e+06	607820	2.32595e+06	2.17603e+06	1.26096	0.480921
14-3-3-like protein [Dendrobium catenatum]	154	2	XP_020687226.1	AT5G38480	cytosol	147119	66805.9	153184	88324.3	0.960412	0.881361
NADP-dependent malic enzyme-like [Phalaenopsis equestris]	143	2	XP_020594029.1	AT5G25880	cytosol	505334	107601	527554	128460	0.95788	0.716848
furostanol glycoside 26-O-beta-glucosidase-like [Dendrobium catenatum]	142	2	XP_028556317.1	AT2G44480	vacuole	2.81675e+06	2.15547e+06	1.46876e+06	970710	1.91777	0.1153
malate dehydrogenase [Phalaenopsis equestris]	141	2	XP_020589761.1	AT5G43330	cytosol	541578	125812	567462	315547	0.954386	0.839361
histone H4-like [Phalaenopsis equestris]	134	2	XP_020591214.1	AT5G59970	nucleus	27190.9	17959.5	54854	37425.7	0.495696	0.120645
stromal 70 kDa heat shock-related protein, chloroplastic [Dendrobium catenatum]	133	2	XP_020691195.1	AT4G24280	plastid	709540	302604	827907	300444	0.857029	0.446451
fructose-bisphosphate aldolase 1, cytoplasmic-like [Dendrobium catenatum]	128	2	XP_020703251.1	AT2G36460	cytosol	1.84627e+06	1.25967e+06	1.58822e+06	473121	1.16248	0.581157
Ribulose bisphosphate carboxylase large chain (Fragment) OS=Catesbaea spinosa GN=rbcL PE=3 SV=1	109	2	Q33383	ATCG00490	plastid	457764	577946	26450.9	9417.25	23.608	2.32367e-16
LOW QUALITY PROTEIN: endoplasmin homolog [Phalaenopsis equestris]	106	2	XP_020581987.1	AT4G24190	endoplasmic reticulum	92460.8	50592.1	62719.6	41308.4	1.47419	0.213888
Adenosylhomocysteinase OS=Triticum aestivum GN=SAHH PE=2 SV=1	104	2	P32112	AT4G13940	cytosol	825500	375591	1.10672e+06	542171	0.745895	0.25688
malate dehydrogenase, chloroplastic [Dendrobium catenatum]	103	2	XP_028553051.1	AT3G47520	plastid	785428	252426	770651	320878	1.01918	0.921244
3-ketoacyl-CoA thiolase 2, peroxisomal [Dendrobium catenatum]	101	2	XP_020679342.1	AT2G33150	peroxisome	457144	289996	502197	115289	0.910287	0.677737
2-oxoglutarate dehydrogenase, mitochondrial-like [Phalaenopsis equestris]	100	2	XP_020582994.1	AT3G55410	mitochondrion	2618.49	79.8457	20011.2	8130.6	0.130851	4.97483e-07
heat shock 70 kDa protein, mitochondrial-like [Phalaenopsis equestris]	95	2	XP_020575953.1	AT4G37910	mitochondrion	54681.5	0	25307.8	10478.2	2.16066	N/A
Enolase OS=Solanum lycopersicum GN=PGH1 PE=2 SV=1	94	2	P26300	AT2G36530	cytosol	1.68408e+06	1.90696e+06	1.8364e+06	2.11076e+06	0.917056	0.882892
probable linoleate 9S-lipoxygenase 5 [Phalaenopsis equestris]	94	2	XP_020590849.1	AT1G55020	golgi	832480	125503	527598	323234	1.57787	0.0241678
fructose-bisphosphate aldolase 1, cytoplasmic [Dendrobium catenatum]	93	2	XP_020679120.1	AT2G36460	cytosol	497786	406840	258009	101678	1.92934	0.27505	0.806533	3.39523
chaperone protein ClpC1, chloroplastic [Phalaenopsis equestris]	90	2	XP_020587661.1	AT5G50920	plastid	430466	422073	582126	110693	0.739472	0.319236
phosphoglycerate kinase, cytosolic [Dendrobium catenatum]	88	2	XP_020700037.1	AT1G56190	plastid	118231	58224.4	92095.8	39236.9	1.28378	0.300994
elongation factor 1-gamma 2 [Dendrobium catenatum]	82	2	XP_020677915.1	AT1G09640	cytosol	309035	204344	316917	144201	0.975128	0.929179
probable histone H2A.3 [Phalaenopsis equestris]	81	2	XP_020589462.1	AT4G27230	nucleus	1.57357e+06	521716	1.4317e+06	777959	1.09909	0.682194
glyceraldehyde-3-phosphate dehydrogenase GAPCP2, chloroplastic [Dendrobium catenatum]	80	2	XP_020678409.1	AT1G16300	plastid	1.97081e+06	1.39357e+06	2.59657e+06	1.09433e+06	0.759005	0.329369
LOW QUALITY PROTEIN: citrate synthase 3, peroxisomal-like [Phalaenopsis equestris]	80	2	XP_020600132.1	AT3G58750	peroxisome	354346	129823	562078	323386	0.630421	0.126467
40S ribosomal protein S8 [Dendrobium catenatum]	80	2	XP_020672355.1	AT5G59240	nucleus,cytosol	122074	43822.4	131177	69484.6	0.930602	0.764826
annexin D1 [Dendrobium catenatum]	80	2	XP_020691110.1	AT1G35720	peroxisome	1.85437e+06	1.19126e+06	1.49101e+06	739672	1.2437	0.465882
LOW QUALITY PROTEIN: alpha-1,4 glucan phosphorylase L isozyme, chloroplastic/amyloplastic-like [Phalaenopsis equestris]	79	2	XP_020579782.1	AT3G29320	plastid	288509	348340	374049	267628	0.771314	0.747146
ATP-citrate synthase beta chain protein 1 [Dendrobium catenatum]	76	2	XP_020674090.1	AT5G49460	cytosol	432486	299596	372252	312071	1.16181	0.701317
actin-depolymerizing factor 7 isoform X2 [Dendrobium catenatum]	75	2	XP_020693099.2	AT5G59890	cytosol	503777	270822	639765	401615	0.78744	0.450679
probable fructokinase-1 [Phalaenopsis equestris]	73	2	XP_020576957.1	AT2G31390	cytosol	37349.5	18506.7	67437.3	50152	0.553841	0.148222
pathogenesis-related protein 1-like [Phalaenopsis equestris]	73	2	XP_020589637.1	AT1G24020	golgi	1.21387e+06	772298	793594	477826	1.52959	0.200777
peroxidase 12-like, partial [Dendrobium catenatum]	72	2	XP_020687220.1	AT1G71695	extracellular	939997	564200	1.00785e+06	493480	0.932673	0.800934
S-adenosylmethionine synthase 5 [Dendrobium catenatum]	70	2	XP_020704336.1	AT4G01850	nucleus,cytosol	518784	355810	513929	441692	1.00945	0.981319
Beta-glucosidase 5 OS=Oryza sativa subsp. japonica GN=BGLU5 PE=2 SV=1	69	2	Q5JK35	AT1G02850	extracellular	2.08805e+06	1.23616e+06	1.56854e+06	675568	1.33121	0.300851
LOW QUALITY PROTEIN: cell division cycle protein 48 homolog [Phalaenopsis equestris]	66	2	XP_020583525.1	AT3G53230	nucleus,cytosol	30712.7	17561.5	69941.3	89638.4	0.439121	0.347156
histone H3.3 [Dendrobium catenatum]	66	2	XP_020672589.1	AT5G10980	nucleus	966252	429505	1.07681e+06	647664	0.897326	0.700576
phosphoglucomutase, chloroplastic [Dendrobium catenatum]	65	2	XP_028548099.1	AT5G51820	plastid	142370	114286	178606	73478.5	0.797118	0.453919
Heat shock 70 kDa protein, mitochondrial OS=Solanum tuberosum GN=HSP68 PE=2 SV=1	64	2	Q08276	AT5G09590	mitochondrion	156359	56681.9	174429	73576.3	0.896407	0.597118
Fructose-bisphosphate aldolase, cytoplasmic isozyme 2 OS=Pisum sativum PE=3 SV=1	63	2	P46257	AT3G52930	cytosol	583722	175548	592396	204605	0.985357	0.929645
histone H2AX [Dendrobium catenatum]	63	2	XP_020682257.1	AT1G54690	nucleus	137721	81183.3	207941	211256	0.662308	0.443862
Formate dehydrogenase 1, mitochondrial OS=Oryza sativa subsp. japonica GN=Os06g0486800 PE=1 SV=2	63	2	Q9SXP2	AT5G14780	mitochondrion	307879	224402	316411	197280	0.973036	0.936571
Linoleate 9S-lipoxygenase (Fragment) OS=Phaseolus vulgaris PE=2 SV=1	63	2	P27481	AT1G55020	golgi	1.26789e+06	624791	785770	556870	1.61357	0.134915
hexokinase-2-like [Phalaenopsis equestris]	61	2	XP_020593906.1	AT4G29130	mitochondrion	60517.6	24767.6	70868.3	17247	0.853944	0.340168
probable cytosolic oligopeptidase A isoform X1 [Phalaenopsis equestris]	61	2	XP_020578051.1	AT5G65620	plastid	93170.3	44930.6	93935.3	21934.6	0.991856	0.965013
Heat shock cognate protein 80 OS=Solanum lycopersicum GN=HSC80 PE=2 SV=1	60	2	P36181	AT5G56010	cytosol	199135	93939.2	172591	114167	1.1538	0.624326
hexokinase-1-like [Dendrobium catenatum]	59	2	XP_020681014.1	AT4G29130	mitochondrion	199678	105646	250844	69702.3	0.796024	0.262271
elongation factor Tu, mitochondrial [Phalaenopsis equestris]	59	2	XP_020587836.1	AT4G02930	mitochondrion	244684	82988.6	264629	128975	0.92463	0.725449
NADP-dependent malic enzyme isoform X1 [Dendrobium catenatum]	57	2	XP_020691338.1	AT1G79750	plastid	454143	30014.3	447410	259989	1.01505	0.970392
Phosphoglucomutase, cytoplasmic 2 OS=Zea mays PE=2 SV=2	56	2	P93805	AT1G23190	cytosol	201294	127823	137201	44095.2	1.46715	0.182138
glucose-6-phosphate isomerase, cytosolic isoform X1 [Dendrobium catenatum]	56	2	XP_020701278.1	AT5G42740	cytosol	252800	144377	219373	100277	1.15238	0.593128
ATP synthase subunit beta-3, mitochondrial OS=Arabidopsis thaliana GN=At5g08680 PE=2 SV=1	56	2	Q9C5A9	AT5G08680	mitochondrion	93497.4	99907.8	23042.1	10516.6	4.05768	0.175587
citrate synthase, mitochondrial [Phalaenopsis equestris]	55	2	XP_020591344.1	AT2G44350	mitochondrion	244156	243575	217886	123200	1.12057	0.78314
Dehydrin COR47 OS=Arabidopsis thaliana GN=COR47 PE=1 SV=2	55	2	P31168	AT1G20440	nucleus	708985	295253	980573	183125	0.723031	0.0385987
elongation factor 1-delta [Dendrobium catenatum]	55	2	XP_020675505.1	AT1G30230	cytosol	370927	155374	589144	268695	0.629603	0.072378
glyoxysomal fatty acid beta-oxidation multifunctional protein MFP-a isoform X1 [Dendrobium catenatum]	54	2	XP_020689146.1	AT3G06860	peroxisome	94943	71310.4	94151.9	48655.1	1.0084	0.980702
phosphoenolpyruvate carboxylase 2 [Dendrobium catenatum]	53	2	XP_020672336.1	AT1G53310	cytosol	35338	7090.7	18997.5	11192.8	1.86013	0.000832759
biotin carboxylase 2, chloroplastic isoform X4 [Dendrobium catenatum]	53	2	XP_020690456.1	AT5G35360	plastid	133729	109006	182183	116023	0.734038	0.406464
ATP synthase subunit d, mitochondrial OS=Arabidopsis thaliana GN=At3g52300 PE=1 SV=3	52	2	Q9FT52	AT3G52300	mitochondrion	270244	120940	272896	124300	0.990283	0.966302
KH domain-containing protein At4g18375 [Dendrobium catenatum]	51	2	XP_020705960.1	AT5G46190	nucleus	183390	66609.6	291342	122827	0.629467	0.045108
Adenosylhomocysteinase OS=Petroselinum crispum GN=SAHH PE=2 SV=2	50	2	Q01781	AT4G13940	cytosol	95521.6	44384.8	48105.1	29086.6	1.98569	0.378043
Monodehydroascorbate reductase OS=Pisum sativum PE=1 SV=1	50	2	Q40977	AT3G52880	peroxisome	230170	117728	146089	93461.7	1.57555	0.13083
(Bos taurus) similar to alpha-tubulin I isoform 1	49	2	ENSEMBL:ENSBTAP00000016242	AT1G50010	cytosol	34356.8	16274.6	55379.4	34714.4	0.620389	0.277204
acyl-CoA-binding protein [Dendrobium catenatum]	49	2	XP_020703663.1	AT1G31812	cytosol	221164	86076.4	354809	203723	0.623333	0.121269
alcohol dehydrogenase 3 isoform X1 [Dendrobium catenatum]	48	2	XP_020677122.1	AT1G77120	cytosol	332288	140418	362032	138212	0.91784	0.676694
proteasome subunit alpha type-3 [Dendrobium catenatum]	48	2	XP_020689760.1	AT2G27020	nucleus,cytosol	146777	24239.9	167553	28033.6	0.876003	0.137538
LOW QUALITY PROTEIN: 40S ribosomal protein SA-like [Phalaenopsis equestris]	48	2	XP_020593040.1	AT1G72370	cytosol	432778	122402	421885	192645	1.02582	0.897327
uncharacterized protein LOC110114591 [Dendrobium catenatum]	47	2	XP_020703180.1	AT1G56580	cytosol	116490	70897.5	92276.2	89090.5	1.2624	0.582264
pyruvate dehydrogenase E1 component subunit beta-1, mitochondrial isoform X1 [Dendrobium catenatum]	46	2	XP_020687856.1	AT5G50850	mitochondrion	111013	43150.7	110251	43817.8	1.00691	0.972674
non-symbiotic hemoglobin 1-like [Phalaenopsis equestris]	46	2	XP_020596215.1	AT2G16060	cytosol	482690	180620	315335	128829	1.53072	0.046308
Alpha-1,4 glucan phosphorylase L isozyme, chloroplastic/amyloplastic OS=Vicia faba GN=PHO1 PE=2 SV=2	45	2	P53536	AT3G29320	plastid	460242	183639	559944	464899	0.821943	0.597155
probable cytosolic oligopeptidase A [Dendrobium catenatum]	45	2	XP_020688430.2	AT5G65620	plastid	89936.3	87378.7	158579	52974.1	0.567138	0.0703795	-0.70821	1.8788
Elongation factor 1-alpha OS=Daucus carota PE=1 SV=1	45	2	P29521	AT5G60390	cytosol	49776	29367.4	80222.8	62122.6	0.620471	0.309511
40S ribosomal protein S4-3 [Dendrobium catenatum]	44	2	XP_020696233.1	AT5G58420	cytosol	135924	54337	148671	62998.3	0.914263	0.674924
Adenosylhomocysteinase 2 OS=Arabidopsis thaliana GN=SAHH2 PE=1 SV=1	43	2	Q9LK36	AT3G23810	cytosol	437956	191271	820180	486567	0.533976	0.0656334
malate dehydrogenase, glyoxysomal [Dendrobium catenatum]	43	2	XP_020704354.1	AT2G22780	peroxisome	203362	121925	152402	24017.7	1.33437	0.241274
Nucleoside diphosphate kinase OS=Capsicum annuum PE=2 SV=1	43	2	Q9M7P6	AT4G09320	cytosol	198887	144314	357519	139135	0.556299	0.0405076
Adenosylhomocysteinase OS=Lupinus luteus GN=SAHH PE=1 SV=1	42	2	Q9SP37	AT4G13940	cytosol	32700.9	22243.6	74474.8	52222.1	0.439087	0.063557
superoxide dismutase [Cu-Zn] 4A [Phalaenopsis equestris]	42	2	XP_020590426.1	AT1G08830	cytosol	237072	138776	362543	312423	0.653913	0.334414
2,3-bisphosphoglycerate-independent phosphoglycerate mutase OS=Mesembryanthemum crystallinum GN=PGM1 PE=2 SV=1	41	2	Q42908	AT1G09780	cytosol	344036	256872	346065	212742	0.994136	0.986426
Luminal-binding protein 3 OS=Zea mays GN=BIPE3 PE=2 SV=1	41	2	O24581	AT5G42020	endoplasmic reticulum	196331	102633	186703	128356	1.05157	0.885918
probable linoleate 9S-lipoxygenase 5 [Dendrobium catenatum]	41	2	XP_020694140.1	AT1G55020	golgi	2.26556e+06	1.04681e+06	1.44137e+06	651704	1.57181	0.142016
ketol-acid reductoisomerase, chloroplastic isoform X1 [Phalaenopsis equestris]	40	2	XP_020596445.1	AT3G58610	plastid	216297	155384	333733	204743	0.648115	0.276259
NADP-dependent malic enzyme OS=Populus trichocarpa PE=2 SV=3	40	2	P34105	AT1G79750	plastid	337908	86195.4	324886	92613.5	1.04008	0.776923
histone H3.2 [Dendrobium catenatum]	40	2	XP_020694100.1	AT5G65360	nucleus	94225	27352.5	152322	91277.5	0.61859	0.145764
elongation factor 1-gamma 2-like [Phalaenopsis equestris]	40	2	XP_020573932.1	AT1G09640	cytosol	28251.6	29615.1	100353	37254.5	0.281523	0.000452239
nucleosome assembly protein 1;4-like [Phalaenopsis equestris]	38	2	XP_020583718.1	AT2G19480	nucleus	147003	67020.9	140697	55030.7	1.04482	0.838887
uncharacterized protein LOC110098618 [Dendrobium catenatum]	38	2	XP_020681157.1	AT5G63310	plastid	397940	204127	632440	137115	0.629213	0.0145679	-0.761074	2.30222
Ribulose bisphosphate carboxylase small chain 1B, chloroplastic OS=Arabidopsis thaliana GN=RBCS-1B PE=1 SV=1	38	2	P10796	AT5G38430	plastid	235669	195653	19295.1	11873.9	12.2139	0.000269165
glycine-rich protein 2-like [Dendrobium catenatum]	37	2	XP_020689074.1	AT4G38680	nucleus	1.12174e+06	491430	1.15458e+06	643971	0.971552	0.911954
Elongation factor 1-alpha OS=Glycine max GN=TEFS1 PE=3 SV=2	37	2	P25698	AT5G60390	cytosol	227972	124740	213244	140115	1.06907	0.829209
60S ribosomal protein L24-like [Phalaenopsis equestris]	37	2	XP_020578926.1	AT3G53020	cytosol	149707	70639.7	230638	62712.1	0.649097	0.02755
Aspartate aminotransferase, cytoplasmic OS=Daucus carota PE=2 SV=1	36	2	P28734	AT5G19550	cytosol	195157	98480.9	201886	71390.2	0.966669	0.87623
60S ribosomal protein L3 [Dendrobium catenatum]	36	2	XP_020687478.1	AT1G61580	cytosol	214501	137832	92101.6	61239.3	2.32896	0.0701337	0.707393	2.47472
Glucose-1-phosphate adenylyltransferase small subunit, chloroplastic OS=Arabidopsis thaliana GN=APS1 PE=2 SV=2	35	2	P55228	AT5G48300	plastid	268554	415861	192153	228347	1.3976	0.683352
Glucose-6-phosphate 1-dehydrogenase, cytoplasmic isoform OS=Solanum tuberosum GN=G6PDH PE=2 SV=1	35	2	P37830	AT5G40760	cytosol	124011	51932.7	124585	53769	0.995394	0.983083
Isocitrate dehydrogenase [NADP] OS=Glycine max GN=IDH1 PE=2 SV=2	35	2	Q06197	AT1G65930	cytosol	61841.6	12069.1	68047.3	17560.9	0.908803	0.433853
uncharacterized protein LOC110093550 [Dendrobium catenatum]	35	2	XP_020674130.1	AT2G43180	plastid	141337	62100.3	172031	36487.1	0.821579	0.23588
elongation factor Tu, chloroplastic [Dendrobium catenatum]	35	2	XP_020689281.1	AT4G20360	plastid	159702	30785.1	83120.4	54995.4	1.92133	0.00321332
60S ribosomal protein L13-1-like [Dendrobium catenatum]	35	2	XP_020702295.1	AT3G49010	cytosol	117995	50711	107299	44351.5	1.09969	0.659011
Cysteine synthase OS=Oryza sativa subsp. japonica GN=RCS1 PE=2 SV=2	34	2	Q9XEA6	AT4G14880	cytosol	0	NA	59187.5	0	N/A	N/A
heat shock 70 kDa protein 14 [Dendrobium catenatum]	34	2	XP_020701610.1	AT1G79930	cytosol	111266	62228.6	207935	64685.9	0.5351	0.00811892
Endoplasmin homolog OS=Catharanthus roseus GN=HSP90 PE=2 SV=1	34	2	P35016	AT4G24190	endoplasmic reticulum	78406	56572.2	68902.9	26705.6	1.13792	0.663754
mitochondrial-processing peptidase subunit alpha [Dendrobium catenatum]	34	2	XP_020691123.1	AT1G51980	mitochondrion	111723	43040.6	128527	55970.4	0.869259	0.51887
ubiquitin-conjugating enzyme E2 7 [Dendrobium catenatum]	34	2	XP_020679969.1	AT5G59300	nucleus	130047	50317.6	121954	48877.4	1.06636	0.749527
LOW QUALITY PROTEIN: 40S ribosomal protein S19-1-like [Phalaenopsis equestris]	34	2	XP_020575992.1	AT3G02080	cytosol	149611	85336.7	245557	127876	0.609272	0.105076
60S ribosomal protein L3-2 OS=Arabidopsis thaliana GN=ARP2 PE=2 SV=4	34	2	P22738	AT1G61580	cytosol	209643	152891	149906	104132	1.3985	0.367806
dihydroxy-acid dehydratase, chloroplastic [Dendrobium catenatum]	33	2	XP_020680229.1	AT3G23940	plastid	111406	61709.7	98435.2	53982.7	1.13177	0.66016
DNA-binding protein MNB1B-like [Phalaenopsis equestris]	33	2	XP_020582053.1	AT1G20693	nucleus	282338	211927	289613	215937	0.974881	0.952188
transketolase, chloroplastic-like [Phalaenopsis equestris]	32	2	XP_020596276.1	AT3G60750	plastid	148363	150163	80970	32580.1	1.83232	0.418216
Tubulin beta-3 chain (Fragment) OS=Pisum sativum GN=TUBB3 PE=2 SV=1	32	2	P29502	AT5G12250	cytosol	6718.8	2404.44	43737.5	43089	0.153617	0.4165
protein disulfide isomerase-like 2-2 [Dendrobium catenatum]	32	2	XP_020698051.1	AT2G47470	endoplasmic reticulum	160456	78256.9	129597	119158	1.23811	0.559864
Phosphoglucomutase, chloroplastic OS=Pisum sativum GN=PGMP PE=2 SV=1	31	2	Q9SM59	AT5G51820	plastid	48516.6	14691.2	69961.2	15916	0.693478	0.0136403
peptidyl-prolyl cis-trans isomerase [Phalaenopsis equestris]	31	2	XP_020584369.1	AT2G16600	cytosol	194621	80245.3	192024	62502.8	1.01353	0.942883
Alanine aminotransferase 2, mitochondrial OS=Arabidopsis thaliana GN=ALAAT2 PE=2 SV=1	30	2	Q9LDV4	AT1G72330	mitochondrion	152699	89115.6	202343	77334.9	0.754652	0.250629
cyanogenic beta-glucosidase-like isoform X1 [Phalaenopsis equestris]	30	2	XP_020586502.1	AT5G42260	extracellular	102088	49612.3	51616	15641.1	1.97783	0.0113301
ERBB-3 BINDING PROTEIN 1 [Dendrobium catenatum]	30	2	XP_020694037.1	AT3G51800	nucleus	69697.5	42923.6	134510	45463.4	0.51816	0.0103442
eukaryotic initiation factor 4A-3 [Dendrobium catenatum]	30	2	XP_020689282.1	AT3G19760	nucleus	132357	128083	160662	150014	0.823823	0.694531
V-type proton ATPase catalytic subunit A OS=Gossypium hirsutum GN=CVA69.24 PE=2 SV=1	30	2	P31405	AT1G78900	vacuole,golgi	91645.5	26897.7	124709	67241.6	0.734876	0.23481
Granule-bound starch synthase 1, chloroplastic/amyloplastic OS=Antirrhinum majus GN=WAXY PE=2 SV=1	29	2	O82627	AT1G32900	plastid	223445	204795	252730	121818	0.884127	0.727232
proteasome subunit beta type-6 [Phalaenopsis equestris]	29	2	XP_020582781.1	AT4G31300	nucleus,cytosol	165511	34325.5	193002	30164.3	0.857562	0.107864
60S ribosomal protein L5-1 OS=Oryza sativa subsp. japonica GN=RPL5A PE=2 SV=1	29	2	Q0JGY1	AT3G25520	cytosol	365993	141157	448864	153305	0.815375	0.282263
1,2-dihydroxy-3-keto-5-methylthiopentene dioxygenase homolog 2-like, partial [Dendrobium catenatum]	28	2	XP_020692354.2	AT4G14716	cytosol	136615	107240	151350	88910.5	0.902645	0.767719
Phosphoglucomutase, chloroplastic OS=Arabidopsis thaliana GN=PGMP PE=1 SV=2	28	2	Q9SCY0	AT5G51820	plastid	28585.2	22834.6	65047	20045.5	0.439455	0.000939372
acyl-CoA-binding protein [Phalaenopsis equestris]	28	2	XP_020582045.1	AT1G31812	cytosol	216720	60176.4	233012	105953	0.930083	0.719477
alcohol dehydrogenase class-3 [Phalaenopsis equestris]	28	2	XP_020578967.1	AT5G43940	peroxisome	183249	198042	79509	51025.3	2.30476	0.171051
histone H1-like [Phalaenopsis equestris]	27	2	XP_020592152.1	AT2G30620	nucleus	375860	112103	524966	145087	0.715971	0.0385316
adenine phosphoribosyltransferase 1 [Dendrobium catenatum]	27	2	XP_020688136.1	AT1G27450	cytosol	256056	183719	338406	109666	0.756651	0.282739
glycine--tRNA ligase, mitochondrial 1-like [Phalaenopsis equestris]	27	2	XP_020586265.1	AT1G29880	cytosol	74422.6	38215	76808.9	44270.1	0.968932	0.910832
bifunctional aspartate aminotransferase and glutamate/aspartate-prephenate aminotransferase [Dendrobium catenatum]	26	2	XP_020705389.1	AT2G22250	plastid	73409	36371.5	72209.4	51538.2	1.01661	0.964017
Probable linoleate 9S-lipoxygenase 5 OS=Solanum tuberosum GN=LOX1.5 PE=2 SV=1	26	2	Q43191	AT1G55020	golgi	871423	397212	1.11051e+06	1.01356e+06	0.784705	0.698282
glutathione S-transferase 2-like isoform X2 [Phalaenopsis equestris]	25	2	XP_020584502.1	AT2G02380	cytosol	229661	60141.8	298240	70143.3	0.770053	0.0551134
histone deacetylase HDT1-like isoform X2 [Phalaenopsis equestris]	25	2	XP_020581485.1	AT3G44750	nucleus	57671.6	35124	62417.9	39946	0.923959	0.815208
uncharacterized protein LOC110097510 isoform X1 [Dendrobium catenatum]	25	2	XP_020679561.1	AT5G16660	plastid	33956.1	17367.6	75242	20171.6	0.451291	0.000523474
protein DJ-1 homolog B [Phalaenopsis equestris]	25	2	XP_020587845.1	AT1G53280	plastid	112128	35504.4	84142.2	24068.7	1.3326	0.0794736
26S protease regulatory subunit 8 homolog A-like [Phalaenopsis equestris]	25	2	XP_020571478.1	AT5G19990	nucleus,cytosol	56603.2	27447.7	61093	17203.4	0.926509	0.780486
Elongation factor 1-delta OS=Pimpinella brachycarpa PE=2 SV=3	25	2	P93447	AT1G30230	cytosol	187085	73500.4	201460	72155.5	0.928647	0.699722
40S ribosomal protein S16 [Dendrobium catenatum]	25	2	XP_020676464.1	AT2G09990	cytosol	145201	100677	84445.5	27508.6	1.71946	0.104584
multiple organellar RNA editing factor 8, chloroplastic/mitochondrial-like isoform X1 [Phalaenopsis equestris]	25	2	XP_020592770.1	AT3G15000	mitochondrion	52134.6	27358.3	70651.1	31714	0.737916	0.261664
ornithine carbamoyltransferase, chloroplastic [Phalaenopsis equestris]	24	2	XP_020595558.1	AT1G75330	plastid	47113.7	19019	64315.5	23837.3	0.732542	0.13682
Alpha-glucan phosphorylase 1 OS=Arabidopsis thaliana GN=PHS1 PE=1 SV=1	24	2	Q9LIB2	AT3G29320	plastid	54701.9	64912	77074.4	101583	0.709729	0.72168
Dihydrolipoyllysine-residue succinyltransferase component of 2-oxoglutarate dehydrogenase complex 1, mitochondrial OS=Arabidopsis thaliana GN=At5g55070 PE=1 SV=1	24	2	Q9FLQ4	AT5G55070	mitochondrion	431653	192664	409180	179347	1.05492	0.812653
Heat shock 70 kDa protein 10, mitochondrial OS=Arabidopsis thaliana GN=HSP70-10 PE=1 SV=1	24	2	Q9LDZ0	AT5G09590	mitochondrion	124629	148764	58032.2	14197.7	2.14758	0.232158
peroxidase 5-like [Dendrobium catenatum]	24	2	XP_020695997.2	AT1G05260	extracellular	92688.9	52968.8	173853	147123	0.533145	0.180511
L-ascorbate peroxidase, cytosolic OS=Pisum sativum GN=APX1 PE=1 SV=2	24	2	P48534	AT1G07890	cytosol	286084	280785	160410	66230	1.78346	0.215275
ras-related protein RABE1c isoform X1 [Phalaenopsis equestris]	23	2	XP_020571683.1	AT5G59840	golgi	153574	145866	141712	115937	1.08371	0.876012
quinone oxidoreductase PIG3 [Phalaenopsis equestris]	23	2	XP_020587168.1	AT4G21580	cytosol	45793.5	19339.6	101294	21745.6	0.452085	6.81804e-05
NAD-dependent malic enzyme 1, mitochondrial OS=Arabidopsis thaliana GN=NAD-ME1 PE=1 SV=1	22	2	Q9SIU0	AT2G13560	mitochondrion	45971.4	15681.6	46894.5	12843.8	0.980316	0.902227
universal stress protein PHOS32 [Dendrobium catenatum]	22	2	XP_020690463.1	AT1G11360	nucleus	159511	71605.3	217018	54476.8	0.735012	0.0869057
ATP-dependent Clp protease proteolytic subunit 4, chloroplastic [Phalaenopsis equestris]	22	2	XP_020587412.1	AT5G45390	plastid	48834	25216.7	72307.2	32149.3	0.675369	0.130521
ubiquitin-conjugating enzyme E2 variant 1C [Phalaenopsis equestris]	22	2	XP_020599362.1	AT2G36060	cytosol	29585.1	11131.4	38565.1	22315	0.767147	0.410776
40S ribosomal protein S12-like [Dendrobium catenatum]	22	2	XP_020700361.1	AT2G32060	cytosol	108923	104805	152499	91321.9	0.714256	0.387739
RNA-binding KH domain-containing protein PEPPER-like isoform X1 [Phalaenopsis equestris]	22	2	XP_020592636.1	AT4G26000	nucleus	22696.6	17251.9	43925.9	18239.9	0.516701	0.065191
zinc finger CCCH domain-containing protein 31-like [Phalaenopsis equestris]	22	2	XP_020583211.1	AT5G06770	nucleus	121772	53827.2	118828	53855.8	1.02477	0.914835
protein TIC110, chloroplastic isoform X1 [Phalaenopsis equestris]	22	2	XP_020581657.1	AT1G06950	plastid	38136.5	21671.5	46083.6	25449.2	0.827551	0.517108
phospho-2-dehydro-3-deoxyheptonate aldolase 2, chloroplastic [Dendrobium catenatum]	21	2	XP_020695769.1	AT1G22410	plastid	68676	43171.8	92320.7	93373.7	0.743885	0.546657
soluble inorganic pyrophosphatase 1 [Dendrobium catenatum]	21	2	XP_028555607.1	AT3G53620	cytosol	175890	98636.3	167973	80472.6	1.04713	0.861885
26S protease regulatory subunit 6A homolog OS=Solanum lycopersicum GN=TBP1 PE=2 SV=1	21	2	P54776	AT3G05530	nucleus,cytosol	80234.8	30549.9	156903	103368	0.511364	0.214481
60S ribosomal protein L37a [Dendrobium catenatum]	21	2	XP_020700124.1	AT3G10950	cytosol	66470.4	20204.3	94569.2	67013.5	0.702876	0.296339
probable glutathione S-transferase GSTF1 [Dendrobium catenatum]	21	2	XP_028552545.1	AT3G62760	cytosol	167564	60945.1	123886	48825.1	1.35257	0.131031
D-amino-acid transaminase, chloroplastic-like [Phalaenopsis equestris]	20	2	XP_020576401.1	AT5G57850	plastid	389305	273726	252860	147339	1.53961	0.22108
cytochrome c-like [Phalaenopsis equestris]	20	2	XP_020584747.1	AT4G10040	mitochondrion	87246.1	26114.3	63751	18941	1.36854	0.0536066
Cytochrome c oxidase subunit 2 OS=Beta vulgaris GN=COX2 PE=2 SV=1	20	2	P98012	ATMG00160	mitochondrion	78521.1	41425.5	81181.6	20620.5	0.967228	0.869222
uncharacterized protein LOC110096392 [Dendrobium catenatum]	20	2	XP_020677977.2	AT2G32910	nucleus	340306	160050	373244	197862	0.911752	0.723805
60S ribosomal protein L7-2 [Phalaenopsis equestris]	20	2	XP_020596342.1	AT3G13580	cytosol	35373.4	20735	87872.4	49293.8	0.402554	0.0164646
uncharacterized protein LOC110021873 [Phalaenopsis equestris]	20	2	XP_020576228.1	AT2G44310	cytosol	702240	379304	704854	346075	0.996291	0.989047
Phosphoglycerate kinase, cytosolic OS=Nicotiana tabacum PE=2 SV=1	19	2	Q42962	AT1G79550	cytosol	95411	56167.7	89055.4	26948.3	1.07137	0.831711
DNA damage-repair/toleration protein DRT102 [Dendrobium catenatum]	19	2	XP_020701895.1	AT3G04880	cytosol	135324	74123	129362	53726.3	1.04609	0.854533
ATP synthase subunit O, mitochondrial-like [Phalaenopsis equestris]	19	2	XP_020597117.1	AT5G13450	mitochondrion	61010.7	20320.6	48579.7	17029.2	1.25589	0.201863
NADPH:quinone oxidoreductase [Dendrobium catenatum]	19	2	XP_020688671.1	AT3G27890	mitochondrion	47342.6	30023.4	59509.9	26670.6	0.795541	0.436375
thiamine thiazole synthase, chloroplastic isoform X2 [Dendrobium catenatum]	19	2	XP_020694355.1	AT5G54770	plastid	50189	18445.3	64447.6	30806.6	0.778757	0.292693
chlorophyll a-b binding protein 5, chloroplastic [Dendrobium catenatum]	19	2	XP_020689536.1	AT3G27690	plastid	233181	42696	152707	105846	1.52698	0.239439
ubiquitin-conjugating enzyme E2 variant 1C [Dendrobium catenatum]	19	2	XP_020684272.1	AT2G36060	cytosol	79508	30250.2	112975	47682.6	0.703766	0.123087
Non-cyanogenic beta-glucosidase OS=Trifolium repens PE=1 SV=1	18	2	P26204	AT5G42260	extracellular	104907	56631.6	70623.5	38495.2	1.48545	0.169982
Defensin-like protein OS=Gymnadenia conopsea PE=1 SV=1	18	2	B5LZ79	AT2G31957	extracellular	64932.6	31867	140278	114464	0.462885	0.107852
2-hydroxyacyl-CoA lyase [Phalaenopsis equestris]	18	2	XP_020595560.1	AT5G17380	peroxisome	83967.3	32045.2	87114.6	22673.1	0.963872	0.821273
Adenosine kinase 1 OS=Arabidopsis thaliana GN=ADK1 PE=1 SV=1	18	2	Q9SF85	AT3G09820	cytosol	42098.1	22519.4	46497.7	17307.8	0.905381	0.664563
caffeic acid 3-O-methyltransferase [Dendrobium catenatum]	18	2	XP_020680264.1	AT3G53140	cytosol	76680.7	47329.4	117976	49257.1	0.649967	0.125225
uncharacterized protein LOC110093560 [Dendrobium catenatum]	18	2	XP_020674141.1	AT2G43180	plastid	244664	147497	160309	90088	1.5262	0.178234
MFP1 attachment factor 1-like [Dendrobium catenatum]	18	2	XP_020688017.1	AT5G43070	nucleus	53880.6	26430.8	52200.1	22164.8	1.03219	0.891739
uncharacterized protein LOC110103721 [Dendrobium catenatum]	18	2	XP_020688191.1	AT1G50380	cytosol	97261	55201	68536.9	58792.2	1.4191	0.333274
LOW QUALITY PROTEIN: 70 kDa peptidyl-prolyl isomerase-like [Phalaenopsis equestris]	18	2	XP_020592175.1	AT5G48570	cytosol	77487	38554	137098	58132.5	0.565192	0.112397
60S ribosomal protein L30 OS=Zea mays GN=RPL30 PE=3 SV=1	18	2	O48558	AT1G77940	cytosol	58275.7	57119.2	76036.2	45694	0.766421	0.514549
glutamine synthetase nodule isozyme-like [Phalaenopsis equestris]	17	2	XP_020576223.1	AT5G37600	cytosol	83712.8	65264.2	117569	112394	0.712032	0.486201
chorismate synthase, chloroplastic [Dendrobium catenatum]	17	2	XP_020701400.1	AT1G48850	plastid	44619.8	18773.7	52413.6	47239.7	0.851303	0.68398
ribulose-phosphate 3-epimerase, chloroplastic isoform X1 [Phalaenopsis equestris]	17	2	XP_020586649.1	AT5G61410	plastid	43624.9	15441.5	37763.6	16581.2	1.15521	0.479344
mannose-1-phosphate guanyltransferase alpha isoform X1 [Phalaenopsis equestris]	17	2	XP_020593580.1	AT1G74910	cytosol	38713.5	32356.5	42714.5	26528.4	0.906331	0.796626
xyloglucan endotransglucosylase/hydrolase protein 22 [Dendrobium catenatum]	17	2	XP_020680644.1	AT5G57560	extracellular	59913.7	47682.9	90356.7	53995.9	0.66308	0.289525
Actin OS=Chlamydomonas reinhardtii PE=2 SV=1	17	2	P53498	AT3G12110	cytosol	9259.09	6201.68	202615	59283.2	0.045698	5.5684e-09	-0.812671	2.20998
2-methylene-furan-3-one reductase-like [Phalaenopsis equestris]	17	2	XP_020593403.1	AT1G23740	plastid	150332	126935	66527.1	15747.7	2.25972	0.0689557
60S ribosomal protein L6-3-like [Dendrobium catenatum]	17	2	XP_020696456.1	AT1G74050	cytosol	72328	18367.5	81441.5	42638.5	0.888098	0.602132
cytochrome c oxidase subunit 5b-1, mitochondrial [Dendrobium catenatum]	16	2	XP_020705167.1	AT3G15640	mitochondrion	108288	59110.8	103017	56343.8	1.05117	0.907599
bibenzyl synthase-like [Dendrobium catenatum]	16	2	XP_020691094.2	AT5G13930	endoplasmic reticulum	137495	40458.8	78830.3	70452.5	1.74419	0.0707075
T-complex protein 1 subunit gamma [Dendrobium catenatum]	16	2	XP_020688725.1	AT5G26360	cytosol	48709.4	23512.9	59753.2	24408.5	0.815176	0.374253
Alcohol dehydrogenase class-3 OS=Oryza sativa subsp. japonica GN=Os02g0815500 PE=2 SV=1	16	2	Q0DWH1	AT5G43940	peroxisome	69140.9	49685.3	82992.6	33814.9	0.833096	0.517723
uncharacterized protein LOC110114931 isoform X1 [Dendrobium catenatum]	16	2	XP_020703650.1	AT2G40600	plastid	56048.4	19102.6	64705.4	37596.8	0.866209	0.606143
Probable mitochondrial-processing peptidase subunit beta OS=Arabidopsis thaliana GN=At3g02090 PE=1 SV=2	16	2	Q42290	AT3G02090	mitochondrion	138234	113306	159785	153678	0.865124	0.775344
peptidyl-prolyl cis-trans isomerase [Dendrobium catenatum]	16	2	XP_020689035.1	AT2G16600	cytosol	199770	48414.1	91077.8	74770.7	2.1934	0.00402881
60S ribosomal protein L31 [Dendrobium catenatum]	16	2	XP_020673494.1	AT5G56710	cytosol	43869.2	25325.7	101299	62857.2	0.433065	0.0357949
methylmalonate-semialdehyde dehydrogenase [acylating], mitochondrial isoform X1 [Phalaenopsis equestris]	15	2	XP_020589275.1	AT2G14170	mitochondrion	87447.2	46475.5	33412.5	25686.9	2.6172	0.00943437
dihydropyrimidine dehydrogenase (NADP(+)), chloroplastic [Dendrobium catenatum]	15	2	XP_020680850.1	AT3G17810	plastid	31716	22879.7	55172.2	23527	0.574856	0.0620722
omega-amidase, chloroplastic [Phalaenopsis equestris]	15	2	XP_020584439.1	AT5G12040	plastid	71291.1	45881.4	41012.2	16871.2	1.73829	0.103671
Glyceraldehyde-3-phosphate dehydrogenase A, chloroplastic OS=Arabidopsis thaliana GN=GAPA PE=1 SV=3	15	2	P25856	AT3G26650	plastid	33531.2	13641.2	57995.5	83392.9	0.578169	0.502508
ruvB-like protein 1 [Phalaenopsis equestris]	15	2	XP_020598868.1	AT5G22330	nucleus	39609	38025.7	74788.5	40343.9	0.529613	0.0944383
aminomethyltransferase, mitochondrial [Dendrobium catenatum]	15	2	XP_020688659.1	AT1G11860	mitochondrion	80372.6	78967.7	64312	32841	1.24973	0.59646
Allene oxide synthase OS=Parthenium argentatum GN=CYP74A2 PE=1 SV=2	15	2	Q40778	AT5G42650	plastid	61588.2	26533.7	50165.4	31148.8	1.2277	0.459236
bifunctional epoxide hydrolase 2 [Dendrobium catenatum]	15	2	XP_020691480.1	AT4G02340	peroxisome	105573	35682	130429	34189.4	0.809433	0.175615
probable protein phosphatase 2C 62 isoform X1 [Dendrobium catenatum]	15	2	XP_020690498.1	AT4G28400	plasma membrane	37869.1	18878.5	48477	15236.3	0.781176	0.231495
eukaryotic translation initiation factor 5A-2-like [Phalaenopsis equestris]	15	2	XP_020572986.1	AT1G13950	cytosol	92265.7	16284.2	94749.2	28956.7	0.973788	0.84068
2-Cys peroxiredoxin BAS1, chloroplastic [Dendrobium catenatum]	15	2	XP_020696045.1	AT3G11630	plastid	87997.6	36129.4	87830.3	31047.8	1.00191	0.993027
coatomer subunit delta-2 isoform X1 [Dendrobium catenatum]	15	2	XP_020691319.1	AT5G05010	golgi	99027.8	102614	194231	114680	0.509846	0.103162
fructose-bisphosphate aldolase 3, chloroplastic [Dendrobium catenatum]	14	2	XP_020679007.1	AT2G01140	plastid	97309.8	99863	17914.7	22111.5	4.063	0.00493006
granule-bound starch synthase 1b, chloroplastic/amyloplastic [Dendrobium catenatum]	14	2	XP_028549213.1	AT1G32900	plastid	115370	59734	438489	321547	0.263109	0.0177036
2,3-bisphosphoglycerate-independent phosphoglycerate mutase 1 OS=Arabidopsis thaliana GN=PGM1 PE=2 SV=3	14	2	O04499	AT1G09780	cytosol	26205.9	13612.2	35670.4	29912.4	0.734667	0.477365
glucose-6-phosphate isomerase 1, chloroplastic isoform X1 [Phalaenopsis equestris]	14	2	XP_020597242.1	AT4G24620	plastid	50205.6	31542.1	53148.2	31367	0.944634	0.879087
succinate dehydrogenase [ubiquinone] iron-sulfur subunit 1, mitochondrial-like [Phalaenopsis equestris]	14	2	XP_020584652.1	AT5G40650	mitochondrion	88493.2	51502.3	90117	43744.1	0.981982	0.948469
Enoyl-[acyl-carrier-protein] reductase [NADH] 1, chloroplastic OS=Oryza sativa subsp. japonica GN=Os08g0327400 PE=2 SV=1	14	2	Q6Z0I4	AT2G05990	plastid	62205	46672.5	67567.2	96877.8	0.920639	0.893867
uncharacterized protein LOC110115501 isoform X1 [Dendrobium catenatum]	14	2	XP_020704418.1	AT1G69510	nucleus	55735.6	36783.1	114084	80095.1	0.488551	0.0912464
eukaryotic peptide chain release factor subunit 1-3 [Phalaenopsis equestris]	14	2	XP_020582878.1	AT3G26618	cytosol	49862.4	4599.23	77956.2	27192.6	0.639622	0.0146634
60S ribosomal protein L7-4 OS=Arabidopsis thaliana GN=RPL7D PE=2 SV=1	14	2	Q9LHP1	AT3G13580	cytosol	80268.9	42945.2	72826.1	27592.3	1.1022	0.680318
40S ribosomal protein S18 OS=Arabidopsis thaliana GN=RPS18A PE=1 SV=1	14	2	P34788	AT1G34030	cytosol	21307.6	0	51236	27073.4	0.415872	N/A
thioredoxin H1 [Dendrobium catenatum]	14	2	XP_020697631.1	AT3G51030	cytosol	100000	49630.5	139551	60788.4	0.716584	0.180255
polyadenylate-binding protein RBP45-like [Phalaenopsis equestris]	14	2	XP_020593973.1	AT1G11650	cytosol	38294.6	14553.4	43513.2	11450.4	0.880068	0.433897
2-alkenal reductase (NADP(+)-dependent)-like [Phalaenopsis equestris]	13	2	XP_020584469.1	AT5G16990	cytosol	46591.8	30576.7	30204.2	12585.3	1.54256	0.210868
Heat shock protein 83 OS=Ipomoea nil GN=HSP83A PE=2 SV=1	13	2	P51819	AT5G52640	cytosol	15929.5	0	27457.6	26443.2	N/A	N/A
allene oxide synthase 2 [Dendrobium catenatum]	13	2	XP_020691918.1	AT5G42650	plastid	79764.8	17809.8	63772.1	28436.1	1.25078	0.209209
Nucleoside diphosphate kinase 1 OS=Saccharum officinarum GN=NDPK1 PE=1 SV=1	13	2	P93554	AT4G09320	cytosol	58036	39751.3	102240	78732.7	0.567645	0.502403
gamma carbonic anhydrase 1, mitochondrial-like [Phalaenopsis equestris]	13	2	XP_020585828.1	AT1G19580	mitochondrion	80856.8	32949.2	65885.4	30395.4	1.22723	0.393125
dolichyl-diphosphooligosaccharide--protein glycosyltransferase 48 kDa subunit isoform X1 [Phalaenopsis equestris]	13	2	XP_020578403.1	AT5G66680	endoplasmic reticulum	40345.1	16358.9	39009.4	23419.7	1.03424	0.900979
ran-binding protein 1 homolog a-like [Phalaenopsis equestris]	13	2	XP_020596794.1	AT5G58590	nucleus	66257.1	36685.5	51326.1	33108.2	1.29091	0.42399
triosephosphate isomerase, chloroplastic isoform X1 [Dendrobium catenatum]	12	2	XP_020689003.1	AT2G21170	plastid	9306.83	4254.98	19803.8	11512.6	0.469951	0.131646
glyceraldehyde-3-phosphate dehydrogenase A, chloroplastic [Phalaenopsis equestris]	12	2	XP_020592944.1	AT1G12900	plastid	25569.6	5620.71	9451.08	0	2.70547	9.45192e-08
NAD-dependent malic enzyme 59 kDa isoform, mitochondrial OS=Solanum tuberosum PE=1 SV=1	12	2	P37225	AT4G00570	mitochondrion	31838.5	23476.7	34807.6	9780.3	0.9147	0.736949
Citrate synthase, mitochondrial OS=Daucus carota GN=CS PE=2 SV=1	12	2	O80433	AT2G44350	mitochondrion	119383	98652.8	87695.1	41225.6	1.36134	0.514349
LOW QUALITY PROTEIN: dihydrolipoyllysine-residue succinyltransferase component of 2-oxoglutarate dehydrogenase complex 2, mitochondrial-like [Phalaenopsis equestris]	12	2	XP_020579389.1	AT4G26910	mitochondrion	166270	71675.7	172769	194526	0.962389	0.956938
Ferredoxin--nitrite reductase, chloroplastic OS=Arabidopsis thaliana GN=NIR1 PE=1 SV=1	12	2	Q39161	AT2G15620	plastid	39744.3	31436.8	58616.2	34705.8	0.678043	0.289261
aspartyl protease AED3-like [Dendrobium catenatum]	12	2	XP_020700196.1	AT5G07030	extracellular	39600	18844.5	95008.9	67782.1	0.416803	0.0409972
peroxidase 5-like [Dendrobium catenatum]	12	2	XP_020698041.1	AT1G05260	extracellular	126241	102611	40489.8	19446.1	3.11785	0.257866
transcription factor Pur-alpha 1-like isoform X1 [Phalaenopsis equestris]	12	2	XP_020578939.1	AT2G32080	golgi	42394	21728.6	49523.9	34321	0.856032	0.68076
non-specific lipid-transfer protein-like 1 [Phalaenopsis equestris]	12	2	XP_020583272.1	AT5G42890	peroxisome	32336.3	14545.8	45702.6	24061.9	0.707537	0.307003
Triosephosphate isomerase, cytosolic OS=Oryza sativa subsp. japonica GN=TPI PE=1 SV=3	11	2	P48494	AT3G55440	cytosol	28128.4	17089	0	NA	100	2.32367e-16
Dihydrolipoyl dehydrogenase, mitochondrial OS=Pisum sativum GN=LPD PE=1 SV=2	11	2	P31023	AT1G48030	mitochondrion	70595.6	26491.9	99409.2	19861.6	0.710151	0.0294723
1-deoxy-D-xylulose 5-phosphate reductoisomerase, chloroplastic isoform X1 [Dendrobium catenatum]	11	2	XP_020678184.1	AT5G62790	plastid	42388.6	24115.9	41389.2	17006.3	1.02415	0.941101
erlin-2-B isoform X1 [Dendrobium catenatum]	11	2	XP_020678522.1	AT2G03510	endoplasmic reticulum	50805.9	30147.6	58501.6	18672.4	0.868453	0.675735
fasciclin-like arabinogalactan protein 8 [Phalaenopsis equestris]	11	2	XP_020598416.1	AT2G45470	plasma membrane,extracellular	108875	109936	82281.2	112038	1.3232	0.716967
proteasome subunit beta type-3 [Phalaenopsis equestris]	11	2	XP_020573034.1	AT1G21720	nucleus,cytosol	47518.9	23043.3	41155.7	13134.9	1.15461	0.537771
nucleolin-like [Phalaenopsis equestris]	11	2	XP_020582085.1	AT2G44710	nucleus	47301.3	19292.1	41033.5	32700.1	1.15275	0.753368
40S ribosomal protein S25 [Phalaenopsis equestris]	11	2	XP_020596697.1	AT4G39200	nucleus,cytosol	57912.2	30856.2	80774.5	38192.8	0.716962	0.236725
peroxiredoxin-2C [Dendrobium catenatum]	11	2	XP_020671916.1	AT1G65980	cytosol	411247	230022	382558	142166	1.07499	0.77728
S-adenosylmethionine synthase 2 OS=Brassica juncea GN=MSAMS2 PE=2 SV=1	10	2	Q9FUZ1	AT3G17390	plasma membrane,nucleus	42077.9	19701.6	27358.6	22843.4	1.53801	0.5598
glutamine synthetase cytosolic isozyme 1-1 [Phalaenopsis equestris]	10	2	XP_020584530.1	AT5G37600	cytosol	41281.3	17779.6	42466.5	21557.7	0.97209	0.949168
Phosphoglycerate kinase 1, chloroplastic OS=Arabidopsis thaliana GN=PGK1 PE=1 SV=1	10	2	Q9LD57	AT3G12780	plastid	0	NA	126272	0	0.01	2.32367e-16
alpha-amylase isozyme 3D [Dendrobium catenatum]	10	2	XP_020691788.1	AT4G25000	extracellular	4491.88	0	78321.6	53447	0.0573517	0.000444657
proliferating cell nuclear antigen [Phalaenopsis equestris]	10	2	XP_020591927.1	AT2G29570	nucleus	44444.6	27740.3	48515	30798.2	0.916099	0.861091
ATP synthase subunit gamma, mitochondrial OS=Ipomoea batatas GN=ATPC PE=1 SV=2	10	2	P26360	AT2G33040	mitochondrion	78204.7	80648.9	133953	107890	0.583822	0.26886
glutathione reductase, chloroplastic [Phalaenopsis equestris]	10	2	XP_020586103.1	AT3G54660	plastid	40464.3	25448.5	58618.9	26358.8	0.690294	0.297775
serine/arginine-rich splicing factor RSZ21A [Dendrobium catenatum]	10	2	XP_020678707.1	AT1G23860	nucleus	48891.4	22367.3	43239.2	31217.1	1.13072	0.689749
protein TIC 40, chloroplastic isoform X1 [Dendrobium catenatum]	10	2	XP_020681903.1	AT5G16620	plastid	42261.8	18350.1	46980.6	26892.4	0.89956	0.715403
probable N-acetyl-gamma-glutamyl-phosphate reductase, chloroplastic, partial [Phalaenopsis equestris]	9	2	XP_020583292.1	AT2G19940	plastid	38974.7	13218.1	52917.6	35959.5	0.736516	0.448683
fructose-1,6-bisphosphatase, chloroplastic [Dendrobium catenatum]	9	2	XP_020702562.1	AT3G54050	plastid	60258.5	50424.3	19140.8	10147.4	3.14818	0.131845
fructose-bisphosphate aldolase, chloroplastic [Dendrobium catenatum]	9	2	XP_020693401.1	AT4G38970	plastid	88975.4	59114.6	92057.8	41094.7	0.966517	0.920981
pirin-like protein isoform X1 [Dendrobium catenatum]	9	2	XP_020694938.1	AT2G43120	mitochondrion	59065.3	23909.5	32427.7	14684.1	1.82145	0.0145824
alcohol dehydrogenase 1B-like [Dendrobium catenatum]	9	2	XP_020682027.1	AT5G63620	mitochondrion	25542.7	16726.1	24486.6	10514.2	1.04313	0.900002
Glycine dehydrogenase [decarboxylating], mitochondrial OS=Pisum sativum GN=GDCSP PE=1 SV=1	9	2	P26969	AT4G33010	mitochondrion	22606.4	6966.28	25573.8	14669	0.883969	0.709589
uncharacterized protein LOC110112429 [Dendrobium catenatum]	9	2	XP_020700310.1	AT4G19880	plastid	40951.7	24916.9	40475.9	16297.6	1.01176	0.966867
40S ribosomal protein S2-3-like [Dendrobium catenatum]	9	2	XP_020697453.1	AT3G57490	cytosol	31646.7	20792.5	33074.4	13558.4	0.956833	0.918422
Transketolase, chloroplastic OS=Zea mays PE=1 SV=1	8	2	Q7SIC9	AT3G60750	plastid	344580	116034	273329	106458	1.26068	0.219489
uncharacterized protein LOC110115525 [Dendrobium catenatum]	8	2	XP_020704446.2	AT4G33680	plastid	29859.3	15465.1	26634.7	15575.7	1.12107	0.70568
Glucose-1-phosphate adenylyltransferase large subunit 2, chloroplastic/amyloplastic OS=Solanum tuberosum GN=AGPS2 PE=2 SV=1	8	2	P55242	AT1G27680	plastid	87991.3	70275.4	69743.1	47434.6	1.26165	0.638144
beta-glucosidase 2-like isoform X1 [Phalaenopsis equestris]	8	2	XP_020575450.1	AT1G02850	extracellular	48925.5	34318.2	62228.6	86166.9	0.786222	0.706364
probable ATP synthase 24 kDa subunit, mitochondrial [Phalaenopsis equestris]	8	2	XP_020577582.1	AT2G21870	mitochondrion	49527.2	40550.9	97004.5	46534.4	0.510566	0.19275	-0.779104	2.19698
PITH domain-containing protein At3g04780 [Dendrobium catenatum]	8	2	XP_028548635.1	AT3G04780	cytosol	38721.1	9715.92	47552.6	22834.6	0.814278	0.690918
ATP synthase subunit alpha, chloroplastic OS=Aethionema grandiflora GN=atpA PE=3 SV=1	8	2	A4QJI4	ATCG00120	plastid	33586	27103.7	58408	0	0.575024	N/A
ATP-dependent Clp protease ATP-binding subunit CLPT1, chloroplastic-like [Phalaenopsis equestris]	8	2	XP_020573937.1	AT4G25370	plastid	79090.9	31754.4	38747.2	27730.4	2.0412	0.261721
phytepsin-like isoform X1 [Phalaenopsis equestris]	8	2	XP_020593223.1	AT1G11910	vacuole	25121.7	13262.7	29166.7	16490.9	0.861315	0.723301
small ubiquitin-related modifier 1 [Phalaenopsis equestris]	8	2	XP_020589525.1	AT4G26840	nucleus	38802.5	14240.9	60636.1	22745	0.639924	0.208432
uncharacterized protein LOC110018614 [Phalaenopsis equestris]	8	2	XP_020571636.1	AT5G55200	mitochondrion	39179.4	20155.8	25884.7	11131.3	1.51361	0.139019
probable LL-diaminopimelate aminotransferase, chloroplastic [Phalaenopsis equestris]	7	2	XP_020586075.1	AT4G33680	plastid	44095.4	44026.3	79398.6	87441.1	0.555367	0.356228
2-isopropylmalate synthase A-like [Phalaenopsis equestris]	7	2	XP_020589067.1	AT1G74040	plastid	43679.8	40709.8	37155.5	51672.5	1.17559	0.825464
probable mannose-1-phosphate guanylyltransferase 1 [Phalaenopsis equestris]	7	2	XP_020581066.1	AT2G39770	cytosol	31066	5468.01	55380.5	74279.4	0.560956	0.620763
putative germin-like protein 2-1 [Phalaenopsis equestris]	7	2	XP_020586482.1	AT5G39160	extracellular	29095.8	17610.5	47949.6	34256.9	0.6068	0.339911
leucine-rich repeat extensin-like protein 3 [Dendrobium catenatum]	7	2	XP_020692897.1	AT3G24480	extracellular	56548.3	21538.6	45345.1	16114.3	1.24706	0.360128
WD-40 repeat-containing protein MSI4 [Phalaenopsis equestris]	7	2	XP_020577282.1	AT2G19520	nucleus	15273.6	3561.2	34490.3	17400.3	0.442837	0.0101275
malate synthase, glyoxysomal [Dendrobium catenatum]	7	2	XP_020697256.1	AT5G03860	peroxisome	37657.3	16669.3	37827	21066.2	0.995513	0.988579
ankyrin repeat domain-containing protein 2A-like [Phalaenopsis equestris]	7	2	XP_020586392.1	AT4G35450	cytosol	46534.3	31484.5	57100.6	37337	0.814953	0.582998
4-hydroxy-3-methylbut-2-en-1-yl diphosphate synthase (ferredoxin), chloroplastic [Dendrobium catenatum]	7	2	XP_028557198.1	AT5G60600	plastid	35609.9	20347.9	27304	9165.43	1.3042	0.314262
photosystem II 47 kDa protein (chloroplast) [Dendrobium catenatum]	7	2	YP_009472290.1	ATCG00680	plastid	40197.8	21129.6	90595.7	68458.2	0.443705	0.3241
ubiquitin fusion degradation protein 1 homolog isoform X1 [Dendrobium catenatum]	7	2	XP_028555524.1	AT2G21270	cytosol	20079.5	14651	48812.6	24319.2	0.411358	0.18576
eukaryotic translation initiation factor 3 subunit I-like [Phalaenopsis equestris]	7	2	XP_020599937.1	AT2G46290	cytosol	29770.9	14815.3	32890.5	17954.5	0.905153	0.844224
la protein 1 [Dendrobium catenatum]	7	2	XP_020697582.1	AT4G32720	nucleus	0	NA	29946.6	10991.4	0.01	2.32367e-16
coatomer subunit gamma-2 [Phalaenopsis equestris]	7	2	XP_020572866.1	AT4G34450	cytosol	52726.8	52076.5	44537.1	47320.5	1.18388	0.827117
diaminopimelate decarboxylase 1, chloroplastic-like [Phalaenopsis equestris]	6	2	XP_020582560.1	AT3G14390	plastid	43638.8	13408.7	51697.6	25246.8	0.844115	0.626694
LOW QUALITY PROTEIN: probable beta-D-xylosidase 6 [Dendrobium catenatum]	6	2	XP_028555812.1	AT5G10560	extracellular	82813.7	0	48557.4	31973.7	1.70548	N/A
L-ascorbate oxidase homolog [Phalaenopsis equestris]	6	2	XP_020577573.1	AT1G76160	extracellular	16817.9	16532.8	32817.8	27664.4	0.512462	0.416879
Peptidyl-prolyl cis-trans isomerase CYP20-3, chloroplastic OS=Arabidopsis thaliana GN=CYP20-3 PE=1 SV=1	6	2	P34791	AT3G62030	plastid	0	NA	45480.4	50062.3	0.01	2.32367e-16
mitochondrial proton/calcium exchanger protein [Dendrobium catenatum]	6	2	XP_020676836.1	AT1G65540	mitochondrion	33978	3575.3	36799	12699.5	0.92334	0.813773
basic leucine zipper and W2 domain-containing protein 2-like [Phalaenopsis equestris]	6	2	XP_020598791.1	AT5G36230	cytosol	40403.5	11242.2	41636.9	22986.1	0.970377	0.956114
LOW QUALITY PROTEIN: long chain base biosynthesis protein 2d-like [Phalaenopsis equestris]	5	2	XP_020587786.1	AT5G23670	endoplasmic reticulum	17496.7	2699.24	20318.8	12506.3	0.861107	0.727815
Peptidyl-prolyl cis-trans isomerase CYP19-4 OS=Arabidopsis thaliana GN=CYP19-4 PE=1 SV=2	5	2	Q8LDP4	AT2G29960	endoplasmic reticulum	129250	118314	355452	211938	0.376	0.0250556
protein disulfide isomerase-like 2-3 [Dendrobium catenatum]	5	2	XP_020683361.1	AT1G04980	endoplasmic reticulum	43794	33197.5	30934.8	12935.5	1.41569	0.490946
eukaryotic translation initiation factor 5-like [Phalaenopsis equestris]	5	2	XP_020592283.1	AT1G77840	cytosol	24838.4	17516.2	31002	26326.2	0.801188	0.671835
50S ribosomal protein L12, chloroplastic-like [Phalaenopsis equestris]	5	2	XP_020574112.1	AT3G27850	plastid	44323.9	13693.9	4691.35	0	9.44802	2.88969e-08
40S ribosomal protein S19-3 OS=Arabidopsis thaliana GN=RPS19C PE=2 SV=1	5	2	Q9FNP8	AT5G61170	cytosol	7649.06	0	22486.1	23400.7	N/A	N/A
calcium-dependent protein kinase 1 [Dendrobium catenatum]	5	2	XP_020700773.1	AT4G23650	cytosol	23338.3	15100	28723.4	16999.1	0.812518	0.604471
coatomer subunit alpha-3-like [Dendrobium catenatum]	5	2	XP_020684539.1	AT1G62020	cytosol	26718.9	21875.6	22698.7	20675.6	1.17712	0.810429
Translationally-controlled tumor protein homolog OS=Solanum tuberosum GN=TCTP PE=2 SV=2	4	2	P43349	AT3G16640	cytosol	160764	112788	180006	157465	0.893103	0.7873
delta-aminolevulinic acid dehydratase, chloroplastic [Dendrobium catenatum]	4	2	XP_020695923.1	AT1G69740	plastid	58777.2	6625.03	44381.3	11643.4	1.32437	0.306903
photosystem I subunit VII (chloroplast) [Dendrobium catenatum]	4	2	YP_009472313.1	ATCG01060	plastid	3939.76	940.173	26253.4	33894.5	0.150066	0.361637
probable protein phosphatase 2C 11 [Dendrobium catenatum]	4	2	XP_020701203.1	AT4G31860	cytosol	23300.1	6037.07	21514.8	9810.02	1.08298	0.856593
signal recognition particle 14 kDa protein [Dendrobium catenatum]	4	2	XP_020704007.1	AT2G43640	nucleus	36104.7	25971.9	24403	14639.3	1.47952	0.409812
40S ribosomal protein S7 [Dendrobium catenatum]	4	2	XP_020686595.2	AT1G48830	cytosol	28153.9	11975.1	43881	17846.8	0.641597	0.0610367
probable calcium-binding protein CML7 [Dendrobium catenatum]	4	2	XP_020686612.1	AT1G12310	cytosol	28183.5	11626.2	36390.6	20478.7	0.774472	0.414712
aquaporin PIP2-7-like [Dendrobium catenatum]	4	2	XP_020690101.1	AT5G60660	plasma membrane	45964.9	63044	20250.1	19506.8	2.26986	0.49939
coatomer subunit beta'-1 isoform X1 [Dendrobium catenatum]	4	2	XP_020692898.1	AT1G52360	cytosol	17510.2	5122.9	16028.4	8962.37	1.09245	0.758251
V-type proton ATPase subunit a3 [Dendrobium catenatum]	4	2	XP_020691500.1	AT4G39080	vacuole	31139.8	18131.2	34248.5	21549.5	0.909231	0.773412
UDP-D-apiose/UDP-D-xylose synthase 2 [Dendrobium catenatum]	3	2	XP_020683660.1	AT1G08200	cytosol	18739.3	10656.3	29319.3	24405.4	0.639144	0.475428
pyrophosphate--fructose 6-phosphate 1-phosphotransferase subunit alpha [Phalaenopsis equestris]	3	2	XP_020583951.1	AT1G76550	cytosol	17749.4	2369.33	17517.6	3330.34	1.01324	0.946194
stomatin-like protein 2, mitochondrial isoform X1 [Phalaenopsis equestris]	3	2	XP_020591395.1	AT4G27585	mitochondrion	14057.3	8322.44	0	NA	100	2.32367e-16
Peptidyl-prolyl cis-trans isomerase CYP18-4 OS=Arabidopsis thaliana GN=CYP18-4 PE=1 SV=1	3	2	Q42406	AT4G34870	cytosol	17929.8	14513.3	38368.4	31510.1	0.467307	0.47177
60S ribosomal protein L19-3-like [Phalaenopsis equestris]	3	2	XP_020585829.1	AT1G02780	cytosol	19430.8	1281.47	33683.4	13509.3	0.576868	0.291008
serine/threonine-protein phosphatase PP2A catalytic subunit isoform X2 [Phalaenopsis equestris]	3	2	XP_020582662.1	AT3G58500	cytosol	25011.7	14785.7	12633.8	7224.81	1.97974	0.0763103
basic transcription factor 3 [Dendrobium catenatum]	3	2	XP_020699508.1	AT1G17880	nucleus	11053.3	524.187	15611.6	2258.28	0.708019	0.0829432
sm-like protein LSM5 [Phalaenopsis equestris]	3	2	XP_020576266.1	AT5G48870	cytosol	50595.1	24929.2	44762.9	44947.3	1.13029	0.854838
glutamate--glyoxylate aminotransferase 2 [Dendrobium catenatum]	2	2	XP_020698310.1	AT1G23310	peroxisome	15787.5	0	0	NA	N/A	N/A
Probable rhamnose biosynthetic enzyme 1 OS=Arabidopsis thaliana GN=RHM1 PE=1 SV=1	2	2	Q9SYM5	AT1G78570	cytosol	17816.5	6003.5	2.76972e+06	1.51477e+06	0.00643258	3.89486e-06
LOW QUALITY PROTEIN: elongation factor G-2, chloroplastic [Dendrobium catenatum]	2	2	XP_020675890.2	AT1G62750	plastid	17241	9696.11	17518.6	10705.2	0.984153	0.97563
40S ribosomal protein S11 OS=Euphorbia esula GN=RPS11 PE=2 SV=1	2	2	Q9M5M1	AT5G23740	cytosol	13371.2	30.6056	28005	10632.7	0.477457	0.187215
patellin-3 [Dendrobium catenatum]	2	2	XP_020673319.1	AT4G09160	nucleus	73499.1	12509.9	68706	38025.1	1.06976	0.894118
probable V-type proton ATPase subunit d [Phalaenopsis equestris]	2	2	XP_020596738.1	AT3G28715	vacuole	15769.3	7276.73	15734.7	2161.44	1.0022	0.99575
heat shock cognate 70 kDa protein 2 [Dendrobium catenatum]	585	1	XP_020694708.1	AT3G12580	cytosol	19619.5	5092.05	15083	8319.38	1.30077	0.393949
ribulose-1,5-bisphosphate carboxylase/oxygenase large subunit (chloroplast) [Phalaenopsis equestris]	331	1	YP_006073273.1	ATCG00490	plastid	824547	661184	204518	209841	4.03165	0.0180157
ribulose-1,5-bisphosphate carboxylase/oxygenase large subuni (chloroplast) [Dendrobium catenatum]	301	1	YP_009472272.1	ATCG00490	plastid	19437.7	12511.1	23958.4	5783.99	0.811309	0.666879
actin-7-like [Phalaenopsis equestris]	285	1	XP_020592572.1	AT5G09810	cytosol	2.71353e+06	1.38981e+06	3.30826e+06	1.31111e+06	0.820229	0.393044
phospholipase D alpha 1 [Dendrobium catenatum]	272	1	XP_020690474.2	AT3G15730	cytosol	406087	113836	416435	153257	0.975151	0.882658
heat shock protein 81-1-like [Phalaenopsis equestris]	268	1	XP_020584290.1	AT5G56010	cytosol	66238.7	30374	94447	73988.9	0.701332	0.459561
actin-7 [Dendrobium catenatum]	264	1	XP_020698547.1	AT5G09810	cytosol	255620	93646.1	431416	167777	0.592514	0.0236783
elongation factor 2 [Phalaenopsis equestris]	253	1	XP_020593918.1	AT1G56070	cytosol	52108.3	44868.7	38447.9	27974.1	1.3553	0.516393
alcohol dehydrogenase 1 [Dendrobium catenatum]	241	1	XP_020680992.1	AT1G77120	cytosol	30554.1	13575.5	41668.3	18131	0.733271	0.216235
probable aldo-keto reductase 2 [Phalaenopsis equestris]	238	1	XP_020575191.1	AT1G60690	cytosol	3.47967e+06	2.09139e+06	3.68172e+06	767175	0.945121	0.793264
Glyceraldehyde-3-phosphate dehydrogenase, cytosolic OS=Pisum sativum GN=GAPC1 PE=2 SV=1	214	1	P34922	AT3G04120	nucleus,cytosol	6.82912e+06	7.83779e+06	4.56697e+06	3.16633e+06	1.49533	0.444366
actin-97-like [Phalaenopsis equestris]	199	1	XP_020575884.1	AT5G09810	cytosol	33619.6	4255.29	33110	21182.3	1.01539	0.979374
ATP synthase subunit alpha, mitochondrial OS=Beta vulgaris GN=ATPA PE=3 SV=1	193	1	Q06735	ATMG01190	mitochondrion	277776	105367	292584	102929	0.949388	0.780836
ATP synthase subunit alpha, mitochondrial OS=Pisum sativum GN=ATPA PE=3 SV=2	192	1	P05493	ATMG01190	mitochondrion	118777	52409.8	100338	75514.6	1.18376	0.71383
Glyceraldehyde-3-phosphate dehydrogenase 2, cytosolic OS=Oryza sativa subsp. japonica GN=GAPC2 PE=1 SV=1	184	1	Q7FAH2	AT1G13440	nucleus,cytosol	1.90846e+06	776306	2.10835e+06	750365	0.905189	0.609223
Beta-glucosidase 17 OS=Arabidopsis thaliana GN=BGLU17 PE=2 SV=1	180	1	O64882	AT2G44480	vacuole	7.88393e+06	3.73394e+06	4.88192e+06	3.17333e+06	1.61492	0.101475
Ribulose bisphosphate carboxylase large chain OS=Arabidopsis thaliana GN=rbcL PE=1 SV=1	176	1	O03042	ATCG00490	plastid	2.80189e+06	2.13819e+06	2.94495e+06	1.84011e+06	0.951421	0.887495
Glyceraldehyde-3-phosphate dehydrogenase, cytosolic OS=Dianthus caryophyllus GN=GAPC PE=3 SV=1	148	1	P34921	AT1G13440	nucleus,cytosol	33820.5	9879.78	171405	0	0.197313	N/A
14-3-3-like protein [Dendrobium catenatum]	148	1	XP_028549014.1	AT5G38480	cytosol	1.82726e+06	1.00778e+06	2.05348e+06	1.17609e+06	0.889839	0.689329
LOW QUALITY PROTEIN: chaperonin CPN60-2, mitochondrial-like [Dendrobium catenatum]	141	1	XP_028547748.1	AT3G23990	mitochondrion	33745.4	0	30690.4	13907.5	1.09954	N/A
tubulin alpha-4 chain isoform X1 [Dendrobium catenatum]	133	1	XP_020680367.1	AT1G50010	cytosol	30070	34235.3	125906	106624	0.238828	0.0450417
14-3-3-like protein [Dendrobium catenatum]	125	1	XP_020675701.1	AT5G38480	cytosol	185361	60408.9	229872	102814	0.806364	0.322004
Ribulose bisphosphate carboxylase large chain (Fragment) OS=Antirhea lucida GN=rbcL PE=3 SV=1	120	1	Q31672	ATCG00490	plastid	28876	15642.5	800788	774099	0.0360595	0.0310402
Beta-glucosidase 29 OS=Oryza sativa subsp. japonica GN=BGLU29 PE=2 SV=2	117	1	A3C053	AT2G44480	vacuole	55929.9	29658.5	31108.2	11396.3	1.79791	0.045254
ATP synthase subunit alpha, mitochondrial OS=Arabidopsis thaliana GN=ATPA PE=1 SV=2	115	1	P92549	ATMG01190	mitochondrion	72918.7	46108.5	61882.9	17627.7	1.17833	0.535751
Beta-glucosidase 26 OS=Oryza sativa subsp. japonica GN=BGLU26 PE=1 SV=1	114	1	A3BMZ5	AT3G18080	extracellular	15735.8	6814.84	31137.2	13998.3	0.505369	0.0229875
Probable inactive beta-glucosidase 25 OS=Arabidopsis thaliana GN=BGLU25 PE=2 SV=1	110	1	O82772	AT3G03640	extracellular	17781.8	7934.56	13465.2	7019.76	1.32057	0.299341
glucose-6-phosphate 1-dehydrogenase, cytoplasmic isoform isoform X1 [Dendrobium catenatum]	110	1	XP_020689210.1	AT5G40760	cytosol	655296	202712	764838	258174	0.856778	0.368239
tubulin alpha chain [Dendrobium catenatum]	106	1	XP_020677770.1	AT1G50010	cytosol	368006	234060	327783	282328	1.12271	0.764171
sucrose synthase 4-like [Phalaenopsis equestris]	102	1	XP_020583369.1	AT4G02280	mitochondrion	90924.9	120723	189020	223770	0.481034	0.508646
Glyceraldehyde-3-phosphate dehydrogenase, cytosolic OS=Petroselinum crispum GN=GAPC PE=2 SV=1	100	1	P26519	AT3G04120	nucleus,cytosol	0	NA	17845.6	6965.68	0.01	2.32367e-16
pyruvate kinase 1, cytosolic [Phalaenopsis equestris]	100	1	XP_020581436.1	AT3G52990	cytosol	65049.8	29065.9	57269.5	21367.5	1.13585	0.546212
Elongation factor 1-alpha OS=Triticum aestivum GN=TEF1 PE=2 SV=1	99	1	Q03033	AT5G60390	cytosol	170331	49994.1	240010	87994.8	0.709683	0.0780851
clathrin heavy chain 1 [Dendrobium catenatum]	97	1	XP_020694024.1	AT3G11130	plasma membrane	19534.1	9362.33	15396.2	8281.41	1.26877	0.626636
glucose-6-phosphate 1-dehydrogenase, cytoplasmic isoform-like [Phalaenopsis equestris]	95	1	XP_020571869.1	AT5G40760	cytosol	0	NA	19762.5	0	N/A	N/A
aconitate hydratase, cytoplasmic-like isoform X1 [Phalaenopsis equestris]	92	1	XP_020574160.1	AT2G05710	mitochondrion	102260	62080.8	135295	48565.6	0.755827	0.249806
chaperone protein ClpC1, chloroplastic [Dendrobium catenatum]	90	1	XP_020699467.1	AT5G50920	plastid	30151.9	21116.8	46366.4	10597.3	0.650296	0.1897
probable fructokinase-1 isoform X1 [Phalaenopsis equestris]	84	1	XP_020597391.1	AT2G31390	cytosol	85297.4	31224.2	94895.9	48867.4	0.898853	0.655393
aconitate hydratase 3, mitochondrial-like isoform X1 [Dendrobium catenatum]	84	1	XP_028556303.1	AT2G05710	mitochondrion	96649.8	39539.4	99935.9	40330.1	0.967118	0.872276
phosphoglycerate kinase, chloroplastic, partial [Phalaenopsis equestris]	83	1	XP_020588716.1	AT1G56190	plastid	70665.2	0	48713	0	1.45064	N/A
annexin D1-like [Phalaenopsis equestris]	81	1	XP_020589921.1	AT1G35720	peroxisome	572194	193268	582714	192734	0.981946	0.915059
aconitate hydratase, cytoplasmic-like, partial [Phalaenopsis equestris]	80	1	XP_020581750.1	AT2G05710	mitochondrion	46958.8	25702.8	45025	20348	1.04295	0.868711
LOW QUALITY PROTEIN: probable linoleate 9S-lipoxygenase 5 [Phalaenopsis equestris]	78	1	XP_020574744.1	AT1G55020	golgi	93013	45413	103624	71053.5	0.897604	0.744135
Linoleate 9S-lipoxygenase A OS=Solanum lycopersicum GN=LOX1.1 PE=2 SV=1	77	1	P38415	AT1G55020	golgi	1.68657e+06	649557	1.74445e+06	1.52033e+06	0.966817	0.925616
malate dehydrogenase, chloroplastic [Phalaenopsis equestris]	76	1	XP_020572787.1	AT3G47520	plastid	31925.3	7498.26	39139.1	15716.1	0.81569	0.276859
citrate synthase, glyoxysomal [Dendrobium catenatum]	76	1	XP_020680128.1	AT3G58750	peroxisome	16329.7	927.753	19061.5	6681.4	0.856687	0.614341
26S proteasome regulatory subunit S10B homolog B [Dendrobium catenatum]	76	1	XP_020680896.1	AT1G45000	nucleus,cytosol	37052.3	6931.23	42292.2	28317.2	0.876101	0.81188
Heat shock 70 kDa protein OS=Zea mays GN=HSP70 PE=3 SV=2	75	1	P11143	AT3G12580	cytosol	231988	61931.9	274083	67613.8	0.846413	0.217332
Heat shock cognate 70 kDa protein OS=Petunia hybrida GN=HSP70 PE=2 SV=1	75	1	P09189	AT3G12580	cytosol	83485.5	37116.1	78245.7	43202.8	1.06697	0.800868
Heat shock cognate 70 kDa protein 2 OS=Solanum lycopersicum GN=HSC-2 PE=2 SV=1	73	1	P27322	AT3G12580	cytosol	46266.7	21758.5	43417.2	32949.1	1.06563	0.864865
Chaperonin CPN60-2, mitochondrial OS=Cucurbita maxima GN=CPN60-2 PE=1 SV=1	70	1	Q05046	AT3G23990	mitochondrion	251864	99222.3	313782	91558.5	0.802673	0.213728
2,3-bisphosphoglycerate-independent phosphoglycerate mutase [Phalaenopsis equestris]	69	1	XP_020591641.1	AT1G09780	cytosol	90514.4	0	19094.8	10932.2	4.74026	N/A
26S protease regulatory subunit S10B homolog B [Phalaenopsis equestris]	69	1	XP_020589656.1	AT1G45000	nucleus,cytosol	129307	66959.8	198359	42858.1	0.651883	0.0236584
pectinesterase [Dendrobium catenatum]	68	1	XP_020692203.1	AT1G11580	extracellular	369276	146578	205679	113561	1.7954	0.02296
uncharacterized protein LOC110025362 [Phalaenopsis equestris]	62	1	XP_020581464.1	AT5G13420	plastid	46326.8	27189.7	47676.6	25280.6	0.971689	0.928502
Actin-7 OS=Arabidopsis thaliana GN=ACT7 PE=1 SV=1	61	1	P53492	AT5G09810	cytosol	55364	34438.9	95118.1	87130.5	0.582055	0.27382
cell division cycle protein 48 homolog [Dendrobium catenatum]	60	1	XP_020675811.1	AT3G53230	nucleus,cytosol	39461.3	4989.8	56217.6	5681.85	0.701938	0.0350579
actin-depolymerizing factor 7-like [Phalaenopsis equestris]	60	1	XP_020595358.1	AT5G59890	cytosol	15113.7	4578.76	20776.5	7635.69	0.727442	0.174756
Phospholipase D alpha 1 OS=Pimpinella brachycarpa GN=PLD1 PE=2 SV=1	60	1	O04883	AT3G15730	cytosol	294140	193895	233415	139659	1.26016	0.477587
Phospholipase D alpha 1 OS=Carica papaya GN=PLD1 PE=1 SV=1	58	1	P86387	AT3G15730	cytosol	222183	91206.7	209943	87915.2	1.0583	0.788984
S-adenosylmethionine synthase 5-like [Phalaenopsis equestris]	57	1	XP_020590204.1	AT1G02500	cytosol	0	NA	12315.8	11783.9	0.01	2.32367e-16
beta-glucosidase 22 [Dendrobium catenatum]	56	1	XP_020696227.1	AT4G27830	vacuole	15714.7	2339.52	24076.6	4187.51	0.652698	0.223414
Non-legume hemoglobin OS=Parasponia andersonii PE=1 SV=2	56	1	P68168	AT2G16060	cytosol	1.05321e+06	643989	1.11082e+06	402519	0.948143	0.829728
nascent polypeptide-associated complex subunit alpha-like protein 1 [Phalaenopsis equestris]	56	1	XP_020589765.1	AT3G12390	nucleus	14262.1	6234.35	14276.3	7995.71	0.999004	0.998792
beta-glucosidase 2-like [Dendrobium catenatum]	55	1	XP_020676273.1	AT1G02850	extracellular	12408.6	10000.9	27965.2	8009.46	0.443715	0.348603
T-complex protein 1 subunit beta isoform X1 [Phalaenopsis equestris]	55	1	XP_020582241.1	AT5G20890	cytosol	49541.4	40864.3	49029.5	18776	1.01044	0.983081
reactive Intermediate Deaminase A, chloroplastic [Phalaenopsis equestris]	54	1	XP_020593968.1	AT3G20390	plastid	59377.2	20064.2	46793.4	23069.8	1.26892	0.267801
Actin-53 (Fragment) OS=Nicotiana tabacum PE=3 SV=1	54	1	P93374	AT5G09810	cytosol	257483	175474	287334	115353	0.896109	0.688188
Alpha-1,4 glucan phosphorylase L-2 isozyme, chloroplastic/amyloplastic OS=Solanum tuberosum GN=STP-1 PE=1 SV=1	53	1	P53535	AT3G29320	plastid	142222	88482.8	250293	188061	0.568224	0.176976
LOW QUALITY PROTEIN: 3-ketoacyl-CoA thiolase 2, peroxisomal-like [Phalaenopsis equestris]	52	1	XP_020574595.1	AT2G33150	peroxisome	74149.2	0	57428.1	23183.5	1.29117	N/A
Adenosylhomocysteinase OS=Mesembryanthemum crystallinum GN=SAHH PE=2 SV=1	51	1	P93253	AT4G13940	cytosol	54994.7	15583.9	41184.8	17507.3	1.33531	0.119341
citrate synthase, mitochondrial [Dendrobium catenatum]	51	1	XP_028550042.1	AT2G44350	mitochondrion	39320	5295.32	36480.7	7251.95	1.07783	0.781798
Probable mediator of RNA polymerase II transcription subunit 37c OS=Arabidopsis thaliana GN=MED37C PE=1 SV=1	51	1	Q9LHA8	AT3G12580	cytosol	72507.6	64760.4	35569.4	25599.5	2.03848	0.227593
T-complex protein 1 subunit theta [Phalaenopsis equestris]	51	1	XP_020587047.1	AT3G03960	cytosol	315074	136466	343744	161985	0.916593	0.711162
Enolase OS=Mesembryanthemum crystallinum GN=PGH1 PE=2 SV=1	50	1	Q43130	AT2G36530	cytosol	0	NA	65515.7	0	N/A	N/A
Aconitate hydratase, cytoplasmic OS=Cucurbita maxima PE=2 SV=1	50	1	P49608	AT2G05710	mitochondrion	131534	119988	146835	112245	0.895796	0.796104
probable L-ascorbate peroxidase 6, chloroplastic [Phalaenopsis equestris]	50	1	XP_020573587.1	AT1G77490	plastid	157252	50603.3	225029	76135	0.69881	0.0581532
histone H2A [Phalaenopsis equestris]	49	1	XP_020571691.1	AT5G02560	nucleus	303166	147929	335639	283951	0.90325	0.811533
Elongation factor 1-alpha OS=Nicotiana tabacum PE=2 SV=1	48	1	P43643	AT5G60390	cytosol	0	NA	12424	0	N/A	N/A
40S ribosomal protein Sa-2-like [Dendrobium catenatum]	48	1	XP_020701934.1	AT1G72370	cytosol	17796.9	4233.87	16883.5	6226.51	1.0541	0.831356
UDP-glucose 6-dehydrogenase 4-like [Dendrobium catenatum]	47	1	XP_020702513.1	AT5G15490	extracellular	23907.2	14758.7	22609.5	15504.7	1.0574	0.889966
Tubulin beta-4 chain OS=Arabidopsis thaliana GN=TUBB4 PE=2 SV=2	47	1	P24636	AT5G44340	cytosol	264987	135409	289399	99813.7	0.915648	0.683813
Chaperonin CPN60-like 1, mitochondrial OS=Arabidopsis thaliana GN=At2g33210 PE=1 SV=1	47	1	Q8L7B5	AT2G33210	mitochondrion	243492	171917	296813	156119	0.820357	0.600711
non-symbiotic hemoglobin [Dendrobium catenatum]	47	1	XP_020704602.1	AT2G16060	cytosol	666131	633867	549001	377202	1.21335	0.652629
nuclear transport factor 2-like [Phalaenopsis equestris]	47	1	XP_020589907.1	AT1G27970	nucleus	213878	99766.5	299067	162713	0.71515	0.238618
elongation factor Tu, mitochondrial [Dendrobium catenatum]	46	1	XP_020699533.1	AT4G02930	mitochondrion	70970.5	20945.4	76745.8	33469.4	0.924748	0.693348
annexin D1-like [Phalaenopsis equestris]	46	1	XP_020588677.1	AT1G35720	peroxisome	1.32789e+06	489832	1.22478e+06	717549	1.08419	0.747866
UDP-glucose 6-dehydrogenase 4 [Dendrobium catenatum]	44	1	XP_028555872.1	AT5G15490	extracellular	136241	61031.7	197373	103485	0.690275	0.182584
glucose-6-phosphate isomerase, cytosolic isoform X1 [Phalaenopsis equestris]	44	1	XP_020590230.1	AT5G42740	cytosol	35885.6	17267.7	46475.2	22407.5	0.772145	0.314866
T-complex protein 1 subunit theta [Dendrobium catenatum]	43	1	XP_020682214.1	AT3G03960	cytosol	187582	0	0	NA	N/A	N/A
14-3-3-like protein 16R [Dendrobium catenatum]	43	1	XP_020696017.1	AT1G78300	cytosol	28549.8	10870.1	80682	39986.2	0.353856	0.0183741
nucleosome assembly protein 1;1 isoform X1 [Dendrobium catenatum]	42	1	XP_020690374.1	AT2G19480	nucleus	127267	64151.5	185090	105623	0.687596	0.217838
40S ribosomal protein S10-1-like [Phalaenopsis equestris]	42	1	XP_020585262.1	AT5G52650	cytosol	211679	75641.6	219376	67920.7	0.964916	0.833179
28 kDa ribonucleoprotein, chloroplastic [Dendrobium catenatum]	42	1	XP_020674127.1	AT4G24770	plastid	153927	49184	139830	87826.8	1.10081	0.706981
DAZ-associated protein 1 isoform X1 [Dendrobium catenatum]	42	1	XP_020678683.1	AT4G36960	cytosol	62277	33073.1	65522.2	35612.2	0.950472	0.85407
sorbitol dehydrogenase [Dendrobium catenatum]	41	1	XP_020685142.1	AT5G51970	cytosol	188701	106544	123345	46886.6	1.52986	0.120308
phosphoglucomutase, cytoplasmic [Phalaenopsis equestris]	41	1	XP_020586088.1	AT1G23190	cytosol	39799.1	13048.7	49248.3	14818	0.808132	0.36199
Phosphoglucomutase, cytoplasmic OS=Bromus inermis GN=PGM1 PE=2 SV=1	41	1	Q9SNX2	AT1G70730	cytosol	1.04273e+06	578896	1.062e+06	657032	0.981858	0.951788
Actin OS=Gossypium hirsutum PE=3 SV=1	41	1	O81221	AT3G53750	cytosol	36983.7	34942.3	106119	43926.6	0.348513	0.00656629	-0.706216	1.8151
aconitate hydratase, cytoplasmic-like [Dendrobium catenatum]	40	1	XP_020678609.1	AT4G35830	mitochondrion,cytosol	43198.7	20085.3	41391	14134.6	1.04367	0.852725
serine hydroxymethyltransferase 4-like [Phalaenopsis equestris]	39	1	XP_020588902.1	AT4G13930	cytosol	512791	0	0	NA	N/A	N/A
Tubulin beta-7 chain OS=Zea mays GN=TUBB7 PE=2 SV=1	39	1	Q41784	AT5G62700	cytosol	293284	191975	421573	196629	0.695689	0.208528
40S ribosomal protein S4 [Phalaenopsis equestris]	39	1	XP_020593455.1	AT5G58420	cytosol	75723.8	25618.2	92724.4	38991.8	0.816654	0.331067
60S ribosomal protein L18-2 isoform X1 [Dendrobium catenatum]	39	1	XP_020695539.1	AT3G05590	cytosol	119507	89083.8	137973	64296	0.866165	0.637066
reactive Intermediate Deaminase A, chloroplastic [Dendrobium catenatum]	38	1	XP_020688666.1	AT3G20390	plastid	155093	68580.8	167919	94792.9	0.923617	0.76585
biotin carboxylase 1, chloroplastic isoform X1 [Phalaenopsis equestris]	38	1	XP_020592692.1	AT5G35360	plastid	46564.5	15384.5	54816.7	28315.1	0.849459	0.580819
31 kDa ribonucleoprotein, chloroplastic-like, partial [Phalaenopsis equestris]	38	1	XP_020598454.1	AT5G50250	plastid	33644.5	22225	28368.5	3632.43	1.18598	0.709615
guanine nucleotide-binding protein subunit beta-like protein A [Phalaenopsis equestris]	37	1	XP_020599514.1	AT1G48630	cytosol	512278	331180	340031	215206	1.50656	0.227673
profilin-2-like [Phalaenopsis equestris]	36	1	XP_020575198.1	AT2G19770	plasma membrane	340444	92859.7	393626	181755	0.864892	0.488114
glyoxysomal fatty acid beta-oxidation multifunctional protein MFP-a [Phalaenopsis equestris]	36	1	XP_020583518.1	AT3G06860	peroxisome	145722	107495	186645	35943.7	0.780745	0.303495
glycine--tRNA ligase, mitochondrial 1 [Dendrobium catenatum]	36	1	XP_020699837.1	AT1G29880	cytosol	38285.6	24176	42600.9	14448.9	0.898704	0.672284
L-ascorbate peroxidase 2, cytosolic OS=Oryza sativa subsp. japonica GN=APX2 PE=1 SV=1	36	1	Q9FE01	AT1G07890	cytosol	443785	76924.9	455605	175464	0.974056	0.869275
Tubulin beta-5 chain OS=Arabidopsis thaliana GN=TUBB5 PE=2 SV=1	34	1	P29513	AT1G20010	cytosol	37960.8	21732.5	30999.8	43273.3	1.22455	0.845746
Heat shock 70 kDa protein OS=Glycine max GN=HSP70 PE=3 SV=1	34	1	P26413	AT1G16030	cytosol	31455.8	5229.99	48151.3	70807.8	0.653271	0.789598
uncharacterized protein LOC110033530 [Phalaenopsis equestris]	34	1	XP_020593205.1	AT1G09310	cytosol	242781	42551.2	161871	173327	1.49984	0.623484
RuBisCO large subunit-binding protein subunit beta, chloroplastic (Fragment) OS=Secale cereale GN=CPN60 PE=2 SV=1	34	1	Q43831	AT1G55490	plastid	156473	26401.6	137042	65386.2	1.14179	0.466861
Cysteine proteinase inhibitor 6 OS=Arabidopsis thaliana GN=CYS6 PE=1 SV=2	34	1	Q8H0X6	AT3G12490	cytosol	273304	140872	297906	83696.1	0.917418	0.670291
60S ribosomal protein L23 OS=Arabidopsis thaliana GN=RPL23A PE=2 SV=3	34	1	P49690	AT1G04480	nucleus,cytosol	71022	38243.4	98046.9	50464.5	0.724367	0.254436
Mediator of RNA polymerase II transcription subunit 37f OS=Arabidopsis thaliana GN=MED37F PE=1 SV=2	33	1	Q39043	AT5G42020	endoplasmic reticulum	29039.8	14483.5	31785.4	10842.9	0.913621	0.738901
cysteine proteinase inhibitor 12-like [Phalaenopsis equestris]	33	1	XP_020580069.1	AT3G12490	cytosol	355978	205469	308190	114978	1.15506	0.564841
elongation factor 1-delta-like [Dendrobium catenatum]	33	1	XP_020698181.2	AT1G30230	cytosol	166173	64959.4	193508	76935.3	0.858737	0.46058
60S ribosomal protein L3-like [Phalaenopsis equestris]	33	1	XP_020589082.1	AT1G43170	cytosol	35495.1	13950.5	26445.3	10015.3	1.34221	0.322697
heterogeneous nuclear ribonucleoprotein 1 [Phalaenopsis equestris]	33	1	XP_020591291.1	AT4G36960	cytosol	121901	44559	146884	104466	0.829915	0.559619
V-type proton ATPase subunit B 1 OS=Hordeum vulgare PE=2 SV=1	33	1	Q40078	AT4G38510	vacuole	49775.4	26130.1	83647.8	62076.3	0.595059	0.438685
Probable histone H2A.2 OS=Oryza sativa subsp. japonica GN=Os07g0545400 PE=2 SV=1	32	1	Q6ZL42	AT5G54640	nucleus	179611	66722.3	174379	65659.2	1.03	0.944022
3-ketoacyl-CoA thiolase 2, peroxisomal-like [Phalaenopsis equestris]	32	1	XP_020596065.1	AT2G33150	peroxisome	97751.5	80101.4	33543.9	37373	2.91414	0.217067
60S ribosomal protein L32-1 [Dendrobium catenatum]	32	1	XP_020690789.1	AT4G18100	cytosol	57619.8	37988.7	58195.8	22726.9	0.990103	0.982216
Annexin D1 OS=Arabidopsis thaliana GN=ANN1 PE=1 SV=1	32	1	Q9SYT0	AT1G35720	peroxisome	233864	122614	158731	56865.3	1.47333	0.124376
Catalase isozyme 2 OS=Ricinus communis GN=CAT2 PE=2 SV=1	32	1	P49318	AT4G35090	peroxisome	83640.6	50773.9	13728.9	0	6.09232	N/A
Probable mediator of RNA polymerase II transcription subunit 37c OS=Arabidopsis thaliana GN=MED37D PE=1 SV=2	31	1	P22954	AT5G02490	cytosol	9061.09	0	35653	3606.36	N/A	N/A
60S ribosomal protein L3-1 OS=Arabidopsis thaliana GN=ARP1 PE=2 SV=5	31	1	P17094	AT1G43170	cytosol	287930	132786	314602	79987.2	0.91522	0.626143
60S ribosomal protein L18-2-like [Phalaenopsis equestris]	31	1	XP_020594226.1	AT3G05590	cytosol	26756.3	19058.6	31099.5	14261.3	0.860344	0.782397
Glyceraldehyde-3-phosphate dehydrogenase, cytosolic OS=Physcomitrella patens subsp. patens GN=GAPC PE=2 SV=1	30	1	P34923	AT1G13440	nucleus,cytosol	15651.9	0	33244.2	10848.4	N/A	N/A
pyruvate dehydrogenase E1 component subunit beta-1, mitochondrial-like [Phalaenopsis equestris]	30	1	XP_020581938.1	AT5G50850	mitochondrion	168829	51313.8	222101	101800	0.760146	0.2215
Isoflavone reductase homolog OS=Solanum tuberosum PE=2 SV=1	30	1	P52578	AT4G39230	cytosol	117304	79814.6	303186	131710	0.386905	0.00443724
40S ribosomal protein S10-1-like [Phalaenopsis equestris]	30	1	XP_020596660.1	AT5G52650	cytosol	22745.7	19555.2	20449.1	10029.2	1.11231	0.821283
Monodehydroascorbate reductase, seedling isozyme OS=Cucumis sativus PE=2 SV=1	30	1	Q42711	AT3G52880	peroxisome	87723.3	65656	108528	43358.4	0.808303	0.458299
pyruvate decarboxylase 1 [Dendrobium catenatum]	29	1	XP_020695743.1	AT5G01320	cytosol	79476.5	48160.2	109391	67443	0.726539	0.368696
Phosphoenolpyruvate carboxylase 2 OS=Mesembryanthemum crystallinum GN=PPC2 PE=3 SV=1	29	1	P16097	AT1G53310	cytosol	44968.1	44643.7	22507.1	9573.78	1.99795	0.446677
Actin (Fragment) OS=Acetabularia cliftonii PE=3 SV=1	29	1	P53491	AT3G53750	cytosol	21161.7	4914.3	36676.5	3249.55	0.576982	0.0460222
Catalase OS=Pisum sativum PE=2 SV=1	29	1	P25890	AT4G35090	peroxisome	87126.3	88283.6	137463	60213	0.633815	0.195254
guanine nucleotide-binding protein subunit beta-like protein A [Dendrobium catenatum]	29	1	XP_020703567.1	AT1G48630	cytosol	67534.9	56.4594	43423.5	17908.4	1.55526	0.195001
KH domain-containing protein At4g18375 isoform X1 [Phalaenopsis equestris]	29	1	XP_020587384.1	AT5G46190	nucleus	24065.9	3706.88	45783	14201.7	0.525652	0.0561961
ERBB-3 BINDING PROTEIN 1 [Phalaenopsis equestris]	29	1	XP_020583209.1	AT3G51800	nucleus	38849.6	13582.8	33319.5	11249.3	1.16597	0.483279
ADP,ATP carrier protein, mitochondrial OS=Oryza sativa subsp. japonica GN=Os02g0718900 PE=2 SV=1	29	1	P31691	AT5G13490	mitochondrion	48487.8	21857.4	59943.6	24943.3	0.808891	0.349423
Phosphoenolpyruvate carboxylase 2 OS=Arabidopsis thaliana GN=PPC2 PE=1 SV=2	28	1	Q5GM68	AT2G42600	cytosol	63219.2	27144.3	67192.5	18953	0.940866	0.743126
NADP-dependent malic enzyme OS=Mesembryanthemum crystallinum GN=MOD1 PE=2 SV=1	28	1	P37223	AT1G79750	plastid	259199	98451.6	269475	71941.4	0.961865	0.812617
probable linoleate 9S-lipoxygenase 5 [Dendrobium catenatum]	28	1	XP_020694151.1	AT1G55020	golgi	1.14569e+06	210471	654958	482418	1.74927	0.0245313
proteasome subunit beta type-6 [Dendrobium catenatum]	28	1	XP_020688952.1	AT4G31300	nucleus,cytosol	87145.5	46553.1	112175	58317.9	0.776873	0.389082
14-3-3-like protein GF14-C OS=Oryza sativa subsp. japonica GN=GF14C PE=1 SV=1	28	1	Q6ZKC0	AT5G38480	cytosol	228230	61096.7	195879	78454.1	1.16516	0.380281
14-3-3-like protein GF14-G OS=Oryza sativa subsp. japonica GN=GF14G PE=2 SV=1	28	1	Q5QNB8	AT1G26480	nucleus	272241	149203	251457	140297	1.08265	0.814124
LOW QUALITY PROTEIN: chaperone protein ClpB3, chloroplastic-like [Phalaenopsis equestris]	27	1	XP_020582166.1	AT5G15450	plastid	15688.2	9603.82	23371.4	11804.8	0.671255	0.342173
urease accessory protein G [Dendrobium catenatum]	27	1	XP_020700135.1	AT2G34470	cytosol	37256.8	17969.9	27270.8	14719.9	1.36618	0.272364
selenium-binding protein 2 isoform X1 [Dendrobium catenatum]	27	1	XP_020686339.1	AT4G14040	cytosol	183591	87777.6	189483	81762.2	0.968904	0.891484
LRR receptor-like serine/threonine-protein kinase GSO2 [Dendrobium catenatum]	27	1	XP_020691282.1	AT5G06870	extracellular	223539	107072	203073	81450.8	1.10078	0.670018
40S ribosomal protein S4 OS=Gossypium hirsutum GN=RPS4 PE=2 SV=1	27	1	P46299	AT5G58420	cytosol	112442	31574.7	104065	32684.9	1.0805	0.612132
60S ribosomal protein L32-1 [Phalaenopsis equestris]	27	1	XP_020589502.1	AT4G18100	cytosol	168802	95148.7	155785	98090.8	1.08356	0.792658
Pectinesterase 2 OS=Arabidopsis thaliana GN=PME2 PE=2 SV=2	26	1	Q42534	AT1G53830	extracellular	135384	103759	74814.4	68134.8	1.8096	0.179747
Malate dehydrogenase, cytoplasmic OS=Mesembryanthemum crystallinum GN=MDH PE=2 SV=1	26	1	O24047	AT5G43330	cytosol	278938	169642	597857	251755	0.466563	0.143063
Malate dehydrogenase, cytoplasmic OS=Beta vulgaris GN=NR1 PE=1 SV=1	26	1	Q9SML8	AT1G04410	vacuole	291195	368116	167237	123267	1.74121	0.523313
uncharacterized protein LOC110115660 [Dendrobium catenatum]	26	1	XP_020704622.1	AT3G24255	cytosol	1.14282e+06	752306	1.09999e+06	609293	1.03893	0.901459
calnexin homolog 1-like [Dendrobium catenatum]	26	1	XP_028550905.1	AT5G61790	endoplasmic reticulum	117780	48741.8	122964	48629.1	0.957845	0.835055
Elongation factor 1-gamma 2 OS=Oryza sativa subsp. japonica GN=Os02g0220500 PE=2 SV=2	26	1	Q6YW46	AT1G57720	cytosol	301391	120959	365986	103985	0.823506	0.267888
LOW QUALITY PROTEIN: elongation factor 1-gamma 2-like [Phalaenopsis equestris]	26	1	XP_020578693.1	AT1G09640	cytosol	24651.5	3852.88	22714.1	3112.55	1.0853	0.664313
Superoxide dismutase [Mn], mitochondrial OS=Nicotiana plumbaginifolia GN=SODA PE=1 SV=1	26	1	P11796	AT3G10920	mitochondrion	164918	86790.1	227922	59515.4	0.723573	0.105158	-0.705247	2.02498
2-Cys peroxiredoxin BAS1, chloroplastic [Dendrobium catenatum]	26	1	XP_020695112.1	AT3G11630	plastid	265515	266872	225295	112255	1.17852	0.689686
Heat shock 70 kDa protein, mitochondrial OS=Pisum sativum GN=HSP1 PE=2 SV=1	25	1	P37900	AT5G09590	mitochondrion	29661.2	22487.4	10227.3	12369.7	2.90021	0.189886
LOW QUALITY PROTEIN: heat shock 70 kDa protein 14-like [Phalaenopsis equestris]	25	1	XP_020571232.1	AT1G79930	cytosol	50543.7	9633.78	34156.5	14919.9	1.47977	0.23642
endo-1,3;1,4-beta-D-glucanase-like [Dendrobium catenatum]	25	1	XP_020685279.1	AT3G23600	cytosol	486925	582502	130537	61953.2	3.73017	0.351747
proteasome subunit alpha type-5 isoform X1 [Dendrobium catenatum]	25	1	XP_020687986.1	AT3G14290	nucleus,cytosol	17236.8	7238.59	33075	10045.1	0.521144	0.00846571
60S ribosomal protein L17 [Phalaenopsis equestris]	25	1	XP_020580638.1	AT1G67430	nucleus,cytosol	203584	61293.1	197343	100353	1.03163	0.8861
peroxiredoxin-2F, mitochondrial isoform X1 [Dendrobium catenatum]	25	1	XP_020688107.1	AT3G06050	mitochondrion	109791	65524	122664	37780	0.895059	0.629203
14-3-3-like protein B OS=Hordeum vulgare PE=2 SV=1	25	1	Q43470	AT5G38480	cytosol	140807	24349.2	307502	154654	0.457905	0.0921897
V-type proton ATPase catalytic subunit A (Fragment) OS=Hordeum vulgare PE=2 SV=1	25	1	Q40002	AT1G78900	vacuole,golgi	74795	21395	70079	19195.5	1.0673	0.671172
Granule-bound starch synthase 1, chloroplastic/amyloplastic OS=Pisum sativum PE=1 SV=1	24	1	Q43092	AT1G32900	plastid	315441	186906	383964	146370	0.821538	0.422952
enoyl-[acyl-carrier-protein] reductase [NADH] 1, chloroplastic [Dendrobium catenatum]	24	1	XP_020698572.1	AT2G05990	plastid	25968.1	8401.07	23395.4	11666.9	1.10996	0.708654
uncharacterized protein LOC110038244 [Phalaenopsis equestris]	24	1	XP_020598673.1	AT2G32520	cytosol	546528	342237	366110	262701	1.4928	0.25037
protein TIC110, chloroplastic-like [Dendrobium catenatum]	24	1	XP_028551325.1	AT1G06950	plastid	22975.2	9344.57	27334.2	9144.67	0.840528	0.36205
transketolase, chloroplastic-like [Dendrobium catenatum]	23	1	XP_020683805.1	AT2G45290	plastid	51575.5	34803.9	60660.2	39669	0.850235	0.652945
Malate dehydrogenase, cytoplasmic 1 OS=Arabidopsis thaliana GN=At1g04410 PE=1 SV=2	23	1	P93819	AT1G04410	vacuole	0	NA	30790.1	0	N/A	N/A
Stromal 70 kDa heat shock-related protein, chloroplastic (Fragment) OS=Spinacia oleracea GN=CHSP70 PE=2 SV=1	23	1	Q08080	AT4G24280	plastid	35260.5	26273.2	47982.6	40906.3	0.734861	0.500048
enoyl-[acyl-carrier-protein] reductase [NADH] 1, chloroplastic [Phalaenopsis equestris]	23	1	XP_020579006.1	AT2G05990	plastid	216924	22710.6	393225	207279	0.551654	0.421847
annexin D2 [Dendrobium catenatum]	23	1	XP_020700561.2	AT5G65020	plasma membrane,cytosol	734301	335330	992895	407888	0.739555	0.192056
glutathione reductase, cytosolic [Phalaenopsis equestris]	23	1	XP_020584803.1	AT3G24170	peroxisome	294679	116945	254449	98795.5	1.15811	0.483157
glycine-rich RNA-binding protein RZ1C-like [Phalaenopsis equestris]	23	1	XP_020587126.1	AT5G04280	nucleus	88930.1	40710.3	107729	40507.3	0.825496	0.371038
Proteasome subunit alpha type-6 OS=Glycine max GN=PAA1 PE=2 SV=2	22	1	O48551	AT5G35590	nucleus,cytosol	178902	45770.3	199666	32456.5	0.896005	0.304939
ubiquitin-conjugating enzyme E2 7-like isoform X2 [Phalaenopsis equestris]	22	1	XP_020574372.1	AT5G59300	nucleus	4931.81	0	52321.3	0	N/A	N/A
calnexin homolog 1-like isoform X1 [Phalaenopsis equestris]	22	1	XP_020581398.1	AT5G61790	endoplasmic reticulum	59179.8	14051.3	67485.4	25775	0.876928	0.548113
LOW QUALITY PROTEIN: 60S ribosomal protein L17-like [Phalaenopsis equestris]	22	1	XP_020589910.1	AT1G67430	nucleus,cytosol	19463.4	13765.3	27853.5	21190.8	0.698777	0.400898
L-ascorbate peroxidase 3, peroxisomal OS=Arabidopsis thaliana GN=APX3 PE=1 SV=1	22	1	Q42564	AT4G35000	peroxisome	166749	40584.7	144814	85762.9	1.15147	0.538815
cationic peroxidase 1-like [Phalaenopsis equestris]	22	1	XP_020585938.1	AT5G05340	extracellular	77747	42847	72092.9	36784.9	1.07843	0.801962
Catalase-3 OS=Arabidopsis thaliana GN=CAT3 PE=1 SV=3	22	1	Q42547	AT1G20620	peroxisome	2.79238e+06	1.79205e+06	1.50929e+06	429958	1.85013	0.150568
mitochondrial import inner membrane translocase subunit Tim13 [Dendrobium catenatum]	22	1	XP_020675372.2	AT1G61570	mitochondrion	45404.1	11647.1	55793.6	20476.6	0.813786	0.245373
Histone H2A OS=Euphorbia esula PE=2 SV=1	21	1	Q9M531	AT5G02560	nucleus	39289.4	26615.1	91270.6	40558.6	0.430472	0.00945982
Clathrin heavy chain 1 OS=Arabidopsis thaliana GN=CHC1 PE=1 SV=1	21	1	Q0WNJ6	AT3G11130	plasma membrane	26876.6	5070.47	22981.1	11464.6	1.16951	0.661824
acetyl-CoA carboxylase 1 [Dendrobium catenatum]	21	1	XP_020672392.1	AT1G36160	cytosol	36719.5	12991.5	15858.6	7514.29	2.31543	0.0752796
enoyl-[acyl-carrier-protein] reductase [NADH] 1, chloroplastic [Dendrobium catenatum]	21	1	XP_020684762.1	AT2G05990	plastid	49227.1	27643.9	99011.1	66953.6	0.497188	0.081364
LOW QUALITY PROTEIN: urease accessory protein G [Phalaenopsis equestris]	21	1	XP_020591467.1	AT2G34470	cytosol	100724	68293	148961	91078.1	0.676178	0.257982
glycine--tRNA ligase, mitochondrial 1-like [Dendrobium catenatum]	21	1	XP_020689689.1	AT1G29880	cytosol	23524.2	12710	5682.68	1848.66	4.13964	0.155639
phosphoenolpyruvate carboxykinase (ATP) [Dendrobium catenatum]	20	1	XP_028548050.1	AT4G37870	cytosol	19037	11151.4	32274.5	13286.6	0.589846	0.115746
pirin-like protein [Dendrobium catenatum]	20	1	XP_020678452.1	AT2G43120	mitochondrion	103502	72873.6	38271.8	24673.8	2.70439	0.0238719	0.747209	2.83477
probable NAD(P)H dehydrogenase (quinone) FQR1-like 1 [Phalaenopsis equestris]	20	1	XP_020592238.1	AT4G27270	plasma membrane	173982	96492.9	276484	188638	0.629264	0.206175
isoflavone reductase-like protein [Phalaenopsis equestris]	20	1	XP_020572458.1	AT4G39230	cytosol	61681.3	31794.6	45069.3	13679	1.36859	0.211554
Proteasome subunit alpha type-2 OS=Oryza sativa subsp. japonica GN=PAB1 PE=2 SV=1	20	1	Q10KF0	AT1G16470	nucleus,cytosol	66683	14973.1	91219.7	29526	0.731015	0.0700906
MADS-box transcription factor 14-like [Phalaenopsis equestris]	20	1	XP_020591077.1	AT1G69120	nucleus	3.44949e+06	2.17947e+06	3.44223e+06	2.88883e+06	1.00211	0.995639
isoamylase 3, chloroplastic-like [Dendrobium catenatum]	19	1	XP_020690934.1	AT4G09020	plastid	49057.1	11185.8	41789.6	9172.19	1.17391	0.172568
uncharacterized protein LOC110032359 [Phalaenopsis equestris]	19	1	XP_020591617.1	AT1G01170	mitochondrion	90330.9	41902.6	94362.4	17651.6	0.957276	0.798554
Leucine aminopeptidase 2, chloroplastic OS=Solanum lycopersicum GN=LAPA2 PE=2 SV=1	19	1	Q42876	AT2G24200	cytosol	96044.9	44680.4	107434	27690.9	0.893988	0.540988
60S ribosomal protein L38-like [Phalaenopsis equestris]	19	1	XP_020595490.1	AT3G59540	cytosol	71307.2	49313	110407	51990.8	0.645858	0.145723
glutaredoxin [Phalaenopsis equestris]	19	1	XP_020593264.1	AT5G63030	cytosol	475631	122607	506580	265162	0.938905	0.777328
probable aquaporin PIP1-2 [Phalaenopsis equestris]	19	1	XP_020574499.1	AT4G23400	plasma membrane	98435.6	91717.2	319470	435073	0.308121	0.201744
Aspartate aminotransferase 2 (Fragments) OS=Pseudotsuga menziesii PE=1 SV=1	18	1	P85951	AT4G31990	plastid	83991.5	32041.6	78549.6	21950.6	1.06928	0.693009
LOW QUALITY PROTEIN: uncharacterized protein LOC110109642 [Dendrobium catenatum]	18	1	XP_028556238.1	AT5G20950	extracellular	68561.4	29181.8	136662	51591.6	0.501684	0.00631435
glucose-6-phosphate isomerase 1, chloroplastic-like [Dendrobium catenatum]	18	1	XP_020681000.1	AT4G24620	plastid	60670.7	20079.2	60121.6	20128.9	1.00913	0.957383
Aldehyde dehydrogenase family 2 member B4, mitochondrial OS=Arabidopsis thaliana GN=ALDH2B4 PE=1 SV=1	18	1	Q9SU63	AT3G48000	mitochondrion	83787.7	37035.3	77743.3	29815.5	1.07775	0.722335
Ferredoxin--nitrite reductase, chloroplastic OS=Oryza sativa subsp. japonica GN=Os01g0357100 PE=2 SV=1	18	1	Q42997	AT2G15620	plastid	158179	56364.2	138726	67612.7	1.14023	0.547147
probable 26S proteasome non-ATPase regulatory subunit 3 [Phalaenopsis equestris]	18	1	XP_020596835.1	AT1G20200	nucleus,cytosol	29789.3	9840.46	46333.2	23983.1	0.642938	0.191134
peptidyl-prolyl cis-trans isomerase 1-like [Phalaenopsis equestris]	18	1	XP_020593677.1	AT3G56070	mitochondrion	123823	52587.2	180963	53367.1	0.684245	0.0479254
Eukaryotic translation initiation factor 5A-2 OS=Arabidopsis thaliana GN=At1g26630 PE=1 SV=1	18	1	Q93VP3	AT1G26630	cytosol	65428.5	49712.4	88808.1	84216	0.736741	0.585406
probable phospholipid hydroperoxide glutathione peroxidase isoform X1 [Phalaenopsis equestris]	18	1	XP_020584657.1	AT2G43350	endoplasmic reticulum	657873	332633	756606	402814	0.869506	0.606266
putative receptor-like protein kinase At1g80870 [Dendrobium catenatum]	18	1	XP_020687334.1	AT1G80870	plasma membrane	567581	307789	617109	299452	0.919743	0.759593
Uncharacterized protein At3g15000, mitochondrial OS=Arabidopsis thaliana GN=At3g15000 PE=1 SV=1	18	1	Q9LKA5	AT3G15000	mitochondrion	69574.4	34426.7	84274.9	47309.9	0.825565	0.497351
copper transport protein ATX1 [Dendrobium catenatum]	18	1	XP_020705812.1	AT1G66240	plasma membrane	58072.2	19093.7	73974.6	45272.5	0.785029	0.393776
outer envelope pore protein 16-2, chloroplastic [Dendrobium catenatum]	18	1	XP_020697588.1	AT4G16160	plastid	108980	25558.4	119936	32984.7	0.908649	0.477123
3-isopropylmalate dehydrogenase 2, chloroplastic-like [Phalaenopsis equestris]	17	1	XP_020586440.1	AT1G80560	plastid	95062	41480.9	79497.2	26035.6	1.19579	0.373401
aspartate aminotransferase, mitochondrial [Phalaenopsis equestris]	17	1	XP_020587870.1	AT2G30970	mitochondrion	44363	11874.1	42602.6	15885.6	1.04132	0.81307
NADP-dependent glyceraldehyde-3-phosphate dehydrogenase OS=Nicotiana plumbaginifolia GN=GAPN PE=2 SV=1	17	1	P93338	AT2G24270	cytosol	55818.4	15164	46274.1	11062	1.20626	0.165229
Sucrose-phosphatase 1 OS=Nicotiana tabacum GN=SPP1 PE=2 SV=1	17	1	Q5IH14	AT2G35840	cytosol	46165.8	12838.1	43857.7	15359.9	1.05263	0.752412
Cell division control protein 48 homolog E OS=Arabidopsis thaliana GN=CDC48E PE=1 SV=2	17	1	Q9LZF6	AT5G03340	cytosol	11233.4	10383.3	141196	184150	0.0795592	0.140591
isocitrate dehydrogenase [NAD] regulatory subunit 1, mitochondrial isoform X1 [Phalaenopsis equestris]	17	1	XP_020599716.1	AT4G35260	mitochondrion	35539.9	15922.5	38045.7	4268.3	0.934136	0.659131
succinate dehydrogenase subunit 5, mitochondrial-like [Dendrobium catenatum]	17	1	XP_020680959.2	AT1G47420	mitochondrion	60981.3	30465.1	84597	25569.6	0.720844	0.111329	-0.75529	1.86083
chaperone protein ClpB3, mitochondrial-like [Phalaenopsis equestris]	17	1	XP_020572361.1	AT2G25140	mitochondrion	17184.1	8311.67	22497.4	8196.94	0.763827	0.410678
uncharacterized protein OsI_027940 isoform X1 [Dendrobium catenatum]	17	1	XP_020705889.1	AT4G02450	cytosol	60663.1	25027	57022.7	21616.7	1.06384	0.759101
uncharacterized protein LOC110039118 [Phalaenopsis equestris]	17	1	XP_020599736.1	AT5G38900	cytosol	51020	29676.3	76699.6	50691.8	0.665192	0.248835
Elongation factor Tu, chloroplastic OS=Glycine max GN=TUFA PE=3 SV=1	17	1	Q43467	AT4G20360	plastid	87120.4	19757.7	46302.2	18847.8	1.88156	0.000660367
60S acidic ribosomal protein P1-like [Dendrobium catenatum]	17	1	XP_020683802.1	AT5G24510	cytosol	720844	304734	719805	322220	1.00144	0.996147
Glutathione reductase, cytosolic OS=Pisum sativum PE=2 SV=1	17	1	Q43621	AT3G24170	peroxisome	90106.3	46061	105268	45420.2	0.855971	0.519059
glycine-rich RNA-binding protein RZ1C-like isoform X1 [Dendrobium catenatum]	17	1	XP_020682224.2	AT5G04280	nucleus	48259.2	17014.3	62454.9	30337.7	0.772704	0.309109
external alternative NAD(P)H-ubiquinone oxidoreductase B2, mitochondrial [Dendrobium catenatum]	17	1	XP_020679023.1	AT4G21490	mitochondrion	58754.6	23110.9	71666.1	33704.3	0.819837	0.396729
mitochondrial dicarboxylate/tricarboxylate transporter DTC-like [Phalaenopsis equestris]	17	1	XP_020587202.1	AT5G19760	mitochondrion	34682.2	4617	50681	30921.1	0.684322	0.434014
chorismate mutase 1, chloroplastic [Phalaenopsis equestris]	16	1	XP_020578436.1	AT1G69370	plastid	53476.8	17726	66163.1	25379	0.808257	0.321462
Phosphoenolpyruvate carboxylase OS=Solanum tuberosum GN=PPC1 PE=2 SV=2	16	1	P29196	AT1G53310	cytosol	44968.1	44643.7	22507.1	9573.78	1.99795	0.446677
Malate dehydrogenase, cytoplasmic OS=Medicago sativa GN=CMDH PE=2 SV=1	16	1	O48905	AT1G04410	vacuole	201243	135115	485811	355331	0.414242	0.242417
ricin B-like lectin R40C1 [Dendrobium catenatum]	16	1	XP_020695026.2	AT2G39050	nucleus	57477.7	27828.5	37171.7	23361.6	1.54628	0.299812
Histone H2A.1 OS=Solanum lycopersicum PE=2 SV=1	16	1	P25469	AT5G27670	nucleus	5812.49	0	172915	102551	0.0336147	0.000871846
ATP synthase subunit d, mitochondrial [Phalaenopsis equestris]	16	1	XP_020572444.1	AT3G52300	mitochondrion	14334.3	2306.33	16206.7	5839.46	0.884466	0.760158
uncharacterized protein LOC110114124 isoform X1 [Dendrobium catenatum]	16	1	XP_020702551.1	AT1G14980	mitochondrion	49768.6	20892.6	49080.7	15480.4	1.01402	0.94685
Peroxisomal fatty acid beta-oxidation multifunctional protein MFP2 OS=Arabidopsis thaliana GN=MFP2 PE=1 SV=1	16	1	Q9ZPI5	AT3G06860	peroxisome	19731.8	6755.91	24259.7	13398.4	0.813357	0.457428
LOW QUALITY PROTEIN: stem-specific protein TSJT1-like [Phalaenopsis equestris]	16	1	XP_020598931.1	AT5G19140	plasma membrane	144363	70327.9	260765	116261	0.553613	0.0320479
probable carboxylesterase 2 [Dendrobium catenatum]	16	1	XP_020684679.1	AT1G47480	cytosol	112646	39357.3	101157	23551.7	1.11358	0.479897
mitochondrial-processing peptidase subunit alpha isoform X1 [Dendrobium catenatum]	16	1	XP_020691637.1	AT1G51980	mitochondrion	14909	9288.68	9459.08	4670.99	1.57616	0.360023
proteasome subunit beta type-2-A-like [Phalaenopsis equestris]	16	1	XP_020579870.1	AT3G22630	nucleus,cytosol	58067.9	17772.6	65197.3	20358.8	0.89065	0.503476
calreticulin-like [Phalaenopsis equestris]	16	1	XP_020574873.1	AT1G56340	endoplasmic reticulum	21325.1	12183.2	112617	103045	0.18936	0.320593
40S ribosomal protein S26-3 OS=Arabidopsis thaliana GN=RPS26C PE=2 SV=1	16	1	Q9LYK9	AT3G56340	cytosol	98088.2	42560.2	98166.4	36845.2	0.999203	0.996906
Phospholipase D alpha 1 OS=Oryza sativa subsp. japonica GN=PLD1 PE=1 SV=2	16	1	Q43007	AT3G15730	cytosol	90267.3	37013	90729.6	60192.7	0.994905	0.987167
Glycine-rich RNA-binding protein blt801 OS=Hordeum vulgare GN=blt801 PE=1 SV=1	16	1	Q43472	AT2G21660	nucleus	31333	12961.7	42225.1	22816.7	0.742046	0.273131
DEAD-box ATP-dependent RNA helicase 52C isoform X1 [Dendrobium catenatum]	16	1	XP_020685831.1	AT3G58570	nucleus	37575.7	31907.8	29718.9	14162.5	1.26437	0.576688
polyadenylate-binding protein 2 [Dendrobium catenatum]	16	1	XP_020700074.1	AT4G34110	nucleus	38263.9	14610.6	34758.7	8931.89	1.10084	0.648792
importin subunit alpha-1-like isoform X2 [Phalaenopsis equestris]	16	1	XP_020595445.1	AT3G06720	nucleus	168858	65123.9	197734	75631.4	0.853963	0.509135
serine hydroxymethyltransferase, mitochondrial [Phalaenopsis equestris]	15	1	XP_020571125.1	AT4G37930	mitochondrion	65295.8	43604.9	70671.4	43728.9	0.923935	0.809841
phospho-2-dehydro-3-deoxyheptonate aldolase 1, chloroplastic [Dendrobium catenatum]	15	1	XP_020703547.1	AT1G22410	plastid	14005.9	0	27431.2	13243.3	N/A	N/A
stress-response A/B barrel domain-containing protein HS1 [Phalaenopsis equestris]	15	1	XP_020588664.1	AT3G17210	cytosol	97383.4	23217.1	72541.9	30930.9	1.34244	0.094392
nucleolin isoform X1 [Phalaenopsis equestris]	15	1	XP_020585371.1	AT2G44710	nucleus	41812.1	16320.6	51815.2	29536.5	0.806947	0.456727
late embryogenesis abundant protein Lea14-A [Dendrobium catenatum]	15	1	XP_020703842.1	AT2G46140	cytosol	533113	203202	355232	138339	1.50074	0.0639521
caffeic acid 3-O-methyltransferase [Phalaenopsis equestris]	15	1	XP_020571332.1	AT3G53140	cytosol	90442.3	65416.4	44463.8	13075.3	2.03407	0.218218
elicitor-responsive protein 3 [Dendrobium catenatum]	15	1	XP_020682776.1	AT1G63220	cytosol	131241	47828	167439	140620	0.783814	0.520691
heterogeneous nuclear ribonucleoprotein Q isoform X1 [Dendrobium catenatum]	15	1	XP_020686662.2	AT2G44710	nucleus	74256.5	33510.8	84754.2	35882.6	0.876139	0.575184
chlorophyll a-b binding protein of LHCII type 1-like [Phalaenopsis equestris]	15	1	XP_020598073.1	AT1G29930	plastid	0	NA	39387.9	0	N/A	N/A
Momilactone A synthase OS=Oryza sativa subsp. japonica GN=Os04g0179200 PE=2 SV=1	15	1	Q7FAE1	AT1G52340	cytosol	157542	147045	71913.4	23326	2.19072	0.130068
basic 7S globulin-like [Phalaenopsis equestris]	15	1	XP_020600089.1	AT1G03220	extracellular	43450.9	18670.5	79418.5	33761	0.547114	0.0215567
Proteasome subunit alpha type-3 OS=Arabidopsis thaliana GN=PAG1 PE=1 SV=2	15	1	O23715	AT2G27020	nucleus,cytosol	30884.1	6168.98	37747.5	12400.2	0.818177	0.256366
ubiquitin receptor RAD23d-like isoform X1 [Phalaenopsis equestris]	15	1	XP_020583492.1	AT3G02540	nucleus	83603.3	23376.2	60953.7	26740.2	1.37159	0.277684
Peptidyl-prolyl cis-trans isomerase CYP19-2 OS=Arabidopsis thaliana GN=CYP19-2 PE=1 SV=1	15	1	Q9SKQ0	AT2G21130	cytosol	0	NA	7548	1333	N/A	N/A
glutathione S-transferase F10-like [Phalaenopsis equestris]	15	1	XP_020599441.1	AT2G30870	cytosol	51494	22605.4	92024.4	23628.2	0.559569	0.00312103
PLAT domain-containing protein 3 [Dendrobium catenatum]	15	1	XP_020697431.1	AT4G39730	plastid	441560	169690	314863	226604	1.40239	0.243697
serine/arginine-rich splicing factor RS31 isoform X1 [Dendrobium catenatum]	15	1	XP_020681723.1	AT3G61860	nucleus	24542.3	4263.38	35818.6	17187.2	0.685183	0.219248
mitochondrial import inner membrane translocase subunit TIM14-3-like isoform X1 [Phalaenopsis equestris]	15	1	XP_020578131.1	AT5G03030	mitochondrion	42670	17719.8	36495.3	26521.8	1.16919	0.642971
arginase 1, mitochondrial [Dendrobium catenatum]	14	1	XP_020676907.1	AT4G08900	mitochondrion	64020.6	20635.2	50788.9	13534.2	1.26052	0.225539
S-adenosylmethionine synthase 3 OS=Vitis vinifera GN=METK3 PE=3 SV=1	14	1	A7QJG1	AT2G36880	cytosol	31593.7	16953.7	45123.3	40741.4	0.700163	0.486049
probable gamma-aminobutyrate transaminase 3, mitochondrial isoform X1 [Dendrobium catenatum]	14	1	XP_020696779.2	AT3G22200	mitochondrion	36322.6	14634.3	34834.4	13075.6	1.04272	0.832866
sedoheptulose-1,7-bisphosphatase, chloroplastic [Phalaenopsis equestris]	14	1	XP_020571225.1	AT3G55800	plastid	202829	107279	30617.5	18127.6	6.62462	0.000239466
Dihydrolipoyllysine-residue acetyltransferase component 2 of pyruvate dehydrogenase complex, mitochondrial OS=Arabidopsis thaliana GN=At3g13930 PE=1 SV=2	14	1	Q8RWN9	AT3G13930	mitochondrion	69944.2	20364.2	75916.3	20889	0.921334	0.57354
flavonol 3-O-glucosyltransferase UGT89B1 [Dendrobium catenatum]	14	1	XP_020701692.1	AT1G73880	cytosol	196828	100954	257444	119299	0.764546	0.29599
tropinone reductase homolog At5g06060-like [Phalaenopsis equestris]	14	1	XP_020585446.1	AT5G06060	cytosol	130390	85073.1	137762	50402.4	0.946488	0.838979
cysteine proteinase inhibitor 12-like [Dendrobium catenatum]	14	1	XP_020686176.2	AT3G12490	cytosol	50699.1	20291.5	34399.4	12633.8	1.47384	0.0748651
subtilisin-like protease SBT3.4 [Phalaenopsis equestris]	14	1	XP_020596198.1	AT1G71950	extracellular	44107.1	28062.5	36370.6	10491.8	1.21271	0.487989
nucleolin 2-like isoform X1 [Phalaenopsis equestris]	14	1	XP_020582117.1	AT1G48920	nucleus	83881.5	43030.7	365674	287027	0.229389	0.0195457
protein translation factor SUI1 homolog 1-like [Phalaenopsis equestris]	14	1	XP_020594012.1	AT4G27130	cytosol	34317.1	13567.2	40812.8	14571.2	0.840842	0.395899
peroxidase 51 [Dendrobium catenatum]	14	1	XP_020677581.1	AT4G37530	extracellular	36061.3	10294.4	74697.6	42728.9	0.482763	0.0314871
cationic peroxidase 1 [Dendrobium catenatum]	14	1	XP_020693235.1	AT5G05340	extracellular	120494	92923.6	32878	25447	3.66489	0.224397
mitochondrial dicarboxylate/tricarboxylate transporter DTC-like [Phalaenopsis equestris]	14	1	XP_020572664.1	AT5G19760	mitochondrion	35922.8	30303.8	54410.9	31002.5	0.660212	0.269241
serine hydroxymethyltransferase, mitochondrial isoform X1 [Dendrobium catenatum]	13	1	XP_020703021.1	AT4G37930	mitochondrion	41503.7	18465.6	18565.7	7297.98	2.2355	0.0777012
probable 3-hydroxyisobutyrate dehydrogenase-like 1, mitochondrial [Dendrobium catenatum]	13	1	XP_020680148.1	AT4G29120	mitochondrion	38917.1	20402.2	55224.9	20504.5	0.704702	0.149534
UTP--glucose-1-phosphate uridylyltransferase OS=Pyrus pyrifolia PE=2 SV=1	13	1	O64459	AT5G17310	extracellular	16545.4	0	59002.6	24541.7	0.280418	0.000117685
phosphoenolpyruvate carboxykinase (ATP) [Phalaenopsis equestris]	13	1	XP_020584867.1	AT4G37870	cytosol	93411.7	116959	64306.7	46862.3	1.4526	0.554019
Probable histone H2A.5 OS=Arabidopsis thaliana GN=At5g27670 PE=1 SV=1	13	1	Q94F49	AT5G27670	nucleus	109670	101147	55900.4	45670.9	1.96188	0.176278
T-complex protein 1 subunit gamma [Phalaenopsis equestris]	13	1	XP_020571966.1	AT5G26360	cytosol	27406.9	11173	29231	12602.4	0.937598	0.835282
uncharacterized protein LOC110021396 [Phalaenopsis equestris]	13	1	XP_020575540.1	AT5G15300	cytosol	34500.3	13092.8	37185.6	12788.2	0.927786	0.719244
Probable aldo-keto reductase 1 OS=Arabidopsis thaliana GN=At1g10810 PE=2 SV=1	13	1	Q9C5B9	AT1G10810	peroxisome	0	NA	74143	7852.28	N/A	N/A
Ribulose bisphosphate carboxylase small chain 3A, chloroplastic OS=Pisum sativum GN=RBCS-3A PE=1 SV=1	13	1	P07689	AT5G38430	plastid	292456	166238	106945	66625.2	2.73463	0.0159371	0.763377	1.9244
Calreticulin OS=Berberis stolonifera PE=2 SV=1	13	1	Q9ZPP1	AT1G09210	endoplasmic reticulum	65138.4	6942.28	68668.9	43181.3	0.948586	0.926327
60S ribosomal protein L13-3 OS=Arabidopsis thaliana GN=RPL13D PE=2 SV=1	13	1	Q9FF90	AT5G23900	cytosol	48367.3	28587.2	62086.5	23154	0.779031	0.338081
40S ribosomal protein S9-2 OS=Arabidopsis thaliana GN=RPS9C PE=2 SV=1	13	1	Q9FLF0	AT5G39850	cytosol	21291.8	5780.66	24141.1	13443.6	0.881974	0.816603
Thioredoxin H-type OS=Triticum aestivum PE=1 SV=3	13	1	O64394	AT1G45145	cytosol	52259.7	19822.3	114661	46679	0.455777	0.00421973
probable phospholipid hydroperoxide glutathione peroxidase [Phalaenopsis equestris]	13	1	XP_020586796.1	AT4G11600	mitochondrion	46118	31570.5	103761	83834.2	0.444463	0.101481
Monodehydroascorbate reductase, chloroplastic OS=Arabidopsis thaliana GN=At1g63940 PE=2 SV=3	13	1	P92947	AT1G63940	plastid	127746	43876.3	159797	96307.2	0.79943	0.436373
heterogeneous nuclear ribonucleoprotein A3 homolog 2 [Phalaenopsis equestris]	13	1	XP_020588757.1	AT3G13224	cytosol	36785.8	33940	86536.3	34968.9	0.42509	0.015043
Mitochondrial outer membrane protein porin of 36 kDa OS=Solanum tuberosum PE=1 SV=2	13	1	P42056	AT3G01280	mitochondrion	72500.1	18931.5	115372	37412.2	0.628401	0.0192141
1,2-dihydroxy-3-keto-5-methylthiopentene dioxygenase 1 OS=Physcomitrella patens subsp. patens GN=PHYPADRAFT_128349 PE=3 SV=1	12	1	A9SDW6	AT4G14710	cytosol	43518.6	19522.3	61496.5	20894.3	0.707659	0.112733
3-isopropylmalate dehydratase large subunit, chloroplastic [Dendrobium catenatum]	12	1	XP_020702840.1	AT4G13430	plastid	53766.1	42117.1	48004.8	23261.8	1.12001	0.746684
agmatine deiminase [Phalaenopsis equestris]	12	1	XP_020586394.1	AT5G08170	cytosol	34402.2	5715.6	34899.3	7260.96	0.985755	0.90967
Betaine aldehyde dehydrogenase OS=Oryza sativa subsp. japonica GN=Os04g0464200 PE=2 SV=1	12	1	O24174	AT3G48170	peroxisome	138340	48454.2	139814	45204.6	0.98946	0.950743
S-adenosylmethionine synthase 2 OS=Elaeagnus umbellata GN=SAMS2 PE=2 SV=1	12	1	Q9AT55	AT1G02500	cytosol	25545.3	0	23100	17166.2	1.10586	N/A
Probable phosphoglucomutase, cytoplasmic 2 OS=Arabidopsis thaliana GN=At1g70730 PE=1 SV=1	12	1	Q9SGC1	AT1G70730	cytosol	31201.5	5490.57	31577.4	12490.3	0.988096	0.944962
Probable malate dehydrogenase, glyoxysomal OS=Arabidopsis thaliana GN=At2g22780 PE=1 SV=1	12	1	O82399	AT2G22780	peroxisome	172569	95480.9	80215.4	33543.6	2.15131	0.103487
Malate dehydrogenase, mitochondrial OS=Chlamydomonas reinhardtii PE=3 SV=1	12	1	Q42686	AT1G53240	mitochondrion	94702.4	38737.2	83640.7	33234.3	1.13225	0.562531
DNA-(apurinic or apyrimidinic site) lyase, chloroplastic [Phalaenopsis equestris]	12	1	XP_020600351.1	AT2G41460	plastid	356040	273089	2.04386e+06	1.69412e+06	0.174199	0.0449863
3-ketoacyl-CoA thiolase 2, peroxisomal OS=Arabidopsis thaliana GN=PED1 PE=1 SV=2	12	1	Q56WD9	AT2G33150	peroxisome	82248.5	39630.5	152879	62385.8	0.537999	0.0509723
uncharacterized oxidoreductase At4g09670-like [Dendrobium catenatum]	12	1	XP_020698825.1	AT4G09670	cytosol	24170.1	11141.6	36795.5	9318.67	0.656876	0.0546361
apoptosis-inducing factor homolog B-like [Phalaenopsis equestris]	12	1	XP_020580374.1	AT3G44190	cytosol	48865.5	17998.3	64180.2	21200.6	0.76138	0.144525
fasciclin-like arabinogalactan protein 1 [Dendrobium catenatum]	12	1	XP_020679535.1	AT5G55730	extracellular	48083.2	39549.9	28898.2	22544	1.66388	0.240284
Probable aldo-keto reductase 3 OS=Oryza sativa subsp. indica GN=H0813E03.4 PE=3 SV=1	12	1	A2XRZ6	AT1G60710	cytosol	52473.3	14451.4	58336.3	41936.4	0.899496	0.77361
stem-specific protein TSJT1 [Dendrobium catenatum]	12	1	XP_020672668.1	AT5G43830	cytosol	62936.6	32748.7	61537.4	28398.3	1.02274	0.937855
ubiquitin-activating enzyme E1 1-like [Phalaenopsis equestris]	12	1	XP_020583195.1	AT2G30110	cytosol	38123.9	15232.1	48385.6	17484.3	0.787919	0.234824
Small ubiquitin-related modifier 2 OS=Arabidopsis thaliana GN=SUMO2 PE=1 SV=1	12	1	Q9FLP6	AT5G55160	nucleus	73369.3	31441.4	55459.7	34247.1	1.32293	0.435031
Elongation factor Tu, chloroplastic OS=Arabidopsis thaliana GN=TUFA PE=1 SV=1	12	1	P17745	AT4G20360	plastid	68537	33090.7	85210.5	38344.5	0.804326	0.419683
Pathogenesis-related protein 1 OS=Asparagus officinalis GN=PR1 PE=2 SV=1	12	1	Q05736	AT2G26040	cytosol	373425	378384	180153	92289.8	2.07282	0.339596
Cysteine desulfurase 1, mitochondrial OS=Arabidopsis thaliana GN=NIFS PE=1 SV=1	12	1	O49543	AT5G65720	mitochondrion	90025.5	52404.7	61594.4	51792.7	1.46159	0.369646
nuclear transport factor 2-like [Phalaenopsis equestris]	12	1	XP_020580662.1	AT1G27970	nucleus	86944.5	28688.4	172612	64485.7	0.5037	0.00740466
alpha-soluble NSF attachment protein-like [Phalaenopsis equestris]	12	1	XP_020577536.1	AT3G56190	vacuole	48051.4	11366.6	61196.8	15894.1	0.785195	0.081679
3-isopropylmalate dehydratase large subunit, chloroplastic [Phalaenopsis equestris]	11	1	XP_020584659.1	AT4G13430	plastid	20864.9	13069.8	33789.6	23199.6	0.617493	0.675369
sedoheptulose-1,7-bisphosphatase, chloroplastic [Dendrobium catenatum]	11	1	XP_020694759.1	AT3G55800	plastid	34048.4	17899	17758.6	9339.46	1.9173	0.24476
Probable histone H2A.7 OS=Arabidopsis thaliana GN=At5g59870 PE=1 SV=1	11	1	Q9FJE8	AT5G59870	nucleus	56147.1	6127.85	33236.9	17237.2	1.6893	0.127891
3-ketoacyl-CoA thiolase 1, peroxisomal OS=Arabidopsis thaliana GN=KAT1 PE=1 SV=2	11	1	Q8LF48	AT1G04710	peroxisome	58408.2	15378.7	84367.8	90619.6	0.692304	0.665852
adenylosuccinate synthetase, chloroplastic [Dendrobium catenatum]	11	1	XP_028553296.1	AT3G57610	plastid	25363.9	10043	22292.6	8688.88	1.13777	0.628105
nitrile-specifier protein 5 [Dendrobium catenatum]	11	1	XP_020696927.1	AT3G07720	cytosol	30432.6	23419.7	60886.7	40032.7	0.499823	0.167134
2-alkenal reductase (NADP(+)-dependent)-like [Phalaenopsis equestris]	11	1	XP_020590013.1	AT3G03080	cytosol	185458	100528	101881	12455.3	1.82033	0.177231
uncharacterized protein LOC110033523 [Phalaenopsis equestris]	11	1	XP_020593195.1	AT4G19880	plastid	27854.6	6822.28	34042.6	8176.67	0.818228	0.197926
uncharacterized protein LOC110025981 [Phalaenopsis equestris]	11	1	XP_020582355.1	AT3G47090	vacuole	27686.1	17625.8	42434.9	30848.4	0.652438	0.290599
ATP synthase subunit alpha, plastid OS=Aneura mirabilis GN=atpA PE=3 SV=1	11	1	B0YPM5	ATCG00120	plastid	40315.8	21877.4	50344	29325.6	0.800806	0.59293
peptidyl-prolyl cis-trans isomerase-like [Phalaenopsis equestris]	11	1	XP_020589601.1	AT3G62030	plastid	63622.4	24459.2	62926.2	25143.7	1.01106	0.95627
signal recognition particle 9 kDa protein [Phalaenopsis equestris]	11	1	XP_020587228.1	AT3G49100	cytosol	32217.7	14673.6	32883.3	9757.6	0.979761	0.923998
60S ribosomal protein L13-1 OS=Brassica napus PE=2 SV=1	11	1	P41128	AT3G49010	cytosol	134486	44388	94315.5	50758.4	1.42591	0.115917
40S ribosomal protein S3-2 OS=Arabidopsis thaliana GN=RPS3B PE=1 SV=1	11	1	Q9M339	AT3G53870	cytosol	27369.6	9395.49	28087	5482.44	0.974458	0.85119
GDP-mannose 3,5-epimerase OS=Arabidopsis thaliana GN=At5g28840 PE=1 SV=1	11	1	Q93VR3	AT5G28840	cytosol	49556.1	20230.6	27235.3	10010	1.81955	0.137585
peroxidase P7 isoform X2 [Dendrobium catenatum]	11	1	XP_020678751.1	AT5G05340	extracellular	18041.6	12533.8	33640.7	15445.3	0.536304	0.424407
peroxidase P7-like [Phalaenopsis equestris]	11	1	XP_020587204.1	AT5G05340	extracellular	54871	31876	72268.4	42565.9	0.759267	0.474217
probable small nuclear ribonucleoprotein G [Dendrobium catenatum]	11	1	XP_020692433.1	AT2G23930	cytosol	31111.8	14120	36609.3	18008.5	0.849833	0.567143
Mitochondrial outer membrane protein porin 4 OS=Oryza sativa subsp. japonica GN=VDAC4 PE=3 SV=3	11	1	Q0JJV1	AT3G01280	mitochondrion	152310	83783.6	154431	48699	0.986265	0.950322
succinate-semialdehyde dehydrogenase, mitochondrial [Dendrobium catenatum]	10	1	XP_020680925.1	AT1G79440	mitochondrion	133653	31864.8	89164.7	23218.8	1.49894	0.00526812
tryptophan synthase alpha chain [Dendrobium catenatum]	10	1	XP_028556278.1	AT4G02610	cytosol	21884.3	8962.72	28318.6	10296.5	0.772786	0.20708
LOW QUALITY PROTEIN: threonine synthase, chloroplastic-like, partial [Phalaenopsis equestris]	10	1	XP_020583842.1	AT4G29840	plastid	20604.8	11813.5	27827.3	12993.7	0.740451	0.267033
S-adenosylmethionine synthase OS=Camellia sinensis GN=SAM PE=2 SV=1	10	1	Q9LDQ7	AT1G02500	cytosol	70928.5	46310.2	87602.1	35067.1	0.809666	0.611948
phosphoserine aminotransferase 2, chloroplastic-like [Dendrobium catenatum]	10	1	XP_020705209.2	AT4G35630	plastid	19882.2	12781.8	24528	11031	0.810592	0.759588
Glucose-6-phosphate 1-dehydrogenase, cytoplasmic isoform 2 OS=Arabidopsis thaliana GN=ACG12 PE=1 SV=1	10	1	Q9FJI5	AT5G40760	cytosol	216893	153121	137983	47280.7	1.57188	0.165736
pyrophosphate--fructose 6-phosphate 1-phosphotransferase subunit beta 1 [Dendrobium catenatum]	10	1	XP_020699342.2	AT1G12000	golgi	20180.9	9128.28	22140.2	10531.7	0.911504	0.700169
wound-induced basic protein [Phalaenopsis equestris]	10	1	XP_020589605.1	AT3G07230	cytosol	66497	22571.1	96391.5	31560.5	0.689864	0.11797
Chaperone protein ClpB1 OS=Oryza sativa subsp. japonica GN=CLPB1 PE=2 SV=1	10	1	Q6F2Y7	AT1G74310	cytosol	27710.8	15697	23237.3	16956.3	1.19251	0.669929
uridine kinase-like protein 1, chloroplastic [Dendrobium catenatum]	10	1	XP_020691067.1	AT3G27190	plastid	19869.4	4986.23	25278.1	6255.44	0.786034	0.094036
uncharacterized protein LOC110030935 [Phalaenopsis equestris]	10	1	XP_020589591.1	AT1G02816	extracellular	29405.1	13721.8	40999	35979.7	0.717213	0.528483
uncharacterized protein LOC110095522 [Dendrobium catenatum]	10	1	XP_020676764.2	AT4G37560	cytosol	48686.8	14843.5	55623.6	36680.3	0.87529	0.662551
leucine aminopeptidase isoform X1 [Dendrobium catenatum]	10	1	XP_028555559.1	AT5G13520	plasma membrane	65058.9	37816.7	56004.4	10050.5	1.16167	0.681055
E3 ubiquitin-protein ligase UPL3-like [Dendrobium catenatum]	10	1	XP_020700874.1	AT4G38600	golgi	1.00189e+06	614290	1.52625e+06	1.15536e+06	0.65644	0.298086
Probable pectinesterase/pectinesterase inhibitor 17 OS=Arabidopsis thaliana GN=PME17 PE=2 SV=2	10	1	O22149	AT2G45220	extracellular	827576	413634	518976	299346	1.59463	0.103014
peptidyl-prolyl cis-trans isomerase E-like [Dendrobium catenatum]	10	1	XP_028556038.1	AT3G62030	plastid	40055.5	6699.85	38930.3	15612.1	1.0289	0.925066
annexin-like protein RJ4 [Dendrobium catenatum]	10	1	XP_020679870.1	AT5G12380	cytosol	33836.3	14844.3	49227.9	17654.7	0.687341	0.152111
uncharacterized protein LOC110023404 [Phalaenopsis equestris]	10	1	XP_020578469.1	AT5G17710	plastid	23957.3	7652.52	26621.7	7882.97	0.899916	0.505872
bifunctional aspartate aminotransferase and glutamate/aspartate-prephenate aminotransferase [Phalaenopsis equestris]	9	1	XP_020573684.1	AT2G22250	plastid	28656.2	14751.6	40893.6	25916.1	0.700749	0.482112
carbamoyl-phosphate synthase large chain, chloroplastic [Dendrobium catenatum]	9	1	XP_020681084.1	AT1G29900	plastid	34567.3	2746	33921.3	19023.5	1.01904	0.967498
Probable 6-phosphogluconolactonase 4, chloroplastic OS=Oryza sativa subsp. indica GN=OsI_031067 PE=3 SV=2	9	1	A2Z3C4	AT5G24400	plastid,peroxisome	26466.8	11460	35508.2	10515.2	0.74537	0.120117
isoamylase 3, chloroplastic [Phalaenopsis equestris]	9	1	XP_020581014.1	AT4G09020	plastid	49501.7	5630.24	46586.2	11149.8	1.06258	0.710546
Cellulose synthase-like protein D1 OS=Oryza sativa subsp. japonica GN=CSLD1 PE=2 SV=1	9	1	Q8W3F9	AT3G03050	plasma membrane,golgi	193411	202307	547634	378970	0.353175	0.0389275
protein argonaute 1C-like [Dendrobium catenatum]	9	1	XP_020679738.2	AT1G48410	nucleus	36715.1	31778.7	34298.5	15573.1	1.07046	0.876919
(S)-2-hydroxy-acid oxidase GLO1 [Dendrobium catenatum]	9	1	XP_020679229.1	AT3G14420	peroxisome	114584	72479.2	21528	18895.1	5.32254	0.00736374
glycine cleavage system H protein 2, mitochondrial [Dendrobium catenatum]	9	1	XP_020701443.1	AT2G35120	mitochondrion	67880.1	63043.7	40560.2	16257	1.67357	0.36795
2-hydroxyacyl-CoA lyase [Dendrobium catenatum]	9	1	XP_020703194.1	AT5G17380	peroxisome	31845.4	5459.16	36010.1	15643.8	0.884347	0.599642
LOW QUALITY PROTEIN: protein FLX-like 3 [Phalaenopsis equestris]	9	1	XP_020590033.1	AT1G55170	nucleus	91588.7	76353.8	143210	98175.6	0.639541	0.266624
cinnamoyl-CoA reductase 1-like [Phalaenopsis equestris]	9	1	XP_020592272.1	AT5G19440	cytosol	60251.9	35986.6	76292	23045.2	0.789753	0.309729
Serine carboxypeptidase-like OS=Oryza sativa subsp. japonica GN=CBP31 PE=2 SV=2	9	1	P52712	AT3G10410	vacuole	36391.4	16757	47738.5	42874.8	0.762307	0.604358
peptidyl-prolyl cis-trans isomerase FKBP12 [Phalaenopsis equestris]	9	1	XP_020585132.1	AT5G64350	cytosol	43213.6	32404.7	54227.1	43018	0.796901	0.719117
eukaryotic translation initiation factor 3 subunit D-like [Phalaenopsis equestris]	9	1	XP_020582174.1	AT4G20980	cytosol	38134.8	11378	43270	22321.2	0.881321	0.659745
Elongation factor 2 OS=Parachlorella kessleri PE=2 SV=1	9	1	P28996	AT1G56070	cytosol	209985	186656	254099	61302.8	0.826391	0.710769
60S ribosomal protein L35 OS=Euphorbia esula GN=RPL35 PE=2 SV=1	9	1	Q9M5L0	AT3G09500	cytosol	26922.8	8289.59	35587	16104.1	0.756535	0.278483
60S ribosomal protein L27a-3 [Phalaenopsis equestris]	9	1	XP_020582435.1	AT1G70600	cytosol	38352.3	20072.2	34376.4	16592.1	1.11566	0.762465
glycine-rich RNA-binding protein 3, mitochondrial-like [Phalaenopsis equestris]	9	1	XP_020591064.1	AT5G61030	mitochondrion	45809.7	26552.7	56686.8	20901.6	0.80812	0.563379
heterogeneous nuclear ribonucleoprotein 1-like isoform X1 [Phalaenopsis equestris]	9	1	XP_020584914.1	AT4G14300	nucleus	120988	56548.9	102522	57268.6	1.18012	0.600665
mitochondrial import receptor subunit TOM6 homolog [Dendrobium catenatum]	9	1	XP_020680865.1	AT1G49410	mitochondrion	29791.7	13083.4	39285.5	23626.8	0.758339	0.35124
bifunctional aspartokinase/homoserine dehydrogenase 1, chloroplastic-like [Phalaenopsis equestris]	8	1	XP_020590374.1	AT1G31230	plastid	32601.9	26181.8	20327.3	5189.47	1.60385	0.336575
ribulose-phosphate 3-epimerase, cytoplasmic isoform isoform X1 [Dendrobium catenatum]	8	1	XP_020685016.1	AT1G63290	cytosol	20486	16182.2	29182	8312.21	0.702006	0.297309
Phosphoglycerate kinase 2, chloroplastic OS=Arabidopsis thaliana GN=At1g56190 PE=1 SV=3	8	1	P50318	AT1G56190	plastid	0	NA	37187.4	0	N/A	N/A
translationally-controlled tumor protein homolog [Dendrobium catenatum]	8	1	XP_020689138.1	AT3G05540	cytosol	436605	279117	703187	172586	0.620896	0.305495
isocitrate dehydrogenase [NAD] regulatory subunit 1, mitochondrial-like [Dendrobium catenatum]	8	1	XP_020685799.1	AT4G35260	mitochondrion	23383.8	9467.6	29938.8	5484.76	0.781055	0.111535	-0.702379	2.26035
actin-depolymerizing factor 11-like [Phalaenopsis equestris]	8	1	XP_020600164.1	AT2G31200	cytosol	23688.6	8742.74	33301.8	17593.7	0.711332	0.368796
cytochrome c1-2, heme protein, mitochondrial [Phalaenopsis equestris]	8	1	XP_020584513.1	AT5G40810	mitochondrion	24856.5	8157.56	25705.4	5014.54	0.966977	0.883001
LOW QUALITY PROTEIN: probable acyl-activating enzyme 5, peroxisomal [Phalaenopsis equestris]	8	1	XP_020593480.1	AT5G16370	peroxisome	43150.7	28744.3	29224.3	11571	1.47653	0.237064
probable enoyl-CoA hydratase 1, peroxisomal [Phalaenopsis equestris]	8	1	XP_020572558.1	AT4G16210	peroxisome	38134.4	13227.3	43954.6	12190.2	0.867587	0.457038
Linoleate 9S-lipoxygenase 6 (Fragment) OS=Solanum tuberosum GN=LOX1.6 PE=1 SV=1	8	1	Q41238	AT1G55020	golgi	73378.8	799.691	63151.7	42235.2	1.16195	0.808015
long chain acyl-CoA synthetase 9, chloroplastic [Dendrobium catenatum]	8	1	XP_028551695.1	AT1G77590	plastid	29386.2	17212.2	27139.1	17572.4	1.0828	0.834286
uncharacterized protein LOC110113701 isoform X1 [Dendrobium catenatum]	8	1	XP_020702035.1	AT3G01980	peroxisome	49052.6	37497.6	86129.8	50759.9	0.56952	0.264531
leukotriene A-4 hydrolase homolog [Phalaenopsis equestris]	8	1	XP_020579636.1	AT5G13520	plasma membrane	28597.9	12715.8	58243.6	13611.3	0.491005	0.00545504
ubiquitin-like protein 5 [Dendrobium catenatum]	8	1	XP_028547850.1	AT5G42300	cytosol	80463	90176.8	110541	107495	0.727899	0.558967
Proteasome subunit alpha type-4-1 OS=Oryza sativa subsp. indica GN=OsI_021120 PE=1 SV=2	8	1	A2Y9X7	AT3G22110	nucleus,cytosol	567853	543329	644456	595188	0.881136	0.793752
Elongation factor Tu, chloroplastic OS=Nicotiana tabacum GN=TUFA PE=3 SV=1	8	1	P68158	AT4G20360	plastid	41752.2	12204.4	18328.7	7638.24	2.27797	0.0204516
40S ribosomal protein S24-1 [Phalaenopsis equestris]	8	1	XP_020593924.1	AT3G04920	cytosol	38086.1	14259.3	45974.3	36463.9	0.828421	0.642538
uncharacterized protein LOC110093840 [Dendrobium catenatum]	8	1	XP_020674512.1	AT2G32090	cytosol	30248.9	4923.7	13791.4	2397.41	2.19332	1.47088e-06
glutathione S-transferase DHAR2-like [Phalaenopsis equestris]	8	1	XP_020584587.1	AT5G16710	plastid	75505.7	41591.1	53128.1	43705.2	1.4212	0.373338
peroxidase 5-like [Dendrobium catenatum]	8	1	XP_020687124.2	AT3G21770	extracellular	57996.7	24893.5	62833.7	87773.9	0.923018	0.904434
RGG repeats nuclear RNA binding protein B-like, partial [Phalaenopsis equestris]	8	1	XP_020574937.1	AT4G17520	nucleus	21244.1	8672.58	17239.8	5931.18	1.23227	0.290349
flowering locus K homology domain isoform X1 [Dendrobium catenatum]	8	1	XP_020690761.1	AT3G04610	nucleus	32674.3	4542.5	28530.9	23809.2	1.14523	0.790031
Glutamine synthetase root isozyme A OS=Pisum sativum GN=GS3A PE=2 SV=1	7	1	P07694	AT5G37600	cytosol	26166.2	20102	35814.4	18436.2	0.730607	0.466698
tryptophan synthase beta chain 1 [Phalaenopsis equestris]	7	1	XP_020591337.1	AT5G54810	plastid	19063.9	3857.92	21628.4	7323.45	0.881429	0.57064
Sucrose synthase OS=Vigna radiata var. radiata GN=SS1 PE=1 SV=1	7	1	Q01390	AT3G43190	cytosol	37313.9	28356.3	42660.2	48343.5	0.874676	0.853163
xyloglucan endotransglucosylase/hydrolase protein 24-like [Dendrobium catenatum]	7	1	XP_020697143.1	AT4G25810	extracellular	34098.4	15432.3	43071.3	31708.3	0.791673	0.635708
vacuolar-sorting protein BRO1 [Dendrobium catenatum]	7	1	XP_028548410.1	AT1G15130	nucleus	27567.7	7869.94	31265.7	12547.1	0.881723	0.584441
NADH dehydrogenase [ubiquinone] iron-sulfur protein 1, mitochondrial [Phalaenopsis equestris]	7	1	XP_020588123.1	AT5G37510	mitochondrion	27357.1	12447.2	36980.7	15854.6	0.739766	0.292196
Chaperone protein ClpB2, chloroplastic OS=Oryza sativa subsp. japonica GN=CLPB2 PE=2 SV=1	7	1	Q75GT3	AT5G15450	plastid	30546.3	14824.1	33472.7	18475	0.912572	0.759962
farnesyl diphosphate synthase 1 [Dendrobium catenatum]	7	1	XP_020678044.1	AT5G47770	cytosol	33829.4	7512.39	32839.9	24640.3	1.03013	0.945111
enoyl-CoA hydratase 2, peroxisomal isoform X2 [Phalaenopsis equestris]	7	1	XP_020579309.1	AT1G76150	peroxisome	24090.3	8544.8	35222.7	4978.83	0.683943	0.0683405
peroxisomal fatty acid beta-oxidation multifunctional protein-like, partial [Phalaenopsis equestris]	7	1	XP_020595327.1	AT4G29010	peroxisome	109218	55578.8	129645	72367.2	0.842433	0.563845
uridine 5'-monophosphate synthase [Phalaenopsis equestris]	7	1	XP_020585580.1	AT3G54470	golgi	16625	6801.52	30304.3	19584.7	0.548601	0.116265
probable pyridoxal 5'-phosphate synthase subunit PDX1 [Phalaenopsis equestris]	7	1	XP_020570641.1	AT5G01410	cytosol	22915.6	12128.1	35256.8	9942.6	0.649961	0.0661862	-0.744246	2.34867
auxin-repressed 12.5 kDa protein-like [Phalaenopsis equestris]	7	1	XP_020578501.1	AT2G33830	peroxisome	41457	25713.7	27480	10260.6	1.50862	0.317835
uncharacterized protein At2g34160-like [Phalaenopsis equestris]	7	1	XP_020584183.1	AT2G34160	cytosol	46930.4	30790.6	33134.7	15252.1	1.41635	0.328565
polyphenol oxidase, chloroplastic-like [Phalaenopsis equestris]	7	1	XP_020584709.1	AT2G02103	cytosol	38788.7	18400.7	50524	30139.5	0.767728	0.486919
uncharacterized protein LOC110110380 isoform X1 [Dendrobium catenatum]	7	1	XP_020697481.1	AT5G64250	cytosol	26202.8	13150.1	22319	6981.07	1.17401	0.615994
cytochrome P450 714B3 [Dendrobium catenatum]	7	1	XP_020681319.1	AT5G24910	endoplasmic reticulum	38726.9	13460	42561.6	11238.2	0.909902	0.616808
26S proteasome non-ATPase regulatory subunit 8 homolog A-like [Phalaenopsis equestris]	7	1	XP_020573273.1	AT1G64520	nucleus,cytosol	19511.1	2412.54	22576.9	8774.05	0.864203	0.568362
Calnexin homolog 1 OS=Arabidopsis thaliana GN=CNX1 PE=1 SV=1	7	1	P29402	AT5G61790	endoplasmic reticulum	60527.7	54378.2	25869.1	14505.7	2.33977	0.0873616
40S ribosomal protein S26-2 [Dendrobium catenatum]	7	1	XP_020674905.1	AT3G56340	cytosol	22845.5	10064.6	62275	30667.3	0.366848	0.00461764
60S ribosomal protein L18a OS=Oryza sativa subsp. japonica GN=RPL18A PE=2 SV=1	7	1	Q943F3	AT2G34480	cytosol	25524.8	10460.2	50624.6	29676.3	0.504197	0.0470955
60S ribosomal protein L27-like [Phalaenopsis equestris]	7	1	XP_020589946.1	AT4G15000	cytosol	31235.5	17226.8	40948.6	21393.5	0.762799	0.351907
60S ribosomal protein L26-2-like [Phalaenopsis equestris]	7	1	XP_020595618.1	AT5G67510	cytosol	61349	19896.2	62739.6	20226.6	0.977835	0.91571
DEAD-box ATP-dependent RNA helicase 9, mitochondrial [Dendrobium catenatum]	7	1	XP_020700422.1	AT3G22330	mitochondrion	15547.6	6835.33	28766.6	20296.4	0.540474	0.175736
polyadenylate-binding protein 2-like [Dendrobium catenatum]	7	1	XP_020700719.1	AT4G34110	nucleus	23182.6	14826.4	19724.9	6264.58	1.17529	0.580685
ACT domain-containing protein ACR12-like isoform X1 [Phalaenopsis equestris]	6	1	XP_020582090.1	AT5G04740	plastid	41179.5	23066.8	46447.7	19017.2	0.886579	0.623419
glyceraldehyde-3-phosphate dehydrogenase B, chloroplastic-like [Phalaenopsis equestris]	6	1	XP_020596962.1	AT1G42970	plastid	18290.7	6198.44	6308.14	0	2.89954	0.0261522
ATPase GET3-like [Phalaenopsis equestris]	6	1	XP_020599677.1	AT3G10350	plastid	39573.7	15673.5	23988.6	10486.4	1.64969	0.160357
probable NADH dehydrogenase [ubiquinone] 1 alpha subcomplex subunit 5, mitochondrial [Phalaenopsis equestris]	6	1	XP_020586873.1	AT5G52840	mitochondrion	20969.8	8817.18	19934.5	6085.99	1.05194	0.785209
peroxisomal (S)-2-hydroxy-acid oxidase GLO5 [Dendrobium catenatum]	6	1	XP_020687733.1	AT3G14420	peroxisome	41961.9	16172.4	26909.3	8289.68	1.55938	0.155298
T-complex protein 1 subunit epsilon OS=Avena sativa PE=2 SV=1	6	1	P40412	AT1G24510	cytosol	38622.1	11290.6	25508.1	7218.29	1.51411	0.341409
LOW QUALITY PROTEIN: geranylgeranyl pyrophosphate synthase, chloroplastic/chromoplastic-like [Phalaenopsis equestris]	6	1	XP_020570606.1	AT4G36810	plastid	20657.1	16561.9	23792.3	9512.26	0.868226	0.659736
Biotin carboxyl carrier protein of acetyl-CoA carboxylase 2, chloroplastic OS=Arabidopsis thaliana GN=BCCP2 PE=1 SV=1	6	1	Q9LLC1	AT5G15530	plastid	63388.6	101417	24890.7	8193.82	2.54668	0.279357
long chain base biosynthesis protein 1b [Dendrobium catenatum]	6	1	XP_020684269.1	AT4G36480	endoplasmic reticulum	19755.6	5990.53	20652.4	8096.65	0.956577	0.915234
ribose-phosphate pyrophosphokinase 4 [Dendrobium catenatum]	6	1	XP_020696297.2	AT2G42910	cytosol	12518	8247.68	18648	11137.8	0.671279	0.527763
uncharacterized protein LOC110112157 [Dendrobium catenatum]	6	1	XP_020699925.2	AT5G63400	mitochondrion	19698.2	2551.97	25506.5	12043.5	0.772283	0.611128
Cyanate hydratase OS=Medicago truncatula GN=CYN PE=2 SV=1	6	1	B7FKW7	AT3G23490	mitochondrion	64431.2	27882.6	26757.1	10183.4	2.408	0.0134434
heavy metal-associated isoprenylated plant protein 39-like [Phalaenopsis equestris]	6	1	XP_020573334.1	AT1G01490	nucleus	29458.1	8690.33	43585.6	18375	0.675868	0.277057
uncharacterized protein LOC110109558 [Dendrobium catenatum]	6	1	XP_020696333.2	AT3G55290	peroxisome	18743.7	8007.2	17044.7	9061.56	1.09968	0.785838
uncharacterized oxidoreductase At4g09670-like [Phalaenopsis equestris]	6	1	XP_020586746.1	AT4G09670	cytosol	24716.5	10932.8	25754.5	8788.51	0.959697	0.862689
probable aspartyl aminopeptidase [Dendrobium catenatum]	6	1	XP_020675247.1	AT5G60160	vacuole	17194.3	288.413	21971.9	6675.82	0.782557	0.455228
ATP-dependent Clp protease proteolytic subunit 5, chloroplastic OS=Arabidopsis thaliana GN=CLPP5 PE=1 SV=1	6	1	Q9S834	AT1G02560	plastid	226810	59690.2	155408	102978	1.45945	0.541673
oryzain alpha chain [Dendrobium catenatum]	6	1	XP_020701542.1	AT5G43060	extracellular	21967.9	17708.6	22190.1	8844.26	0.989985	0.977188
proteasome subunit beta type-7-A [Dendrobium catenatum]	6	1	XP_020703071.1	AT3G27430	nucleus,cytosol	126533	15583.2	108391	31659.1	1.16738	0.181019
serpin-Z1C-like [Phalaenopsis equestris]	6	1	XP_020596943.1	AT1G47710	cytosol	71826.7	27420.6	99015.2	57414.4	0.725411	0.262561
Elongation factor Tu, mitochondrial OS=Arabidopsis thaliana GN=TUFA PE=1 SV=1	6	1	Q9ZT91	AT4G02930	mitochondrion	43980.6	11069.2	31152	5180.34	1.41181	0.270123
probable nucleolar protein 5-2 [Phalaenopsis equestris]	6	1	XP_020585101.1	AT5G27120	nucleus	25201.2	15169.8	72126.6	29007.1	0.349402	0.100892
60S ribosomal protein L13a-2 [Phalaenopsis equestris]	6	1	XP_020591121.1	AT3G24830	cytosol	24012.5	18373.2	36455.3	12745.2	0.658685	0.193685
probable nucleolar protein 5-2 [Dendrobium catenatum]	6	1	XP_028556174.1	AT3G05060	nucleus	24977.8	16351.7	30549.9	24499.3	0.817606	0.721849
60S ribosomal protein L7a-2 OS=Arabidopsis thaliana GN=RPL7AB PE=1 SV=1	6	1	Q9LZH9	AT3G62870	cytosol	36027.4	30624	35690.2	17059.5	1.00945	0.981736
peroxidase 51-like [Dendrobium catenatum]	6	1	XP_020679477.1	AT4G37530	extracellular	34747.6	26441.8	72979.6	27212.2	0.476127	0.0844912
mitogen-activated protein kinase 2 [Dendrobium catenatum]	6	1	XP_020691610.1	AT4G01370	nucleus,cytosol	24710.7	7716.69	38121	11758.2	0.648217	0.243962
nucleolar protein 56-like [Dendrobium catenatum]	6	1	XP_020690066.2	AT1G56110	nucleus	42660.3	23576.9	43714.8	24941.3	0.975877	0.939004
mitochondrial pyruvate carrier 1 [Phalaenopsis equestris]	6	1	XP_020590453.1	AT5G20090	mitochondrion	21837.7	7012.66	23484.9	8334.75	0.929858	0.770015
LOW QUALITY PROTEIN: protein TOC75-3, chloroplastic-like [Phalaenopsis equestris]	6	1	XP_020584824.1	AT3G46740	plastid	30436.5	23044.9	30549.1	15608.2	0.996312	0.991467
Gamma aminobutyrate transaminase 1, mitochondrial OS=Solanum lycopersicum GN=GABA-TP1 PE=1 SV=1	5	1	Q84P54	AT3G22200	mitochondrion	28089.8	694.559	21932.3	13710.5	1.28075	0.592984
Argininosuccinate synthase, chloroplastic OS=Arabidopsis thaliana GN=At4g24830 PE=2 SV=3	5	1	Q9SZX3	AT4G24830	plastid	13615.8	1946.73	15750.4	5154.55	0.864471	0.66809
Glutamate decarboxylase 1 OS=Arabidopsis thaliana GN=GAD1 PE=1 SV=2	5	1	Q42521	AT5G17330	cytosol	38417.2	21006.8	32151.8	22851.6	1.19487	0.7198
chorismate synthase, chloroplastic [Phalaenopsis equestris]	5	1	XP_020584917.1	AT1G48850	plastid	21786	4080.86	19058.5	21921.6	1.14311	0.817047
plastidial pyruvate kinase 1, chloroplastic-like isoform X1 [Dendrobium catenatum]	5	1	XP_020676832.1	AT3G22960	plastid	22180.4	9105.17	18745.8	6522.24	1.18322	0.464577
phosphomannomutase isoform X1 [Dendrobium catenatum]	5	1	XP_028549867.1	AT2G45790	mitochondrion,cytosol	23409.4	5229.18	32166.6	33495.5	0.727752	0.750091
beta-galactosidase 6 [Dendrobium catenatum]	5	1	XP_020698046.1	AT2G28470	extracellular	28299.6	0	26220.6	15077.3	1.07929	N/A
putative glucose-6-phosphate 1-epimerase [Dendrobium catenatum]	5	1	XP_020685624.1	AT5G57330	cytosol	49210.6	0	30899.7	4544.76	1.59259	N/A
fumarate hydratase 1, mitochondrial [Phalaenopsis equestris]	5	1	XP_020585816.1	AT2G47510	mitochondrion	36904.3	36325.4	12121.2	3665.75	3.04461	0.510407
villin-2-like isoform X1 [Phalaenopsis equestris]	5	1	XP_020575018.1	AT2G41740	cytosol	12357.5	5336.92	32160.7	39248.2	0.384241	0.269513
histone deacetylase HDT2 isoform X1 [Dendrobium catenatum]	5	1	XP_020683665.1	AT3G44750	nucleus	42596.2	38730.8	63747.1	34477.6	0.668206	0.393977
diphosphomevalonate decarboxylase MVD2, peroxisomal isoform X1 [Dendrobium catenatum]	5	1	XP_028548817.1	AT3G54250	cytosol	19157.9	9476.3	47749.8	19263.7	N/A	N/A
uncharacterized protein LOC110110726 [Dendrobium catenatum]	5	1	XP_020697987.1	AT2G30200	plastid	21257.2	107.328	20980.7	11345.9	1.01318	0.978898
uncharacterized protein LOC110100310 [Dendrobium catenatum]	5	1	XP_020683414.1	AT5G13210	golgi,cytosol	18923.1	9547.75	42824.1	23339.7	0.44188	0.0420891
uncharacterized protein LOC110095497 [Dendrobium catenatum]	5	1	XP_020676721.1	AT4G37550	cytosol	20571.9	7289.24	10765.6	3104.32	1.91089	0.0897938
gamma carbonic anhydrase-like 2, mitochondrial [Dendrobium catenatum]	5	1	XP_020705541.1	AT3G48680	mitochondrion	48912.7	30893.1	37012.4	21790.2	1.32152	0.41275
putative pentatricopeptide repeat-containing protein At1g19290 [Dendrobium catenatum]	5	1	XP_028551724.1	AT1G19290	mitochondrion	40679.3	36642.1	54048.4	27943.9	0.752647	0.435653
perakine reductase-like [Phalaenopsis equestris]	5	1	XP_020579759.1	AT1G60690	cytosol	24768.8	8158.78	24422.9	13243.5	1.01416	0.965617
embryo-specific protein ATS3A-like [Phalaenopsis equestris]	5	1	XP_020592650.1	AT5G62200	vacuole	414132	0	0	NA	N/A	N/A
Photosystem II CP47 chlorophyll apoprotein OS=Acorus calamus GN=psbB PE=3 SV=1	5	1	Q3V508	ATCG00680	plastid	12126	6399.52	37607.6	39316.2	0.322434	0.274461
photosystem II protein D2 (chloroplast) [Phalaenopsis equestris]	5	1	YP_006073263.1	ATCG00270	plastid	17117.1	1454.92	57980.2	45779.8	0.295222	0.334903
photosystem II protein D1 (chloroplast) [Phalaenopsis equestris]	5	1	YP_006073248.1	ATCG00020	plastid	46123.6	19028.3	31824.7	18100.6	1.4493	0.504707
26S proteasome non-ATPase regulatory subunit 1 homolog A [Dendrobium catenatum]	5	1	XP_020692029.1	AT1G04810	nucleus,cytosol	24183.3	11378.6	30831.5	12383.3	0.784372	0.451955
polygalacturonase inhibitor 2-like [Phalaenopsis equestris]	5	1	XP_020597565.1	AT5G06870	extracellular	26591.2	9245.87	26424.5	18726.8	1.00631	0.98509
FK506-binding protein 2-like isoform X1 [Phalaenopsis equestris]	5	1	XP_020599951.1	AT3G25220	endoplasmic reticulum	46171.2	20997	32829	14184.1	1.40641	0.435703
glutathione synthetase, chloroplastic [Dendrobium catenatum]	5	1	XP_020679976.1	AT5G27380	plastid,cytosol	20641.5	7930.79	29913.3	20885.6	0.690045	0.298451
Catalase isozyme 1 OS=Zea mays GN=CAT1 PE=2 SV=1	5	1	P18122	AT4G35090	peroxisome	33604.1	18890.6	18716.7	2281.91	1.79541	0.0574237
probable serine/threonine-protein kinase BSK3 [Phalaenopsis equestris]	5	1	XP_020574618.1	AT5G59010	plasma membrane	20418.8	12288.1	21116.5	8583.21	0.966957	0.957478
ATP-sulfurylase 3, chloroplastic-like [Phalaenopsis equestris]	5	1	XP_020590538.1	AT4G14680	plastid	33416.3	17537.2	24671.4	10668.6	1.35446	0.467607
reticulon-like protein B2 [Phalaenopsis equestris]	5	1	XP_020574950.1	AT4G11220	endoplasmic reticulum	22841.9	19805	32480	22262.4	0.70326	0.459179
DEAD-box ATP-dependent RNA helicase 24 [Dendrobium catenatum]	5	1	XP_020680095.1	AT2G47330	nucleus	42391.1	33545.5	48943.3	15053.4	0.866127	0.644562
mitochondrial import inner membrane translocase subunit TIM10 [Phalaenopsis equestris]	5	1	XP_020595813.1	AT2G29530	mitochondrion	27707.4	6495.02	50431.8	18563.7	0.549402	0.287677
protein TIC 40, chloroplastic-like isoform X1 [Phalaenopsis equestris]	5	1	XP_020577979.1	AT5G16620	plastid	38311.1	23260.9	22042.8	11017.4	1.73803	0.38703
transmembrane protein 184C-like isoform X1 [Dendrobium catenatum]	5	1	XP_020682712.1	AT4G21570	endoplasmic reticulum	16796.5	14510.1	19489.1	13613.3	0.86184	0.790547
3-dehydroquinate synthase, chloroplastic [Phalaenopsis equestris]	4	1	XP_020585545.1	AT5G66120	peroxisome	3281.23	0	106443	95446.4	0.0308261	0.0107775
Alpha-glucan water dikinase, chloroplastic OS=Citrus reticulata GN=R1 PE=2 SV=1	4	1	Q8LPT9	AT1G10760	plastid	91056.1	40151.5	116256	34461.7	0.783237	0.384755
glucose-6-phosphate 1-dehydrogenase, chloroplastic-like [Phalaenopsis equestris]	4	1	XP_020577283.1	AT5G13110	plastid	16345.1	4192.17	20709.5	4336.87	0.789255	0.391709
Fructose-bisphosphate aldolase, chloroplastic OS=Spinacia oleracea PE=1 SV=3	4	1	P16096	AT4G38970	plastid	20825.6	9644.43	18373.9	0	1.13343	N/A
ATP-citrate synthase alpha chain protein 2 OS=Oryza sativa subsp. japonica GN=ACLA-2 PE=2 SV=2	4	1	Q2QZ86	AT1G09430	cytosol	69438	73447.4	29512.9	17471.7	2.3528	0.212968
pyruvate dehydrogenase E1 component subunit beta [Phalaenopsis equestris]	4	1	XP_020598128.1	AT2G34590	plastid	13878.6	6482.67	16761.9	6350.66	0.827982	0.473438
Germin-like protein subfamily 2 member 2 OS=Arabidopsis thaliana GN=At1g02335 PE=2 SV=1	4	1	Q9FZ27	AT1G02335	extracellular	24960.7	20488.6	31644.1	33675.3	0.788795	0.82064
protein ENHANCED DISEASE RESISTANCE 2-like [Dendrobium catenatum]	4	1	XP_020675974.1	AT2G28320	cytosol	117996	47512.7	211657	38759.3	0.557488	N/A
DNA-binding protein DDB_G0278111 [Dendrobium catenatum]	4	1	XP_020701848.1	AT1G29850	nucleus	33567.2	12094.3	26878.3	11083	1.24886	0.501259
putative 4-hydroxy-4-methyl-2-oxoglutarate aldolase 1 [Phalaenopsis equestris]	4	1	XP_020588206.1	AT3G02770	cytosol	23162.4	14925.6	17998.5	5046.94	1.28691	0.432639
20 kDa chaperonin, chloroplastic [Phalaenopsis equestris]	4	1	XP_020582405.1	AT5G20720	plastid	39283.5	23849	57668.4	24260.3	0.681195	0.148615
Chaperone protein ClpB3, chloroplastic OS=Arabidopsis thaliana GN=CLPB3 PE=1 SV=1	4	1	Q9LF37	AT5G15450	plastid	34864.6	13475.7	22943	12074	1.51961	0.251843
ferritin-4, chloroplastic-like [Phalaenopsis equestris]	4	1	XP_020581860.1	AT2G40300	plastid	2081.81	36.4232	47400.3	19868.8	0.0439198	0.0203509
2-C-methyl-D-erythritol 2,4-cyclodiphosphate synthase, chloroplastic [Dendrobium catenatum]	4	1	XP_020703632.2	AT1G63970	plastid	13204	10390.3	17710.1	10248.6	0.74556	0.506145
Long chain acyl-CoA synthetase 8 OS=Arabidopsis thaliana GN=LACS8 PE=2 SV=1	4	1	Q9SJD4	AT2G04350	endoplasmic reticulum	23660.4	5119.69	22361.1	7443.83	1.05811	0.864978
long chain acyl-CoA synthetase 9, chloroplastic-like [Phalaenopsis equestris]	4	1	XP_020573586.1	AT1G77590	plastid	23935.9	0	0	NA	N/A	N/A
S-formylglutathione hydrolase [Phalaenopsis equestris]	4	1	XP_020572372.1	AT2G41530	cytosol	33170.2	21911.1	21477.9	4001.36	1.54439	0.383847
protein FLX-like 1 [Phalaenopsis equestris]	4	1	XP_020592006.1	AT3G14750	nucleus	24790.2	4738.26	18056.1	13732.4	1.37296	0.591673
putative phosphatidylglycerol/phosphatidylinositol transfer protein DDB_G0282179 [Phalaenopsis equestris]	4	1	XP_020574378.1	AT5G06480	extracellular	32547.3	20029.9	52487.5	42833.6	0.620095	0.666327
protein RETICULATA-RELATED 4, chloroplastic [Dendrobium catenatum]	4	1	XP_020680304.1	AT5G12470	plastid	41141.5	18620	36266	24430.5	1.13444	0.78334
uncharacterized protein LOC110113001 isoform X1 [Dendrobium catenatum]	4	1	XP_020701065.1	AT1G42960	plastid	38520.9	41775	44498.3	48448.5	0.865671	0.842802
LOW QUALITY PROTEIN: uncharacterized protein LOC110026724 [Phalaenopsis equestris]	4	1	XP_020583462.1	AT3G05500	golgi	34446.9	7273.22	31784.9	10161.7	1.08375	0.851053
transmembrane 9 superfamily member 7 [Dendrobium catenatum]	4	1	XP_020697321.1	AT3G13772	golgi	0	NA	51930	0	N/A	N/A
LOW QUALITY PROTEIN: probable cinnamyl alcohol dehydrogenase 6 [Phalaenopsis equestris]	4	1	XP_020598784.1	AT4G39330	cytosol	69977.6	21706.8	115758	64248	0.604514	0.312801
ATP synthase subunit beta, chloroplastic OS=Schnarfia messeniaca GN=atpB PE=3 SV=1	4	1	Q85V31	ATCG00480	plastid	49351.8	37137.3	10573.8	5354.73	4.66735	0.112359
Photosystem II CP43 chlorophyll apoprotein OS=Vitis vinifera GN=psbC PE=3 SV=1	4	1	Q0ZJ24	ATCG00280	plastid	10940.5	5859.37	55259.2	41999.5	0.197986	0.24512
ATP-dependent Clp protease proteolytic subunit-related protein 1, chloroplastic [Dendrobium catenatum]	4	1	XP_020694943.1	AT1G49970	plastid	18337	7059.21	22682.8	12404.4	0.808407	0.558971
gamma conglutin 1-like [Dendrobium catenatum]	4	1	XP_020673332.1	AT1G03220	extracellular	41612.2	2877.43	50143.3	83803	0.829865	0.899268
ubiquitin carboxyl-terminal hydrolase 2 [Phalaenopsis equestris]	4	1	XP_020574713.1	AT1G65650	cytosol	21765.9	6495.09	15234.6	6199.07	1.42871	0.0818882
Probable 26S proteasome non-ATPase regulatory subunit 3 OS=Daucus carota GN=21D7 PE=1 SV=2	4	1	Q06364	AT1G20200	nucleus,cytosol	36391.1	16247	56708.6	34835	0.641721	0.170423
Proteasome subunit alpha type-2-A OS=Arabidopsis thaliana GN=PAB1 PE=1 SV=1	4	1	O23708	AT1G16470	nucleus,cytosol	78306.1	35822.5	123124	92899.6	0.635993	0.423785
elongation factor Ts, mitochondrial [Phalaenopsis equestris]	4	1	XP_020579920.1	AT4G11120	mitochondrion	13309.5	5165.93	14976.3	6329.36	0.888701	0.596789
40S ribosomal protein S5-2 OS=Arabidopsis thaliana GN=RPS5B PE=1 SV=2	4	1	P51427	AT3G11940	cytosol	0	NA	35396	9717.87	N/A	N/A
glutathione S-transferase U19-like [Phalaenopsis equestris]	4	1	XP_020595124.1	AT1G78380	cytosol	77965.6	0	41435.8	28435.9	1.8816	N/A
Guanine nucleotide-binding protein subunit beta-like protein A OS=Oryza sativa subsp. japonica GN=RACK1A PE=1 SV=1	4	1	P49027	AT3G18130	cytosol	12976.4	4752.07	22238.5	0	N/A	N/A
flowering locus K homology domain-like [Dendrobium catenatum]	4	1	XP_020697619.1	AT3G04610	nucleus	1959.54	60.3203	19183.5	5571.15	0.102147	0.00255418
mediator of RNA polymerase II transcription subunit 36a-like [Dendrobium catenatum]	4	1	XP_028554985.1	AT5G52470	nucleus	11031.8	5961.48	21523.6	5209.23	0.512547	0.0644836
DEAD-box ATP-dependent RNA helicase 8-like [Phalaenopsis equestris]	4	1	XP_020584087.1	AT4G00660	nucleus	20727.4	7659.96	93066.8	56955.2	0.222715	0.0856492
LOW QUALITY PROTEIN: aquaporin PIP2-7 [Dendrobium catenatum]	4	1	XP_028548028.1	AT4G35100	plasma membrane	40349.1	35380.2	124966	96108.8	0.322881	0.274125
nucleoid-associated protein At2g24020, chloroplastic-like [Phalaenopsis equestris]	4	1	XP_020572685.1	AT2G24020	plastid	23384.7	13613.7	28611.3	5859.24	0.817323	0.478363
Ras-related protein Rab-2-B OS=Zea mays GN=RAB2B PE=2 SV=1	4	1	P49104	AT4G17170	vacuole	34493.9	0	13848.1	7247.84	2.49087	N/A
ornithine aminotransferase, mitochondrial [Phalaenopsis equestris]	3	1	XP_020598662.1	AT5G46180	mitochondrion	24060.6	6775.7	15319.5	1247.51	1.57058	0.121206
1,2-dihydroxy-3-keto-5-methylthiopentene dioxygenase 3 OS=Arabidopsis thaliana GN=ARD3 PE=2 SV=1	3	1	Q8W108	AT4G14710	cytosol	35091.3	4316.41	44128.1	10654.3	0.795215	0.399745
3-phosphoshikimate 1-carboxyvinyltransferase, chloroplastic OS=Brassica napus PE=3 SV=1	3	1	P17688	AT2G45300	plastid	14201.9	85.6935	17849.1	6979.54	0.795667	0.578809
diaminopimelate epimerase, chloroplastic [Phalaenopsis equestris]	3	1	XP_020579655.1	AT3G53580	plastid	16463.6	7445.36	17918.5	5640.5	0.918807	0.71013
LOW QUALITY PROTEIN: branched-chain-amino-acid aminotransferase 5, chloroplastic-like [Phalaenopsis equestris]	3	1	XP_020572229.1	AT3G49680	plastid	23330.2	3787.31	23737.4	10701.1	0.982848	0.964114
glucose-6-phosphate/phosphate translocator 2, chloroplastic-like [Phalaenopsis equestris]	3	1	XP_020591311.1	AT1G61800	plastid	13047.6	4226.28	16416.3	6018.19	0.794792	0.457743
cytosolic enolase 3 [Phalaenopsis equestris]	3	1	XP_020576555.1	AT2G29560	cytosol	34678.8	0	0	NA	N/A	N/A
cell division protein FtsZ homolog 1, chloroplastic [Phalaenopsis equestris]	3	1	XP_020579990.1	AT5G55280	plastid	45938	25298.4	31251.2	12982.6	1.46996	0.343903
monocopper oxidase-like protein SKU5 [Phalaenopsis equestris]	3	1	XP_020573223.1	AT4G12420	plasma membrane	16297.4	0	9032.33	5103.94	N/A	N/A
villin-2-like isoform X1 [Dendrobium catenatum]	3	1	XP_028550511.1	AT2G41740	cytosol	4355.78	0	15048	7597.42	0.289458	0.000527496
uncharacterized protein LOC110115703 [Dendrobium catenatum]	3	1	XP_020704677.1	AT1G43760	mitochondrion	22764.1	9085.62	14573.9	7075.69	1.56198	0.17225
AP-2 complex subunit alpha-1-like [Phalaenopsis equestris]	3	1	XP_020581608.1	AT5G22780	plasma membrane	32816.7	26754.3	99293	83328.1	0.330504	0.134213
NAD(P)H dehydrogenase (quinone) FQR1-like [Phalaenopsis equestris]	3	1	XP_020574269.1	AT4G36750	plasma membrane	15777.3	4477.43	21250.7	9143.21	0.742434	0.260079
Bifunctional dihydroflavonol 4-reductase/flavanone 4-reductase OS=Malus domestica GN=DFR PE=1 SV=1	3	1	Q9XES5	AT5G42800	golgi,cytosol	21005.6	0	65107.6	22204.6	0.322628	1.58211e-05
protein BOBBER 1 [Dendrobium catenatum]	3	1	XP_020678666.1	AT5G53400	cytosol	5386.84	2375.41	17558.9	6262.59	0.306786	0.00646647
Magnesium-chelatase subunit ChlI, chloroplastic OS=Glycine max GN=CHLI PE=2 SV=1	3	1	P93162	AT4G18480	plastid	37535.2	3011.24	35784.8	10980.7	1.04891	0.875541
uncharacterized protein LOC110025777 isoform X1 [Phalaenopsis equestris]	3	1	XP_020582087.1	AT2G30200	plastid	23726.8	7648.81	17829.6	6131.05	1.33076	0.262491
acyl-coenzyme A oxidase 4, peroxisomal-like [Phalaenopsis equestris]	3	1	XP_020585870.1	AT3G51840	peroxisome	16443.5	3743.42	12107.6	6161.49	1.35811	0.539468
Peroxisomal fatty acid beta-oxidation multifunctional protein OS=Oryza sativa subsp. japonica GN=MFP PE=1 SV=2	3	1	Q8W1L6	AT4G29010	peroxisome	0	NA	60539.7	19328.6	N/A	N/A
acetyl-CoA acetyltransferase, cytosolic 1-like [Phalaenopsis equestris]	3	1	XP_020572466.1	AT5G48230	peroxisome	25420.7	0	21819.1	2488.49	1.16506	N/A
proline synthase co-transcribed bacterial homolog protein-like isoform X1 [Phalaenopsis equestris]	3	1	XP_020591954.1	AT1G11930	cytosol	15355.2	8304.37	30687.7	5058.97	0.500371	0.167842
protein FLX-like 2 [Phalaenopsis equestris]	3	1	XP_020577971.1	AT1G67170	nucleus	207246	46273.2	139879	109661	1.48161	0.264885
probable inactive purple acid phosphatase 1 [Dendrobium catenatum]	3	1	XP_020686270.1	AT1G13750	extracellular	15867	6260.49	18153.7	7531.89	0.87404	0.612996
peptide methionine sulfoxide reductase B5-like [Phalaenopsis equestris]	3	1	XP_020595514.1	AT4G04830	cytosol	78967.5	22506.7	75278.5	25776.1	1.049	0.767451
uncharacterized protein LOC110017970 isoform X1 [Phalaenopsis equestris]	3	1	XP_020570819.1	AT5G56850	nucleus	355816	191063	351517	196234	1.01223	0.976281
UBX domain-containing protein 6 [Phalaenopsis equestris]	3	1	XP_020575013.1	AT1G04850	nucleus	0	NA	28929	7539.1	N/A	N/A
Oxygen-evolving enhancer protein 2, chloroplastic OS=Solanum tuberosum GN=PSBP PE=2 SV=1	3	1	P93566	AT1G06680	plastid	19391.5	16371.7	31795.9	12464.6	0.609875	0.402189
Chlorophyll a-b binding protein 8, chloroplastic OS=Solanum lycopersicum GN=CAB8 PE=3 SV=1	3	1	P27522	AT1G61520	plastid	0	NA	59766.4	0	N/A	N/A
Serine carboxypeptidase II-1 (Fragment) OS=Hordeum vulgare GN=CXP;2-1 PE=1 SV=1	3	1	P55747	AT3G07990	extracellular	345191	273010	21004.3	8741.12	16.4343	0.125267
cathepsin B-like protease 2 [Dendrobium catenatum]	3	1	XP_020672178.1	AT1G02305	extracellular	26135	4243.25	43908.4	25037	0.595218	0.437359
26S proteasome non-ATPase regulatory subunit 4 homolog [Dendrobium catenatum]	3	1	XP_020681495.1	AT4G38630	cytosol	34432.9	8471.45	24902.4	9889.12	1.38271	0.0868071
NPL4-like protein 2 [Phalaenopsis equestris]	3	1	XP_020581782.1	AT2G47970	cytosol	22981.2	4449.63	21823.7	6309.08	1.05304	0.817206
Calnexin homolog OS=Helianthus tuberosus PE=2 SV=1	3	1	Q39994	AT5G61790	endoplasmic reticulum	56599.6	33541.3	66786.2	24191.6	0.847476	0.593872
eukaryotic translation initiation factor 2 subunit beta-like [Phalaenopsis equestris]	3	1	XP_020591619.1	AT5G20920	cytosol	15904.6	2563.17	26343	12275.1	0.603748	0.386357
eukaryotic translation initiation factor 3 subunit F [Phalaenopsis equestris]	3	1	XP_020586383.1	AT2G39990	nucleus,cytosol	20708.7	0	23076.5	10686.6	0.897391	N/A
40S ribosomal protein S27-2-like [Dendrobium catenatum]	3	1	XP_020675600.1	AT3G61110	cytosol	9941.5	5472.74	32238.8	17807.2	0.30837	0.0937194
60S ribosomal protein L26-1 OS=Arabidopsis thaliana GN=RPL26A PE=2 SV=2	3	1	P51414	AT3G49910	cytosol	19507.9	1649.8	15759.8	5316.56	1.23782	0.471057
40S ribosomal protein S12-like [Phalaenopsis equestris]	3	1	XP_020593505.1	AT2G32060	cytosol	22497.4	11717.3	18783.8	11026.7	1.1977	0.661171
monothiol glutaredoxin-S11 [Phalaenopsis equestris]	3	1	XP_020581593.1	AT4G04950	cytosol	53196.6	61615.6	108360	110967	0.490925	0.260211
2-Cys peroxiredoxin BAS1, chloroplastic-like [Phalaenopsis equestris]	3	1	XP_020573413.1	AT3G11630	plastid	14309.4	2271.39	34699.6	24008	0.41238	0.383227
Peroxidase 59 OS=Arabidopsis thaliana GN=PER59 PE=1 SV=2	3	1	Q39034	AT5G19890	extracellular	39194.6	11785.5	42895.6	21360	0.913721	0.724452
peroxidase 51-like [Phalaenopsis equestris]	3	1	XP_020580264.1	AT4G37530	extracellular	71991.1	38454.5	61771.9	41441.8	1.16543	0.823526
protein SRC2 [Dendrobium catenatum]	3	1	XP_020702658.1	AT1G07310	nucleus	13608.4	5682.29	23423.3	6438.07	0.580977	0.107986
Glycine-rich RNA-binding, abscisic acid-inducible protein OS=Zea mays GN=RAB15 PE=1 SV=1	3	1	P10979	AT2G21660	nucleus	25434.4	27816.3	82403.6	25869.3	0.308657	0.00294176	-0.764827	2.15085
28 kDa ribonucleoprotein, chloroplastic-like [Phalaenopsis equestris]	3	1	XP_020584041.1	AT5G50250	plastid	20055.3	7302.65	6324.71	1043.36	3.17094	0.203758
glycine-rich RNA-binding protein 3, mitochondrial [Dendrobium catenatum]	3	1	XP_028555262.1	AT5G61030	mitochondrion	88147.6	66759.3	122047	75191.4	0.722245	0.468317
oligouridylate-binding protein 1-like isoform X1 [Phalaenopsis equestris]	3	1	XP_020588497.1	AT3G14100	nucleus	15116.5	9095.1	19876.1	15897.2	0.760535	0.616978
RNA-binding protein 2-like isoform X1 [Phalaenopsis equestris]	3	1	XP_020599633.1	AT1G76940	nucleus	20416	6901.97	16052.7	10046.4	1.27181	0.675297
single-stranded DNA-binding protein WHY1, chloroplastic-like [Phalaenopsis equestris]	3	1	XP_020572571.1	AT1G14410	plastid	21224.8	12525.4	17617.6	11664.2	1.20475	0.756093
protein mago nashi homolog 2 [Dendrobium catenatum]	3	1	XP_020693810.1	AT1G02140	nucleus	20097.1	2891.73	19625.6	10479.3	1.02402	0.946108
nudix hydrolase 19, chloroplastic [Phalaenopsis equestris]	3	1	XP_020592671.1	AT5G20070	plastid	48666	0	9016	3352.5	5.39774	N/A
importin beta-like SAD2 [Dendrobium catenatum]	3	1	XP_020693789.1	AT2G31660	nucleus,cytosol	0	NA	26201.7	10816.1	0.01	2.32367e-16
oxysterol-binding protein-related protein 3A-like [Phalaenopsis equestris]	3	1	XP_020599266.1	AT5G02100	endoplasmic reticulum	16249.4	3828.38	13362.7	2880.77	1.21603	0.223168
V-type proton ATPase subunit C [Phalaenopsis equestris]	3	1	XP_020599282.1	AT1G12840	vacuole,golgi	20263.1	2346.76	22674.7	6248.33	0.893642	0.68885
mitochondrial dicarboxylate/tricarboxylate transporter DTC [Dendrobium catenatum]	3	1	XP_020676376.1	AT5G19760	mitochondrion	17331.8	8979.04	16041.8	11097.5	1.08042	0.912866
Serine hydroxymethyltransferase, mitochondrial OS=Solanum tuberosum PE=2 SV=1	2	1	P50433	AT4G37930	mitochondrion	0	NA	57218.9	16234.1	0.01	2.32367e-16
Ketol-acid reductoisomerase, chloroplastic OS=Arabidopsis thaliana GN=At3g58610 PE=2 SV=2	2	1	Q05758	AT3G58610	plastid	7559.4	170.443	19559.1	6433.15	0.38649	0.203239
3-phosphoshikimate 1-carboxyvinyltransferase 2 [Phalaenopsis equestris]	2	1	XP_020576307.1	AT2G45300	plastid	16285.3	582.195	19934.4	4916.37	0.816947	0.477578
beta-ureidopropionase [Dendrobium catenatum]	2	1	XP_020697881.2	AT5G64370	cytosol	36203.5	0	26924.5	6950.23	1.34463	N/A
Phosphomannomutase OS=Oryza sativa subsp. indica GN=PMM PE=3 SV=1	2	1	Q259G4	AT2G45790	mitochondrion,cytosol	0	NA	50444.1	52233.2	0.01	2.32367e-16
enolase [Dendrobium catenatum]	2	1	XP_028554329.1	AT2G29560	cytosol	0	NA	10340.9	7844.23	0.01	2.32367e-16
uncharacterized protein LOC110024445 [Phalaenopsis equestris]	2	1	XP_020580072.1	AT5G17500	extracellular	9889.11	3558.95	25382.4	5077	0.389605	0.0624355
1,4-alpha-glucan-branching enzyme 1, chloroplastic/amyloplastic [Dendrobium catenatum]	2	1	XP_028549944.1	AT5G03650	plastid	7927	5954.18	21052.3	7054.74	0.376539	0.191905
pyruvate kinase, cytosolic isozyme-like [Dendrobium catenatum]	2	1	XP_020701778.2	AT5G56350	cytosol	9591.32	885.105	13738.8	5766.6	0.698118	0.400998
NADP-dependent glyceraldehyde-3-phosphate dehydrogenase OS=Arabidopsis thaliana GN=ALDH11A3 PE=1 SV=2	2	1	Q1WIQ6	AT2G24270	cytosol	0	NA	84378.3	0	N/A	N/A
starch synthase 1, chloroplastic/amyloplastic-like [Dendrobium catenatum]	2	1	XP_028555719.1	AT5G24300	plastid	15170.5	0	22928.6	5372.39	N/A	N/A
malate dehydrogenase [NADP], chloroplastic [Phalaenopsis equestris]	2	1	XP_020574666.1	AT5G58330	plastid	201390	244937	0	NA	100	2.32367e-16
NAD-dependent malic enzyme 59 kDa isoform, mitochondrial isoform X1 [Dendrobium catenatum]	2	1	XP_020689112.1	AT4G00570	mitochondrion	11421.8	8209.84	14209.9	5282.69	0.803788	0.575061
probable xyloglucan endotransglucosylase/hydrolase protein 23 [Dendrobium catenatum]	2	1	XP_020699176.1	AT4G25810	extracellular	47651.5	27460	20587.2	9886.41	2.31462	0.184585
probable xyloglucan endotransglucosylase/hydrolase protein 27 [Dendrobium catenatum]	2	1	XP_020687988.1	AT2G06850	extracellular	41467.9	0	28795.2	18794.2	1.44009	N/A
LOW QUALITY PROTEIN: dihydrolipoyllysine-residue acetyltransferase component 5 of pyruvate dehydrogenase complex, chloroplastic [Phalaenopsis equestris]	2	1	XP_020571028.1	AT1G34430	plastid	26742.4	10438.5	20407.5	10094.8	1.31042	0.635755
Malate dehydrogenase, glyoxysomal OS=Arabidopsis thaliana GN=At5g09660 PE=1 SV=1	2	1	Q9ZP05	AT5G09660	peroxisome	103301	55563.5	89213.3	24138	1.15791	0.637022
myosin-11 [Dendrobium catenatum]	2	1	XP_020705066.1	AT2G32240	endoplasmic reticulum	21312	0	19144.2	8120.9	1.11324	N/A
Leucine-rich repeat extensin-like protein 3 OS=Arabidopsis thaliana GN=LRX3 PE=1 SV=1	2	1	Q9T0K5	AT4G13340	extracellular	11173	0	19733.1	7688.64	0.566206	0.000468942
poly [ADP-ribose] polymerase 1 [Dendrobium catenatum]	2	1	XP_020671975.1	AT2G31320	nucleus	37757.7	26797.2	110062	76905.9	0.34306	0.114871
DNA gyrase subunit B, mitochondrial OS=Arabidopsis thaliana GN=GYRBM PE=2 SV=1	2	1	Q94BZ7	AT5G04130	mitochondrion	9505.11	3399.95	11706.8	4946.99	0.81193	0.646293
DNA-binding protein DDB_G0278111 isoform X2 [Phalaenopsis equestris]	2	1	XP_020596833.1	AT1G29850	nucleus	17122.9	5375.22	17162.6	4412.93	0.997688	0.994099
ESCRT-related protein CHMP1-like [Phalaenopsis equestris]	2	1	XP_020586829.1	AT1G17730	nucleus	16866.8	5865.53	32421.8	2074.6	0.520229	0.129598
flavonoid 3'-monooxygenase-like [Phalaenopsis equestris]	2	1	XP_020572969.1	AT5G07990	endoplasmic reticulum	4053.12	3270.45	10622.7	4025.72	0.381553	0.020615
glycerate dehydrogenase [Dendrobium catenatum]	2	1	XP_020700853.1	AT1G68010	peroxisome	29460.2	11341.9	17586	5533.36	1.67521	0.446065
Putative heat shock protein HSP90 (Fragments) OS=Populus euphratica PE=1 SV=1	2	1	P84577	AT2G04030	plastid	0	NA	23314.2	0	N/A	N/A
dnaJ protein ERDJ3B [Phalaenopsis equestris]	2	1	XP_020574849.1	AT3G62600	endoplasmic reticulum	32518.8	8017.79	39940.6	20492.4	0.814178	0.658264
late embryogenesis abundant protein 1 [Dendrobium catenatum]	2	1	XP_028547536.1	AT1G52690	nucleus	14247.1	9615.93	18978.6	10921.2	0.750691	0.536728
Acetyl-CoA carboxylase 2 OS=Arabidopsis thaliana GN=ACC2 PE=2 SV=1	2	1	F4I1L3	AT1G36180	plastid	190815	0	0	NA	N/A	N/A
LOW QUALITY PROTEIN: inosine-5'-monophosphate dehydrogenase-like [Phalaenopsis equestris]	2	1	XP_020600047.1	AT1G16350	peroxisome	18842.7	15075.9	22436.5	13226.7	0.839822	0.780658
universal stress protein PHOS34-like [Phalaenopsis equestris]	2	1	XP_020590146.1	AT3G53990	plasma membrane,cytosol	13617.1	3965.8	15241	0	N/A	N/A
translin [Phalaenopsis equestris]	2	1	XP_020582514.1	AT2G37020	plastid	0	NA	26544	17551.2	0.01	2.32367e-16
fasciclin-like arabinogalactan protein 17 [Phalaenopsis equestris]	2	1	XP_020579771.1	AT5G06390	plasma membrane	0	NA	23978.2	5946.36	0.01	2.32367e-16
pollen-specific protein C13 [Dendrobium catenatum]	2	1	XP_020675548.1	AT4G08685	extracellular	9606.29	0	22532.5	3994.38	0.42633	1.59222e-05
protein CutA 1, chloroplastic [Phalaenopsis equestris]	2	1	XP_020586721.1	AT2G33740	plastid	6333.21	3353.11	14076.2	8328.19	0.449923	0.0826389
Tropinone reductase 1 OS=Datura stramonium GN=TR1 PE=1 SV=1	2	1	P50162	AT5G06060	cytosol	16777.4	7093.88	6852.45	5167.42	2.44838	0.134913
pentatricopeptide repeat-containing protein At3g49240-like isoform X1 [Phalaenopsis equestris]	2	1	XP_020582059.1	AT3G49240	mitochondrion	12073.2	1441.17	17932.6	5344.61	0.673252	0.281576
uncharacterized protein LOC110103452 [Dendrobium catenatum]	2	1	XP_028555979.1	AT5G09360	extracellular	23086.9	754.311	16996.4	7761.15	1.35834	0.454475
uncharacterized protein LOC110022480 isoform X1 [Phalaenopsis equestris]	2	1	XP_020577098.1	AT3G19740	mitochondrion	10988.6	4111.08	52310.6	50747.3	0.210065	0.502249
H/ACA ribonucleoprotein complex subunit GAR1 [Dendrobium catenatum]	2	1	XP_020685960.1	AT1G76010	nucleus	33305.3	14504.7	42025.9	17077.5	0.792495	0.639798
uncharacterized protein LOC110031286 isoform X1 [Phalaenopsis equestris]	2	1	XP_020590068.1	AT1G42480	extracellular	14747.4	830.413	15843.7	2423.92	0.930804	0.710407
Methylenetetrahydrofolate reductase 1 OS=Arabidopsis thaliana GN=MTHFR1 PE=1 SV=1	2	1	Q9SE60	AT3G59970	cytosol	19249.6	6544.97	25606.1	18091.1	0.751758	0.714324
uncharacterized protein LOC110112431 [Dendrobium catenatum]	2	1	XP_020700308.1	AT4G02340	peroxisome	22045.8	0	29057.1	0	0.758705	N/A
LOW QUALITY PROTEIN: transmembrane 9 superfamily member 11-like [Dendrobium catenatum]	2	1	XP_020688178.2	AT5G35160	golgi	13360.8	0	18592.8	0	N/A	N/A
uncharacterized protein LOC110114011 [Dendrobium catenatum]	2	1	XP_020702419.2	AT1G29980	plasma membrane	4477.32	0	11226.1	10588.8	0.398832	N/A
phenylalanine ammonia-lyase [Dendrobium catenatum]	2	1	XP_020702280.1	AT2G37040	cytosol	17828.3	0	25044.2	17394.9	N/A	N/A
delta(24)-sterol reductase [Dendrobium catenatum]	2	1	XP_020679532.1	AT3G19820	endoplasmic reticulum	9608.69	4156.7	19470.1	15740.7	0.493509	0.516279
metacaspase-4 [Dendrobium catenatum]	2	1	XP_020677598.1	AT1G79340	cytosol	0	NA	18585.1	8189.62	0.01	2.32367e-16
subtilisin-like protease SBT1.4 [Phalaenopsis equestris]	2	1	XP_020571348.1	AT3G14067	extracellular	18498	6837.57	5834.31	1259.66	3.17056	0.0792153
signal peptidase complex catalytic subunit SEC11A-like [Phalaenopsis equestris]	2	1	XP_020576280.1	AT1G52600	endoplasmic reticulum	22741.9	18028.4	6177.82	2823.28	3.68123	0.324312
26S protease regulatory subunit 7 homolog A OS=Arabidopsis thaliana GN=RPT1A PE=2 SV=1	2	1	Q9SSB5	AT1G53750	nucleus,cytosol	35479	4676.2	53161.3	13610.2	0.667383	0.264129
26S proteasome regulatory subunit RPN13 [Phalaenopsis equestris]	2	1	XP_020584204.1	AT2G26590	cytosol	123481	36768.3	91507.5	52947	1.3494	0.565323
proteasome subunit alpha type-4 [Phalaenopsis equestris]	2	1	XP_020590452.1	AT3G22110	nucleus,cytosol	16697.3	4370.81	15698.6	6293.55	1.06361	0.800938
uncharacterized protein LOC110025371 isoform X1 [Phalaenopsis equestris]	2	1	XP_020581477.1	AT1G77710	nucleus	30276.5	9840.2	33273.3	13790.6	0.909934	0.875886
probable glucan 1,3-alpha-glucosidase [Phalaenopsis equestris]	2	1	XP_020580155.1	AT5G63840	endoplasmic reticulum	29145.2	0	23896.7	4136.02	1.21963	N/A
asparagine--tRNA ligase, cytoplasmic 3 [Dendrobium catenatum]	2	1	XP_020700330.1	AT5G56680	cytosol	30686.3	0	55031.2	0	0.557616	N/A
60S ribosomal protein L17-1 OS=Arabidopsis thaliana GN=RPL17A PE=1 SV=1	2	1	Q93VI3	AT1G27400	plastid,nucleus,cytosol	1991.23	0	23615.5	17466.7	0.0843187	0.00289721
60S ribosomal protein L14-2 OS=Arabidopsis thaliana GN=RPL14B PE=2 SV=1	2	1	Q9T043	AT4G27090	cytosol	0	NA	34664.5	0	N/A	N/A
60S ribosomal protein L22-3 [Dendrobium catenatum]	2	1	XP_020689140.1	AT3G05560	cytosol	10924.3	0	24945.2	20872.8	N/A	N/A
glutathione S-transferase U17-like [Phalaenopsis equestris]	2	1	XP_020577865.1	AT1G10360	cytosol	12548.4	13927.1	28045.3	29309.8	0.447433	0.419149
thioredoxin Y, chloroplastic [Dendrobium catenatum]	2	1	XP_020694967.1	AT1G76760	plastid	34395.9	4633.57	27426.6	11924.2	1.25411	0.550689
cationic peroxidase 1 [Dendrobium catenatum]	2	1	XP_020683356.1	AT5G05340	extracellular	25814.3	21170.5	17346.3	0	1.48818	N/A
peroxidase 40 [Dendrobium catenatum]	2	1	XP_020703200.2	AT4G16270	plasma membrane	11878.3	11089.2	36345	0	N/A	N/A
sulfite reductase [ferredoxin], chloroplastic isoform X1 [Dendrobium catenatum]	2	1	XP_020698352.1	AT5G04590	plastid	9494.98	0	20712.3	10338.5	N/A	N/A
serine/arginine-rich SC35-like splicing factor SCL28 isoform X1 [Phalaenopsis equestris]	2	1	XP_020586832.1	AT5G18810	nucleus	24720.6	11694.4	6202.59	1065.68	3.98553	0.142104
serine/arginine-rich splicing factor SR45a [Dendrobium catenatum]	2	1	XP_020677747.1	AT1G07350	nucleus	10320.5	1251.86	18600.6	7058.19	0.554847	0.293076
DNA-directed RNA polymerases II, IV and V subunit 3-like [Phalaenopsis equestris]	2	1	XP_020593275.1	AT2G15430	nucleus	60710.8	51902.5	48205.1	38019.3	1.25943	0.777995
sm-like protein LSM2 [Phalaenopsis equestris]	2	1	XP_020580342.1	AT1G03330	nucleus	14304.3	5073.89	13095.1	7083.36	1.09233	0.782144
transcription initiation factor TFIID subunit 15b, partial [Phalaenopsis equestris]	2	1	XP_020585920.1	AT5G58470	nucleus	289903	0	0	NA	N/A	N/A
ABC transporter F family member 3 isoform X1 [Phalaenopsis equestris]	2	1	XP_020582440.1	AT1G64550	cytosol	14523.8	4116.66	11244.4	5662	1.29165	0.259284
ABC transporter G family member 39 [Dendrobium catenatum]	2	1	XP_020676236.1	AT1G15520	plasma membrane	14392.3	5737.95	8830.96	3504.02	1.62975	0.297102
dicarboxylate transporter 2.1, chloroplastic [Dendrobium catenatum]	2	1	XP_020672586.1	AT5G64290	plastid	15578.6	4863.24	24549.1	8796.41	0.634588	0.383546
protein transport protein SEC13 homolog B-like [Phalaenopsis equestris]	2	1	XP_020578337.1	AT2G30050	nucleus,cytosol	14245.4	6276.56	16738.1	4199.46	0.851079	0.527709
ras-related protein RABA5e-like [Phalaenopsis equestris]	2	1	XP_020592511.1	AT1G05810	plastid	21296.1	8622.91	17817.9	8218.83	1.19521	0.551775
beta-adaptin-like protein C [Phalaenopsis equestris]	2	1	XP_020573220.1	AT4G23460	plasma membrane	17157.9	4372.95	22443	8596.14	0.764509	0.578017
probable voltage-gated potassium channel subunit beta [Phalaenopsis equestris]	2	1	XP_020593163.1	AT1G04690	plasma membrane	11279.6	7603.04	13743.4	2714.59	0.820729	0.634109
ABC transporter F family member 1 [Dendrobium catenatum]	2	1	XP_020677888.1	AT5G60790	cytosol	23819.2	12337.4	21590.8	5445.16	1.10321	0.784343
mitochondrial import inner membrane translocase subunit Tim9 [Phalaenopsis equestris]	2	1	XP_020574369.1	AT3G46560	mitochondrion	33090	11951.5	28191.8	25095.7	1.17374	0.876352
protein transport protein SEC31 homolog B [Dendrobium catenatum]	2	1	XP_020696568.1	AT3G63460	golgi	16538.2	12126	17275.6	7514.15	0.957311	0.907526
probable V-type proton ATPase subunit H isoform X1 [Dendrobium catenatum]	2	1	XP_020691000.1	AT3G42050	vacuole,golgi	82723.5	0	0	NA	N/A	N/A
threonine dehydratase biosynthetic, chloroplastic [Phalaenopsis equestris]	1	1	XP_020578960.1	AT3G10050	plastid	0	NA	14632.8	9491.23	0.01	2.32367e-16
probable ribose-5-phosphate isomerase 3, chloroplastic [Phalaenopsis equestris]	1	1	XP_020579882.1	AT3G04790	plastid	9855.94	2380.34	0	NA	100	2.32367e-16
alanine--glyoxylate aminotransferase 2 homolog 1, mitochondrial [Phalaenopsis equestris]	1	1	XP_020575503.1	AT4G39660	mitochondrion	8186.07	1383.18	19996.5	5291.74	0.409374	0.163447
ribose-phosphate pyrophosphokinase 1 [Dendrobium catenatum]	1	1	XP_020702721.1	AT2G44530	plastid	21144.2	6262.15	19743.8	6401.59	1.07093	0.845576
Cysteine synthase OS=Arabidopsis thaliana GN=OASA1 PE=1 SV=2	1	1	P47998	AT4G14880	cytosol	0	NA	28853.9	0	N/A	N/A
succinate-semialdehyde dehydrogenase, mitochondrial [Phalaenopsis equestris]	1	1	XP_020573294.1	AT1G79440	mitochondrion	44798.9	0	24555.6	9828.16	1.82439	N/A
acetylornithine deacetylase isoform X1 [Dendrobium catenatum]	1	1	XP_020693701.1	AT4G17830	cytosol	16617.9	4138.34	2721.55	0	N/A	N/A
uncharacterized protein LOC110111658 [Dendrobium catenatum]	1	1	XP_020699291.1	AT3G26380	extracellular	12000.3	0	13301.8	5935.91	N/A	N/A
Probable mannose-1-phosphate guanylyltransferase 2 OS=Oryza sativa subsp. japonica GN=Os01g0847200 PE=2 SV=1	1	1	Q941T9	AT2G39770	cytosol	0	NA	1.01839e+06	1.43251e+06	N/A	N/A
Pyruvate kinase isozyme A, chloroplastic OS=Ricinus communis PE=1 SV=1	1	1	Q43117	AT3G22960	plastid	44509.2	0	37910.9	0	1.17405	N/A
4-alpha-glucanotransferase DPE1, chloroplastic/amyloplastic [Phalaenopsis equestris]	1	1	XP_020580873.1	AT5G64860	plastid	30974	0	23627.9	7262.08	1.31091	N/A
limonoid UDP-glucosyltransferase-like [Phalaenopsis equestris]	1	1	XP_020591581.1	AT4G15480	plasma membrane,cytosol	0	NA	17341.1	14289.3	N/A	N/A
1,4-alpha-glucan-branching enzyme 2-2, chloroplastic/amyloplastic OS=Arabidopsis thaliana GN=SBE2.2 PE=1 SV=1	1	1	Q9LZS3	AT5G03650	plastid	20840.9	0	14750.9	0	1.41285	N/A
trifunctional UDP-glucose 4,6-dehydratase/UDP-4-keto-6-deoxy-D-glucose 3,5-epimerase/UDP-4-keto-L-rhamnose-reductase RHM1 [Dendrobium catenatum]	1	1	XP_020683487.1	AT1G78570	cytosol	11778.7	5066.97	16825.8	5940.81	0.700036	0.412363
trifunctional UDP-glucose 4,6-dehydratase/UDP-4-keto-6-deoxy-D-glucose 3,5-epimerase/UDP-4-keto-L-rhamnose-reductase RHM1 [Dendrobium catenatum]	1	1	XP_028551970.1	AT1G78570	cytosol	11733	1249.35	15592.5	8285.38	0.752475	0.621098
Probable xyloglucan endotransglucosylase/hydrolase protein 25 OS=Arabidopsis thaliana GN=XTH25 PE=2 SV=2	1	1	Q38907	AT5G57550	extracellular	37031.6	29068.3	41342.5	12108.4	0.895727	0.844907
ATP-citrate synthase alpha chain protein 2 isoform X1 [Phalaenopsis equestris]	1	1	XP_020572506.1	AT1G60810	cytosol	7290.37	2646.42	8093.18	3237.94	0.900805	0.865488
cyclase-associated protein 1 [Dendrobium catenatum]	1	1	XP_020676322.1	AT4G34490	cytosol	8911.03	2281.11	10976.2	2303.99	0.811847	0.444251
cyclase-like protein 3 isoform X1 [Dendrobium catenatum]	1	1	XP_028549249.1	AT4G35220	extracellular	11540	4551.54	12725.6	2776.45	0.906834	0.844667
N-terminal acetyltransferase A complex auxiliary subunit NAA15 isoform X1 [Phalaenopsis equestris]	1	1	XP_020582388.1	AT1G80410	cytosol	19381.7	3750.68	13716.6	3451.12	1.41301	0.207283
Hypersensitive-induced response protein 1 OS=Arabidopsis thaliana GN=HIR1 PE=1 SV=1	1	1	Q9FM19	AT5G62740	plasma membrane	8687.54	4832.72	16962.8	8801.32	0.512151	0.308561
temperature-induced lipocalin-1-like [Phalaenopsis equestris]	1	1	XP_020587963.1	AT5G58070	endoplasmic reticulum	13896.7	5000.6	13265.7	8918.25	1.04757	0.936975
hypersensitive-induced response protein 1 isoform X1 [Dendrobium catenatum]	1	1	XP_028553629.1	AT5G62740	plasma membrane	0	NA	4074.59	1497.36	N/A	N/A
histone deacetylase complex subunit SAP18 [Dendrobium catenatum]	1	1	XP_020685383.1	AT2G45640	nucleus	8637.55	3798.05	15174.6	4428.07	0.56921	0.1433
DNA repair RAD52-like protein 1, mitochondrial [Phalaenopsis equestris]	1	1	XP_020589727.1	AT1G71310	mitochondrion	22380.9	10159.9	12090.4	9409.98	1.85113	0.225922
DNA replication licensing factor MCM5 [Phalaenopsis equestris]	1	1	XP_020586983.1	AT2G07690	nucleus	26694.6	0	95738.2	0	0.278829	N/A
vacuolar protein sorting-associated protein 32 homolog 2-like [Phalaenopsis equestris]	1	1	XP_020588767.1	AT2G19830	golgi	21714.5	18395	37041.4	27013.3	0.586224	0.372638
dynamin-2A-like [Dendrobium catenatum]	1	1	XP_020674790.1	AT1G10290	golgi	11371.4	4537.25	10397	4919.51	1.09372	0.846036
AP-4 complex subunit mu isoform X1 [Dendrobium catenatum]	1	1	XP_020675189.1	AT4G24550	golgi	33326	2016.87	26524.5	0	1.25642	N/A
cytochrome b-c1 complex subunit Rieske-4, mitochondrial-like [Phalaenopsis equestris]	1	1	XP_020593094.1	AT5G13430	mitochondrion	5410.67	0	24541.6	15056.1	N/A	N/A
uncharacterized protein LOC110096129 [Dendrobium catenatum]	1	1	XP_020677561.1	AT3G09350	cytosol	16837.3	3932.47	18729.2	10857.7	0.898989	0.854966
prolycopene isomerase 2, chloroplastic [Phalaenopsis equestris]	1	1	XP_020574316.1	AT1G06820	plastid	18616	3611.74	24278	4114.17	0.766787	0.307886
acetate/butyrate--CoA ligase AAE7, peroxisomal [Dendrobium catenatum]	1	1	XP_020704915.1	AT3G16910	peroxisome	0	NA	13125.8	8813.74	0.01	2.32367e-16
Acetyl-coenzyme A carboxylase carboxyl transferase subunit beta, chloroplastic OS=Solanum bulbocastanum GN=accD PE=3 SV=2	1	1	Q2MIH8	ATCG00500	plastid	7501.95	4330.39	13517.2	9572.25	0.554993	0.359649
stearoyl-[acyl-carrier-protein] 9-desaturase, chloroplastic isoform X1 [Dendrobium catenatum]	1	1	XP_028550080.1	AT2G43710	plastid	9279.34	2512.6	14141.9	6814.05	0.656161	0.444024
peroxisomal fatty acid beta-oxidation multifunctional protein-like isoform X1 [Phalaenopsis equestris]	1	1	XP_020581769.1	AT4G29010	peroxisome	32644.5	21742.2	30243.9	17437.2	1.07937	0.908923
UMP-CMP kinase 3-like isoform X1 [Phalaenopsis equestris]	1	1	XP_020577759.1	AT5G26667	cytosol	10238.6	146.084	20607.2	11075.4	0.496844	0.314029
ER membrane protein complex subunit 8/9 homolog [Phalaenopsis equestris]	1	1	XP_020596891.1	AT5G55940	endoplasmic reticulum	16129	5457.42	26467.2	6500.62	0.609396	0.233579
GPN-loop GTPase QQT2 [Dendrobium catenatum]	1	1	XP_028550934.1	AT4G21800	nucleus	20618.3	1558.79	15209.1	7895.89	1.35566	0.314383
LOW QUALITY PROTEIN: 2-methyl-6-phytyl-1,4-hydroquinone methyltransferase 1, chloroplastic-like [Phalaenopsis equestris]	1	1	XP_020579865.1	AT3G63410	plastid	14141	6922.03	20478.2	6287.7	0.690541	0.410407
protein RETICULATA-RELATED 3, chloroplastic [Dendrobium catenatum]	1	1	XP_020681318.1	AT3G08640	plastid	13151.3	9420.65	16937.2	1228.53	0.776478	0.531553
dnaJ homolog subfamily B member 4-like [Phalaenopsis equestris]	1	1	XP_020596712.1	AT2G20560	cytosol	25076.4	14920.7	21464.9	2719.48	1.16825	0.772066
uncharacterized protein LOC110023213 isoform X1 [Phalaenopsis equestris]	1	1	XP_020578176.1	AT3G08840	plastid	11199	8596.04	12011.6	7252.15	0.932347	0.878531
uncharacterized protein LOC110110219 [Dendrobium catenatum]	1	1	XP_020697257.1	AT5G61910	nucleus	26623.1	133.731	25985.7	7038.31	1.02453	0.91531
pentatricopeptide repeat-containing protein At4g31850, chloroplastic [Phalaenopsis equestris]	1	1	XP_020600063.1	AT4G31850	plastid	28827.7	0	33979.6	26567.9	0.848381	N/A
LOW QUALITY PROTEIN: perakine reductase-like [Phalaenopsis equestris]	1	1	XP_020579745.1	AT1G60710	cytosol	0	NA	23627.7	0	N/A	N/A
uncharacterized protein LOC110111203 [Dendrobium catenatum]	1	1	XP_028548251.1	ATMG00860	mitochondrion	11041.6	0	0	NA	N/A	N/A
Oxygen-evolving enhancer protein 1, chloroplastic (Fragments) OS=Populus euphratica GN=PSBO PE=1 SV=1	1	1	P84989	AT3G50820	plastid	10806.1	8623.86	14304.3	11277.5	0.755446	0.781168
Photosystem I reaction center subunit N, chloroplastic (Fragment) OS=Zea mays GN=PSAN PE=3 SV=1	1	1	O65107	AT5G64040	plastid	3038.22	0	51817.5	0	N/A	N/A
chlorophyll a-b binding protein 8, chloroplastic [Phalaenopsis equestris]	1	1	XP_020578734.1	AT1G61520	plastid	13799	42.2659	20291.2	0	N/A	N/A
photosystem I reaction center subunit N, chloroplastic [Phalaenopsis equestris]	1	1	XP_020588027.1	AT5G64040	plastid	36059.2	26956	0	NA	N/A	N/A
photosystem I reaction center subunit II, chloroplastic [Dendrobium catenatum]	1	1	XP_020678051.2	AT4G02770	plastid	19804.8	0	0	NA	N/A	N/A
IAA-amino acid hydrolase ILR1-like 1 [Dendrobium catenatum]	1	1	XP_020702251.1	AT1G51760	endoplasmic reticulum	14035.3	4263.84	16472.5	4639.48	0.852041	0.67662
proteasome subunit beta type-2-A-like [Dendrobium catenatum]	1	1	XP_020672620.1	AT3G22630	nucleus,cytosol	23312.7	2563.91	15245.4	1707.69	N/A	N/A
proteasome subunit alpha type-4 [Dendrobium catenatum]	1	1	XP_020674864.1	AT3G22110	nucleus,cytosol	155172	0	3730.92	535.246	41.5907	N/A
ras-related protein RABH1e [Dendrobium catenatum]	1	1	XP_020680332.1	AT5G10260	cytosol	17480.5	0	28517.1	0	N/A	N/A
glutamate--tRNA ligase, chloroplastic/mitochondrial isoform X1 [Phalaenopsis equestris]	1	1	XP_020575969.1	AT5G64050	mitochondrion,plastid	11647.7	5245.93	14925.4	5570.44	0.780394	0.710111
eukaryotic translation initiation factor 2 subunit gamma-like [Phalaenopsis equestris]	1	1	XP_020589527.1	AT1G04170	cytosol	143929	0	0	NA	N/A	N/A
40S ribosomal protein S15 [Phalaenopsis equestris]	1	1	XP_020575996.1	AT5G09510	cytosol	58378.4	34269.3	192451	73017.1	0.303341	0.0233228
40S ribosomal protein S16-like [Phalaenopsis equestris]	1	1	XP_020587226.1	AT2G09990	cytosol	133513	87220.7	45094	22102.5	2.96076	0.0849531
40S ribosomal protein S29 OS=Triticum aestivum GN=RPS29 PE=1 SV=1	1	1	Q5I7K3	AT4G33865	nucleus,cytosol	4035.42	899.476	22363.7	14302	0.180445	0.329241
60S ribosomal protein L4-1 OS=Arabidopsis thaliana GN=RPL4A PE=2 SV=1	1	1	Q9SF40	AT3G09630	cytosol	0	NA	30682.4	0	N/A	N/A
monothiol glutaredoxin-S15, mitochondrial [Dendrobium catenatum]	1	1	XP_020685907.1	AT3G15660	mitochondrion	9928.38	1384.4	14737.5	6064.77	0.673682	0.417151
Peroxiredoxin-2F, mitochondrial OS=Oryza sativa subsp. japonica GN=PRXIIF PE=2 SV=1	1	1	Q9SDD6	AT3G06050	mitochondrion	35950.5	23775.6	18363	8672.82	1.95776	0.431666
monothiol glutaredoxin-S10 isoform X1 [Dendrobium catenatum]	1	1	XP_020679340.1	AT4G28730	plastid	10976.1	689.981	13381.8	4312.44	0.820223	0.556945
Peroxiredoxin-2E, chloroplastic OS=Arabidopsis thaliana GN=PRXIIE PE=1 SV=2	1	1	Q949U7	AT3G52960	plastid	0	NA	24958.7	0	N/A	N/A
probable lactoylglutathione lyase, chloroplastic [Dendrobium catenatum]	1	1	XP_020690878.1	AT1G67280	plastid	0	NA	22473.5	0	N/A	N/A
cullin-1 isoform X1 [Phalaenopsis equestris]	1	1	XP_020597617.1	AT4G02570	nucleus	10224	742.571	13420.3	6732.41	0.761828	0.573027
cysteine desulfurase, mitochondrial [Dendrobium catenatum]	1	1	XP_020692996.1	AT5G65720	mitochondrion	11900	0	13086.1	0	N/A	N/A
DNA-directed RNA polymerase subunit beta' OS=Pseudendoclonium akinetum GN=rpoC1 PE=3 SV=1	1	1	Q3ZJ92	ATCG00180	plastid	0	NA	449854	252329	0.01	2.32367e-16
nuclear cap-binding protein subunit 1 [Dendrobium catenatum]	1	1	XP_020683597.1	AT2G13540	cytosol	1.51029e+06	1.69189e+06	386517	392012	3.90743	0.0928306	0.846559	2.864
oligouridylate-binding protein 1-like [Phalaenopsis equestris]	1	1	XP_020574257.1	AT3G14100	nucleus	20234.9	8158.11	20941.1	10118.1	0.966278	0.936492
nuclear transcription factor Y subunit C-2-like [Phalaenopsis equestris]	1	1	XP_020577550.1	AT1G56170	nucleus	0	NA	13008.1	3971.84	N/A	N/A
V-type proton ATPase subunit D [Phalaenopsis equestris]	1	1	XP_020588936.1	AT3G58730	vacuole,golgi	20366.1	1750.7	15996.6	3501.78	1.27315	0.245885
coatomer subunit beta-1-like [Dendrobium catenatum]	1	1	XP_020688949.1	AT4G31480	cytosol	9263.57	502.134	16322.5	7337.76	0.567533	0.329411
peroxisomal adenine nucleotide carrier 1-like [Phalaenopsis equestris]	1	1	XP_020579239.1	AT3G05290	peroxisome	8861.3	1245.46	13217.6	6174.49	0.670416	0.501181
V-type proton ATPase 16 kDa proteolipid subunit-like [Phalaenopsis equestris]	1	1	XP_020573602.1	AT4G38920	vacuole	16057.7	3756.73	21155	12073.9	0.759047	0.619486
ABC transporter C family member 4 [Dendrobium catenatum]	1	1	XP_020693504.1	AT3G62700	vacuole	7805.96	2612.88	10626.4	8860.6	0.73458	0.670554
ABC transporter C family member 2 [Dendrobium catenatum]	1	1	XP_020673777.2	AT1G30400	vacuole	0	NA	19769.8	15130.5	N/A	N/A
putative G3BP-like protein [Dendrobium catenatum]	1	1	XP_020690900.2	AT3G25150	nucleus	20926.1	0	17623.8	9052.4	1.18737	N/A
translocase of chloroplast 34, chloroplastic-like [Phalaenopsis equestris]	1	1	XP_020588120.1	AT5G05000	plastid	8652.9	181.868	0	NA	N/A	N/A

## Sheet: Supplementary Table S2b
Supplementary Table S2. Results of proteome profiling. Supplementary table to Figure 2, 3, 6, and 7.
Tble S2b. All identified proteins and peptides.
Protein FDR Confidence: Combined	Accession	Description	Exp. q-value: Combined	Sum PEP Score	Coverage [%]	# Peptides	# PSMs	# Unique Peptides	# AAs	Score MS Amanda 2.0: A MS Amanda 2.0	Score Sequest HT: A Sequest HT	Modifications
High	XP_020598443.1	ATP synthase subunit beta, mitochondrial [Phalaenopsis equestris]	0	248.659	60	30	292	24	558	47725.4	454.73
High	XP_020671950.1	glucose-1-phosphate adenylyltransferase small subunit, chloroplastic/amyloplastic [Dendrobium catenatum]	0	135.674	51	25	155	21	521	26912.9	103.03
High	XP_020674602.1	UTP--glucose-1-phosphate uridylyltransferase [Dendrobium catenatum]	0	113.884	32	19	185	19	472	37566.7	105.63
High	XP_020590264.1	chaperonin CPN60-2, mitochondrial [Phalaenopsis equestris]	0	103.458	36	21	141	17	580	30088.6	47.4
High	XP_020590963.1	V-type proton ATPase subunit B 2 [Phalaenopsis equestris]	0	84.02	50	18	102	16	488	16648.8	79.49
High	XP_020702876.1	catalase isozyme A [Dendrobium catenatum]	0	153.615	44	19	201	14	492	41127.1	194.81
High	XP_020581874.1	heat shock protein 90-5, chloroplastic [Phalaenopsis equestris]	0	104.762	28	17	117	13	799	23402.8	115.21
High	XP_020677749.1	heat shock 70 kDa protein, mitochondrial [Dendrobium catenatum]	0	116.77	42	22	96	13	677	12485	159.88
High	XP_020584220.1	GTP-binding nuclear protein Ran1A [Phalaenopsis equestris]	0	37.909	61	12	62	12	221	9762.42	14.71	Acetyl [N-Term]; Met-loss+Acetyl [N-Term]
High	XP_028555633.1	pyruvate kinase, cytosolic isozyme [Dendrobium catenatum]	0	50.821	32	12	63	11	510	12220.6	4.32	Met-loss+Acetyl [N-Term]
High	O03042	Ribulose bisphosphate carboxylase large chain OS=Arabidopsis thaliana GN=rbcL PE=1 SV=1	0	65.932	39	14	78	10	479		146.51
High	P04264	SWISS-PROT:P04264 Tax_Id=9606 Gene_Symbol=KRT1 Keratin, type II cytoskeletal 1	0	49.116	20	11	36	10	644	8623.02
High	XP_020699998.1	proteasome subunit alpha type-7 [Dendrobium catenatum]	0	43.845	53	10	56	10	249	9657.87	62.95
High	XP_020700045.1	glucose-1-phosphate adenylyltransferase large subunit 1 [Dendrobium catenatum]	0	60.423	17	10	46	10	524	10454.7	3.35
High	XP_020703169.1	ruBisCO large subunit-binding protein subunit alpha [Dendrobium catenatum]	0	133.802	38	23	146	10	580	20446.6	308.64
High	XP_028554919.1	6-phosphogluconate dehydrogenase, decarboxylating 1 [Dendrobium catenatum]	0	96.555	24	10	119	10	485	20032.5	203.23
High	XP_020586991.1	proteasome subunit alpha type-1-A-like [Phalaenopsis equestris]	0	44.075	33	9	39	9	269	9184.24	13.89
High	XP_020676963.1	cell division cycle protein 48 homolog [Dendrobium catenatum]	0	112.679	29	24	62	9	809	11646.2	27.42
High	XP_020685450.1	T-complex protein 1 subunit eta [Dendrobium catenatum]	0	35.507	25	9	42	9	561	6183.35	19.5
High	XP_020581167.1	beta-glucosidase 1-like [Phalaenopsis equestris]	0	34.59	16	10	85	8	515	15397.8
High	XP_020581168.1	V-type proton ATPase catalytic subunit A [Phalaenopsis equestris]	0	59.107	30	13	74	8	621	14003.1	27.29
High	XP_020675034.1	40S ribosomal protein S3-3 [Dendrobium catenatum]	0	40.114	36	8	50	8	239	10180.7	8.16
High	XP_020676129.1	betaine aldehyde dehydrogenase 1, chloroplastic [Dendrobium catenatum]	0	36.608	23	8	53	8	503	7768.76	56.22
High	XP_020678038.1	40S ribosomal protein S6-like [Dendrobium catenatum]	0	49.123	37	8	44	8	249	11809.5
High	XP_020680184.1	60S ribosomal protein L8-like [Dendrobium catenatum]	0	27.921	36	8	28	8	261	5535.33	0
High	XP_020685547.1	proteasome subunit alpha type-5 [Dendrobium catenatum]	0	37.227	62	10	57	8	237	9665.29	28.28
High	XP_028551582.1	adenosylhomocysteinase isoform X1 [Dendrobium catenatum]	0	77.638	35	16	108	8	486	16709.6	83.2
High	Q9LJE4	Chaperonin 60 subunit beta 2, chloroplastic OS=Arabidopsis thaliana GN=CPN60B2 PE=1 SV=1	0	57.585	24	12	65	7	596		166.72
High	XP_020572671.1	60S ribosomal protein L10 [Phalaenopsis equestris]	0	21.472	36	7	27	7	224	4134.13	18.82
High	XP_020574786.1	succinate--CoA ligase [ADP-forming] subunit alpha, mitochondrial [Phalaenopsis equestris]	0	41.563	25	7	46	7	339	9202.48	18.16
High	XP_020574948.1	40S ribosomal protein S5-like isoform X2 [Phalaenopsis equestris]	0	34.962	28	7	50	7	211	11519.6
High	XP_020576494.1	alpha-glucan phosphorylase, H isozyme [Phalaenopsis equestris]	0	33.873	10	7	39	7	843	8017.03	14.27
High	XP_020578454.1	T-complex protein 1 subunit zeta 1 [Phalaenopsis equestris]	0	26.043	18	7	41	7	535	6646.16	18.06
High	XP_020583866.1	probable mitochondrial-processing peptidase subunit beta, mitochondrial [Phalaenopsis equestris]	0	32.186	23	7	51	7	522	8123.59	52.71
High	XP_020587705.1	malate dehydrogenase, mitochondrial-like [Phalaenopsis equestris]	0	78.047	23	7	93	7	349	20842	87.96
High	XP_020673233.1	40S ribosomal protein S9-2-like [Dendrobium catenatum]	0	18.832	36	7	24	7	200	4248.99	9.61
High	XP_020673339.1	sucrose synthase 2 [Dendrobium catenatum]	0	121.963	25	21	99	7	816	20940.8	32.85
High	XP_020675170.1	26S proteasome non-ATPase regulatory subunit 2 homolog A-like [Dendrobium catenatum]	0	22.15	13	7	21	7	891	3739.48	3.51
High	XP_020676537.1	proteasome subunit alpha type-2-B [Dendrobium catenatum]	0	62.404	49	8	68	7	235	15108.6	41.78	Met-loss+Acetyl [N-Term]
High	XP_020684556.1	calreticulin [Dendrobium catenatum]	0	34.999	15	9	43	7	424	9342.06	0
High	XP_020689197.1	histone H2B.7 [Dendrobium catenatum]	0	34.477	39	7	43	7	160	7146.95	50.38
High	XP_020694133.1	pyrophosphate-energized vacuolar membrane proton pump [Dendrobium catenatum]	0	37.248	11	7	40	7	767	6306.36	74.09
High	XP_020695658.1	aspartate aminotransferase, cytoplasmic [Dendrobium catenatum]	0	31.392	16	8	58	7	456	9551.71	30.98
High	XP_020696983.1	GDP-mannose 3,5-epimerase 1 [Dendrobium catenatum]	0	38.528	23	7	58	7	378	13062.1	0
High	XP_020705961.1	proteasome subunit alpha type-6 [Dendrobium catenatum]	0	32.395	42	8	42	7	246	8603.47
High	YP_006073272.1	ATP synthase CF1 beta subunit (chloroplast) [Phalaenopsis equestris]	0	42.708	25	9	33	7	498	5702.6	7.49
High	XP_020584744.1	proteasome subunit beta type-4 [Phalaenopsis equestris]	0	36.387	43	6	56	6	246	13113.2	20.95
High	XP_020585303.1	heat shock protein 83 [Phalaenopsis equestris]	0	39.753	17	9	52	6	703	10521.9	4.84
High	XP_020588921.1	40S ribosomal protein S18-like [Phalaenopsis equestris]	0	43.451	42	7	48	6	152	11580.5	0	Met-loss+Acetyl [N-Term]; Acetyl [N-Term]
High	XP_020590218.1	60S ribosomal protein L11 [Phalaenopsis equestris]	0	27.339	29	6	41	6	183	9297.8
High	XP_020592106.1	2-isopropylmalate synthase A-like [Phalaenopsis equestris]	0	30.487	14	6	35	6	620	7917.71	16.7
High	XP_020593985.1	lactoylglutathione lyase [Phalaenopsis equestris]	0	47.816	24	8	57	6	293	6429.16	136.4
High	XP_020595253.1	60S acidic ribosomal protein P0-like [Phalaenopsis equestris]	0	24.085	23	6	30	6	321	5059.84	14.05
High	XP_020672422.1	ketol-acid reductoisomerase, chloroplastic [Dendrobium catenatum]	0	60.751	20	8	53	6	595	8865.11	93.81
High	XP_020672782.1	ferredoxin--nitrite reductase, chloroplastic [Dendrobium catenatum]	0	33.758	11	6	41	6	601	9119.96	0
High	XP_020674552.1	hsp70-Hsp90 organizing protein 3 [Dendrobium catenatum]	0	36.421	15	6	43	6	577	9404.96	26.93
High	XP_020675502.1	40S ribosomal protein S3a [Dendrobium catenatum]	0	43.275	25	6	40	6	261	9952.94	12.79
High	XP_020678204.1	formate dehydrogenase 1, mitochondrial [Dendrobium catenatum]	0	67.973	25	9	62	6	382	13849.5	22.93
High	XP_020678598.1	D-3-phosphoglycerate dehydrogenase 3, chloroplastic [Dendrobium catenatum]	0	30.631	12	6	56	6	627	12229
High	XP_020680139.1	chaperone protein ClpB1 [Dendrobium catenatum]	0	18.47	11	6	24	6	914	4810.61	6.28
High	XP_020680578.1	elongation factor 1-alpha [Dendrobium catenatum]	0	188.456	56	23	296	6	447	51421.1	317.86
High	XP_020680920.1	phosphoglycerate kinase, cytosolic isoform X2 [Dendrobium catenatum]	0	139.928	38	16	176	6	401	37977.2	159.17
High	XP_020682149.1	peptidyl-prolyl cis-trans isomerase CYP19-4 [Dendrobium catenatum]	0	49.462	44	8	54	6	207	11396.4	46.2
High	XP_020682852.1	protein BTR1 [Dendrobium catenatum]	0	22.218	19	6	32	6	337	6629.59	2.71
High	XP_020685919.1	endoplasmin homolog [Dendrobium catenatum]	0	66.805	16	12	73	6	819	18460.3
High	XP_020686815.1	40S ribosomal protein S14 [Dendrobium catenatum]	0	20.675	32	6	31	6	151	4755.48	19.16
High	XP_020687421.1	tubulin alpha-3 chain [Dendrobium catenatum]	0	104.404	52	16	102	6	450	19121.2	74.19
High	XP_020689146.1	glyoxysomal fatty acid beta-oxidation multifunctional protein MFP-a isoform X1 [Dendrobium catenatum]	0	48.5	13	6	44	6	723	10018.4	10.85
High	XP_020691332.1	protein IN2-1 homolog B [Dendrobium catenatum]	0	34.647	20	6	55	6	241	10294.2
High	XP_020701610.1	heat shock 70 kDa protein 14 [Dendrobium catenatum]	0	21.232	10	6	21	6	841	4233.17	2.08
High	XP_020702284.1	malate dehydrogenase isoform X1 [Dendrobium catenatum]	0	61.733	32	12	101	6	332	17370.4	65.05
High	XP_028550552.1	CBS domain-containing protein CBSX3, mitochondrial-like [Dendrobium catenatum]	0	26.806	21	6	38	6	205	6400.6	15.36
High	XP_028553712.1	eukaryotic initiation factor 4A-8 [Dendrobium catenatum]	0	94.83	36	11	146	6	413	31845.3	42.3
High	P00761 SWISS-PROT:P00761	Trypsin - Sus scrofa (Pig).	0	69.935	33	5	108	5	231	30324.1
High	P10896	Ribulose bisphosphate carboxylase/oxygenase activase, chloroplastic OS=Arabidopsis thaliana GN=RCA PE=1 SV=2	0	24.634	17	5	10	5	474		27.66
High	P35527	SWISS-PROT:P35527 Tax_Id=9606 Gene_Symbol=KRT9 Keratin, type I cytoskeletal 9	0	16.098	9	5	9	5	623	1828.56
High	XP_020570797.1	60S ribosomal protein L23 isoform X1 [Phalaenopsis equestris]	0	27.203	50	6	27	5	146	5411.88
High	XP_020572667.1	leucine aminopeptidase 2, chloroplastic-like [Phalaenopsis equestris]	0	49.537	19	9	78	5	527	11501.3	56.32
High	XP_020572960.1	LOW QUALITY PROTEIN: UDP-arabinopyranose mutase 1-like [Phalaenopsis equestris]	0	26.797	19	5	29	5	379	6313.29	4.41
High	XP_020574558.1	tubulin beta chain-like [Phalaenopsis equestris]	0	87.624	36	12	112	5	444	26936.5	4.37
High	XP_020577031.1	prohibitin-1, mitochondrial-like [Phalaenopsis equestris]	0	29.557	28	5	25	5	289	5186.9	13.59
High	XP_020577583.1	plastidial pyruvate kinase 2 [Phalaenopsis equestris]	0	14.501	11	5	11	5	578	1591.3	10.79
High	XP_020578087.1	probable glutathione S-transferase GSTF1 [Phalaenopsis equestris]	0	107.658	23	7	204	5	217	54452.1
High	XP_020578502.1	NADP-dependent glyceraldehyde-3-phosphate dehydrogenase [Phalaenopsis equestris]	0	20.985	17	5	21	5	496	3423.23	9.96
High	XP_020581681.1	primary amine oxidase-like [Phalaenopsis equestris]	0	19.627	7	5	27	5	711	6078.57
High	XP_020582286.1	heat shock protein 81-1 [Phalaenopsis equestris]	0	130.697	30	21	141	5	700	28801.3	83.73
High	XP_020582993.1	ADP-ribosylation factor 2-like [Phalaenopsis equestris]	0	34.943	50	5	26	5	181	4690.21	5.13
High	XP_020584394.1	26S protease regulatory subunit 6B homolog [Phalaenopsis equestris]	0	31.385	24	6	25	5	419	4707.14	4.99
High	XP_020586628.1	acetyl-CoA carboxylase 1-like [Phalaenopsis equestris]	0	43.966	9	12	19	5	2264	2845.66	21.11
High	XP_020587225.1	prohibitin-3, mitochondrial-like [Phalaenopsis equestris]	0	28.072	27	5	33	5	286	7427.48	5.69
High	XP_020589611.1	pathogenesis-related protein 1-like [Phalaenopsis equestris]	0	95.745	32	5	665	5	158	165219	27.81
High	XP_020591087.1	dihydrolipoyllysine-residue acetyltransferase component 2 of pyruvate dehydrogenase complex, mitochondrial-like isoform X1 [Phalaenopsis equestris]	0	11.551	18	5	7	5	543	335.31	11.97
High	XP_020593446.1	14-3-3-like protein B [Phalaenopsis equestris]	0	41.366	34	7	40	5	261	6727.89	72.04
High	XP_020599017.1	serine/threonine-protein phosphatase 2A 65 kDa regulatory subunit A beta isoform [Phalaenopsis equestris]	0	25.652	14	5	17	5	587	2360.25	42.87	Met-loss+Acetyl [N-Term]
High	XP_020671809.2	dihydropyrimidinase-like [Dendrobium catenatum]	0	10.629	14	5	14	5	533	1472.95	15.42
High	XP_020672846.1	ubiquitin carboxyl-terminal hydrolase 13 isoform X1 [Dendrobium catenatum]	0	14.324	5	5	22	5	1149	4416.62
High	XP_020673164.2	alpha-1,4 glucan phosphorylase L isozyme, chloroplastic/amyloplastic isoform X1 [Dendrobium catenatum]	0	94.988	13	10	93	5	984	22048.4	24.44
High	XP_020675421.1	nucleoside diphosphate kinase 1 [Dendrobium catenatum]	0	70.339	61	5	97	5	111	22047.5	123.26	Acetyl [N-Term]
High	XP_020675747.1	phosphoenolpyruvate carboxylase 2 [Dendrobium catenatum]	0	49.1	17	12	75	5	964	11133.5	57.05
High	XP_020676442.1	probable fructokinase-1 [Dendrobium catenatum]	0	40.982	27	10	56	5	327	11671.3
High	XP_020684321.1	40S ribosomal protein S17-3-like [Dendrobium catenatum]	0	32.631	24	5	43	5	139	9598.58
High	XP_020685038.1	cysteine synthase isoform X1 [Dendrobium catenatum]	0	13.876	23	5	26	5	396	2363.6	27.74
High	XP_020689967.1	obg-like ATPase 1 [Dendrobium catenatum]	0	32.568	21	5	38	5	395	8374.34	15.24
High	XP_020690055.1	nascent polypeptide-associated complex subunit alpha-like protein 1 [Dendrobium catenatum]	0	45.87	29	7	48	5	201	11193.3	12.31
High	XP_020690157.2	sorbitol dehydrogenase [Dendrobium catenatum]	0	24.249	18	6	30	5	357	6475.48
High	XP_020690760.1	glutelin type-A 1 [Dendrobium catenatum]	0	37.818	24	5	75	5	357	5111.08	206.25
High	XP_020692467.1	enolase 2 [Dendrobium catenatum]	0	179.481	45	20	409	5	445	49071.1	784.77
High	XP_020694726.1	ribulose bisphosphate carboxylase/oxygenase activase, chloroplastic isoform X1 [Dendrobium catenatum]	0	17.593	13	5	8	5	477	875.42	8.04
High	XP_020694860.1	serine carboxypeptidase-like [Dendrobium catenatum]	0	18.305	17	6	10	5	501	1557.6	0
High	XP_020696628.1	ubiquitin-conjugating enzyme E2 36 [Dendrobium catenatum]	0	17.774	57	5	19	5	153	3210.86	3.41
High	XP_020699154.1	glutamate decarboxylase-like [Dendrobium catenatum]	0	33.62	13	5	34	5	509	7914.12	6.74
High	XP_028551140.1	uncharacterized protein LOC110096380 isoform X1 [Dendrobium catenatum]	0	58.818	26	10	74	5	441	17636	9.38
High	F4JWS8	Cytochrome b-c1 complex subunit 7-2 OS=Arabidopsis thaliana GN=QCR7-2 PE=1 SV=1	0	10.322	26	4	9	4	122		15.27
High	P00333	Alcohol dehydrogenase 1 OS=Zea mays GN=ADH1 PE=2 SV=1	0	16.456	6	4	57	4	379		64.2
High	P10795	Ribulose bisphosphate carboxylase small chain 1A, chloroplastic OS=Arabidopsis thaliana GN=RBCS-1A PE=1 SV=2	0	56.786	53	10	127	4	180		396.56
High	P36183	Endoplasmin homolog OS=Hordeum vulgare PE=2 SV=1	0	22.55	7	6	39	4	809		57.65
High	Q03033	Elongation factor 1-alpha OS=Triticum aestivum GN=TEF1 PE=2 SV=1	0	33.703	23	10	37	4	447		55.53
High	Q6K9N6	Succinyl-CoA ligase [ADP-forming] subunit beta, mitochondrial OS=Oryza sativa subsp. japonica GN=Os02g0621700 PE=1 SV=1	0	13.697	7	4	13	4	422		16.06
High	Q96291	2-Cys peroxiredoxin BAS1, chloroplastic OS=Arabidopsis thaliana GN=BAS1 PE=1 SV=2	0	14.588	24	4	7	4	266		18.38
High	Q9FGX1	ATP-citrate synthase beta chain protein 2 OS=Arabidopsis thaliana GN=ACLB-2 PE=1 SV=1	0	19.675	9	4	22	4	608		43.01
High	XP_020571861.1	ruBisCO large subunit-binding protein subunit beta, chloroplastic [Phalaenopsis equestris]	0	137.465	36	22	146	4	611	21039.6	253.21
High	XP_020572452.1	phospholipase D alpha 1 [Phalaenopsis equestris]	0	139.008	24	20	167	4	814	40182	7.82
High	XP_020573218.1	40S ribosomal protein S13 isoform X1 [Phalaenopsis equestris]	0	10.712	22	4	17	4	151	3013.9
High	XP_020575134.1	60S ribosomal protein L21-1 [Phalaenopsis equestris]	0	12.529	37	4	17	4	164	1539.2	42.73
High	XP_020575828.1	elongation factor 1-alpha-like [Phalaenopsis equestris]	0	157.391	48	20	243	4	447	45560.9	200.15
High	XP_020576872.1	guanosine nucleotide diphosphate dissociation inhibitor 2-like [Phalaenopsis equestris]	0	7.297	18	4	7	4	445	427.6	14.87
High	XP_020576978.1	ribonuclease TUDOR 1-like [Phalaenopsis equestris]	0	17.774	6	4	8	4	992	1570.65
High	XP_020577518.1	enolase 2-like [Phalaenopsis equestris]	0	129.962	41	18	265	4	445	27946.5	578.88
High	XP_020578222.1	catalase isozyme 1 [Phalaenopsis equestris]	0	54.202	21	8	80	4	492	19226
High	XP_020578453.1	26S protease regulatory subunit 7 [Phalaenopsis equestris]	0	21.844	15	4	26	4	425	6679.03
High	XP_020578522.1	ADP,ATP carrier protein 1, mitochondrial-like [Phalaenopsis equestris]	0	35.823	17	8	63	4	382	7825.62	61.65
High	XP_020579386.1	pectin acetylesterase 11-like [Phalaenopsis equestris]	0	31.181	12	4	31	4	397	7595.81
High	XP_020580361.1	apoptosis-inducing factor homolog B-like [Phalaenopsis equestris]	0	16.178	14	5	25	4	360	4654.91
High	XP_020580429.1	membrane steroid-binding protein 2-like [Phalaenopsis equestris]	0	25.285	21	4	25	4	269	5649.51	13.01
High	XP_020580474.1	proline--tRNA ligase, cytoplasmic isoform X1 [Phalaenopsis equestris]	0	20.273	10	4	23	4	507	4937.47
High	XP_020581044.1	bifunctional L-3-cyanoalanine synthase/cysteine synthase 1, mitochondrial [Phalaenopsis equestris]	0	10.89	17	4	7	4	364	816.01	4.85
High	XP_020582829.1	phosphoglucomutase, chloroplastic isoform X1 [Phalaenopsis equestris]	0	27.461	14	8	36	4	601	6324.25	15.16
High	XP_020583360.1	UDP-glucuronic acid decarboxylase 6 [Phalaenopsis equestris]	0	18.086	19	4	19	4	349	1218.37	32.07
High	XP_020584863.1	probable 60S ribosomal protein L14 [Phalaenopsis equestris]	0	25.221	27	4	27	4	134	7473.73
High	XP_020586998.1	60S ribosomal protein L7a-1-like [Phalaenopsis equestris]	0	19.501	19	4	24	4	258	5005.68
High	XP_020587215.1	pyruvate dehydrogenase E1 component subunit alpha-3, chloroplastic isoform X1 [Phalaenopsis equestris]	0	10.997	15	4	12	4	434	649.95	15
High	XP_020589232.1	cysteine synthase [Phalaenopsis equestris]	0	86.853	41	11	138	4	325	26837.2	111.91
High	XP_020589462.1	probable histone H2A.3 [Phalaenopsis equestris]	0	43.124	59	6	60	4	134	2037.46	233.95
High	XP_020591007.1	glutamate-1-semialdehyde 2,1-aminomutase, chloroplastic-like [Phalaenopsis equestris]	0	12.608	13	4	15	4	472	3058.17
High	XP_020591755.1	isoflavone reductase homolog isoform X1 [Phalaenopsis equestris]	0	15.803	15	5	29	4	310	4457.04	19.68
High	XP_020591992.1	alcohol dehydrogenase-like [Phalaenopsis equestris]	0	107.651	33	11	205	4	380	35900.6	255.99	Met-loss [N-Term]
High	XP_020592442.1	LOW QUALITY PROTEIN: T-complex protein 1 subunit delta-like [Phalaenopsis equestris]	0	10.833	9	4	17	4	538	2085.72	14.93
High	XP_020592944.1	glyceraldehyde-3-phosphate dehydrogenase A, chloroplastic [Phalaenopsis equestris]	0	17.646	18	5	11	4	406	2084.64	0
High	XP_020593234.1	14-3-3-like protein 16R [Phalaenopsis equestris]	0	77.309	40	8	88	4	255	14125.1	213.72
High	XP_020597188.1	GTP-binding protein SAR1A [Phalaenopsis equestris]	0	22.584	29	4	31	4	193	7864.61
High	XP_020598493.1	LOW QUALITY PROTEIN: peroxidase 12-like [Phalaenopsis equestris]	0	36.896	12	5	51	4	344	15288
High	XP_020598627.1	dnaJ protein homolog [Phalaenopsis equestris]	0	10.067	11	4	15	4	418	2333.29
High	XP_020599124.1	ras-related protein RABB1c [Phalaenopsis equestris]	0	32.428	55	7	35	4	211	7061.51	4.56
High	XP_020599658.1	malate dehydrogenase, glyoxysomal [Phalaenopsis equestris]	0	18.024	15	4	23	4	357	4514.76	6.86
High	XP_020600383.1	mitochondrial import receptor subunit TOM40-1 [Phalaenopsis equestris]	0	11.899	28	4	12	4	327	1594	3.65
High	XP_020672434.1	ras-related protein Rab7-like isoform X1 [Dendrobium catenatum]	0	13.374	18	4	12	4	233	2054.81	7.18
High	XP_020673292.1	heat shock protein 81-1-like [Dendrobium catenatum]	0	154.513	32	21	176	4	700	35720.4	180.8	Met-loss+Acetyl [N-Term]
High	XP_020673612.1	elongation factor 2 [Dendrobium catenatum]	0	186.654	46	25	229	4	843	37949.6	423.51
High	XP_020674150.1	extensin-2 [Dendrobium catenatum]	0	17.16	34	4	10	4	1176	1972.45
High	XP_020675739.1	glutamine synthetase nodule isozyme [Dendrobium catenatum]	0	26.472	29	5	26	4	357	3244.01	46.79	Met-loss [N-Term]
High	XP_020678797.1	ras-related protein RABA2a-like [Dendrobium catenatum]	0	11.944	20	4	15	4	218	2824.61
High	XP_020679106.1	T-complex protein 1 subunit epsilon [Dendrobium catenatum]	0	18.165	18	5	6	4	535	783.81	11.74
High	XP_020680158.1	glyoxylate/succinic semialdehyde reductase 1 [Dendrobium catenatum]	0	16.798	17	4	17	4	294	3834.75
High	XP_020682090.1	tubulin beta chain [Dendrobium catenatum]	0	70.445	31	11	74	4	442	18922.6	7.13
High	XP_020683199.1	probable glutathione S-transferase GSTF1 [Dendrobium catenatum]	0	42.002	14	6	128	4	217	26332.4
High	XP_020683790.1	3-isopropylmalate dehydratase small subunit 3 [Dendrobium catenatum]	0	12.401	23	4	27	4	254	2875.31	38.83
High	XP_020683921.1	pyruvate decarboxylase 1 [Dendrobium catenatum]	0	15.494	12	5	12	4	602	2256.45	4.19
High	XP_020683987.1	alpha-glucan water dikinase, chloroplastic [Dendrobium catenatum]	0	33.555	6	5	37	4	1476	6267.81	41.01
High	XP_020684559.1	methylenetetrahydrofolate reductase 1 [Dendrobium catenatum]	0	16.029	11	4	13	4	594	1009.22	28.12
High	XP_020684771.1	ubiquitin-40S ribosomal protein S27a [Dendrobium catenatum]	0	50.325	40	7	87	4	156	21187.8	0
High	XP_020685101.1	NADH-cytochrome b5 reductase-like protein isoform X1 [Dendrobium catenatum]	0	22.008	10	4	24	4	325	5485.15
High	XP_020687010.1	uncharacterized protein LOC110102859 [Dendrobium catenatum]	0	14.528	10	4	22	4	381	3996.93
High	XP_020687250.1	eukaryotic translation initiation factor 2 subunit alpha homolog [Dendrobium catenatum]	0	19.614	11	4	13	4	343	3180.35
High	XP_020687341.1	methylthioribose kinase [Dendrobium catenatum]	0	9.776	12	4	11	4	422	1930.73	3.05
High	XP_020688567.1	sucrose synthase 4 [Dendrobium catenatum]	0	55.637	14	10	75	4	806	17858.6
High	XP_020689281.1	elongation factor Tu, chloroplastic [Dendrobium catenatum]	0	15.884	13	4	24	4	482	5432.94	2.69
High	XP_020689384.1	2,3-bisphosphoglycerate-independent phosphoglycerate mutase [Dendrobium catenatum]	0	52.868	22	9	88	4	559	10047	171.22
High	XP_020689606.1	ATP-dependent Clp protease proteolytic subunit 5, chloroplastic [Dendrobium catenatum]	0	21.765	25	5	32	4	291	5287.83	16.13
High	XP_020689610.1	selenium-binding protein 2-like [Dendrobium catenatum]	0	24.905	18	5	38	4	492	5915.49	29.57
High	XP_020689727.1	fructose-bisphosphate aldolase 1, chloroplastic [Dendrobium catenatum]	0	16.9	14	5	10	4	389	1862.97
High	XP_020693310.1	histone H4 [Dendrobium catenatum]	0	85.326	62	13	116	4	103	26362.9	4.11
High	XP_020693706.1	L-ascorbate peroxidase, cytosolic [Dendrobium catenatum]	0	22.283	23	4	30	4	250	5994.41
High	XP_020695498.1	pyruvate dehydrogenase E1 component subunit alpha-1, mitochondrial [Dendrobium catenatum]	0	27.133	13	4	26	4	391	6342.17
High	XP_020696236.1	xylose isomerase isoform X1 [Dendrobium catenatum]	0	16.331	13	4	25	4	483	4228.87	18.25
High	XP_020696634.1	argininosuccinate synthase, chloroplastic [Dendrobium catenatum]	0	18.185	12	5	15	4	516	2722.12
High	XP_020696985.1	60S ribosomal protein L4-1-like [Dendrobium catenatum]	0	12.745	13	4	18	4	408	1482.31	28.66
High	XP_020697323.1	heterogeneous nuclear ribonucleoprotein Q [Dendrobium catenatum]	0	9.346	9	4	20	4	481	3371.43
High	XP_020697676.1	formate--tetrahydrofolate ligase [Dendrobium catenatum]	0	11.961	10	4	13	4	636	1701.56	5.05
High	XP_020701640.1	calmodulin isoform X1 [Dendrobium catenatum]	0	51.872	51	4	40	4	180	2579.62	161.39	Met-loss+Acetyl [N-Term]
High	XP_020702381.1	fructokinase-1 [Dendrobium catenatum]	0	36.085	19	8	70	4	330	12152.4	56.3
High	XP_020702631.1	26S proteasome non-ATPase regulatory subunit 7 homolog A [Dendrobium catenatum]	0	15.346	22	4	24	4	310	3581.91	8.99
High	XP_020703048.1	60S ribosomal protein L10a [Dendrobium catenatum]	0	11.047	15	4	17	4	216	3390.81
High	XP_020703956.1	ruBisCO large subunit-binding protein subunit beta, chloroplastic [Dendrobium catenatum]	0	124.48	43	22	155	4	611	22150.7	247.11
High	XP_020704108.1	alanine aminotransferase 2 [Dendrobium catenatum]	0	9.811	10	4	22	4	526	1824.71	25.33
High	XP_020704871.1	heat shock cognate 70 kDa protein 2 [Dendrobium catenatum]	0	257.446	64	35	339	4	647	74465.2	264.29	Met-loss+Acetyl [N-Term]
High	XP_020705389.1	bifunctional aspartate aminotransferase and glutamate/aspartate-prephenate aminotransferase [Dendrobium catenatum]	0	12.69	12	4	18	4	470	1750.32	19.66
High	XP_020706030.1	40S ribosomal protein S23 [Dendrobium catenatum]	0	12.498	36	4	14	4	142	2810.39	8.87
High	XP_020706127.1	putative aconitate hydratase, cytoplasmic [Dendrobium catenatum]	0	56.643	20	12	65	4	899	9215.83	91.14
High	XP_028555608.1	40S ribosomal protein S15a [Dendrobium catenatum]	0	32.212	35	4	35	4	130	10640.4
High	YP_009472263.1	photosystem II 44 kDa protein (chloroplast) [Dendrobium catenatum]	0	10.036	17	4	7	4	473	967.45	2.77
High	A2XRZ0	Probable aldo-keto reductase 2 OS=Oryza sativa subsp. indica GN=OsI_15387 PE=3 SV=1	0	35.58	24	8	24	3	351		58.71
High	ENSEMBL:ENSBTAP00000016242	(Bos taurus) similar to alpha-tubulin I isoform 1	0	25.724	10	4	29	3	451	8158.3
High	O03986	Heat shock protein 90-4 OS=Arabidopsis thaliana GN=HSP90-4 PE=2 SV=1	0	40.831	20	10	55	3	699		136.41
High	O04499	2,3-bisphosphoglycerate-independent phosphoglycerate mutase 1 OS=Arabidopsis thaliana GN=PGM1 PE=2 SV=3	0	6.051	4	3	8	3	557		0
High	O50008	5-methyltetrahydropteroyltriglutamate--homocysteine methyltransferase OS=Arabidopsis thaliana GN=CIMS PE=1 SV=1	0	26.131	19	10	22	3	765		37.22
High	O65282	20 kDa chaperonin, chloroplastic OS=Arabidopsis thaliana GN=CPN21 PE=1 SV=2	0	9.772	21	3	10	3	253		6.51
High	P08927	RuBisCO large subunit-binding protein subunit beta, chloroplastic OS=Pisum sativum PE=1 SV=2	0	20.76	19	9	29	3	595		27.32
High	P0CJ48	Chlorophyll a-b binding protein 2, chloroplastic OS=Arabidopsis thaliana GN=LHCB1.1 PE=1 SV=1	0	19.468	19	3	42	3	267		61.1
High	P10798	Ribulose bisphosphate carboxylase small chain 3B, chloroplastic OS=Arabidopsis thaliana GN=RBCS-3B PE=1 SV=2	0	46.845	53	9	73	3	181		183.36
High	P12886	Alcohol dehydrogenase 1 OS=Pisum sativum PE=3 SV=1	0	21.881	10	3	28	3	380		67.78
High	P21238	Chaperonin 60 subunit alpha 1, chloroplastic OS=Arabidopsis thaliana GN=CPN60A1 PE=1 SV=2	0	17.801	13	6	10	3	586		15.79
High	P25857	Glyceraldehyde-3-phosphate dehydrogenase B, chloroplastic OS=Arabidopsis thaliana GN=GAPB PE=1 SV=2	0	9.848	9	3	3	3	447		7.28
High	P27480	Linoleate 9S-lipoxygenase 1 OS=Phaseolus vulgaris GN=LOXA PE=3 SV=1	0	5.659	4	3	8	3	862		3.11
High	P29185	Chaperonin CPN60-1, mitochondrial OS=Zea mays GN=CPN60I PE=1 SV=2	0	17.735	12	6	21	3	577		4.8
High	P37830	Glucose-6-phosphate 1-dehydrogenase, cytoplasmic isoform OS=Solanum tuberosum GN=G6PDH PE=2 SV=1	0	12.369	6	4	25	3	511		25.96
High	P41382	Eukaryotic initiation factor 4A-10 OS=Nicotiana tabacum PE=2 SV=1	0	14.042	18	8	13	3	413		7.1
High	P49688	40S ribosomal protein S2-3 OS=Arabidopsis thaliana GN=RPS2C PE=1 SV=2	0	8.983	9	3	5	3	285		8.61
High	P52903	Pyruvate dehydrogenase E1 component subunit alpha, mitochondrial OS=Solanum tuberosum PE=1 SV=1	0	11.033	12	3	12	3	391		25.34
High	Q2RBN7	Clathrin heavy chain 1 OS=Oryza sativa subsp. japonica GN=Os11g0104900 PE=3 SV=1	0	15.069	5	6	25	3	1708		40.84	Met-loss+Acetyl [N-Term]
High	Q38900	Peptidyl-prolyl cis-trans isomerase CYP19-1 OS=Arabidopsis thaliana GN=CYP19-1 PE=1 SV=1	0	41.45	27	3	51	3	173		228.93
High	Q39613	Peptidyl-prolyl cis-trans isomerase OS=Catharanthus roseus GN=PCKR1 PE=2 SV=1	0	33.669	24	4	59	3	172		105.6
High	Q42971	Enolase OS=Oryza sativa subsp. japonica GN=ENO1 PE=1 SV=2	0	31.347	25	10	39	3	446		53.86
High	Q43117	Pyruvate kinase isozyme A, chloroplastic OS=Ricinus communis PE=1 SV=1	0.002	5.194	7	3	6	3	583		1.92
High	Q43744	Malate dehydrogenase, mitochondrial OS=Brassica napus GN=MDH PE=2 SV=1	0	13.754	19	3	5	3	341		15
High	Q9LV33	Beta-glucosidase 44 OS=Arabidopsis thaliana GN=BGLU44 PE=2 SV=1	0	15.33	7	6	84	3	512		90.93
High	Q9LXS7	Citrate synthase 1, peroxisomal OS=Arabidopsis thaliana GN=CSY1 PE=2 SV=1	0	11.416	7	3	19	3	480		42.06
High	Q9SIB9	Aconitate hydratase 2, mitochondrial OS=Arabidopsis thaliana GN=ACO2 PE=1 SV=2	0	21.16	11	8	34	3	990		57.06
High	Q9SIU0	NAD-dependent malic enzyme 1, mitochondrial OS=Arabidopsis thaliana GN=NAD-ME1 PE=1 SV=1	0	9.661	7	3	14	3	623		24.48
High	XP_020571636.1	uncharacterized protein LOC110018614 [Phalaenopsis equestris]	0	6.195	9	3	6	3	341	954.7
High	XP_020572712.1	isocitrate dehydrogenase [NAD] catalytic subunit 5, mitochondrial-like [Phalaenopsis equestris]	0	8.868	12	3	11	3	371	1801.11
High	XP_020575133.1	cytosolic isocitrate dehydrogenase [NADP] [Phalaenopsis equestris]	0	27.815	28	7	44	3	316	9027.38
High	XP_020576380.1	ricin B-like lectin R40G3 [Phalaenopsis equestris]	0	32.228	21	5	42	3	185	9239.84	8.86
High	XP_020577049.1	fructose-bisphosphate aldolase 1, cytoplasmic [Phalaenopsis equestris]	0	38.666	23	6	60	3	358	9208.34	66.27
High	XP_020577634.1	26S proteasome regulatory subunit 4 homolog B-like [Phalaenopsis equestris]	0	14.048	11	3	25	3	445	2741.5	35.98
High	XP_020577798.1	NADP-dependent malic enzyme [Phalaenopsis equestris]	0	37.893	20	6	41	3	592	8071.39	24.76
High	XP_020578051.1	probable cytosolic oligopeptidase A isoform X1 [Phalaenopsis equestris]	0	35.99	13	9	43	3	783	9512.29
High	XP_020578479.1	40S ribosomal protein S21 [Phalaenopsis equestris]	0	45.482	44	3	34	3	82	12820.9		Acetyl [N-Term]
High	XP_020579450.1	26S proteasome non-ATPase regulatory subunit 1 homolog A-like [Phalaenopsis equestris]	0	8.36	4	3	10	3	1000	1815.68
High	XP_020580840.1	KH domain-containing protein HEN4-like isoform X1 [Phalaenopsis equestris]	0	8.968	6	3	11	3	558	2119.47
High	XP_020581402.1	peroxiredoxin-2E-1, chloroplastic [Phalaenopsis equestris]	0	22.377	15	3	33	3	227	7960.65
High	XP_020581404.1	pyruvate dehydrogenase E1 component subunit beta, mitochondrial isoform X1 [Phalaenopsis equestris]	0	23.074	13	4	34	3	394	7934.23
High	XP_020581523.1	monodehydroascorbate reductase-like [Phalaenopsis equestris]	0	62.059	17	7	136	3	435	31500.9	63.1
High	XP_020581752.1	proteasome subunit beta type-1 [Phalaenopsis equestris]	0	9.809	14	3	20	3	221	3978.4
High	XP_020581856.1	phosphoserine aminotransferase 2, chloroplastic-like [Phalaenopsis equestris]	0	13.529	12	4	21	3	451	3495.72
High	XP_020582445.1	aldehyde dehydrogenase family 7 member B4 [Phalaenopsis equestris]	0	47.784	28	9	59	3	508	7460.91	69.91
High	XP_020583523.1	protein argonaute 4B-like [Phalaenopsis equestris]	0	10.233	3	3	10	3	907	1911.56
High	XP_020583525.1	LOW QUALITY PROTEIN: cell division cycle protein 48 homolog [Phalaenopsis equestris]	0	87.774	25	18	46	3	808	8860.5	25.78
High	XP_020584147.1	serpin-ZXA [Phalaenopsis equestris]	0	11.16	11	3	16	3	392	3109.21	2.96
High	XP_020584427.1	NHP2-like protein 1 [Phalaenopsis equestris]	0	10.691	58	3	13	3	127	290.58	62.32
High	XP_020584598.1	2-dehydro-3-deoxyphosphooctonate aldolase [Phalaenopsis equestris]	0	13.033	12	3	14	3	290	2743.42
High	XP_020584839.1	60S ribosomal protein L15-1 [Phalaenopsis equestris]	0	12.262	18	3	11	3	204	2909.9
High	XP_020584852.1	protein disulfide isomerase-like 1-4 [Phalaenopsis equestris]	0	18.857	5	3	12	3	575	4178.43
High	XP_020585288.1	superoxide dismutase [Mn], mitochondrial-like [Phalaenopsis equestris]	0	7.951	7	3	7	3	238	1092.56	0
High	XP_020586884.1	SKP1-like protein 1B [Phalaenopsis equestris]	0	10.202	24	3	6	3	164	1299.76
High	XP_020587213.1	proteasome subunit beta type-5-like isoform X1 [Phalaenopsis equestris]	0	10.046	15	3	15	3	321	2702.05	10.74
High	XP_020587836.1	elongation factor Tu, mitochondrial [Phalaenopsis equestris]	0	45.365	36	10	40	3	455	8730.45	15.51
High	XP_020587871.1	60S ribosomal protein L5-like [Phalaenopsis equestris]	0	22.578	11	4	28	3	304	5406.86	3.06
High	XP_020589631.1	40S ribosomal protein S4-like [Phalaenopsis equestris]	0	13.879	11	4	19	3	261	4185.17
High	XP_020590198.1	26S proteasome non-ATPase regulatory subunit 14 homolog [Phalaenopsis equestris]	0	13.616	16	3	16	3	308	3322.36	12.46
High	XP_020590602.1	pyrophosphate--fructose 6-phosphate 1-phosphotransferase subunit beta [Phalaenopsis equestris]	0	9.889	10	3	12	3	544	2382.06	0
High	XP_020592148.1	enoyl-CoA delta isomerase 2, peroxisomal-like [Phalaenopsis equestris]	0	10.305	14	3	8	3	250	1593.09
High	XP_020592175.1	LOW QUALITY PROTEIN: 70 kDa peptidyl-prolyl isomerase-like [Phalaenopsis equestris]	0	9.358	7	3	14	3	573	2162.79
High	XP_020592572.1	actin-7-like [Phalaenopsis equestris]	0	140.312	73	23	184	3	377	18952.6	471.37
High	XP_020593203.1	uncharacterized protein LOC110033527 [Phalaenopsis equestris]	0	25.491	21	4	33	3	140	8166.21
High	XP_020593213.1	glyceraldehyde-3-phosphate dehydrogenase GAPC2, cytosolic [Phalaenopsis equestris]	0	84.284	34	14	155	3	340	29266.7	53.61
High	XP_020593410.1	LOW QUALITY PROTEIN: ruBisCO large subunit-binding protein subunit alpha-like [Phalaenopsis equestris]	0	106.147	29	16	114	3	575	16756	263.64
High	XP_020595417.1	uncharacterized protein LOC110035522 [Phalaenopsis equestris]	0	10.061	7	3	11	3	610	2043.56
High	XP_020596342.1	60S ribosomal protein L7-2 [Phalaenopsis equestris]	0	10.171	18	3	16	3	244	2060.68	14.83
High	XP_020671736.1	2-oxoglutarate dehydrogenase, mitochondrial [Dendrobium catenatum]	0	70.293	20	13	79	3	1021	14559.5	50.01
High	XP_020672514.1	eukaryotic peptide chain release factor GTP-binding subunit ERF3A [Dendrobium catenatum]	0	15.749	10	3	12	3	540	2381.82	4.74
High	XP_020673044.1	monodehydroascorbate reductase 3, cytosolic [Dendrobium catenatum]	0	77.273	28	9	231	3	435	49108.4	155.36
High	XP_020673319.1	patellin-3 [Dendrobium catenatum]	0	8.003	5	3	3	3	602	626.57
High	XP_020674029.1	60S ribosomal protein L13a-4 [Dendrobium catenatum]	0	13.282	22	4	14	3	206	2802.13
High	XP_020674090.1	ATP-citrate synthase beta chain protein 1 [Dendrobium catenatum]	0	37.94	22	11	47	3	608	9871.91		Met-loss+Acetyl [N-Term]
High	XP_020674169.1	phosphoglucan, water dikinase, chloroplastic [Dendrobium catenatum]	0	18.777	4	3	28	3	1185	6361.49
High	XP_020675236.1	60S acidic ribosomal protein P2 isoform X1 [Dendrobium catenatum]	0	11.58	16	3	27	3	130	5513.19
High	XP_020675262.1	cysteine synthase [Dendrobium catenatum]	0	90.358	33	9	144	3	325	31019.7	108.78
High	XP_020676652.1	DEAD-box ATP-dependent RNA helicase 52B [Dendrobium catenatum]	0	12.309	9	4	14	3	644	2545.35	3.09
High	XP_020676952.1	NADP-dependent malic enzyme isoform X1 [Dendrobium catenatum]	0	37.451	15	9	56	3	603	10900
High	XP_020677011.1	tubulin beta chain [Dendrobium catenatum]	0	137.234	51	21	178	3	445	39471	37.81
High	XP_020678333.2	aldehyde dehydrogenase family 7 member B4 [Dendrobium catenatum]	0	43.586	26	9	54	3	508	8295.18	45.57
High	XP_020678522.1	erlin-2-B isoform X1 [Dendrobium catenatum]	0	7.467	9	3	12	3	373	2131.38
High	XP_020679823.1	puromycin-sensitive aminopeptidase isoform X1 [Dendrobium catenatum]	0	20.867	5	3	11	3	977	2783.32
High	XP_020680390.1	clathrin heavy chain 1 [Dendrobium catenatum]	0	67.464	15	17	79	3	1707	12668.3	53.66
High	XP_020682931.1	triosephosphate isomerase, cytosolic [Dendrobium catenatum]	0	59.964	43	10	108	3	253	14465.3	157.26
High	XP_020682933.1	heat shock cognate 70 kDa protein 2 [Dendrobium catenatum]	0	169.317	40	24	242	3	646	52700.6	193.86
High	XP_020683153.1	mitochondrial outer membrane porin-like [Dendrobium catenatum]	0	18.23	9	3	32	3	275	7071.41
High	XP_020683303.1	DEAD-box ATP-dependent RNA helicase 56 isoform X1 [Dendrobium catenatum]	0	14.132	11	3	15	3	473	2869.6	3.53
High	XP_020683796.1	NADP-dependent D-sorbitol-6-phosphate dehydrogenase [Dendrobium catenatum]	0	8.531	10	3	18	3	312	3288.72
High	XP_020683804.1	3-phosphoshikimate 1-carboxyvinyltransferase 2 [Dendrobium catenatum]	0	21.732	10	3	26	3	529	914.73	107.03
High	XP_020684849.1	60S ribosomal protein L12-like [Dendrobium catenatum]	0	12.968	23	3	20	3	166	4625.04
High	XP_020685658.1	trans-cinnamate 4-monooxygenase-like [Dendrobium catenatum]	0	7.357	7	3	4	3	505	515	0
High	XP_020687014.1	5-methyltetrahydropteroyltriglutamate--homocysteine methyltransferase 2 isoform X3 [Dendrobium catenatum]	0	112.976	31	18	125	3	766	22361	112.73	Acetyl [N-Term]
High	XP_020687168.2	adenosine kinase 2 [Dendrobium catenatum]	0	8.367	12	3	8	3	341	1213.11
High	XP_020687539.1	fumarylacetoacetase [Dendrobium catenatum]	0	20.089	14	3	20	3	425	3953.68	15.31
High	XP_020688662.1	lactoylglutathione lyase GLX1 [Dendrobium catenatum]	0	28.059	14	5	46	3	293	10888
High	XP_020688725.1	T-complex protein 1 subunit gamma [Dendrobium catenatum]	0	13.01	18	6	15	3	557	2749.82	4.8	Acetyl [N-Term]
High	XP_020688941.1	protein disulfide-isomerase-like [Dendrobium catenatum]	0	14.893	5	3	15	3	500	2998.97
High	XP_020690305.1	RNA-binding KH domain-containing protein PEPPER [Dendrobium catenatum]	0	13.714	10	5	21	3	452	3728.49
High	XP_020690474.2	phospholipase D alpha 1 [Dendrobium catenatum]	0	121.316	23	19	156	3	811	36391.7	7.82
High	XP_020690773.1	aspartate aminotransferase, chloroplastic [Dendrobium catenatum]	0	6.194	7	3	3	3	456	464.67
High	XP_020690879.1	ras-related protein RIC1 isoform X1 [Dendrobium catenatum]	0	12.155	38	5	18	3	206	2502.35	0
High	XP_020690881.1	serine hydroxymethyltransferase 4-like [Dendrobium catenatum]	0	42.071	24	8	32	3	530	6354.27	24.56
High	XP_020691195.1	stromal 70 kDa heat shock-related protein, chloroplastic [Dendrobium catenatum]	0	69.565	22	14	103	3	702	18536.2	75.91
High	XP_020692633.1	eukaryotic translation initiation factor [Dendrobium catenatum]	0	8.774	5	3	3	3	794	693.57		Acetyl [N-Term]
High	XP_020693084.1	40S ribosomal protein S28 [Dendrobium catenatum]	0	15.428	54	4	15	3	65	2405.25
High	XP_020693643.1	bifunctional nitrilase/nitrile hydratase NIT4 [Dendrobium catenatum]	0	8.498	10	3	14	3	351	2401.56
High	XP_020695389.1	triosephosphate isomerase, cytosolic [Dendrobium catenatum]	0	50.937	34	10	113	3	253	14132.4	105.16
High	XP_020696320.1	glyceraldehyde-3-phosphate dehydrogenase 2, cytosolic isoform X1 [Dendrobium catenatum]	0	77.081	43	15	162	3	340	28073.4	100.06
High	XP_020696866.1	thioredoxin reductase NTRB-like [Dendrobium catenatum]	0	9.318	15	3	15	3	377	893.48	24.84
High	XP_020698350.1	probable linoleate 9S-lipoxygenase 5 [Dendrobium catenatum]	0	23.749	7	5	40	3	860	7935.41
High	XP_020698547.1	actin-7 [Dendrobium catenatum]	0	134.329	67	22	169	3	377	15014.4	433.96
High	XP_020699595.1	importin subunit alpha-2 [Dendrobium catenatum]	0	39.78	12	4	31	3	530	8647.69
High	XP_020701218.1	T-complex protein 1 subunit beta isoform X1 [Dendrobium catenatum]	0	37.709	29	10	42	3	527	7422.41	23.08
High	XP_020701400.1	chorismate synthase, chloroplastic [Dendrobium catenatum]	0	10.974	9	3	11	3	447	2730.44
High	XP_020701888.1	uncharacterized protein LOC110113586 [Dendrobium catenatum]	0	7.549	17	4	20	3	283	3133.75	8.98
High	XP_020702295.1	60S ribosomal protein L13-1-like [Dendrobium catenatum]	0	13.405	19	3	20	3	207	4332.08
High	XP_020702550.1	heat shock cognate 70 kDa protein [Dendrobium catenatum]	0	96.359	21	12	126	3	644	30033.7	65.05
High	XP_020702866.1	luminal-binding protein 4 [Dendrobium catenatum]	0	97.267	26	16	133	3	663	30180.8	38.71
High	XP_020703251.1	fructose-bisphosphate aldolase 1, cytoplasmic-like [Dendrobium catenatum]	0	52.572	18	6	89	3	358	10110.9	172.92
High	XP_020703503.1	aldehyde dehydrogenase family 2 member B7, mitochondrial [Dendrobium catenatum]	0	12.341	8	3	12	3	545	1362.05	18.08
High	XP_020703897.1	NAD(P)H dehydrogenase (quinone) FQR1 [Dendrobium catenatum]	0	14.54	9	3	17	3	203	4244.83		Acetyl [N-Term]; Met-loss+Acetyl [N-Term]
High	XP_020704336.1	S-adenosylmethionine synthase 5 [Dendrobium catenatum]	0	41.87	41	10	48	3	394	5386.44	53.87
High	XP_020704354.1	malate dehydrogenase, glyoxysomal [Dendrobium catenatum]	0	14.966	10	3	30	3	357	5444.94
High	XP_020704402.1	glycine-rich RNA-binding protein 2 [Dendrobium catenatum]	0	12.042	17	3	23	3	166	4365.18	12.46
High	XP_020704442.1	phosphoglucomutase, cytoplasmic [Dendrobium catenatum]	0	25.009	15	8	47	3	583	7366.54	19.93
High	XP_020704680.1	26S proteasome non-ATPase regulatory subunit 12 homolog A isoform X1 [Dendrobium catenatum]	0	10.228	11	3	7	3	440	1131.82	5.79
High	XP_020704794.1	transketolase, chloroplastic [Dendrobium catenatum]	0	21.95	10	5	36	3	740	5629.51	20.94
High	XP_028548865.1	uncharacterized protein LOC110098281 isoform X1 [Dendrobium catenatum]	0	15.889	12	3	17	3	328	3642.37
High	XP_028549797.1	60S ribosomal protein L9 [Dendrobium catenatum]	0	12.172	32	4	24	3	190	2431.71	25.17
High	XP_028550487.1	ubiquitin carboxyl-terminal hydrolase 14 [Dendrobium catenatum]	0	9.088	4	3	8	3	802	1440.03
High	XP_028550916.1	mitochondrial import inner membrane translocase subunit TIM8 isoform X1 [Dendrobium catenatum]	0	13.292	35	3	8	3	74	1498.95
High	XP_028550935.1	galactokinase [Dendrobium catenatum]	0	13.268	9	3	17	3	497	3261.35	13.27
High	XP_028551966.1	isovaleryl-CoA dehydrogenase, mitochondrial [Dendrobium catenatum]	0	7.392	15	3	5	3	408	223.66	8.75
High	XP_028552026.1	glycine-rich RNA-binding protein RZ1A [Dendrobium catenatum]	0	9.127	17	3	11	3	206	2393.11	3.52
High	XP_028552334.1	LOW QUALITY PROTEIN: probable acetyl-CoA acetyltransferase, cytosolic 2 [Dendrobium catenatum]	0	9.889	8	3	25	3	405	2864.18	34.06
High	XP_028552346.1	glutathione reductase, chloroplastic [Dendrobium catenatum]	0	7.761	13	3	10	3	389	362.45	23.38
High	XP_028552617.1	chaperone protein ClpB3, chloroplastic [Dendrobium catenatum]	0	27.506	9	6	23	3	959	4040.09	6.83
High	XP_028554362.1	heat shock protein 90-6, mitochondrial [Dendrobium catenatum]	0	42	12	7	50	3	803	10273	25.75
High	XP_028555290.1	leucine aminopeptidase 2, chloroplastic [Dendrobium catenatum]	0	31.703	19	7	45	3	429	6717.02	35.95
High	XP_028555607.1	soluble inorganic pyrophosphatase 1 [Dendrobium catenatum]	0	10.899	27	3	13	3	270	3484.55	2.69
High	XP_028555691.1	L-ascorbate peroxidase, cytosolic isoform X1 [Dendrobium catenatum]	0	24.788	16	3	33	3	249	8702.57
High	XP_028556727.1	ATP synthase subunit d, mitochondrial isoform X1 [Dendrobium catenatum]	0	20.658	21	4	29	3	199	5745.08
High	A4QJI4	ATP synthase subunit alpha, chloroplastic OS=Aethionema grandiflora GN=atpA PE=3 SV=1	0	6.246	9	3	3	2	507		3.38
High	B5LZ79	Defensin-like protein OS=Gymnadenia conopsea PE=1 SV=1	0.002	5.186	11	2	12	2	75		12.46
High	O04450	T-complex protein 1 subunit epsilon OS=Arabidopsis thaliana GN=At1g24510 PE=2 SV=1	0	5.56	5	3	7	2	535		11.94
High	O04883	Phospholipase D alpha 1 OS=Pimpinella brachycarpa GN=PLD1 PE=2 SV=1	0	24.052	9	8	41	2	808		62.85
High	O23755	Elongation factor 2 OS=Beta vulgaris PE=2 SV=1	0	10.581	3	2	24	2	843		35.13
High	O23813	Sulfite reductase [ferredoxin], chloroplastic OS=Zea mays GN=SIR PE=1 SV=1	0.002	2.992	3	2	5	2	635		3.41
High	O24581	Luminal-binding protein 3 OS=Zea mays GN=BIPE3 PE=2 SV=1	0	15.838	5	3	20	2	663		52.77
High	O48558	60S ribosomal protein L30 OS=Zea mays GN=RPL30 PE=3 SV=1	0	6.881	11	2	11	2	112		13.37
High	O80433	Citrate synthase, mitochondrial OS=Daucus carota GN=CS PE=2 SV=1	0	7.001	11	3	4	2	472		4.56
High	O82627	Granule-bound starch synthase 1, chloroplastic/amyloplastic OS=Antirrhinum majus GN=WAXY PE=2 SV=1	0	12.443	3	3	27	2	608		49.58
High	P04796	Glyceraldehyde-3-phosphate dehydrogenase, cytosolic OS=Sinapis alba GN=GAPC PE=2 SV=2	0	78.649	17	8	95	2	338		208.15
High	P0C521	ATP synthase subunit alpha, mitochondrial OS=Oryza sativa subsp. indica GN=ATPA PE=2 SV=1	0	57.892	28	14	87	2	509		185.83
High	P13645	SWISS-PROT:P13645 Tax_Id=9606 Gene_Symbol=KRT10 Keratin, type I cytoskeletal 10	0	9.601	5	2	4	2	593	1003.73
High	P17878	Glyceraldehyde-3-phosphate dehydrogenase, cytosolic OS=Mesembryanthemum crystallinum GN=GAPC PE=2 SV=1	0	87.892	21	7	112	2	337		441.55
High	P25856	Glyceraldehyde-3-phosphate dehydrogenase A, chloroplastic OS=Arabidopsis thaliana GN=GAPA PE=1 SV=3	0	10.121	7	2	6	2	396		16.28
High	P26204	Non-cyanogenic beta-glucosidase OS=Trifolium repens PE=1 SV=1	0	8.582	3	2	14	2	493		15.64
High	P26360	ATP synthase subunit gamma, mitochondrial OS=Ipomoea batatas GN=ATPC PE=1 SV=2	0.002	3.604	10	2	8	2	326		10.33
High	P28734	Aspartate aminotransferase, cytoplasmic OS=Daucus carota PE=2 SV=1	0	5.682	7	3	19	2	405		22.01
High	P28769	T-complex protein 1 subunit alpha OS=Arabidopsis thaliana GN=CCT1 PE=2 SV=1	0	9.875	7	3	11	2	545		15.48
High	P29521	Elongation factor 1-alpha OS=Daucus carota PE=1 SV=1	0	18.927	18	8	22	2	449		38.96
High	P31168	Dehydrin COR47 OS=Arabidopsis thaliana GN=COR47 PE=1 SV=2	0	6.954	3	2	26	2	265		24.01
High	P31405	V-type proton ATPase catalytic subunit A OS=Gossypium hirsutum GN=CVA69.24 PE=2 SV=1	0	17.9	16	7	24	2	623		33.31
High	P31691	ADP,ATP carrier protein, mitochondrial OS=Oryza sativa subsp. japonica GN=Os02g0718900 PE=2 SV=1	0	13.651	16	7	17	2	382		25.47
High	P32112	Adenosylhomocysteinase OS=Triticum aestivum GN=SAHH PE=2 SV=1	0	33.487	11	6	51	2	485		124.44
High	P33627	Tubulin alpha-6 chain OS=Zea mays GN=TUBA6 PE=2 SV=1	0	11.808	17	5	10	2	450		5.32
High	P34788	40S ribosomal protein S18 OS=Arabidopsis thaliana GN=RPS18A PE=1 SV=1	0	9.819	28	3	9	2	152		11.31	Met-loss+Acetyl [N-Term]
High	P34791	Peptidyl-prolyl cis-trans isomerase CYP20-3, chloroplastic OS=Arabidopsis thaliana GN=CYP20-3 PE=1 SV=1	0	5.686	15	2	5	2	260		8.12
High	P34823	Elongation factor 1-alpha OS=Daucus carota PE=2 SV=1	0	41.862	17	7	38	2	447		107.56
High	P35908	SWISS-PROT:P35908 Tax_Id=9606 Gene_Symbol=KRT2 Keratin, type II cytoskeletal 2 epidermal	0	10.801	6	3	8	2	645	1681.43
High	P36181	Heat shock cognate protein 80 OS=Solanum lycopersicum GN=HSC80 PE=2 SV=1	0	18.079	13	8	36	2	699		29.53
High	P36182	Heat shock protein 82 (Fragment) OS=Nicotiana tabacum GN=HSP82 PE=2 SV=1	0	8.978	6	3	5	2	499		0
High	P37225	NAD-dependent malic enzyme 59 kDa isoform, mitochondrial OS=Solanum tuberosum PE=1 SV=1	0	6.334	5	2	6	2	601		10.49
High	P46257	Fructose-bisphosphate aldolase, cytoplasmic isozyme 2 OS=Pisum sativum PE=3 SV=1	0	35.442	11	3	33	2	359		152.06
High	P47921	Nucleoside diphosphate kinase (Fragment) OS=Solanum lycopersicum PE=2 SV=1	0	7.915	10	2	19	2	144		32.37
High	P48534	L-ascorbate peroxidase, cytosolic OS=Pisum sativum GN=APX1 PE=1 SV=2	0	21.937	22	2	16	2	250		49.01
High	P53536	Alpha-1,4 glucan phosphorylase L isozyme, chloroplastic/amyloplastic OS=Vicia faba GN=PHO1 PE=2 SV=2	0	29.138	9	8	25	2	1003		51.54
High	P54776	26S protease regulatory subunit 6A homolog OS=Solanum lycopersicum GN=TBP1 PE=2 SV=1	0	10.528	13	3	18	2	423		38.69
High	P55242	Glucose-1-phosphate adenylyltransferase large subunit 2, chloroplastic/amyloplastic OS=Solanum tuberosum GN=AGPS2 PE=2 SV=1	0.002	4.789	8	2	5	2	519		3
High	P93447	Elongation factor 1-delta OS=Pimpinella brachycarpa PE=2 SV=3	0	8.499	4	2	16	2	226		23.72
High	P93554	Nucleoside diphosphate kinase 1 OS=Saccharum officinarum GN=NDPK1 PE=1 SV=1	0	13.764	24	2	10	2	149		34.95
High	P93805	Phosphoglucomutase, cytoplasmic 2 OS=Zea mays PE=2 SV=2	0	40.588	10	5	28	2	583		111.53
High	P98012	Cytochrome c oxidase subunit 2 OS=Beta vulgaris GN=COX2 PE=2 SV=1	0	7.816	9	2	14	2	260		29.97
High	Q06197	Isocitrate dehydrogenase [NADP] OS=Glycine max GN=IDH1 PE=2 SV=2	0	11.972	10	4	20	2	413		40.88
High	Q07511	Formate dehydrogenase, mitochondrial OS=Solanum tuberosum GN=FDH1 PE=1 SV=2	0	14.763	11	5	36	2	381		59.49
High	Q08480	Adenylate kinase B OS=Oryza sativa subsp. japonica GN=ADK-B PE=2 SV=1	0	5.727	14	2	9	2	243		16.35
High	Q09054	Glyceraldehyde-3-phosphate dehydrogenase 2, cytosolic OS=Zea mays GN=GAPC2 PE=2 SV=1	0	30.559	22	8	78	2	337		65.89
High	Q0DWH1	Alcohol dehydrogenase class-3 OS=Oryza sativa subsp. japonica GN=Os02g0815500 PE=2 SV=1	0	7.335	9	3	12	2	381		12.05
High	Q0JGY1	60S ribosomal protein L5-1 OS=Oryza sativa subsp. japonica GN=RPL5A PE=2 SV=1	0	10.01	14	3	16	2	304		31.06
High	Q39161	Ferredoxin--nitrite reductase, chloroplastic OS=Arabidopsis thaliana GN=NIR1 PE=1 SV=1	0	6.219	6	2	11	2	586		11.23
High	Q40778	Allene oxide synthase OS=Parthenium argentatum GN=CYP74A2 PE=1 SV=2	0	6.117	3	2	8	2	473		7.09
High	Q40977	Monodehydroascorbate reductase OS=Pisum sativum PE=1 SV=1	0	16.13	7	2	27	2	433		62.93
High	Q42406	Peptidyl-prolyl cis-trans isomerase CYP18-4 OS=Arabidopsis thaliana GN=CYP18-4 PE=1 SV=1	0	7.684	15	2	2	2	172		2.81
High	Q42699	5-methyltetrahydropteroyltriglutamate--homocysteine methyltransferase OS=Catharanthus roseus GN=METE PE=2 SV=1	0	11.569	9	4	12	2	765		26.08
High	Q42908	2,3-bisphosphoglycerate-independent phosphoglycerate mutase OS=Mesembryanthemum crystallinum GN=PGM1 PE=2 SV=1	0	33.719	9	2	25	2	559		91.46
High	Q42962	Phosphoglycerate kinase, cytosolic OS=Nicotiana tabacum PE=2 SV=1	0	8.631	13	4	11	2	401		10.67
High	Q43191	Probable linoleate 9S-lipoxygenase 5 OS=Solanum tuberosum GN=LOX1.5 PE=2 SV=1	0	9.251	4	3	10	2	862		23.57
High	Q43321	Enolase OS=Alnus glutinosa GN=PGH1 PE=2 SV=1	0	38.524	24	9	73	2	440		76.69
High	Q7SIC9	Transketolase, chloroplastic OS=Zea mays PE=1 SV=1	0	15.295	6	2	2	2	675		9.56
High	Q9C5A9	ATP synthase subunit beta-3, mitochondrial OS=Arabidopsis thaliana GN=At5g08680 PE=2 SV=1	0	12.892	19	7	9	2	559		2.41
High	Q9FT52	ATP synthase subunit d, mitochondrial OS=Arabidopsis thaliana GN=At3g52300 PE=1 SV=3	0	17.776	18	2	25	2	168		86.37
High	Q9FUZ1	S-adenosylmethionine synthase 2 OS=Brassica juncea GN=MSAMS2 PE=2 SV=1	0	9.672	15	3	3	2	393		4.57
High	Q9LD57	Phosphoglycerate kinase 1, chloroplastic OS=Arabidopsis thaliana GN=PGK1 PE=1 SV=1	0	14.202	19	5	7	2	481		16.46
High	Q9LDV4	Alanine aminotransferase 2, mitochondrial OS=Arabidopsis thaliana GN=ALAAT2 PE=2 SV=1	0	6.491	7	2	12	2	540		34.31
High	Q9LF37	Chaperone protein ClpB3, chloroplastic OS=Arabidopsis thaliana GN=CLPB3 PE=1 SV=1	0	6.145	4	3	5	2	968		3.14
High	Q9LK36	Adenosylhomocysteinase 2 OS=Arabidopsis thaliana GN=SAHH2 PE=1 SV=1	0	11.982	8	4	18	2	485		25.06
High	Q9M5M1	40S ribosomal protein S11 OS=Euphorbia esula GN=RPS11 PE=2 SV=1	0.002	4.947	18	2	2	2	159		2.11
High	Q9SCY0	Phosphoglucomutase, chloroplastic OS=Arabidopsis thaliana GN=PGMP PE=1 SV=2	0	13.232	9	5	19	2	623		15.85
High	Q9SF85	Adenosine kinase 1 OS=Arabidopsis thaliana GN=ADK1 PE=1 SV=1	0	7.645	11	2	11	2	344		23.37
High	Q9SKQ0	Peptidyl-prolyl cis-trans isomerase CYP19-2 OS=Arabidopsis thaliana GN=CYP19-2 PE=1 SV=1	0	6.062	16	3	25	2	174		1.83
High	Q9SM59	Phosphoglucomutase, chloroplastic OS=Pisum sativum GN=PGMP PE=2 SV=1	0	11.868	7	5	22	2	626		24.58
High	Q9SP37	Adenosylhomocysteinase OS=Lupinus luteus GN=SAHH PE=1 SV=1	0	15.059	6	4	20	2	485		37.24
High	Q9XEA6	Cysteine synthase OS=Oryza sativa subsp. japonica GN=RCS1 PE=2 SV=2	0	6.656	9	3	3	2	321		7.96
High	Q9ZPI5	Peroxisomal fatty acid beta-oxidation multifunctional protein MFP2 OS=Arabidopsis thaliana GN=MFP2 PE=1 SV=1	0.002	5.102	3	2	6	2	725		4.15
High	XP_020571478.1	26S protease regulatory subunit 8 homolog A-like [Phalaenopsis equestris]	0	10.186	12	3	17	2	429	1972.79	16.15
High	XP_020571683.1	ras-related protein RABE1c isoform X1 [Phalaenopsis equestris]	0	22.223	22	4	23	2	245	4698.35
High	XP_020571691.1	histone H2A [Phalaenopsis equestris]	0	25.372	34	3	36	2	151	2049.53	122.8
High	XP_020572270.1	40S ribosomal protein S8 [Phalaenopsis equestris]	0	22.119	20	4	36	2	224	8604.78	0
High	XP_020573034.1	proteasome subunit beta type-3 [Phalaenopsis equestris]	0	6.745	15	2	9	2	204	1713.96		Acetyl [N-Term]
High	XP_020573932.1	elongation factor 1-gamma 2-like [Phalaenopsis equestris]	0	16.416	15	5	30	2	429	4610.07
High	XP_020573937.1	ATP-dependent Clp protease ATP-binding subunit CLPT1, chloroplastic-like [Phalaenopsis equestris]	0	9.354	12	2	8	2	242	1809.77
High	XP_020574369.1	mitochondrial import inner membrane translocase subunit Tim9 [Phalaenopsis equestris]	0.002	4.942	19	2	5	2	93	790.42
High	XP_020574653.1	60S ribosomal protein L37a [Phalaenopsis equestris]	0	7.978	26	2	11	2	92	2434.94
High	XP_020575202.1	T-complex protein 1 subunit alpha [Phalaenopsis equestris]	0	39.936	22	10	44	2	545	8669.98
High	XP_020575953.1	heat shock 70 kDa protein, mitochondrial-like [Phalaenopsis equestris]	0	71.103	22	10	63	2	672	10353.4	71.2
High	XP_020575976.1	26S protease regulatory subunit 6A homolog [Phalaenopsis equestris]	0	17.456	14	4	20	2	427	4329.18
High	XP_020575992.1	LOW QUALITY PROTEIN: 40S ribosomal protein S19-1-like [Phalaenopsis equestris]	0	19.963	27	3	19	2	150	4993.32
High	XP_020576223.1	glutamine synthetase nodule isozyme-like [Phalaenopsis equestris]	0	8.895	15	2	15	2	356		41.82
High	XP_020576228.1	uncharacterized protein LOC110021873 [Phalaenopsis equestris]	0	7.737	8	2	10	2	146	2423.35		Met-loss+Acetyl [N-Term]; Acetyl [N-Term]
High	XP_020576266.1	sm-like protein LSM5 [Phalaenopsis equestris]	0.002	5.313	18	2	2	2	87	437.49		Met-loss+Acetyl [N-Term]; Acetyl [N-Term]
High	XP_020576401.1	D-amino-acid transaminase, chloroplastic-like [Phalaenopsis equestris]	0	13.909	9	2	16	2	351	724.07	74.88
High	XP_020576846.1	V-type proton ATPase subunit E-like [Phalaenopsis equestris]	0	9.87	20	4	9	2	228	759.19	15.45	Acetyl [N-Term]
High	XP_020576957.1	probable fructokinase-1 [Phalaenopsis equestris]	0	20.604	13	5	33	2	328	6924.32
High	XP_020577119.1	luminal-binding protein 2 [Phalaenopsis equestris]	0	110.423	24	15	158	2	667	32276.7	129.73
High	XP_020577282.1	WD-40 repeat-containing protein MSI4 [Phalaenopsis equestris]	0	6.279	9	2	5	2	468	699.72	2.15
High	XP_020577573.1	L-ascorbate oxidase homolog [Phalaenopsis equestris]	0	6.432	5	2	5	2	542	875.41
High	XP_020577582.1	probable ATP synthase 24 kDa subunit, mitochondrial [Phalaenopsis equestris]	0	7.618	6	2	8	2	243	1159.55
High	XP_020577701.1	importin subunit beta-1 [Phalaenopsis equestris]	0.002	5.369	2	2	4	2	872	733.15
High	XP_020578159.1	5-methyltetrahydropteroyltriglutamate--homocysteine methyltransferase 2-like isoform X3 [Phalaenopsis equestris]	0	133.549	31	19	137	2	766	26610.3	117.76	Acetyl [N-Term]
High	XP_020578403.1	dolichyl-diphosphooligosaccharide--protein glycosyltransferase 48 kDa subunit isoform X1 [Phalaenopsis equestris]	0	8.361	7	2	4	2	446	743.86
High	XP_020578926.1	60S ribosomal protein L24-like [Phalaenopsis equestris]	0	12.753	8	2	18	2	162	3902.12
High	XP_020578939.1	transcription factor Pur-alpha 1-like isoform X1 [Phalaenopsis equestris]	0	5.795	8	2	10	2	282	1765.64
High	XP_020578967.1	alcohol dehydrogenase class-3 [Phalaenopsis equestris]	0	11.901	17	3	27	2	379	425.63	66.27
High	XP_020579006.1	enoyl-[acyl-carrier-protein] reductase [NADH] 1, chloroplastic [Phalaenopsis equestris]	0	19.772	16	4	20	2	383	3819.82	23.75
High	XP_020579389.1	LOW QUALITY PROTEIN: dihydrolipoyllysine-residue succinyltransferase component of 2-oxoglutarate dehydrogenase complex 2, mitochondrial-like [Phalaenopsis equestris]	0	6.243	12	2	12	2	504		37.71
High	XP_020579616.1	glutelin type-A 1-like [Phalaenopsis equestris]	0	7.926	10	2	9	2	357	1750.84	6.05
High	XP_020579782.1	LOW QUALITY PROTEIN: alpha-1,4 glucan phosphorylase L isozyme, chloroplastic/amyloplastic-like [Phalaenopsis equestris]	0	46.409	6	7	56	2	979	9069.54	66.51
High	XP_020580260.1	probable linoleate 9S-lipoxygenase 3 [Phalaenopsis equestris]	0	44.039	4	3	59	2	524	17818.7
High	XP_020580702.1	LOW QUALITY PROTEIN: heat shock cognate 70 kDa protein 2-like [Phalaenopsis equestris]	0	228.352	53	31	311	2	653	68191.7	245.26	Met-loss+Acetyl [N-Term]
High	XP_020581066.1	probable mannose-1-phosphate guanylyltransferase 1 [Phalaenopsis equestris]	0.002	5.301	4	2	4	2	361	753.76
High	XP_020581485.1	histone deacetylase HDT1-like isoform X2 [Phalaenopsis equestris]	0	10.31	7	2	18	2	351	4702.3		Acetyl [N-Term]
High	XP_020581657.1	protein TIC110, chloroplastic isoform X1 [Phalaenopsis equestris]	0	13.373	4	3	21	2	1054	4186.33
High	XP_020581987.1	LOW QUALITY PROTEIN: endoplasmin homolog [Phalaenopsis equestris]	0	52.656	12	8	68	2	815	15904.3	18.65
High	XP_020582053.1	DNA-binding protein MNB1B-like [Phalaenopsis equestris]	0	23.206	10	2	26	2	151	7737.47
High	XP_020582085.1	nucleolin-like [Phalaenopsis equestris]	0	7.913	3	2	11	2	800	2014.46
High	XP_020582560.1	diaminopimelate decarboxylase 1, chloroplastic-like [Phalaenopsis equestris]	0	5.482	4	2	5	2	490	868.95
High	XP_020582662.1	serine/threonine-protein phosphatase PP2A catalytic subunit isoform X2 [Phalaenopsis equestris]	0.002	4.44	9	2	3	2	313	475.62
High	XP_020582781.1	proteasome subunit beta type-6 [Phalaenopsis equestris]	0	16.939	21	4	15	2	243	3109.45
High	XP_020582878.1	eukaryotic peptide chain release factor subunit 1-3 [Phalaenopsis equestris]	0	6.816	7	2	14	2	436	2272.43
High	XP_020582994.1	2-oxoglutarate dehydrogenase, mitochondrial-like [Phalaenopsis equestris]	0	56.907	18	12	68	2	1021	13843.1	9.11
High	XP_020583211.1	zinc finger CCCH domain-containing protein 31-like [Phalaenopsis equestris]	0	8.798	8	2	11	2	316	2738.04
High	XP_020583272.1	non-specific lipid-transfer protein-like 1 [Phalaenopsis equestris]	0	7.434	14	2	8	2	125	1650.15
High	XP_020583292.1	probable N-acetyl-gamma-glutamyl-phosphate reductase, chloroplastic, partial [Phalaenopsis equestris]	0	5.719	5	2	9	2	448	1781.13
High	XP_020583718.1	nucleosome assembly protein 1;4-like [Phalaenopsis equestris]	0	13.653	11	3	23	2	374	4622.66
High	XP_020583962.1	beta-ureidopropionase [Phalaenopsis equestris]	0	5.481	8	2	2	2	422	361.79
High	XP_020584369.1	peptidyl-prolyl cis-trans isomerase [Phalaenopsis equestris]	0	12.746	23	3	23	2	173	1328.94	41.33
High	XP_020584439.1	omega-amidase, chloroplastic [Phalaenopsis equestris]	0	5.814	10	2	8	2	363	1543.43	4.22
High	XP_020584469.1	2-alkenal reductase (NADP(+)-dependent)-like [Phalaenopsis equestris]	0	7.098	7	2	9	2	345	1982.99
High	XP_020584502.1	glutathione S-transferase 2-like isoform X2 [Phalaenopsis equestris]	0	6.417	10	2	15	2	219	2755.06
High	XP_020584530.1	glutamine synthetase cytosolic isozyme 1-1 [Phalaenopsis equestris]	0	9.473	6	3	10	2	357	1302.96	7.72
High	XP_020584652.1	succinate dehydrogenase [ubiquinone] iron-sulfur subunit 1, mitochondrial-like [Phalaenopsis equestris]	0	7.969	7	2	9	2	281	2629.97
High	XP_020584701.1	succinate dehydrogenase [ubiquinone] flavoprotein subunit, mitochondrial [Phalaenopsis equestris]	0	21.977	5	3	21	2	630	4872.72
High	XP_020584747.1	cytochrome c-like [Phalaenopsis equestris]	0	7.169	17	2	19	2	113	4033.17
High	XP_020584803.1	glutathione reductase, cytosolic [Phalaenopsis equestris]	0	10.367	8	3	19	2	502	1668.25	42.31
High	XP_020585828.1	gamma carbonic anhydrase 1, mitochondrial-like [Phalaenopsis equestris]	0	5.899	10	2	6	2	272	1015.31
High	XP_020585829.1	60S ribosomal protein L19-3-like [Phalaenopsis equestris]	0.002	4.919	9	2	3	2	211	530.92
High	XP_020586075.1	probable LL-diaminopimelate aminotransferase, chloroplastic [Phalaenopsis equestris]	0.002	4.321	5	2	6	2	455	952.24
High	XP_020586265.1	glycine--tRNA ligase, mitochondrial 1-like [Phalaenopsis equestris]	0	14.677	7	4	17	2	736	3463.77
High	XP_020586392.1	ankyrin repeat domain-containing protein 2A-like [Phalaenopsis equestris]	0	7.039	8	2	7	2	338	1311.76
High	XP_020586649.1	ribulose-phosphate 3-epimerase, chloroplastic isoform X1 [Phalaenopsis equestris]	0	8.379	12	2	9	2	290	1535.77	0
High	XP_020587168.1	quinone oxidoreductase PIG3 [Phalaenopsis equestris]	0	7.174	6	2	17	2	325	3239.05
High	XP_020587352.1	sucrose synthase 2 [Phalaenopsis equestris]	0	105.743	28	20	124	2	816	18865.8	143.84
High	XP_020587412.1	ATP-dependent Clp protease proteolytic subunit 4, chloroplastic [Phalaenopsis equestris]	0	7.914	11	2	14	2	316	1631.49	14.58
High	XP_020587661.1	chaperone protein ClpC1, chloroplastic [Phalaenopsis equestris]	0	54.874	21	14	63	2	921	11475.4	17.14
High	XP_020587786.1	LOW QUALITY PROTEIN: long chain base biosynthesis protein 2d-like [Phalaenopsis equestris]	0	7.239	6	2	3	2	490	687.42
High	XP_020587845.1	protein DJ-1 homolog B [Phalaenopsis equestris]	0	8.637	5	2	16	2	424	3138.5
High	XP_020589067.1	2-isopropylmalate synthase A-like [Phalaenopsis equestris]	0	10.776	5	2	4	2	561	957.02
High	XP_020589082.1	60S ribosomal protein L3-like [Phalaenopsis equestris]	0	19.19	9	4	25	2	389	5763.18
High	XP_020589172.1	ubiquitin-conjugating enzyme E2 10 [Phalaenopsis equestris]	0	5.666	38	2	3	2	148		12.29
High	XP_020589275.1	methylmalonate-semialdehyde dehydrogenase [acylating], mitochondrial isoform X1 [Phalaenopsis equestris]	0	9.267	5	2	7	2	551	1581.57
High	XP_020589525.1	small ubiquitin-related modifier 1 [Phalaenopsis equestris]	0	5.706	39	2	7	2	94	190.51	16.4
High	XP_020589637.1	pathogenesis-related protein 1-like [Phalaenopsis equestris]	0	24.561	17	4	36	2	157	8673.98		Met-loss+Acetyl [N-Term]; Acetyl [N-Term]
High	XP_020589761.1	malate dehydrogenase [Phalaenopsis equestris]	0	44.192	24	8	84	2	332	15240.4	68.85
High	XP_020589907.1	nuclear transport factor 2-like [Phalaenopsis equestris]	0	19.161	22	2	29	2	123	7033.95
High	XP_020590288.1	glycine dehydrogenase (decarboxylating), mitochondrial-like [Phalaenopsis equestris]	0.002	5.418	3	2	2	2	1024	322.17
High	XP_020590374.1	bifunctional aspartokinase/homoserine dehydrogenase 1, chloroplastic-like [Phalaenopsis equestris]	0	9.345	3	2	5	2	924	1281.26
High	XP_020590426.1	superoxide dismutase [Cu-Zn] 4A [Phalaenopsis equestris]	0	22.005	13	2	27	2	152	5265.27	0
High	XP_020590849.1	probable linoleate 9S-lipoxygenase 5 [Phalaenopsis equestris]	0	11.49	3	3	31	2	738	6393.27
High	XP_020591344.1	citrate synthase, mitochondrial [Phalaenopsis equestris]	0	31.23	26	8	43	2	471	6071.51	54.99
High	XP_020591395.1	stomatin-like protein 2, mitochondrial isoform X1 [Phalaenopsis equestris]	0.002	3.991	6	2	2	2	420	307.04
High	XP_020591927.1	proliferating cell nuclear antigen [Phalaenopsis equestris]	0.002	4.796	17	2	10	2	264		23.58
High	XP_020592152.1	histone H1-like [Phalaenopsis equestris]	0	7.199	7	2	17	2	227	3292.29
High	XP_020592283.1	eukaryotic translation initiation factor 5-like [Phalaenopsis equestris]	0	8.945	4	2	4	2	440	1150.54		Acetyl [N-Term]; Met-loss+Acetyl [N-Term]
High	XP_020592636.1	RNA-binding KH domain-containing protein PEPPER-like isoform X1 [Phalaenopsis equestris]	0	12.798	8	4	15	2	464	3006.24
High	XP_020592644.1	uncharacterized protein LOC110033114 [Phalaenopsis equestris]	0	6.252	3	2	10	2	1316	1997.78	3.24
High	XP_020592770.1	multiple organellar RNA editing factor 8, chloroplastic/mitochondrial-like isoform X1 [Phalaenopsis equestris]	0	9.967	5	2	15	2	537	3149.27
High	XP_020593040.1	LOW QUALITY PROTEIN: 40S ribosomal protein SA-like [Phalaenopsis equestris]	0	19.946	22	4	25	2	309	6256.21	7.21
High	XP_020593195.1	uncharacterized protein LOC110033523 [Phalaenopsis equestris]	0	8.285	6	3	15	2	333	2398.48
High	XP_020593223.1	phytepsin-like isoform X1 [Phalaenopsis equestris]	0	6.297	6	2	7	2	511	1019.95	0
High	XP_020593403.1	2-methylene-furan-3-one reductase-like [Phalaenopsis equestris]	0	14.976	7	2	11	2	383	2611.54
High	XP_020593580.1	mannose-1-phosphate guanyltransferase alpha isoform X1 [Phalaenopsis equestris]	0	8.062	6	2	16	2	420	3542.51
High	XP_020593906.1	hexokinase-2-like [Phalaenopsis equestris]	0	24.636	15	6	31	2	449	7137.69
High	XP_020593973.1	polyadenylate-binding protein RBP45-like [Phalaenopsis equestris]	0	6.647	4	2	10	2	434	1750.67
High	XP_020594029.1	NADP-dependent malic enzyme-like [Phalaenopsis equestris]	0	45.901	16	7	72	2	585	13712.6	18.8
High	XP_020594620.1	stromal 70 kDa heat shock-related protein, chloroplastic-like, partial [Phalaenopsis equestris]	0	60.077	32	11	77	2	405	14239.7	43.66
High	XP_020595558.1	ornithine carbamoyltransferase, chloroplastic [Phalaenopsis equestris]	0	10.839	9	3	14	2	385	2747.35
High	XP_020595560.1	2-hydroxyacyl-CoA lyase [Phalaenopsis equestris]	0	13.335	6	2	9	2	578	2727.05
High	XP_020596215.1	non-symbiotic hemoglobin 1-like [Phalaenopsis equestris]	0	32.098	17	3	35	2	172	11455
High	XP_020596445.1	ketol-acid reductoisomerase, chloroplastic isoform X1 [Phalaenopsis equestris]	0	47.931	16	4	30	2	595	6443.99	49.73
High	XP_020596697.1	40S ribosomal protein S25 [Phalaenopsis equestris]	0.002	4.895	11	2	10	2	108	1828.82
High	XP_020596794.1	ran-binding protein 1 homolog a-like [Phalaenopsis equestris]	0	7.063	16	2	10	2	214	1499.52	10.78
High	XP_020596835.1	probable 26S proteasome non-ATPase regulatory subunit 3 [Phalaenopsis equestris]	0	5.766	4	2	11	2	489	2114.09
High	XP_020597117.1	ATP synthase subunit O, mitochondrial-like [Phalaenopsis equestris]	0	5.552	12	2	15	2	248	2428.74
High	XP_020597242.1	glucose-6-phosphate isomerase 1, chloroplastic isoform X1 [Phalaenopsis equestris]	0	5.904	6	2	10	2	616	1613.17	3.56
High	XP_020598416.1	fasciclin-like arabinogalactan protein 8 [Phalaenopsis equestris]	0	13.96	6	2	7	2	422	780.1	15.38
High	XP_020598417.1	elongation factor 2-like [Phalaenopsis equestris]	0	123.757	33	18	163	2	843	23752.8	338.67
High	XP_020598791.1	basic leucine zipper and W2 domain-containing protein 2-like [Phalaenopsis equestris]	0	5.498	6	2	6	2	411	940.51
High	XP_020598868.1	ruvB-like protein 1 [Phalaenopsis equestris]	0	8.302	6	2	10	2	455	1983.55
High	XP_020599362.1	ubiquitin-conjugating enzyme E2 variant 1C [Phalaenopsis equestris]	0	13.691	32	3	14	2	147	2602.7
High	XP_020599441.1	glutathione S-transferase F10-like [Phalaenopsis equestris]	0	6.43	9	2	14	2	216	2399.34
High	XP_020599514.1	guanine nucleotide-binding protein subunit beta-like protein A [Phalaenopsis equestris]	0	20.063	22	5	16	2	323	3826.45
High	XP_020599937.1	eukaryotic translation initiation factor 3 subunit I-like [Phalaenopsis equestris]	0	8.421	8	2	6	2	326	1361.5
High	XP_020600047.1	LOW QUALITY PROTEIN: inosine-5'-monophosphate dehydrogenase-like [Phalaenopsis equestris]	0.002	4.301	6	2	2	2	505	368.3
High	XP_020600132.1	LOW QUALITY PROTEIN: citrate synthase 3, peroxisomal-like [Phalaenopsis equestris]	0	38.6	21	8	42	2	519	9724.6	9.33
High	XP_020671916.1	peroxiredoxin-2C [Dendrobium catenatum]	0	5.879	17	2	5	2	162	738.94	2.81
High	XP_020672259.1	glutamate--cysteine ligase, chloroplastic [Dendrobium catenatum]	0	6.665	4	2	6	2	519	1146.32
High	XP_020672336.1	phosphoenolpyruvate carboxylase 2 [Dendrobium catenatum]	0	28.327	13	8	48	2	965	6665.5	38.22
High	XP_020672355.1	40S ribosomal protein S8 [Dendrobium catenatum]	0	28.203	20	4	48	2	227	11947.5
High	XP_020673494.1	60S ribosomal protein L31 [Dendrobium catenatum]	0	7.11	17	2	11	2	121	1857.31
High	XP_020674130.1	uncharacterized protein LOC110093550 [Dendrobium catenatum]	0	18.701	11	3	20	2	433	5106.07
High	XP_020674141.1	uncharacterized protein LOC110093560 [Dendrobium catenatum]	0	11.588	11	3	10	2	286	2258.56
High	XP_020674285.1	5-methyltetrahydropteroyltriglutamate--homocysteine methyltransferase 2 [Dendrobium catenatum]	0	140.572	33	20	157	2	766	33156.5	87.15	Acetyl [N-Term]
High	XP_020674710.1	60S ribosomal protein L23A [Dendrobium catenatum]	0	10.381	18	2	11	2	155	2495.54
High	XP_020675244.1	probable aldo-keto reductase 2 [Dendrobium catenatum]	0	74.861	20	9	97	2	346	25011.6	0
High	XP_020675505.1	elongation factor 1-delta [Dendrobium catenatum]	0	15.381	8	3	29	2	232	5791.17
High	XP_020675890.2	LOW QUALITY PROTEIN: elongation factor G-2, chloroplastic [Dendrobium catenatum]	0	8.162	4	2	2	2	777	454.88
High	XP_020676420.1	succinate--CoA ligase [ADP-forming] subunit beta, mitochondrial [Dendrobium catenatum]	0	34.111	21	7	52	2	422	8617	41.77
High	XP_020676464.1	40S ribosomal protein S16 [Dendrobium catenatum]	0	5.608	10	2	13	2	146	2397.72
High	XP_020676836.1	mitochondrial proton/calcium exchanger protein [Dendrobium catenatum]	0.002	5.082	4	2	6	2	757	965.11
High	XP_020677122.1	alcohol dehydrogenase 3 isoform X1 [Dendrobium catenatum]	0	11.694	3	2	28	2	383	6247.47
High	XP_020677915.1	elongation factor 1-gamma 2 [Dendrobium catenatum]	0	33.765	13	5	53	2	424	10168.3	36.58
High	XP_020677973.1	pyruvate kinase 1, cytosolic [Dendrobium catenatum]	0	39.921	22	9	62	2	527	13547.4
High	XP_020677977.2	uncharacterized protein LOC110096392 [Dendrobium catenatum]	0	5.756	3	2	12	2	531	2364.98
High	XP_020678136.1	glutamate dehydrogenase 1, mitochondrial isoform X1 [Dendrobium catenatum]	0	10.059	8	2	4	2	475	817.29
High	XP_020678184.1	1-deoxy-D-xylulose 5-phosphate reductoisomerase, chloroplastic isoform X1 [Dendrobium catenatum]	0	6.627	5	2	9	2	470	1765.95
High	XP_020678278.1	phosphoglycerate kinase, cytosolic [Dendrobium catenatum]	0	108.299	29	11	136	2	401	36301.4	15.98
High	XP_020678409.1	glyceraldehyde-3-phosphate dehydrogenase GAPCP2, chloroplastic [Dendrobium catenatum]	0	19.549	10	3	40	2	431	9680.3
High	XP_020678707.1	serine/arginine-rich splicing factor RSZ21A [Dendrobium catenatum]	0	6.056	13	2	8	2	207	1098.25
High	XP_020679007.1	fructose-bisphosphate aldolase 3, chloroplastic [Dendrobium catenatum]	0	9.399	16	3	13	2	307	710.75	41.13
High	XP_020679023.1	external alternative NAD(P)H-ubiquinone oxidoreductase B2, mitochondrial [Dendrobium catenatum]	0	5.975	4	2	13	2	579	2415.24
High	XP_020679120.1	fructose-bisphosphate aldolase 1, cytoplasmic [Dendrobium catenatum]	0	45.97	16	5	51	2	358	9208.34	75.21
High	XP_020679258.1	profilin [Dendrobium catenatum]	0	10.216	18	2	19	2	131	4049.68
High	XP_020679342.1	3-ketoacyl-CoA thiolase 2, peroxisomal [Dendrobium catenatum]	0	50.228	25	7	73	2	459	5674.32	151.74
High	XP_020679561.1	uncharacterized protein LOC110097510 isoform X1 [Dendrobium catenatum]	0	7.892	16	2	12	2	162	2863.05
High	XP_020679969.1	ubiquitin-conjugating enzyme E2 7 [Dendrobium catenatum]	0	23.318	49	5	21	2	168	2971.18	14.13	Acetyl [N-Term]; Met-loss+Acetyl [N-Term]
High	XP_020680229.1	dihydroxy-acid dehydratase, chloroplastic [Dendrobium catenatum]	0	9.847	6	2	19	2	604	4429.09
High	XP_020680264.1	caffeic acid 3-O-methyltransferase [Dendrobium catenatum]	0	8.902	6	2	10	2	363	2128.75
High	XP_020680644.1	xyloglucan endotransglucosylase/hydrolase protein 22 [Dendrobium catenatum]	0	11.845	9	2	9	2	287	1814.61
High	XP_020680850.1	dihydropyrimidine dehydrogenase (NADP(+)), chloroplastic [Dendrobium catenatum]	0	7.598	5	2	11	2	423	2237.95
High	XP_020681014.1	hexokinase-1-like [Dendrobium catenatum]	0	25.097	13	6	31	2	497	6830.43
High	XP_020681157.1	uncharacterized protein LOC110098618 [Dendrobium catenatum]	0	11.056	5	2	22	2	241	4368.67
High	XP_020681903.1	protein TIC 40, chloroplastic isoform X1 [Dendrobium catenatum]	0	6.483	4	2	3	2	371	643.98
High	XP_020682027.1	alcohol dehydrogenase 1B-like [Dendrobium catenatum]	0	9.322	11	2	7	2	357	1642.42	7.3
High	XP_020682257.1	histone H2AX [Dendrobium catenatum]	0	20.224	54	4	44	2	139	2037.46	164.42
High	XP_020683660.1	UDP-D-apiose/UDP-D-xylose synthase 2 [Dendrobium catenatum]	0	6.937	7	2	2	2	391	428.02
High	XP_020684272.1	ubiquitin-conjugating enzyme E2 variant 1C [Dendrobium catenatum]	0	10.157	28	3	13	2	147	2019.84	0
High	XP_020684539.1	coatomer subunit alpha-3-like [Dendrobium catenatum]	0	6.146	3	2	5	2	1217	223.94	10.01
High	XP_020686374.1	dihydrolipoyl dehydrogenase 1, mitochondrial [Dendrobium catenatum]	0	12.626	9	4	26	2	409	4882.56
High	XP_020686612.1	probable calcium-binding protein CML7 [Dendrobium catenatum]	0.002	4.984	16	2	3	2	147	351.37	0
High	XP_020686790.1	dihydrolipoyl dehydrogenase 2, chloroplastic [Dendrobium catenatum]	0	10.024	5	2	9	2	572	1534.93	0
High	XP_020687220.1	peroxidase 12-like, partial [Dendrobium catenatum]	0	22.158	18	3	40	2	214	8945.93
High	XP_020687226.1	14-3-3-like protein [Dendrobium catenatum]	0	81.012	47	10	88	2	257	19550.5	119.55
High	XP_020687478.1	60S ribosomal protein L3 [Dendrobium catenatum]	0	17.828	17	5	32	2	389	4271.44	40.62
High	XP_020687856.1	pyruvate dehydrogenase E1 component subunit beta-1, mitochondrial isoform X1 [Dendrobium catenatum]	0	26.255	12	3	26	2	373	6689.13
High	XP_020688017.1	MFP1 attachment factor 1-like [Dendrobium catenatum]	0	8.66	7	2	13	2	187	2615.61
High	XP_020688136.1	adenine phosphoribosyltransferase 1 [Dendrobium catenatum]	0	9.582	11	2	19	2	230	4192.48
High	XP_020688191.1	uncharacterized protein LOC110103721 [Dendrobium catenatum]	0	6.938	4	2	10	2	756	1808.28
High	XP_020688430.2	probable cytosolic oligopeptidase A [Dendrobium catenatum]	0	29.902	11	8	31	2	772	6853.56
High	XP_020688659.1	aminomethyltransferase, mitochondrial [Dendrobium catenatum]	0	7.837	9	2	13	2	408	228.37	42.55
High	XP_020688671.1	NADPH:quinone oxidoreductase [Dendrobium catenatum]	0	6.187	7	2	13	2	190	2180.93
High	XP_020689003.1	triosephosphate isomerase, chloroplastic isoform X1 [Dendrobium catenatum]	0	7.194	11	3	12	2	304	2181
High	XP_020689035.1	peptidyl-prolyl cis-trans isomerase [Dendrobium catenatum]	0	7.173	18	3	11	2	173	1689.22
High	XP_020689074.1	glycine-rich protein 2-like [Dendrobium catenatum]	0	13.845	12	2	24	2	222		107.25
High	XP_020689282.1	eukaryotic initiation factor 4A-3 [Dendrobium catenatum]	0	19.928	10	3	22	2	406	4658.41
High	XP_020689536.1	chlorophyll a-b binding protein 5, chloroplastic [Dendrobium catenatum]	0	21.564	25	4	15	2	266	2792.63	9.37
High	XP_020689760.1	proteasome subunit alpha type-3 [Dendrobium catenatum]	0	17.775	16	3	24	2	249	6897.11		Met-loss+Acetyl [N-Term]
High	XP_020690101.1	aquaporin PIP2-7-like [Dendrobium catenatum]	0.002	5.281	18	2	4	2	219	138.87	12.49
High	XP_020690456.1	biotin carboxylase 2, chloroplastic isoform X4 [Dendrobium catenatum]	0	28.723	25	7	43	2	535	7952.59	32.64
High	XP_020690498.1	probable protein phosphatase 2C 62 isoform X1 [Dendrobium catenatum]	0	8.285	9	2	11	2	285	2127.72
High	XP_020691094.2	bibenzyl synthase-like [Dendrobium catenatum]	0	5.599	4	2	11	2	437	2122.99
High	XP_020691110.1	annexin D1 [Dendrobium catenatum]	0	13.783	15	4	31	2	316	6593.21
High	XP_020691123.1	mitochondrial-processing peptidase subunit alpha [Dendrobium catenatum]	0	13.053	9	4	19	2	507	3672.13
High	XP_020691319.1	coatomer subunit delta-2 isoform X1 [Dendrobium catenatum]	0.002	4.65	4	2	13	2	521	2319.87
High	XP_020691338.1	NADP-dependent malic enzyme isoform X1 [Dendrobium catenatum]	0	25.913	14	7	46	2	632	4445.05	63.11
High	XP_020691480.1	bifunctional epoxide hydrolase 2 [Dendrobium catenatum]	0.002	4.552	6	2	9	2	319	1581.01
High	XP_020691500.1	V-type proton ATPase subunit a3 [Dendrobium catenatum]	0	5.561	3	2	3	2	823	579.99
High	XP_020691769.1	ABC transporter G family member 44-like [Dendrobium catenatum]	0	10.699	3	2	9	2	1435	717.56	17.24
High	XP_020691788.1	alpha-amylase isozyme 3D [Dendrobium catenatum]	0	12.972	5	2	8	2	428	1888.51
High	XP_020691918.1	allene oxide synthase 2 [Dendrobium catenatum]	0.002	4.655	4	2	10	2	505	1848.8
High	XP_020692203.1	pectinesterase [Dendrobium catenatum]	0	18.797	4	2	35	2	542	9297.7
High	XP_020692354.2	1,2-dihydroxy-3-keto-5-methylthiopentene dioxygenase homolog 2-like, partial [Dendrobium catenatum]	0	12.384	16	3	16	2	153	3336.44
High	XP_020692897.1	leucine-rich repeat extensin-like protein 3 [Dendrobium catenatum]	0	8.381	3	2	6	2	848	1309.79
High	XP_020692898.1	coatomer subunit beta'-1 isoform X1 [Dendrobium catenatum]	0.002	5.348	3	2	3	2	910	566.08
High	XP_020693099.2	actin-depolymerizing factor 7 isoform X2 [Dendrobium catenatum]	0	43.014	21	7	49	2	242	7671.95	54.08
High	XP_020693401.1	fructose-bisphosphate aldolase, chloroplastic [Dendrobium catenatum]	0	6.117	8	3	8	2	389	954.92	4.76
High	XP_020694037.1	ERBB-3 BINDING PROTEIN 1 [Dendrobium catenatum]	0	8.702	12	3	11	2	395	1825.84
High	XP_020694140.1	probable linoleate 9S-lipoxygenase 5 [Dendrobium catenatum]	0	12.449	4	3	32	2	857	2654.14	63.64
High	XP_020694355.1	thiamine thiazole synthase, chloroplastic isoform X2 [Dendrobium catenatum]	0	7.888	8	2	10	2	352	2366.13
High	XP_020694938.1	pirin-like protein isoform X1 [Dendrobium catenatum]	0	6.231	7	2	9	2	304	1502.62
High	XP_020695565.1	pathogenesis-related protein 1-like [Dendrobium catenatum]	0	48.934	8	2	229	2	178	62724
High	XP_020695769.1	phospho-2-dehydro-3-deoxyheptonate aldolase 2, chloroplastic [Dendrobium catenatum]	0	18.39	14	6	13	2	540	2503.89
High	XP_020695923.1	delta-aminolevulinic acid dehydratase, chloroplastic [Dendrobium catenatum]	0.002	4.847	8	2	4	2	417	147.91	7.2
High	XP_020695997.2	peroxidase 5-like [Dendrobium catenatum]	0	8.457	7	2	14	2	442	2328.32	5.51
High	XP_020696045.1	2-Cys peroxiredoxin BAS1, chloroplastic [Dendrobium catenatum]	0	11.524	7	2	10	2	269	3122.39
High	XP_020696233.1	40S ribosomal protein S4-3 [Dendrobium catenatum]	0	16.08	15	4	24	2	265	5371.72
High	XP_020696456.1	60S ribosomal protein L6-3-like [Dendrobium catenatum]	0.002	4.912	10	2	9	2	231	2040.41
High	XP_020697453.1	40S ribosomal protein S2-3-like [Dendrobium catenatum]	0	15.823	7	2	8	2	277	1771.11
High	XP_020697542.1	sucrose synthase 2 [Dendrobium catenatum]	0	107.781	20	15	116	2	807	23123.5	97.21
High	XP_020697631.1	thioredoxin H1 [Dendrobium catenatum]	0	10.646	19	2	12	2	115	2940.39
High	XP_020698041.1	peroxidase 5-like [Dendrobium catenatum]	0	6.002	17	2	11	2	355		28.2
High	XP_020698051.1	protein disulfide isomerase-like 2-2 [Dendrobium catenatum]	0	20.743	9	2	21	2	360	5307.32
High	XP_020698310.1	glutamate--glyoxylate aminotransferase 2 [Dendrobium catenatum]	0.002	5.232	6	2	2	2	481	316.52
High	XP_020699291.1	uncharacterized protein LOC110111658 [Dendrobium catenatum]	0.002	3.998	5	2	2	2	640	255.91
High	XP_020699508.1	basic transcription factor 3 [Dendrobium catenatum]	0	8.442	12	2	3	2	162	797.62
High	XP_020699925.2	uncharacterized protein LOC110112157 [Dendrobium catenatum]	0.002	5.304	5	2	6	2	430	1037.61
High	XP_020700037.1	phosphoglycerate kinase, cytosolic [Dendrobium catenatum]	0	47.066	23	8	60	2	482	13898.8	0
High	XP_020700196.1	aspartyl protease AED3-like [Dendrobium catenatum]	0	6.912	5	2	7	2	446	1399.28
High	XP_020700310.1	uncharacterized protein LOC110112429 [Dendrobium catenatum]	0	7.881	10	3	9	2	352	1386.06
High	XP_020700361.1	40S ribosomal protein S12-like [Dendrobium catenatum]	0	12.781	20	2	17	2	138	3522.2
High	XP_020700773.1	calcium-dependent protein kinase 1 [Dendrobium catenatum]	0	5.853	6	2	3	2	521	516.58
High	XP_020701203.1	probable protein phosphatase 2C 11 [Dendrobium catenatum]	0	7.309	6	2	4	2	356	788.05
High	XP_020701278.1	glucose-6-phosphate isomerase, cytosolic isoform X1 [Dendrobium catenatum]	0	27.372	12	5	35	2	568	7240.36
High	XP_020701895.1	DNA damage-repair/toleration protein DRT102 [Dendrobium catenatum]	0	7.76	10	2	12	2	312	1639.22	9.05
High	XP_020702562.1	fructose-1,6-bisphosphatase, chloroplastic [Dendrobium catenatum]	0	8.052	7	2	6	2	417	1293.44
High	XP_020703180.1	uncharacterized protein LOC110114591 [Dendrobium catenatum]	0	19.746	19	3	34	2	140	8127.21
High	XP_020703650.1	uncharacterized protein LOC110114931 isoform X1 [Dendrobium catenatum]	0	7.409	9	2	11	2	271	1897.71
High	XP_020703663.1	acyl-CoA-binding protein [Dendrobium catenatum]	0	19.621	16	2	36	2	89	8904.89
High	XP_020703959.1	luminal-binding protein 4 [Dendrobium catenatum]	0	119.357	26	14	164	2	628	33047.6	121.99
High	XP_020704007.1	signal recognition particle 14 kDa protein [Dendrobium catenatum]	0	5.695	20	2	3	2	116	548.35
High	XP_020704418.1	uncharacterized protein LOC110115501 isoform X1 [Dendrobium catenatum]	0	7.045	15	2	5	2	136	1043.59
High	XP_020704446.2	uncharacterized protein LOC110115525 [Dendrobium catenatum]	0.002	5.089	8	2	6	2	382	890.65
High	XP_020704602.1	non-symbiotic hemoglobin [Dendrobium catenatum]	0	22.187	18	3	33	2	170	8842.96
High	XP_020704845.1	tubulin beta-5 chain [Dendrobium catenatum]	0	108.989	42	18	137	2	446	33402.4	6.69
High	XP_020705167.1	cytochrome c oxidase subunit 5b-1, mitochondrial [Dendrobium catenatum]	0	7.151	34	2	16	2	167		34.12
High	XP_020705960.1	KH domain-containing protein At4g18375 [Dendrobium catenatum]	0	16.169	4	4	30	2	616	7092.12
High	XP_028548099.1	phosphoglucomutase, chloroplastic [Dendrobium catenatum]	0	24.256	11	6	42	2	612	5041.43	42.32
High	XP_028548410.1	vacuolar-sorting protein BRO1 [Dendrobium catenatum]	0	6.944	2	2	4	2	833	856.97		Acetyl [N-Term]; Met-loss+Acetyl [N-Term]
High	XP_028548635.1	PITH domain-containing protein At3g04780 [Dendrobium catenatum]	0	8.951	13	2	8	2	228	1918.93
High	XP_028548855.1	protein FAR1-RELATED SEQUENCE 5 isoform X1 [Dendrobium catenatum]	0	7.252	2	2	4	2	671	875.59		Met-loss+Acetyl [N-Term]
High	XP_028549213.1	granule-bound starch synthase 1b, chloroplastic/amyloplastic [Dendrobium catenatum]	0	5.975	3	2	6	2	614	1026.28
High	XP_028552545.1	probable glutathione S-transferase GSTF1 [Dendrobium catenatum]	0.002	4.72	9	2	11	2	255	2119.93
High	XP_028553051.1	malate dehydrogenase, chloroplastic [Dendrobium catenatum]	0	49.569	27	8	66	2	413	12796.2	52.87
High	XP_028555495.1	actin-7 [Dendrobium catenatum]	0	130.234	65	19	148	2	377	14599.9	395.29	Acetyl [N-Term]; Met-loss+Acetyl [N-Term]
High	XP_028555524.1	ubiquitin fusion degradation protein 1 homolog isoform X1 [Dendrobium catenatum]	0	10.301	10	2	7	2	317	1619.02		Acetyl [N-Term]
High	XP_028555812.1	LOW QUALITY PROTEIN: probable beta-D-xylosidase 6 [Dendrobium catenatum]	0	7.308	4	2	5	2	765	991.22
High	XP_028555979.1	uncharacterized protein LOC110103452 [Dendrobium catenatum]	0.002	4.92	3	2	3	2	1151	495.97
High	XP_028556317.1	furostanol glycoside 26-O-beta-glucosidase-like [Dendrobium catenatum]	0	27.887	7	4	53	2	436	11516.7
High	XP_028557198.1	4-hydroxy-3-methylbut-2-en-1-yl diphosphate synthase (ferredoxin), chloroplastic [Dendrobium catenatum]	0	6.218	3	2	4	2	745	746.26
High	YP_006073253.1	ATP synthase CF1 alpha subunit (chloroplast) [Phalaenopsis equestris]	0	9.794	12	4	9	2	507	1011.61	2.65
High	YP_009472272.1	ribulose-1,5-bisphosphate carboxylase/oxygenase large subuni (chloroplast) [Dendrobium catenatum]	0	95.307	40	15	161	2	490	13791.7	263.51
High	YP_009472290.1	photosystem II 47 kDa protein (chloroplast) [Dendrobium catenatum]	0	9.844	7	2	7	2	508	441.94	21.47
High	YP_009472313.1	photosystem I subunit VII (chloroplast) [Dendrobium catenatum]	0	7.605	31	2	4	2	81	657.63
High	A2Z3C4	Probable 6-phosphogluconolactonase 4, chloroplastic OS=Oryza sativa subsp. indica GN=OsI_031067 PE=3 SV=2	0.003	2.677	4	1	6	1	324		10.02
High	A3BMZ5	Beta-glucosidase 26 OS=Oryza sativa subsp. japonica GN=BGLU26 PE=1 SV=1	0.002	4.603	3	2	57	1	510		69.34
High	A3C053	Beta-glucosidase 29 OS=Oryza sativa subsp. japonica GN=BGLU29 PE=2 SV=2	0.002	4.171	3	2	57	1	494		76.22
High	A9SDW6	1,2-dihydroxy-3-keto-5-methylthiopentene dioxygenase 1 OS=Physcomitrella patens subsp. patens GN=PHYPADRAFT_128349 PE=3 SV=1	0.002	3.397	5	1	9	1	194		15.44
High	B0YPM5	ATP synthase subunit alpha, plastid OS=Aneura mirabilis GN=atpA PE=3 SV=1	0.004	2.071	2	1	8	1	507		1.62
High	B7FKW7	Cyanate hydratase OS=Medicago truncatula GN=CYN PE=2 SV=1	0.005	1.979	5	1	6	1	165		7.01
High	F4I1L3	Acetyl-CoA carboxylase 2 OS=Arabidopsis thaliana GN=ACC2 PE=2 SV=1	0.002	3.321	1	1	1	1	2355		3.14
High	O04130	D-3-phosphoglycerate dehydrogenase, chloroplastic OS=Arabidopsis thaliana GN=At1g17745 PE=1 SV=2	0.008	1.682	1	1	4	1	624		0
High	O04487	Probable elongation factor 1-gamma 1 OS=Arabidopsis thaliana GN=At1g09640 PE=2 SV=1	0.003	2.463	5	1	1	1	414		2.02
High	O22643	Acyl-CoA-binding protein OS=Fritillaria agrestis GN=ACABP PE=3 SV=1	0.002	4.597	17	2	12	1	87		5.08
High	O23708	Proteasome subunit alpha type-2-A OS=Arabidopsis thaliana GN=PAB1 PE=1 SV=1	0.003	2.243	6	1	3	1	235		5.27
High	O23715	Proteasome subunit alpha type-3 OS=Arabidopsis thaliana GN=PAG1 PE=1 SV=2	0	7.119	10	2	9	1	249		8.82
High	O24047	Malate dehydrogenase, cytoplasmic OS=Mesembryanthemum crystallinum GN=MDH PE=2 SV=1	0	7.916	22	4	9	1	332		13.81
High	O24174	Betaine aldehyde dehydrogenase OS=Oryza sativa subsp. japonica GN=Os04g0464200 PE=2 SV=1	0.002	3.638	3	1	7	1	505		13.01
High	O48551	Proteasome subunit alpha type-6 OS=Glycine max GN=PAA1 PE=2 SV=2	0	5.568	8	2	11	1	246		20.69
High	O48905	Malate dehydrogenase, cytoplasmic OS=Medicago sativa GN=CMDH PE=2 SV=1	0.002	4.79	14	2	7	1	332		15.54
High	O49543	Cysteine desulfurase 1, mitochondrial OS=Arabidopsis thaliana GN=NIFS PE=1 SV=1	0	6.888	4	1	8	1	453		24.79
High	O64394	Thioredoxin H-type OS=Triticum aestivum PE=1 SV=3	0.002	3.65	9	1	10	1	127		20.83
High	O64882	Beta-glucosidase 17 OS=Arabidopsis thaliana GN=BGLU17 PE=2 SV=1	0.002	4.53	3	2	73	1	517		97.3
High	O65107	Photosystem I reaction center subunit N, chloroplastic (Fragment) OS=Zea mays GN=PSAN PE=3 SV=1	0.003	2.398	9	1	1	1	112		1.88
High	O81221	Actin OS=Gossypium hirsutum PE=3 SV=1	0	9.125	23	6	15	1	377		5.02
High	O82399	Probable malate dehydrogenase, glyoxysomal OS=Arabidopsis thaliana GN=At2g22780 PE=1 SV=1	0	5.591	6	1	8	1	354		24.82
High	O82772	Probable inactive beta-glucosidase 25 OS=Arabidopsis thaliana GN=BGLU25 PE=2 SV=1	0.002	4.064	3	2	55	1	531		69.34
High	P07689	Ribulose bisphosphate carboxylase small chain 3A, chloroplastic OS=Pisum sativum GN=RBCS-3A PE=1 SV=1	0	9.114	19	4	8	1	180		5.8
High	P07694	Glutamine synthetase root isozyme A OS=Pisum sativum GN=GS3A PE=2 SV=1	0.003	2.73	4	1	4	1	357		7.48
High	P08440	Fructose-bisphosphate aldolase, cytoplasmic isozyme OS=Zea mays PE=2 SV=1	0.008	1.698	6	1	2	1	355		0
High	P08926	RuBisCO large subunit-binding protein subunit alpha, chloroplastic OS=Pisum sativum PE=1 SV=2	0	6.129	6	4	7	1	587		1.67
High	P09189	Heat shock cognate 70 kDa protein OS=Petunia hybrida GN=HSP70 PE=2 SV=1	0	11.765	10	5	15	1	651		24.05
High	P10053	Ribulose bisphosphate carboxylase small chain, chloroplastic OS=Pinus thunbergii GN=RBCS PE=2 SV=1	0.008	1.705	4	1	1	1	171		0
High	P11143	Heat shock 70 kDa protein OS=Zea mays GN=HSP70 PE=3 SV=2	0	8.911	7	5	14	1	645		14.13
High	P11796	Superoxide dismutase [Mn], mitochondrial OS=Nicotiana plumbaginifolia GN=SODA PE=1 SV=1	0	9.391	6	1	16	1	228		24.83
High	P12863	Triosephosphate isomerase, cytosolic OS=Zea mays PE=3 SV=3	0	7.601	18	4	6	1	253		7.6
High	P16096	Fructose-bisphosphate aldolase, chloroplastic OS=Spinacia oleracea PE=1 SV=3	0	6.615	13	2	4	1	394		12.01
High	P16097	Phosphoenolpyruvate carboxylase 2 OS=Mesembryanthemum crystallinum GN=PPC2 PE=3 SV=1	0	11.687	8	5	16	1	960		20.42
High	P17094	60S ribosomal protein L3-1 OS=Arabidopsis thaliana GN=ARP1 PE=2 SV=5	0	9.677	7	4	16	1	389		18.28
High	P17688	3-phosphoshikimate 1-carboxyvinyltransferase, chloroplastic OS=Brassica napus PE=3 SV=1	0.003	2.539	1	1	3	1	516		1.67
High	P17745	Elongation factor Tu, chloroplastic OS=Arabidopsis thaliana GN=TUFA PE=1 SV=1	0	12.839	4	1	6	1	476		27.67
High	P17784	Fructose-bisphosphate aldolase cytoplasmic isozyme OS=Oryza sativa subsp. japonica GN=FBA PE=1 SV=2	0	7.386	12	3	6	1	358		6.42
High	P18122	Catalase isozyme 1 OS=Zea mays GN=CAT1 PE=2 SV=1	0.005	1.959	1	1	3	1	492		1.63
High	P18566	Ribulose bisphosphate carboxylase small chain A, chloroplastic OS=Oryza sativa subsp. japonica GN=RBCS-A PE=2 SV=2	0	6.421	16	4	7	1	175		1.67
High	P22201	ATP synthase subunit alpha, mitochondrial OS=Brassica napus GN=ATPA PE=3 SV=1	0	33.964	16	8	46	1	507		118.57
High	P22738	60S ribosomal protein L3-2 OS=Arabidopsis thaliana GN=ARP2 PE=2 SV=4	0	6.812	7	3	18	1	390		13.94
High	P22954	Probable mediator of RNA polymerase II transcription subunit 37c OS=Arabidopsis thaliana GN=MED37D PE=1 SV=2	0.002	5.094	8	3	6	1	653		0
High	P24636	Tubulin beta-4 chain OS=Arabidopsis thaliana GN=TUBB4 PE=2 SV=2	0	9.799	11	5	19	1	444		20.6
High	P25890	Catalase OS=Pisum sativum PE=2 SV=1	0.002	3.518	3	2	10	1	494		0
High	P26300	Enolase OS=Solanum lycopersicum GN=PGH1 PE=2 SV=1	0	10.413	14	6	19	1	444		7.29
High	P26519	Glyceraldehyde-3-phosphate dehydrogenase, cytosolic OS=Petroselinum crispum GN=GAPC PE=2 SV=1	0	14.425	16	6	37	1	336		14.54
High	P26969	Glycine dehydrogenase [decarboxylating], mitochondrial OS=Pisum sativum GN=GDCSP PE=1 SV=1	0.002	3.037	1	1	5	1	1057		5.58
High	P27322	Heat shock cognate 70 kDa protein 2 OS=Solanum lycopersicum GN=HSC-2 PE=2 SV=1	0	12.07	10	5	15	1	644		24.81
High	P27481	Linoleate 9S-lipoxygenase (Fragment) OS=Phaseolus vulgaris PE=2 SV=1	0.002	4.925	1	1	19	1	741		27.19
High	P27522	Chlorophyll a-b binding protein 8, chloroplastic OS=Solanum lycopersicum GN=CAB8 PE=3 SV=1	0	5.68	6	1	3	1	273		7.3
High	P27608	Phospho-2-dehydro-3-deoxyheptonate aldolase 1, chloroplastic OS=Nicotiana tabacum GN=DHAPS-1 PE=2 SV=1	0.003	2.29	1	1	3	1	542		0
High	P28458	Ribulose bisphosphate carboxylase large chain (Fragment) OS=Trochodendron aralioides GN=rbcL PE=3 SV=1	0	6.4	17	4	10	1	465		2.56
High	P28996	Elongation factor 2 OS=Parachlorella kessleri PE=2 SV=1	0	15.571	3	1	7	1	845		28.58
High	P29196	Phosphoenolpyruvate carboxylase OS=Solanum tuberosum GN=PPC1 PE=2 SV=2	0	12.263	7	4	6	1	965		16.49
High	P29402	Calnexin homolog 1 OS=Arabidopsis thaliana GN=CNX1 PE=1 SV=1	0.002	3.281	2	1	5	1	530		10.95
High	P29513	Tubulin beta-5 chain OS=Arabidopsis thaliana GN=TUBB5 PE=2 SV=1	0	9.546	11	5	12	1	449		1.9
High	P31023	Dihydrolipoyl dehydrogenase, mitochondrial OS=Pisum sativum GN=LPD PE=1 SV=2	0	7.257	5	2	8	1	501		12.25
High	P34105	NADP-dependent malic enzyme OS=Populus trichocarpa PE=2 SV=3	0	9.586	8	3	20	1	591		56.83
High	P34921	Glyceraldehyde-3-phosphate dehydrogenase, cytosolic OS=Dianthus caryophyllus GN=GAPC PE=3 SV=1	0	72.509	30	8	59	1	338		147.68
High	P34922	Glyceraldehyde-3-phosphate dehydrogenase, cytosolic OS=Pisum sativum GN=GAPC1 PE=2 SV=1	0	87.965	27	12	90	1	338		166.01
High	P37223	NADP-dependent malic enzyme OS=Mesembryanthemum crystallinum GN=MOD1 PE=2 SV=1	0	8.257	3	2	14	1	585		19.09
High	P38415	Linoleate 9S-lipoxygenase A OS=Solanum lycopersicum GN=LOX1.1 PE=2 SV=1	0	15.203	3	2	23	1	860		51.11
High	P40412	T-complex protein 1 subunit epsilon OS=Avena sativa PE=2 SV=1	0	6.653	5	2	6	1	535		8.97	Met-loss+Acetyl [N-Term]
High	P41127	60S ribosomal protein L13-1 OS=Arabidopsis thaliana GN=RPL13B PE=1 SV=1	0.008	1.674	12	1	2	1	206		0
High	P41376	Eukaryotic initiation factor 4A-1 OS=Arabidopsis thaliana GN=TIF4A-1 PE=1 SV=1	0	7.275	13	5	6	1	412		7.07
High	P42056	Mitochondrial outer membrane protein porin of 36 kDa OS=Solanum tuberosum PE=1 SV=2	0	5.486	4	1	12	1	276		9.08
High	P43643	Elongation factor 1-alpha OS=Nicotiana tabacum PE=2 SV=1	0	12.45	13	6	11	1	447		5.28
High	P46280	Elongation factor Tu, chloroplastic OS=Glycine max GN=TUFB1 PE=3 SV=1	0.002	3.455	2	1	8	1	479		15.51
High	P46299	40S ribosomal protein S4 OS=Gossypium hirsutum GN=RPS4 PE=2 SV=1	0	6.114	11	3	11	1	262		19.24
High	P46300	40S ribosomal protein S4 OS=Solanum tuberosum GN=RPS4 PE=2 SV=1	0.002	4.405	10	3	3	1	264		0
High	P46637	Arginase OS=Arabidopsis thaliana GN=At4g08900 PE=2 SV=1	0.003	2.268	4	1	1	1	342		2.04
High	P47998	Cysteine synthase OS=Arabidopsis thaliana GN=OASA1 PE=1 SV=2	0.005	1.996	4	1	1	1	322		2.19
High	P49027	Guanine nucleotide-binding protein subunit beta-like protein A OS=Oryza sativa subsp. japonica GN=RACK1A PE=1 SV=1	0.002	2.622	2	1	1	1	334		0
High	P49039	Sucrose synthase OS=Solanum tuberosum PE=3 SV=1	0.002	4.104	2	2	10	1	805		2.03
High	P49104	Ras-related protein Rab-2-B OS=Zea mays GN=RAB2B PE=2 SV=1	0.003	2.32	11	1	2	1	210		0
High	P49249	IN2-2 protein OS=Zea mays GN=IN2-2 PE=2 SV=1	0	21.511	16	6	12	1	306		25.19
High	P49318	Catalase isozyme 2 OS=Ricinus communis GN=CAT2 PE=2 SV=1	0	7.765	9	3	13	1	492		8.06
High	P49608	Aconitate hydratase, cytoplasmic OS=Cucurbita maxima PE=2 SV=1	0	10.579	9	6	19	1	898		30.27
High	P50162	Tropinone reductase 1 OS=Datura stramonium GN=TR1 PE=1 SV=1	0.006	1.832	4	1	2	1	273		0
High	P50318	Phosphoglycerate kinase 2, chloroplastic OS=Arabidopsis thaliana GN=At1g56190 PE=1 SV=3	0	8.782	14	4	5	1	478		10.55
High	P51414	60S ribosomal protein L26-1 OS=Arabidopsis thaliana GN=RPL26A PE=2 SV=2	0.005	1.956	4	1	3	1	146		0
High	P51427	40S ribosomal protein S5-2 OS=Arabidopsis thaliana GN=RPS5B PE=1 SV=2	0	7.2	10	1	2	1	207		5.81	Met-loss+Acetyl [N-Term]
High	P52578	Isoflavone reductase homolog OS=Solanum tuberosum PE=2 SV=1	0	5.945	4	1	14	1	308		2.13
High	P52712	Serine carboxypeptidase-like OS=Oryza sativa subsp. japonica GN=CBP31 PE=2 SV=2	0.002	4.48	4	2	8	1	429		6.92
High	P53491	Actin (Fragment) OS=Acetabularia cliftonii PE=3 SV=1	0	12.559	17	4	16	1	353		16.35
High	P53535	Alpha-1,4 glucan phosphorylase L-2 isozyme, chloroplastic/amyloplastic OS=Solanum tuberosum GN=STP-1 PE=1 SV=1	0	25.947	6	6	31	1	974		62.58
High	P55228	Glucose-1-phosphate adenylyltransferase small subunit, chloroplastic OS=Arabidopsis thaliana GN=APS1 PE=2 SV=2	0	8.833	10	5	12	1	520		9.14
High	P55229	Glucose-1-phosphate adenylyltransferase large subunit 1, chloroplastic OS=Arabidopsis thaliana GN=ADG2 PE=1 SV=3	0.003	2.293	3	1	1	1	522		1.62
High	P55308	Catalase isozyme 2 OS=Hordeum vulgare GN=CAT2 PE=2 SV=1	0.002	2.926	3	2	7	1	494		0
High	P55747	Serine carboxypeptidase II-1 (Fragment) OS=Hordeum vulgare GN=CXP;2-1 PE=1 SV=1	0	5.949	6	1	3	1	324		9.27
High	P59271	Ubiquitin-40S ribosomal protein S27a-1 OS=Arabidopsis thaliana GN=RPS27AA PE=1 SV=2	0	6.703	28	4	17	1	156		14.4
High	P68158	Elongation factor Tu, chloroplastic OS=Nicotiana tabacum GN=TUFA PE=3 SV=1	0.002	4.255	3	1	5	1	478		10.82
High	P68168	Non-legume hemoglobin OS=Parasponia andersonii PE=1 SV=2	0	7.309	7	1	19	1	162		22.37
High	P68429	Histone H3.2 OS=Medicago sativa GN=H3-1.1 PE=1 SV=2	0.002	4.925	15	3	9	1	136		0
High	P69249	Ribulose bisphosphate carboxylase small chain, chloroplastic OS=Nicotiana tabacum GN=RBCS PE=1 SV=1	0	10.524	21	4	7	1	180		7.74
High	P84577	Putative heat shock protein HSP90 (Fragments) OS=Populus euphratica PE=1 SV=1	0.003	2.666	40	1	1	1	47		1.81
High	P84989	Oxygen-evolving enhancer protein 1, chloroplastic (Fragments) OS=Populus euphratica GN=PSBO PE=1 SV=1	0.006	1.861	10	1	1	1	100		2.78
High	P85951	Aspartate aminotransferase 2 (Fragments) OS=Pseudotsuga menziesii PE=1 SV=1	0.002	3.374	41	1	9	1	34		15.89
High	P86387	Phospholipase D alpha 1 OS=Carica papaya GN=PLD1 PE=1 SV=1	0	23.768	8	5	32	1	808		57.54
High	P92549	ATP synthase subunit alpha, mitochondrial OS=Arabidopsis thaliana GN=ATPA PE=1 SV=2	0	40.661	18	8	60	1	507		150.7
High	P92947	Monodehydroascorbate reductase, chloroplastic OS=Arabidopsis thaliana GN=At1g63940 PE=2 SV=3	0.004	2.046	3	1	8	1	493		2.13
High	P93162	Magnesium-chelatase subunit ChlI, chloroplastic OS=Glycine max GN=CHLI PE=2 SV=1	0.004	2.148	5	1	2	1	421		0
High	P93207	14-3-3 protein 10 OS=Solanum lycopersicum GN=TFT10 PE=2 SV=2	0	7.679	17	3	7	1	252		5.2
High	P93253	Adenosylhomocysteinase OS=Mesembryanthemum crystallinum GN=SAHH PE=2 SV=1	0	8.879	8	4	23	1	485		23.86
High	P93338	NADP-dependent glyceraldehyde-3-phosphate dehydrogenase OS=Nicotiana plumbaginifolia GN=GAPN PE=2 SV=1	0	6.15	6	2	8	1	496		11.94
High	P93374	Actin-53 (Fragment) OS=Nicotiana tabacum PE=3 SV=1	0	16.542	18	5	20	1	336		33.13
High	P93566	Oxygen-evolving enhancer protein 2, chloroplastic OS=Solanum tuberosum GN=PSBP PE=2 SV=1	0.002	4.756	4	1	3	1	260		6.71
High	P93819	Malate dehydrogenase, cytoplasmic 1 OS=Arabidopsis thaliana GN=At1g04410 PE=1 SV=2	0	8.05	15	4	8	1	332		6.08
High	Q00834	Cysteine synthase OS=Spinacia oleracea PE=1 SV=1	0.008	1.712	2	1	2	1	325		0
High	Q01781	Adenosylhomocysteinase OS=Petroselinum crispum GN=SAHH PE=2 SV=2	0	13.478	11	5	25	1	485		37.16
High	Q02028	Stromal 70 kDa heat shock-related protein, chloroplastic OS=Pisum sativum GN=HSP70 PE=2 SV=1	0.002	3.349	2	2	2	1	706		1.94
High	Q05046	Chaperonin CPN60-2, mitochondrial OS=Cucurbita maxima GN=CPN60-2 PE=1 SV=1	0	23.946	14	8	38	1	575		47.62
High	Q05758	Ketol-acid reductoisomerase, chloroplastic OS=Arabidopsis thaliana GN=At3g58610 PE=2 SV=2	0.002	3.731	2	1	1	1	591		2.27
High	Q06735	ATP synthase subunit alpha, mitochondrial OS=Beta vulgaris GN=ATPA PE=3 SV=1	0	49.214	24	12	85	1	506		183.85
High	Q08062	Malate dehydrogenase, cytoplasmic OS=Zea mays PE=2 SV=2	0	8.591	22	4	8	1	332		9.91
High	Q08080	Stromal 70 kDa heat shock-related protein, chloroplastic (Fragment) OS=Spinacia oleracea GN=CHSP70 PE=2 SV=1	0	11.906	9	4	11	1	599		14.96
High	Q08276	Heat shock 70 kDa protein, mitochondrial OS=Solanum tuberosum GN=HSP68 PE=2 SV=1	0	10.631	9	4	22	1	682		43.79
High	Q0JJV1	Mitochondrial outer membrane protein porin 4 OS=Oryza sativa subsp. japonica GN=VDAC4 PE=3 SV=3	0.002	3.156	3	1	8	1	317		12.02
High	Q0WNJ6	Clathrin heavy chain 1 OS=Arabidopsis thaliana GN=CHC1 PE=1 SV=1	0	6.865	5	4	11	1	1705		4.36
High	Q0ZJ24	Photosystem II CP43 chlorophyll apoprotein OS=Vitis vinifera GN=psbC PE=3 SV=1	0.004	2.13	3	1	4	1	473		8.58
High	Q10KF0	Proteasome subunit alpha type-2 OS=Oryza sativa subsp. japonica GN=PAB1 PE=2 SV=1	0.002	3.9	10	2	13	1	235		13.08
High	Q10MW3	Pyruvate decarboxylase isozyme 2 OS=Oryza sativa subsp. japonica GN=PDC2 PE=2 SV=1	0.002	3.529	4	1	1	1	605		2.28
High	Q1WIQ6	NADP-dependent glyceraldehyde-3-phosphate dehydrogenase OS=Arabidopsis thaliana GN=ALDH11A3 PE=1 SV=2	0	6.536	7	2	2	1	496		2.54
High	Q2MIH8	Acetyl-coenzyme A carboxylase carboxyl transferase subunit beta, chloroplastic OS=Solanum bulbocastanum GN=accD PE=3 SV=2	0.002	3.059	2	1	1	1	490		2.09
High	Q2QZ86	ATP-citrate synthase alpha chain protein 2 OS=Oryza sativa subsp. japonica GN=ACLA-2 PE=2 SV=2	0.002	3.57	3	1	3	1	423		6.46
High	Q31672	Ribulose bisphosphate carboxylase large chain (Fragment) OS=Antirhea lucida GN=rbcL PE=3 SV=1	0	30.934	10	6	64	1	469		119.86
High	Q38882	Phospholipase D alpha 1 OS=Arabidopsis thaliana GN=PLDALPHA1 PE=1 SV=2	0.002	4.528	7	3	3	1	810		5.45
High	Q38950	Serine/threonine-protein phosphatase 2A 65 kDa regulatory subunit A beta isoform OS=Arabidopsis thaliana GN=PP2AA2 PE=1 SV=2	0.008	1.714	2	1	4	1	587		0
High	Q39043	Mediator of RNA polymerase II transcription subunit 37f OS=Arabidopsis thaliana GN=MED37F PE=1 SV=2	0	9.382	9	4	17	1	668		22.6
High	Q39994	Calnexin homolog OS=Helianthus tuberosus PE=2 SV=1	0.004	2.136	2	1	1	1	540		0
High	Q3V508	Photosystem II CP47 chlorophyll apoprotein OS=Acorus calamus GN=psbB PE=3 SV=1	0	12.053	4	1	5	1	508		13.76
High	Q40002	V-type proton ATPase catalytic subunit A (Fragment) OS=Hordeum vulgare PE=2 SV=1	0	10.009	11	5	19	1	580		25.05
High	Q40034	Elongation factor 1-alpha OS=Hordeum vulgare GN=BLT63 PE=1 SV=1	0	12.708	19	7	13	1	447		2.31
High	Q40078	V-type proton ATPase subunit B 1 OS=Hordeum vulgare PE=2 SV=1	0	10.792	13	3	11	1	488		23.62
High	Q40401	Calreticulin OS=Nicotiana plumbaginifolia GN=CAL1 PE=2 SV=1	0.002	3.263	5	2	3	1	416		0
High	Q41238	Linoleate 9S-lipoxygenase 6 (Fragment) OS=Solanum tuberosum GN=LOX1.6 PE=1 SV=1	0.002	3.607	2	2	2	1	857		2.69
High	Q41784	Tubulin beta-7 chain OS=Zea mays GN=TUBB7 PE=2 SV=1	0	10.673	18	7	13	1	445		0
High	Q42290	Probable mitochondrial-processing peptidase subunit beta OS=Arabidopsis thaliana GN=At3g02090 PE=1 SV=2	0.005	1.981	1	1	5	1	531		3.42
High	Q42521	Glutamate decarboxylase 1 OS=Arabidopsis thaliana GN=GAD1 PE=1 SV=2	0.003	2.263	2	1	1	1	502		0
High	Q42534	Pectinesterase 2 OS=Arabidopsis thaliana GN=PME2 PE=2 SV=2	0	6.035	2	1	17	1	587		32.87
High	Q42547	Catalase-3 OS=Arabidopsis thaliana GN=CAT3 PE=1 SV=3	0	8.129	8	1	10	1	492		36.6
High	Q42564	L-ascorbate peroxidase 3, peroxisomal OS=Arabidopsis thaliana GN=APX3 PE=1 SV=1	0	7.642	5	1	14	1	287		22.29
High	Q42662	5-methyltetrahydropteroyltriglutamate--homocysteine methyltransferase OS=Solenostemon scutellarioides GN=MET PE=1 SV=2	0	12.852	7	6	14	1	764		17.47
High	Q42686	Malate dehydrogenase, mitochondrial OS=Chlamydomonas reinhardtii PE=3 SV=1	0.002	3.607	5	1	7	1	373		13
High	Q42711	Monodehydroascorbate reductase, seedling isozyme OS=Cucumis sativus PE=2 SV=1	0	5.507	4	3	15	1	434		13.99
High	Q42876	Leucine aminopeptidase 2, chloroplastic OS=Solanum lycopersicum GN=LAPA2 PE=2 SV=1	0.002	3.978	2	1	9	1	569		18.54
High	Q42997	Ferredoxin--nitrite reductase, chloroplastic OS=Oryza sativa subsp. japonica GN=Os01g0357100 PE=2 SV=1	0.002	4.867	2	1	10	1	596		25.43
High	Q43007	Phospholipase D alpha 1 OS=Oryza sativa subsp. japonica GN=PLD1 PE=1 SV=2	0	9.036	8	4	12	1	812		28.8
High	Q43092	Granule-bound starch synthase 1, chloroplastic/amyloplastic OS=Pisum sativum PE=1 SV=1	0	7.786	2	2	23	1	603		43.09
High	Q43127	Glutamine synthetase, chloroplastic/mitochondrial OS=Arabidopsis thaliana GN=GLN2 PE=1 SV=1	0.006	1.856	7	1	1	1	430		2.74
High	Q43130	Enolase OS=Mesembryanthemum crystallinum GN=PGH1 PE=2 SV=1	0	14.378	18	7	20	1	444		8.07
High	Q43470	14-3-3-like protein B OS=Hordeum vulgare PE=2 SV=1	0	11.378	16	3	10	1	262		22.75
High	Q43472	Glycine-rich RNA-binding protein blt801 OS=Hordeum vulgare GN=blt801 PE=1 SV=1	0.005	1.94	4	1	7	1	161		10.71	Met-loss+Acetyl [N-Term]
High	Q43621	Glutathione reductase, cytosolic OS=Pisum sativum PE=2 SV=1	0.002	4.46	5	2	10	1	498		14.49
High	Q43814	Ornithine carbamoyltransferase, chloroplastic OS=Pisum sativum GN=ARGF PE=2 SV=1	0	6.442	6	2	4	1	375		9.16
High	Q43831	RuBisCO large subunit-binding protein subunit beta, chloroplastic (Fragment) OS=Secale cereale GN=CPN60 PE=2 SV=1	0	9.186	11	4	14	1	499		20.6
High	Q53LQ0	Protein disulfide isomerase-like 1-1 OS=Oryza sativa subsp. japonica GN=PDIL1-1 PE=2 SV=1	0.007	1.716	2	1	2	1	512		0
High	Q56WD9	3-ketoacyl-CoA thiolase 2, peroxisomal OS=Arabidopsis thaliana GN=PED1 PE=1 SV=2	0.002	2.846	2	1	7	1	462		12.86
High	Q5GM68	Phosphoenolpyruvate carboxylase 2 OS=Arabidopsis thaliana GN=PPC2 PE=1 SV=2	0	8.418	5	4	13	1	963		21.17
High	Q5I7K3	40S ribosomal protein S29 OS=Triticum aestivum GN=RPS29 PE=1 SV=1	0.004	2.218	13	1	1	1	56		0
High	Q5IH14	Sucrose-phosphatase 1 OS=Nicotiana tabacum GN=SPP1 PE=2 SV=1	0	7.734	4	1	11	1	425		26.12
High	Q5JK35	Beta-glucosidase 5 OS=Oryza sativa subsp. japonica GN=BGLU5 PE=2 SV=1	0.008	1.664	1	1	20	1	513		10.16
High	Q5QNB8	14-3-3-like protein GF14-G OS=Oryza sativa subsp. japonica GN=GF14G PE=2 SV=1	0	7.079	17	3	16	1	257		14.23
High	Q67UF5	Protein disulfide isomerase-like 2-3 OS=Oryza sativa subsp. japonica GN=PDIL2-3 PE=2 SV=1	0.006	1.825	3	1	2	1	441		0
High	Q6F2Y7	Chaperone protein ClpB1 OS=Oryza sativa subsp. japonica GN=CLPB1 PE=2 SV=1	0	11.674	2	1	6	1	912		8.73
High	Q6K5G8	Glyceraldehyde-3-phosphate dehydrogenase 3, cytosolic OS=Oryza sativa subsp. japonica GN=GAPC3 PE=2 SV=1	0	21.819	19	8	51	1	337		19.6
High	Q6NXH9	TREMBL:Q6NXH9 Tax_Id=10090 Gene_Symbol=Krt73 Keratin 73	0	8.969	4	2	5	1	539	1147.61
High	Q6YW46	Elongation factor 1-gamma 2 OS=Oryza sativa subsp. japonica GN=Os02g0220500 PE=2 SV=2	0	7.385	9	3	11	1	418		12.89
High	Q6Z0I4	Enoyl-[acyl-carrier-protein] reductase [NADH] 1, chloroplastic OS=Oryza sativa subsp. japonica GN=Os08g0327400 PE=2 SV=1	0.002	4.709	5	2	9	1	375		19.19
High	Q6ZDY8	Succinate dehydrogenase [ubiquinone] flavoprotein subunit, mitochondrial OS=Oryza sativa subsp. japonica GN=SDH1 PE=2 SV=1	0.002	3.587	3	2	6	1	630		0
High	Q6ZL42	Probable histone H2A.2 OS=Oryza sativa subsp. japonica GN=Os07g0545400 PE=2 SV=1	0.002	5.102	34	2	2	1	135		10.43
High	Q75GT3	Chaperone protein ClpB2, chloroplastic OS=Oryza sativa subsp. japonica GN=CLPB2 PE=2 SV=1	0.002	3.105	2	1	5	1	978		9.56
High	Q7FAE1	Momilactone A synthase OS=Oryza sativa subsp. japonica GN=Os04g0179200 PE=2 SV=1	0	5.511	5	1	9	1	274		22.8
High	Q7FAH2	Glyceraldehyde-3-phosphate dehydrogenase 2, cytosolic OS=Oryza sativa subsp. japonica GN=GAPC2 PE=1 SV=1	0	33.431	29	12	73	1	337		27.11
High	Q84P54	Gamma aminobutyrate transaminase 1, mitochondrial OS=Solanum lycopersicum GN=GABA-TP1 PE=1 SV=1	0.002	4.76	3	1	5	1	515		7.87
High	Q85V31	ATP synthase subunit beta, chloroplastic OS=Schnarfia messeniaca GN=atpB PE=3 SV=1	0.003	2.357	2	1	1	1	495		1.75
High	Q8GUM2	Heat shock 70 kDa protein 9, mitochondrial OS=Arabidopsis thaliana GN=HSP70-9 PE=1 SV=1	0	9.403	5	3	15	1	682		31.4
High	Q8H0X6	Cysteine proteinase inhibitor 6 OS=Arabidopsis thaliana GN=CYS6 PE=1 SV=2	0	14.745	8	1	17	1	234		47.55
High	Q8L7B5	Chaperonin CPN60-like 1, mitochondrial OS=Arabidopsis thaliana GN=At2g33210 PE=1 SV=1	0	24.177	11	6	27	1	585		51.38
High	Q8LA13	DEAD-box ATP-dependent RNA helicase 11 OS=Arabidopsis thaliana GN=RH11 PE=2 SV=1	0.006	1.794	2	1	2	1	612		1.81
High	Q8LDP4	Peptidyl-prolyl cis-trans isomerase CYP19-4 OS=Arabidopsis thaliana GN=CYP19-4 PE=1 SV=2	0.002	5.193	14	3	14	1	201		4.7
High	Q8LE52	Glutathione S-transferase DHAR3, chloroplastic OS=Arabidopsis thaliana GN=DHAR3 PE=1 SV=1	0.004	2.12	4	1	1	1	258		0
High	Q8LF48	3-ketoacyl-CoA thiolase 1, peroxisomal OS=Arabidopsis thaliana GN=KAT1 PE=1 SV=2	0.004	2.192	2	1	4	1	443		7.69
High	Q8LJU5	40S ribosomal protein S7 OS=Oryza sativa subsp. japonica GN=RPS7 PE=2 SV=2	0.004	2.072	4	1	7	1	192		0
High	Q8LPT9	Alpha-glucan water dikinase, chloroplastic OS=Citrus reticulata GN=R1 PE=2 SV=1	0.002	3.855	2	2	2	1	1475		4.35
High	Q8RWN9	Dihydrolipoyllysine-residue acetyltransferase component 2 of pyruvate dehydrogenase complex, mitochondrial OS=Arabidopsis thaliana GN=At3g13930 PE=1 SV=2	0.002	3.837	2	1	11	1	539		25.18
High	Q8W108	1,2-dihydroxy-3-keto-5-methylthiopentene dioxygenase 3 OS=Arabidopsis thaliana GN=ARD3 PE=2 SV=1	0.002	4.122	16	2	3	1	199		2.74
High	Q8W1L6	Peroxisomal fatty acid beta-oxidation multifunctional protein OS=Oryza sativa subsp. japonica GN=MFP PE=1 SV=2	0	5.99	2	1	3	1	726		8.55
High	Q8W3F9	Cellulose synthase-like protein D1 OS=Oryza sativa subsp. japonica GN=CSLD1 PE=2 SV=1	0.008	1.672	1	1	5	1	1127		6.91
High	Q93VI3	60S ribosomal protein L17-1 OS=Arabidopsis thaliana GN=RPL17A PE=1 SV=1	0.002	3.798	6	1	2	1	176		4.51
High	Q93VP3	Eukaryotic translation initiation factor 5A-2 OS=Arabidopsis thaliana GN=At1g26630 PE=1 SV=1	0	11.401	13	2	15	1	159		40.34
High	Q93VR3	GDP-mannose 3,5-epimerase OS=Arabidopsis thaliana GN=At5g28840 PE=1 SV=1	0.002	3.39	7	1	11	1	377		13.84
High	Q943F3	60S ribosomal protein L18a OS=Oryza sativa subsp. japonica GN=RPL18A PE=2 SV=1	0.002	3.041	6	1	3	1	178		1.64
High	Q944G9	Probable fructose-bisphosphate aldolase 2, chloroplastic OS=Arabidopsis thaliana GN=FBA2 PE=1 SV=2	0.002	4.432	8	2	4	1	398		8.99
High	Q949U7	Peroxiredoxin-2E, chloroplastic OS=Arabidopsis thaliana GN=PRXIIE PE=1 SV=2	0.006	1.822	7	1	1	1	234		1.84
High	Q94BZ7	DNA gyrase subunit B, mitochondrial OS=Arabidopsis thaliana GN=GYRBM PE=2 SV=1	0.003	2.378	1	1	2	1	732		1.72
High	Q94F49	Probable histone H2A.5 OS=Arabidopsis thaliana GN=At5g27670 PE=1 SV=1	0.002	3.049	21	2	2	1	150		1.62
High	Q96553	S-adenosylmethionine synthase 3 OS=Catharanthus roseus GN=SAMS3 PE=1 SV=1	0.002	5.335	6	3	5	1	390		5.57
High	Q9AT55	S-adenosylmethionine synthase 2 OS=Elaeagnus umbellata GN=SAMS2 PE=2 SV=1	0	8.437	6	2	3	1	393		8.5
High	Q9AXQ3	Eukaryotic translation initiation factor 5A-4 OS=Solanum lycopersicum PE=2 SV=1	0.002	4.52	12	3	9	1	160		0
High	Q9AYP4	40S ribosomal protein S10 OS=Oryza sativa subsp. japonica GN=RPS10 PE=2 SV=2	0.002	2.953	10	2	7	1	183		0
High	Q9FE01	L-ascorbate peroxidase 2, cytosolic OS=Oryza sativa subsp. japonica GN=APX2 PE=1 SV=1	0	6.688	6	1	20	1	251		53.48
High	Q9FF90	60S ribosomal protein L13-3 OS=Arabidopsis thaliana GN=RPL13D PE=2 SV=1	0	7.546	6	1	9	1	206		26.86
High	Q9FJE8	Probable histone H2A.7 OS=Arabidopsis thaliana GN=At5g59870 PE=1 SV=1	0.002	3.9	15	2	5	1	150		4.07
High	Q9FJI5	Glucose-6-phosphate 1-dehydrogenase, cytoplasmic isoform 2 OS=Arabidopsis thaliana GN=ACG12 PE=1 SV=1	0.002	4.506	4	3	10	1	515		5.02
High	Q9FJL3	Peptidyl-prolyl cis-trans isomerase FKBP65 OS=Arabidopsis thaliana GN=FKBP65 PE=1 SV=1	0.009	1.627	1	1	5	1	578		0
High	Q9FLP6	Small ubiquitin-related modifier 2 OS=Arabidopsis thaliana GN=SUMO2 PE=1 SV=1	0.002	5.165	16	1	9	1	103		19.55
High	Q9FLQ4	Dihydrolipoyllysine-residue succinyltransferase component of 2-oxoglutarate dehydrogenase complex 1, mitochondrial OS=Arabidopsis thaliana GN=At5g55070 PE=1 SV=1	0.002	4.061	2	1	9	1	464		21.6
High	Q9FM19	Hypersensitive-induced response protein 1 OS=Arabidopsis thaliana GN=HIR1 PE=1 SV=1	0.002	3.173	4	1	1	1	286		2.36
High	Q9FNP8	40S ribosomal protein S19-3 OS=Arabidopsis thaliana GN=RPS19C PE=2 SV=1	0	7.186	29	3	4	1	143		7.32
High	Q9FPT1	Ubiquitin carboxyl-terminal hydrolase 12 OS=Arabidopsis thaliana GN=UBP12 PE=1 SV=2	0.008	1.69	1	1	5	1	1116		0
High	Q9FZ27	Germin-like protein subfamily 2 member 2 OS=Arabidopsis thaliana GN=At1g02335 PE=2 SV=1	0	5.465	7	1	3	1	219		2.69
High	Q9LDQ7	S-adenosylmethionine synthase OS=Camellia sinensis GN=SAM PE=2 SV=1	0	5.692	7	2	3	1	393		2.61
High	Q9LEV3	CBS domain-containing protein CBSX3, mitochondrial OS=Arabidopsis thaliana GN=CBSX3 PE=1 SV=1	0.008	1.683	3	1	1	1	206		0
High	Q9LHA8	Probable mediator of RNA polymerase II transcription subunit 37c OS=Arabidopsis thaliana GN=MED37C PE=1 SV=1	0	9.107	7	4	15	1	650		24.66
High	Q9LHP1	60S ribosomal protein L7-4 OS=Arabidopsis thaliana GN=RPL7D PE=2 SV=1	0.003	2.336	5	1	1	1	244		0
High	Q9LIB2	Alpha-glucan phosphorylase 1 OS=Arabidopsis thaliana GN=PHS1 PE=1 SV=1	0	12.319	5	5	14	1	962		10.91
High	Q9LKA5	Uncharacterized protein At3g15000, mitochondrial OS=Arabidopsis thaliana GN=At3g15000 PE=1 SV=1	0.002	5.097	3	1	9	1	395		18.24
High	Q9LLC1	Biotin carboxyl carrier protein of acetyl-CoA carboxylase 2, chloroplastic OS=Arabidopsis thaliana GN=BCCP2 PE=1 SV=1	0.004	2.231	4	1	6	1	255		5.83
High	Q9LYK9	40S ribosomal protein S26-3 OS=Arabidopsis thaliana GN=RPS26C PE=2 SV=1	0	8.172	18	1	13	1	130		32.53
High	Q9LZF6	Cell division control protein 48 homolog E OS=Arabidopsis thaliana GN=CDC48E PE=1 SV=2	0	11.487	5	3	7	1	810		15.69
High	Q9LZH9	60S ribosomal protein L7a-2 OS=Arabidopsis thaliana GN=RPL7AB PE=1 SV=1	0	6.741	8	1	3	1	256		5.55
High	Q9LZS3	1,4-alpha-glucan-branching enzyme 2-2, chloroplastic/amyloplastic OS=Arabidopsis thaliana GN=SBE2.2 PE=1 SV=1	0.007	1.778	2	1	1	1	805		0
High	Q9M339	40S ribosomal protein S3-2 OS=Arabidopsis thaliana GN=RPS3B PE=1 SV=1	0.008	1.678	2	1	7	1	249		0
High	Q9M5L0	60S ribosomal protein L35 OS=Euphorbia esula GN=RPL35 PE=2 SV=1	0.003	2.404	7	1	5	1	123		6.43
High	Q9MB46	V-type proton ATPase subunit E OS=Citrus unshiu GN=VATE PE=2 SV=1	0.002	4.516	19	3	9	1	230		5.53
High	Q9S7C0	Heat shock 70 kDa protein 14 OS=Arabidopsis thaliana GN=HSP70-14 PE=1 SV=1	0.004	2.126	1	1	1	1	831		0
High	Q9S834	ATP-dependent Clp protease proteolytic subunit 5, chloroplastic OS=Arabidopsis thaliana GN=CLPP5 PE=1 SV=1	0.002	4.534	13	2	2	1	298		1.9
High	Q9SDD6	Peroxiredoxin-2F, mitochondrial OS=Oryza sativa subsp. japonica GN=PRXIIF PE=2 SV=1	0.002	3.114	8	1	1	1	198		2.39
High	Q9SE60	Methylenetetrahydrofolate reductase 1 OS=Arabidopsis thaliana GN=MTHFR1 PE=1 SV=1	0.005	1.936	3	1	2	1	592		1.82
High	Q9SF40	60S ribosomal protein L4-1 OS=Arabidopsis thaliana GN=RPL4A PE=2 SV=1	0.002	4.193	5	1	1	1	406		2.9
High	Q9SGA6	40S ribosomal protein S19-1 OS=Arabidopsis thaliana GN=RPS19A PE=2 SV=1	0.002	5.339	20	2	2	1	143		2.45
High	Q9SGC1	Probable phosphoglucomutase, cytoplasmic 2 OS=Arabidopsis thaliana GN=At1g70730 PE=1 SV=1	0	6.601	6	4	10	1	585		9.05
High	Q9SJD4	Long chain acyl-CoA synthetase 8 OS=Arabidopsis thaliana GN=LACS8 PE=2 SV=1	0.002	3.291	4	2	4	1	720		4.11
High	Q9SML8	Malate dehydrogenase, cytoplasmic OS=Beta vulgaris GN=NR1 PE=1 SV=1	0	9.415	22	4	8	1	332		9.9
High	Q9SNX2	Phosphoglucomutase, cytoplasmic OS=Bromus inermis GN=PGM1 PE=2 SV=1	0	41.275	9	5	22	1	581		104.02
High	Q9SSB5	26S protease regulatory subunit 7 homolog A OS=Arabidopsis thaliana GN=RPT1A PE=2 SV=1	0.003	2.551	4	1	1	1	426		0
High	Q9STX5	Endoplasmin homolog OS=Arabidopsis thaliana GN=SHD PE=1 SV=1	0	9.217	4	4	26	1	823		4.96
High	Q9SU63	Aldehyde dehydrogenase family 2 member B4, mitochondrial OS=Arabidopsis thaliana GN=ALDH2B4 PE=1 SV=1	0	11.44	3	1	9	1	538		36.38
High	Q9SXP2	Formate dehydrogenase 1, mitochondrial OS=Oryza sativa subsp. japonica GN=Os06g0486800 PE=1 SV=2	0	21.315	10	4	35	1	376		68.27
High	Q9SYM5	Probable rhamnose biosynthetic enzyme 1 OS=Arabidopsis thaliana GN=RHM1 PE=1 SV=1	0.004	2.016	1	1	1	1	669		2.23
High	Q9SYT0	Annexin D1 OS=Arabidopsis thaliana GN=ANN1 PE=1 SV=1	0.002	4.643	3	1	19	1	317		43.01
High	Q9SZX3	Argininosuccinate synthase, chloroplastic OS=Arabidopsis thaliana GN=At4g24830 PE=2 SV=3	0.002	3.97	4	2	5	1	494		3.65
High	Q9T043	60S ribosomal protein L14-2 OS=Arabidopsis thaliana GN=RPL14B PE=2 SV=1	0.002	4.167	11	1	2	1	134		2.71
High	Q9T0K5	Leucine-rich repeat extensin-like protein 3 OS=Arabidopsis thaliana GN=LRX3 PE=1 SV=1	0.003	2.469	2	1	2	1	760		4.97
High	Q9XEK8	60S ribosomal protein L23 OS=Tortula ruralis GN=RPL23 PE=2 SV=1	0	15.713	20	2	21	1	139		54.86
High	Q9XF91	Photosystem II 22 kDa protein, chloroplastic OS=Arabidopsis thaliana GN=PSBS PE=1 SV=1	0.002	3.021	6	1	1	1	265		2.5
High	Q9ZT91	Elongation factor Tu, mitochondrial OS=Arabidopsis thaliana GN=TUFA PE=1 SV=1	0.002	4.164	4	1	5	1	454		7.34
High	XP_020570576.1	uncharacterized protein LOC110017804 [Phalaenopsis equestris]	0.005	1.943	5	1	1	1	288	151.25
High	XP_020570606.1	LOW QUALITY PROTEIN: geranylgeranyl pyrophosphate synthase, chloroplastic/chromoplastic-like [Phalaenopsis equestris]	0.002	4.315	4	1	4	1	354	811.47
High	XP_020570641.1	probable pyridoxal 5'-phosphate synthase subunit PDX1 [Phalaenopsis equestris]	0.002	4.44	4	1	6	1	312	1136.22
High	XP_020571028.1	LOW QUALITY PROTEIN: dihydrolipoyllysine-residue acetyltransferase component 5 of pyruvate dehydrogenase complex, chloroplastic [Phalaenopsis equestris]	0.002	3.14	3	1	2	1	515	304.93
High	XP_020571043.1	cytosolic isocitrate dehydrogenase [NADP]-like [Phalaenopsis equestris]	0	18.518	13	5	24	1	504	4811.54
High	XP_020571125.1	serine hydroxymethyltransferase, mitochondrial [Phalaenopsis equestris]	0	11.855	11	3	10	1	520	1722.28	3.72
High	XP_020571225.1	sedoheptulose-1,7-bisphosphatase, chloroplastic [Phalaenopsis equestris]	0	12.964	9	3	9	1	391	1960.63
High	XP_020571332.1	caffeic acid 3-O-methyltransferase [Phalaenopsis equestris]	0.002	3.816	7	1	15	1	365		42.02
High	XP_020571348.1	subtilisin-like protease SBT1.4 [Phalaenopsis equestris]	0.003	2.585	1	1	2	1	805	379.96
High	XP_020571869.1	glucose-6-phosphate 1-dehydrogenase, cytoplasmic isoform-like [Phalaenopsis equestris]	0	37.924	20	8	53	1	526	10848.3	2.19
High	XP_020571966.1	T-complex protein 1 subunit gamma [Phalaenopsis equestris]	0	9.03	11	4	11	1	424	1976.08
High	XP_020572026.1	bibenzyl synthase [Phalaenopsis equestris]	0	11.281	14	3	11	1	390	2498.19	5.56
High	XP_020572229.1	LOW QUALITY PROTEIN: branched-chain-amino-acid aminotransferase 5, chloroplastic-like [Phalaenopsis equestris]	0.002	2.905	4	1	2	1	412	337.13
High	XP_020572361.1	chaperone protein ClpB3, mitochondrial-like [Phalaenopsis equestris]	0	11.656	4	3	13	1	969	2527.94
High	XP_020572372.1	S-formylglutathione hydrolase [Phalaenopsis equestris]	0	9.126	4	1	3	1	443	397.4	0
High	XP_020572414.1	small nuclear ribonucleoprotein SmD3b [Phalaenopsis equestris]	0.007	1.777	7	1	1	1	131	166.11
High	XP_020572444.1	ATP synthase subunit d, mitochondrial [Phalaenopsis equestris]	0	8.955	16	2	12	1	173	2271.09
High	XP_020572458.1	isoflavone reductase-like protein [Phalaenopsis equestris]	0	8.339	7	2	14	1	309	2917.64
High	XP_020572466.1	acetyl-CoA acetyltransferase, cytosolic 1-like [Phalaenopsis equestris]	0.003	2.485	7	1	3	1	407		4.29
High	XP_020572506.1	ATP-citrate synthase alpha chain protein 2 isoform X1 [Phalaenopsis equestris]	0.002	2.796	3	1	1	1	423	183.71
High	XP_020572558.1	probable enoyl-CoA hydratase 1, peroxisomal [Phalaenopsis equestris]	0.003	2.474	4	1	6	1	274	1040.68
High	XP_020572571.1	single-stranded DNA-binding protein WHY1, chloroplastic-like [Phalaenopsis equestris]	0	6.057	5	1	3	1	265	994.37
High	XP_020572664.1	mitochondrial dicarboxylate/tricarboxylate transporter DTC-like [Phalaenopsis equestris]	0	11.809	13	3	12	1	299	2605.73
High	XP_020572685.1	nucleoid-associated protein At2g24020, chloroplastic-like [Phalaenopsis equestris]	0.004	2.188	6	1	3	1	198	570.49
High	XP_020572787.1	malate dehydrogenase, chloroplastic [Phalaenopsis equestris]	0	40.608	22	7	52	1	412	8942.95	52.87
High	XP_020572831.1	V-type proton ATPase 16 kDa proteolipid subunit [Phalaenopsis equestris]	0.003	2.261	11	1	1	1	164	129.04
High	XP_020572866.1	coatomer subunit gamma-2 [Phalaenopsis equestris]	0.002	4.249	1	1	4	1	886	780.64
High	XP_020572956.1	ATP-citrate synthase beta chain protein 1 [Phalaenopsis equestris]	0	28.029	19	9	36	1	608	6809.39	11.32	Met-loss+Acetyl [N-Term]
High	XP_020572969.1	flavonoid 3'-monooxygenase-like [Phalaenopsis equestris]	0.002	2.627	2	1	2	1	603	407.17
High	XP_020572986.1	eukaryotic translation initiation factor 5A-2-like [Phalaenopsis equestris]	0	9.838	23	3	8	1	159	1634.48
High	XP_020573220.1	beta-adaptin-like protein C [Phalaenopsis equestris]	0.002	3.63	1	1	2	1	908	393.54
High	XP_020573223.1	monocopper oxidase-like protein SKU5 [Phalaenopsis equestris]	0.002	2.918	3	1	3	1	596	574.22
High	XP_020573273.1	26S proteasome non-ATPase regulatory subunit 8 homolog A-like [Phalaenopsis equestris]	0	5.705	6	1	6	1	267	1391.45
High	XP_020573294.1	succinate-semialdehyde dehydrogenase, mitochondrial [Phalaenopsis equestris]	0.003	2.334	5	1	1	1	522		3.18
High	XP_020573334.1	heavy metal-associated isoprenylated plant protein 39-like [Phalaenopsis equestris]	0.002	4.604	11	1	6	1	144	1390.69
High	XP_020573413.1	2-Cys peroxiredoxin BAS1, chloroplastic-like [Phalaenopsis equestris]	0.002	3.095	8	1	3	1	295		3.2
High	XP_020573422.1	uncharacterized protein LOC110019897 [Phalaenopsis equestris]	0.005	1.989	2	1	1	1	771	142.76
High	XP_020573586.1	long chain acyl-CoA synthetase 9, chloroplastic-like [Phalaenopsis equestris]	0.002	3.375	6	2	4	1	697	413.57	0
High	XP_020573587.1	probable L-ascorbate peroxidase 6, chloroplastic [Phalaenopsis equestris]	0	26.54	4	1	26	1	427	9300.34
High	XP_020574112.1	50S ribosomal protein L12, chloroplastic-like [Phalaenopsis equestris]	0.005	1.974	9	1	1	1	179	139.53
High	XP_020574160.1	aconitate hydratase, cytoplasmic-like isoform X1 [Phalaenopsis equestris]	0	46.608	14	10	66	1	980	9524.44	77.52
High	XP_020574193.1	glutathione S-transferase F12-like [Phalaenopsis equestris]	0.007	1.763	5	1	3	1	225	509.89
High	XP_020574257.1	oligouridylate-binding protein 1-like [Phalaenopsis equestris]	0.002	3.231	3	1	1	1	421	265.31
High	XP_020574269.1	NAD(P)H dehydrogenase (quinone) FQR1-like [Phalaenopsis equestris]	0.002	3.124	3	1	3	1	261	648.77
High	XP_020574316.1	prolycopene isomerase 2, chloroplastic [Phalaenopsis equestris]	0.006	1.875	2	1	1	1	587	167.26
High	XP_020574372.1	ubiquitin-conjugating enzyme E2 7-like isoform X2 [Phalaenopsis equestris]	0	16.54	43	4	19	1	168	2058.22	20.13
High	XP_020574378.1	putative phosphatidylglycerol/phosphatidylinositol transfer protein DDB_G0282179 [Phalaenopsis equestris]	0.002	2.964	11	1	4	1	155	461.08	0
High	XP_020574499.1	probable aquaporin PIP1-2 [Phalaenopsis equestris]	0	14.349	12	1	14	1	287		83.95
High	XP_020574595.1	LOW QUALITY PROTEIN: 3-ketoacyl-CoA thiolase 2, peroxisomal-like [Phalaenopsis equestris]	0	28.049	15	5	39	1	463	2717.01	71.4
High	XP_020574618.1	probable serine/threonine-protein kinase BSK3 [Phalaenopsis equestris]	0.002	2.772	4	1	5	1	494		10.35
High	XP_020574713.1	ubiquitin carboxyl-terminal hydrolase 2 [Phalaenopsis equestris]	0.003	2.397	3	1	4	1	334	683.97
High	XP_020574744.1	LOW QUALITY PROTEIN: probable linoleate 9S-lipoxygenase 5 [Phalaenopsis equestris]	0	10.874	3	3	36	1	883	6695.29
High	XP_020574849.1	dnaJ protein ERDJ3B [Phalaenopsis equestris]	0.002	3.747	3	1	2	1	343	408.43
High	XP_020574873.1	calreticulin-like [Phalaenopsis equestris]	0.002	3.804	5	2	12	1	415	1633.94	5.12
High	XP_020574937.1	RGG repeats nuclear RNA binding protein B-like, partial [Phalaenopsis equestris]	0.002	3.175	3	1	5	1	488	790.91
High	XP_020574950.1	reticulon-like protein B2 [Phalaenopsis equestris]	0.004	2.151	3	1	5	1	248	771.06
High	XP_020575013.1	UBX domain-containing protein 6 [Phalaenopsis equestris]	0.002	3.198	3	1	1	1	422	206.7
High	XP_020575018.1	villin-2-like isoform X1 [Phalaenopsis equestris]	0.002	2.943	1	1	4	1	977	564.55
High	XP_020575191.1	probable aldo-keto reductase 2 [Phalaenopsis equestris]	0	89.138	23	11	113	1	350	31468	0
High	XP_020575450.1	beta-glucosidase 2-like isoform X1 [Phalaenopsis equestris]	0	5.836	3	1	4	1	520	853.41
High	XP_020575540.1	uncharacterized protein LOC110021396 [Phalaenopsis equestris]	0.002	2.813	1	1	9	1	1307	1560.37
High	XP_020575884.1	actin-97-like [Phalaenopsis equestris]	0	92.932	44	15	126	1	377	11547.7	340.47
High	XP_020575969.1	glutamate--tRNA ligase, chloroplastic/mitochondrial isoform X1 [Phalaenopsis equestris]	0.002	3.159	2	1	1	1	574	215.47
High	XP_020575996.1	40S ribosomal protein S15 [Phalaenopsis equestris]	0	7.733	12	1	1	1	153	400.99
High	XP_020576280.1	signal peptidase complex catalytic subunit SEC11A-like [Phalaenopsis equestris]	0.003	2.252	7	1	1	1	180	173.14
High	XP_020576307.1	3-phosphoshikimate 1-carboxyvinyltransferase 2 [Phalaenopsis equestris]	0.004	2.064	2	1	2	1	527	292.62
High	XP_020576399.1	dynamin-related protein 5A [Phalaenopsis equestris]	0.002	4.268	2	1	1	1	609	228.28
High	XP_020576555.1	cytosolic enolase 3 [Phalaenopsis equestris]	0	5.77	4	2	3	1	476	488.53
High	XP_020576569.1	ubiquitin domain-containing protein DSK2b-like isoform X1 [Phalaenopsis equestris]	0.004	2.068	3	1	1	1	562	127.32
High	XP_020577283.1	glucose-6-phosphate 1-dehydrogenase, chloroplastic-like [Phalaenopsis equestris]	0.005	1.991	2	1	4	1	594	664.78
High	XP_020577428.1	universal stress protein PHOS32-like [Phalaenopsis equestris]	0	5.589	4	1	9	1	276	2676.61
High	XP_020577502.1	mitochondrial Rho GTPase 1 [Phalaenopsis equestris]	0.006	1.823	2	1	1	1	645	135.25
High	XP_020577536.1	alpha-soluble NSF attachment protein-like [Phalaenopsis equestris]	0.002	4.264	3	1	7	1	289	1537.16
High	XP_020577550.1	nuclear transcription factor Y subunit C-2-like [Phalaenopsis equestris]	0.004	2.038	5	1	1	1	252	134.92
High	XP_020577850.1	probable cinnamyl alcohol dehydrogenase 1 isoform X1 [Phalaenopsis equestris]	0.007	1.765	4	1	1	1	412	125.41
High	XP_020577878.1	CDGSH iron-sulfur domain-containing protein NEET [Phalaenopsis equestris]	0.002	4.827	11	1	6	1	114	1218.81
High	XP_020577971.1	protein FLX-like 2 [Phalaenopsis equestris]	0.003	2.247	3	1	3	1	434	468.13
High	XP_020577979.1	protein TIC 40, chloroplastic-like isoform X1 [Phalaenopsis equestris]	0.002	3.6	3	1	5	1	433	923.27
High	XP_020578131.1	mitochondrial import inner membrane translocase subunit TIM14-3-like isoform X1 [Phalaenopsis equestris]	0	10.026	17	1	4	1	112	1506.12		Met-loss+Acetyl [N-Term]
High	XP_020578176.1	uncharacterized protein LOC110023213 isoform X1 [Phalaenopsis equestris]	0.003	2.505	1	1	1	1	972	166.29
High	XP_020578337.1	protein transport protein SEC13 homolog B-like [Phalaenopsis equestris]	0.002	4.425	5	1	2	1	302	441.42
High	XP_020578436.1	chorismate mutase 1, chloroplastic [Phalaenopsis equestris]	0.002	3.058	3	1	9	1	316	1880.26
High	XP_020578469.1	uncharacterized protein LOC110023404 [Phalaenopsis equestris]	0.002	2.887	3	1	8	1	330	1344.63
High	XP_020578501.1	auxin-repressed 12.5 kDa protein-like [Phalaenopsis equestris]	0	8.549	14	1	4	1	126	811.53
High	XP_020578693.1	LOW QUALITY PROTEIN: elongation factor 1-gamma 2-like [Phalaenopsis equestris]	0	9.121	8	3	21	1	422	3734.48		Acetyl [N-Term]
High	XP_020578734.1	chlorophyll a-b binding protein 8, chloroplastic [Phalaenopsis equestris]	0.003	2.29	4	1	1	1	276	208.95
High	XP_020578960.1	threonine dehydratase biosynthetic, chloroplastic [Phalaenopsis equestris]	0.006	1.877	3	1	1	1	616		3.13
High	XP_020579239.1	peroxisomal adenine nucleotide carrier 1-like [Phalaenopsis equestris]	0.002	3.725	4	1	1	1	323	193.26
High	XP_020579309.1	enoyl-CoA hydratase 2, peroxisomal isoform X2 [Phalaenopsis equestris]	0.002	2.847	3	1	5	1	313	934.24
High	XP_020579636.1	leukotriene A-4 hydrolase homolog [Phalaenopsis equestris]	0.002	3.584	2	1	7	1	611	1512.3
High	XP_020579655.1	diaminopimelate epimerase, chloroplastic [Phalaenopsis equestris]	0.002	3.668	3	1	3	1	358	682.18
High	XP_020579683.1	60S ribosomal protein L9-like [Phalaenopsis equestris]	0	7.661	16	2	16	1	190	2492.97
High	XP_020579745.1	LOW QUALITY PROTEIN: perakine reductase-like [Phalaenopsis equestris]	0	5.659	5	1	1	1	350	320.72
High	XP_020579759.1	perakine reductase-like [Phalaenopsis equestris]	0.002	3.404	4	1	4	1	348	702.8
High	XP_020579771.1	fasciclin-like arabinogalactan protein 17 [Phalaenopsis equestris]	0.003	2.515	4	1	2	1	454	258.42
High	XP_020579870.1	proteasome subunit beta type-2-A-like [Phalaenopsis equestris]	0.002	4.811	8	1	8	1	199	1865.84
High	XP_020579882.1	probable ribose-5-phosphate isomerase 3, chloroplastic [Phalaenopsis equestris]	0.006	1.875	5	1	1	1	285	155.98
High	XP_020579920.1	elongation factor Ts, mitochondrial [Phalaenopsis equestris]	0.002	3.575	3	1	2	1	390	417.77
High	XP_020579990.1	cell division protein FtsZ homolog 1, chloroplastic [Phalaenopsis equestris]	0.002	4.675	5	1	1	1	408	240.17
High	XP_020580069.1	cysteine proteinase inhibitor 12-like [Phalaenopsis equestris]	0	9.003	7	1	12	1	243	3908.34
High	XP_020580072.1	uncharacterized protein LOC110024445 [Phalaenopsis equestris]	0.004	2.066	6	1	2	1	194	320.61
High	XP_020580155.1	probable glucan 1,3-alpha-glucosidase [Phalaenopsis equestris]	0.002	2.834	1	1	2	1	919	335.01
High	XP_020580264.1	peroxidase 51-like [Phalaenopsis equestris]	0.003	2.448	4	1	3	1	332	483.9
High	XP_020580342.1	sm-like protein LSM2 [Phalaenopsis equestris]	0.003	2.444	9	1	2	1	93	339.24
High	XP_020580638.1	60S ribosomal protein L17 [Phalaenopsis equestris]	0	15.69	19	3	15	1	184	2229.82	20.63
High	XP_020580794.1	succinate--CoA ligase [ADP-forming] subunit beta, mitochondrial-like [Phalaenopsis equestris]	0	28.533	25	6	36	1	360	5299.12	41.77
High	XP_020580873.1	4-alpha-glucanotransferase DPE1, chloroplastic/amyloplastic [Phalaenopsis equestris]	0.003	2.329	3	1	1	1	581	119.19
High	XP_020581014.1	isoamylase 3, chloroplastic [Phalaenopsis equestris]	0.003	2.418	3	1	7	1	776	580.66	0
High	XP_020581250.1	probable 4-hydroxy-tetrahydrodipicolinate reductase 1, chloroplastic isoform X2 [Phalaenopsis equestris]	0.006	1.806	3	1	1	1	333	120.11
High	XP_020581365.1	eukaryotic translation initiation factor 3 subunit B-like [Phalaenopsis equestris]	0.003	2.487	2	1	1	1	719	122.5
High	XP_020581398.1	calnexin homolog 1-like isoform X1 [Phalaenopsis equestris]	0	10.915	5	2	17	1	538	3875.93
High	XP_020581436.1	pyruvate kinase 1, cytosolic [Phalaenopsis equestris]	0	37.445	19	8	62	1	527	13285.4
High	XP_020581464.1	uncharacterized protein LOC110025362 [Phalaenopsis equestris]	0	27.192	20	6	38	1	440	7735.84	0
High	XP_020581477.1	uncharacterized protein LOC110025371 isoform X1 [Phalaenopsis equestris]	0.002	2.614	10	1	2	1	149	370.71
High	XP_020581593.1	monothiol glutaredoxin-S11 [Phalaenopsis equestris]	0.002	4.658	3	1	1	1	490	245.46
High	XP_020581608.1	AP-2 complex subunit alpha-1-like [Phalaenopsis equestris]	0.002	2.983	1	1	2	1	1020	382.26
High	XP_020581750.1	aconitate hydratase, cytoplasmic-like, partial [Phalaenopsis equestris]	0	34.013	11	9	56	1	938	9700.57	26.12
High	XP_020581769.1	peroxisomal fatty acid beta-oxidation multifunctional protein-like isoform X1 [Phalaenopsis equestris]	0.002	4.041	2	1	1	1	683	176.97
High	XP_020581782.1	NPL4-like protein 2 [Phalaenopsis equestris]	0.002	3.75	3	1	3	1	372	574.26
High	XP_020581860.1	ferritin-4, chloroplastic-like [Phalaenopsis equestris]	0.002	3.715	6	1	3	1	262	295.63	0
High	XP_020581938.1	pyruvate dehydrogenase E1 component subunit beta-1, mitochondrial-like [Phalaenopsis equestris]	0	11.917	7	2	16	1	377	3308.68
High	XP_020582045.1	acyl-CoA-binding protein [Phalaenopsis equestris]	0	8.487	22	2	16	1	89	3650.81
High	XP_020582059.1	pentatricopeptide repeat-containing protein At3g49240-like isoform X1 [Phalaenopsis equestris]	0.002	3.663	3	1	2	1	440	426.71
High	XP_020582087.1	uncharacterized protein LOC110025777 isoform X1 [Phalaenopsis equestris]	0.002	4.132	4	1	3	1	364	554.57
High	XP_020582090.1	ACT domain-containing protein ACR12-like isoform X1 [Phalaenopsis equestris]	0.002	3.493	3	1	5	1	296	945.94
High	XP_020582117.1	nucleolin 2-like isoform X1 [Phalaenopsis equestris]	0	6.124	3	1	9	1	686		37.33
High	XP_020582166.1	LOW QUALITY PROTEIN: chaperone protein ClpB3, chloroplastic-like [Phalaenopsis equestris]	0	19.102	8	4	15	1	775	3181.43
High	XP_020582174.1	eukaryotic translation initiation factor 3 subunit D-like [Phalaenopsis equestris]	0.002	4.918	2	1	9	1	478	2053.15
High	XP_020582241.1	T-complex protein 1 subunit beta isoform X1 [Phalaenopsis equestris]	0	41.339	26	8	40	1	527	8437.82	20.54
High	XP_020582275.1	KH domain-containing protein HEN4-like [Phalaenopsis equestris]	0.006	1.798	1	1	2	1	692	367.35
High	XP_020582347.1	sugar transporter ERD6-like 4 isoform X1 [Phalaenopsis equestris]	0.002	3.645	2	1	1	1	497	231.59
High	XP_020582388.1	N-terminal acetyltransferase A complex auxiliary subunit NAA15 isoform X1 [Phalaenopsis equestris]	0.006	1.887	1	1	1	1	902	146.41
High	XP_020582405.1	20 kDa chaperonin, chloroplastic [Phalaenopsis equestris]	0.004	2.111	4	1	4	1	257	449.92
High	XP_020582435.1	60S ribosomal protein L27a-3 [Phalaenopsis equestris]	0	6.514	9	1	8	1	149	1222.53
High	XP_020582440.1	ABC transporter F family member 3 isoform X1 [Phalaenopsis equestris]	0.002	2.8	2	1	2	1	719	366.15
High	XP_020582514.1	translin [Phalaenopsis equestris]	0.003	2.26	3	1	2	1	310	339.62
High	XP_020583195.1	ubiquitin-activating enzyme E1 1-like [Phalaenopsis equestris]	0.002	4.708	2	1	9	1	1267		31.74
High	XP_020583209.1	ERBB-3 BINDING PROTEIN 1 [Phalaenopsis equestris]	0.002	5.394	6	2	12	1	395	2036.8
High	XP_020583369.1	sucrose synthase 4-like [Phalaenopsis equestris]	0	45.339	11	7	57	1	806	14047
High	XP_020583462.1	LOW QUALITY PROTEIN: uncharacterized protein LOC110026724 [Phalaenopsis equestris]	0.002	3.838	3	1	2	1	473	413.86
High	XP_020583478.1	translationally-controlled tumor protein homolog [Phalaenopsis equestris]	0.003	2.568	5	1	8	1	168	1607.25
High	XP_020583492.1	ubiquitin receptor RAD23d-like isoform X1 [Phalaenopsis equestris]	0	5.947	5	1	13	1	405		35.11
High	XP_020583648.1	caffeic acid 3-O-methyltransferase-like [Phalaenopsis equestris]	0.006	1.809	4	1	1	1	357	73.04
High	XP_020583842.1	LOW QUALITY PROTEIN: threonine synthase, chloroplastic-like, partial [Phalaenopsis equestris]	0.002	4.706	2	1	4	1	553	868.55
High	XP_020583941.1	serine/arginine-rich splicing factor RS31 [Phalaenopsis equestris]	0.002	4.442	6	1	1	1	243	263
High	XP_020583951.1	pyrophosphate--fructose 6-phosphate 1-phosphotransferase subunit alpha [Phalaenopsis equestris]	0.004	2.191	1	1	2	1	617	395.26
High	XP_020584041.1	28 kDa ribonucleoprotein, chloroplastic-like [Phalaenopsis equestris]	0.003	2.705	5	1	1	1	310	182.58
High	XP_020584087.1	DEAD-box ATP-dependent RNA helicase 8-like [Phalaenopsis equestris]	0.003	2.311	4	1	4	1	488	600.65
High	XP_020584183.1	uncharacterized protein At2g34160-like [Phalaenopsis equestris]	0.003	2.364	6	1	5	1	160	995.39
High	XP_020584204.1	26S proteasome regulatory subunit RPN13 [Phalaenopsis equestris]	0.002	4.229	5	1	2	1	330	318.32
High	XP_020584248.1	DNA-directed RNA polymerases II, IV and V subunit 8B-like [Phalaenopsis equestris]	0.002	5.271	9	1	1	1	146	291.16		Acetyl [N-Term]
High	XP_020584290.1	heat shock protein 81-1-like [Phalaenopsis equestris]	0	119.584	24	17	135	1	698	31175.5	50.05
High	XP_020584322.1	probable methylenetetrahydrofolate reductase [Phalaenopsis equestris]	0.004	2.152	3	1	2	1	594	243.64
High	XP_020584513.1	cytochrome c1-2, heme protein, mitochondrial [Phalaenopsis equestris]	0.002	4.097	8	1	8	1	310		27.28
High	XP_020584657.1	probable phospholipid hydroperoxide glutathione peroxidase isoform X1 [Phalaenopsis equestris]	0.002	3.34	5	1	8	1	199	1472.63
High	XP_020584659.1	3-isopropylmalate dehydratase large subunit, chloroplastic [Phalaenopsis equestris]	0	8.694	11	3	8	1	510	1265.91	0
High	XP_020584709.1	polyphenol oxidase, chloroplastic-like [Phalaenopsis equestris]	0.002	3.617	1	1	6	1	550	1200.73
High	XP_020584824.1	LOW QUALITY PROTEIN: protein TOC75-3, chloroplastic-like [Phalaenopsis equestris]	0.003	2.236	2	1	4	1	813	654.54
High	XP_020584867.1	phosphoenolpyruvate carboxykinase (ATP) [Phalaenopsis equestris]	0	14.509	8	4	12	1	686	1997.07
High	XP_020584914.1	heterogeneous nuclear ribonucleoprotein 1-like isoform X1 [Phalaenopsis equestris]	0.003	2.395	4	1	7	1	411	1116.65
High	XP_020584917.1	chorismate synthase, chloroplastic [Phalaenopsis equestris]	0	5.961	4	1	3	1	452	739.94
High	XP_020585101.1	probable nucleolar protein 5-2 [Phalaenopsis equestris]	0	7.551	7	2	4	1	660	589.89	5.81
High	XP_020585132.1	peptidyl-prolyl cis-trans isomerase FKBP12 [Phalaenopsis equestris]	0	6.535	14	1	9	1	113	1563.62
High	XP_020585262.1	40S ribosomal protein S10-1-like [Phalaenopsis equestris]	0	18.711	26	4	25	1	182	5081.16	0
High	XP_020585371.1	nucleolin isoform X1 [Phalaenopsis equestris]	0.002	2.832	1	1	9	1	776	1741.13
High	XP_020585446.1	tropinone reductase homolog At5g06060-like [Phalaenopsis equestris]	0.006	1.868	3	1	3	1	268	481.87
High	XP_020585545.1	3-dehydroquinate synthase, chloroplastic [Phalaenopsis equestris]	0.002	3.984	3	1	4	1	447	918.65
High	XP_020585580.1	uridine 5'-monophosphate synthase [Phalaenopsis equestris]	0.002	3.775	3	1	3	1	547	608.11
High	XP_020585816.1	fumarate hydratase 1, mitochondrial [Phalaenopsis equestris]	0.002	5.156	8	1	5	1	498		8.73
High	XP_020585870.1	acyl-coenzyme A oxidase 4, peroxisomal-like [Phalaenopsis equestris]	0.002	5.423	5	1	3	1	441	567.09
High	XP_020585938.1	cationic peroxidase 1-like [Phalaenopsis equestris]	0	8.57	13	2	14	1	322	1361.7	17.47
High	XP_020586088.1	phosphoglucomutase, cytoplasmic [Phalaenopsis equestris]	0	14.736	7	5	30	1	583	5808.82
High	XP_020586383.1	eukaryotic translation initiation factor 3 subunit F [Phalaenopsis equestris]	0.002	4.225	5	1	3	1	285	585.23
High	XP_020586394.1	agmatine deiminase [Phalaenopsis equestris]	0	6.208	3	1	9	1	394	2533.84
High	XP_020586440.1	3-isopropylmalate dehydrogenase 2, chloroplastic-like [Phalaenopsis equestris]	0.002	4.514	3	1	9	1	407	2045.36
High	XP_020586460.1	peroxidase 5-like [Phalaenopsis equestris]	0.002	5.249	9	2	2	1	299	374.97
High	XP_020586482.1	putative germin-like protein 2-1 [Phalaenopsis equestris]	0.005	1.954	4	1	6	1	224	1000.67
High	XP_020586502.1	cyanogenic beta-glucosidase-like isoform X1 [Phalaenopsis equestris]	0	8.654	5	2	12	1	448	2513.6
High	XP_020586721.1	protein CutA 1, chloroplastic [Phalaenopsis equestris]	0.002	3.067	5	1	2	1	198	388.55
High	XP_020586746.1	uncharacterized oxidoreductase At4g09670-like [Phalaenopsis equestris]	0	5.805	4	1	4	1	359	770.37
High	XP_020586796.1	probable phospholipid hydroperoxide glutathione peroxidase [Phalaenopsis equestris]	0.002	4.645	6	1	8	1	170	1407.36
High	XP_020586829.1	ESCRT-related protein CHMP1-like [Phalaenopsis equestris]	0.002	3.309	4	1	2	1	204	345.01
High	XP_020586832.1	serine/arginine-rich SC35-like splicing factor SCL28 isoform X1 [Phalaenopsis equestris]	0.002	2.837	5	1	2	1	230	328.54
High	XP_020586873.1	probable NADH dehydrogenase [ubiquinone] 1 alpha subcomplex subunit 5, mitochondrial [Phalaenopsis equestris]	0.002	3.971	10	1	4	1	171	946.81
High	XP_020587047.1	T-complex protein 1 subunit theta [Phalaenopsis equestris]	0	24.317	14	5	30	1	544	5758.75	16.69
High	XP_020587126.1	glycine-rich RNA-binding protein RZ1C-like [Phalaenopsis equestris]	0	5.79	4	1	10	1	306	2944.76
High	XP_020587178.1	40S ribosomal protein S27-2-like [Phalaenopsis equestris]	0.006	1.811	9	1	1	1	86	174.51
High	XP_020587202.1	mitochondrial dicarboxylate/tricarboxylate transporter DTC-like [Phalaenopsis equestris]	0	8.742	8	2	14	1	299	2822.44
High	XP_020587204.1	peroxidase P7-like [Phalaenopsis equestris]	0	10.954	9	2	9	1	318	2713.84
High	XP_020587226.1	40S ribosomal protein S16-like [Phalaenopsis equestris]	0.002	4.388	10	1	1	1	146	285.87
High	XP_020587228.1	signal recognition particle 9 kDa protein [Phalaenopsis equestris]	0.002	5.328	12	1	7	1	103	1655.85
High	XP_020587384.1	KH domain-containing protein At4g18375 isoform X1 [Phalaenopsis equestris]	0	15.508	4	3	19	1	614	4262.36
High	XP_020587870.1	aspartate aminotransferase, mitochondrial [Phalaenopsis equestris]	0.002	4.658	4	1	9	1	428	1920.17
High	XP_020587963.1	temperature-induced lipocalin-1-like [Phalaenopsis equestris]	0.006	1.829	4	1	1	1	189	166.55
High	XP_020588027.1	photosystem I reaction center subunit N, chloroplastic [Phalaenopsis equestris]	0.007	1.762	13	1	1	1	173		3.07
High	XP_020588120.1	translocase of chloroplast 34, chloroplastic-like [Phalaenopsis equestris]	0.003	2.514	5	1	1	1	312	141.86
High	XP_020588123.1	NADH dehydrogenase [ubiquinone] iron-sulfur protein 1, mitochondrial [Phalaenopsis equestris]	0.002	3.577	2	1	2	1	743	405.35
High	XP_020588206.1	putative 4-hydroxy-4-methyl-2-oxoglutarate aldolase 1 [Phalaenopsis equestris]	0.004	2.107	7	1	4	1	168	727.69
High	XP_020588497.1	oligouridylate-binding protein 1-like isoform X1 [Phalaenopsis equestris]	0.002	2.884	3	1	2	1	440	428.67
High	XP_020588661.1	dihydrolipoyl dehydrogenase, mitochondrial-like [Phalaenopsis equestris]	0	10.444	13	4	13	1	503	2599.87	5.71
High	XP_020588664.1	stress-response A/B barrel domain-containing protein HS1 [Phalaenopsis equestris]	0.002	3.322	8	1	9	1	109	1958.09		Acetyl [N-Term]
High	XP_020588677.1	annexin D1-like [Phalaenopsis equestris]	0.002	3.004	3	1	15	1	316	3292.29
High	XP_020588706.1	aldo-keto reductase family 4 member C9-like [Phalaenopsis equestris]	0	9.766	12	3	14	1	310	2337.06
High	XP_020588716.1	phosphoglycerate kinase, chloroplastic, partial [Phalaenopsis equestris]	0	44.574	26	7	55	1	390	12542.9	0
High	XP_020588757.1	heterogeneous nuclear ribonucleoprotein A3 homolog 2 [Phalaenopsis equestris]	0	6.161	4	1	7	1	356	969.09
High	XP_020588767.1	vacuolar protein sorting-associated protein 32 homolog 2-like [Phalaenopsis equestris]	0.006	1.883	7	1	1	1	219	140.08
High	XP_020588902.1	serine hydroxymethyltransferase 4-like [Phalaenopsis equestris]	0	27.07	22	6	22	1	471	4917.19	6.37	Acetyl [N-Term]
High	XP_020588936.1	V-type proton ATPase subunit D [Phalaenopsis equestris]	0.002	3.764	5	1	1	1	265	215.53
High	XP_020589502.1	60S ribosomal protein L32-1 [Phalaenopsis equestris]	0	14.001	20	3	18	1	133	3988.65
High	XP_020589527.1	eukaryotic translation initiation factor 2 subunit gamma-like [Phalaenopsis equestris]	0.002	2.852	7	1	1	1	468		4.26
High	XP_020589569.1	pathogenesis-related protein 1-like [Phalaenopsis equestris]	0	11.772	17	3	18	1	157	4164.47		Met-loss+Acetyl [N-Term]; Acetyl [N-Term]
High	XP_020589591.1	uncharacterized protein LOC110030935 [Phalaenopsis equestris]	0.003	2.712	7	1	6	1	155	1022.75
High	XP_020589601.1	peptidyl-prolyl cis-trans isomerase-like [Phalaenopsis equestris]	0.003	2.582	5	1	6	1	256	874.63
High	XP_020589605.1	wound-induced basic protein [Phalaenopsis equestris]	0.002	3.153	23	1	9	1	47	1889.54
High	XP_020589656.1	26S protease regulatory subunit S10B homolog B [Phalaenopsis equestris]	0	29.127	19	6	42	1	398	10015.3
High	XP_020589727.1	DNA repair RAD52-like protein 1, mitochondrial [Phalaenopsis equestris]	0.003	2.476	6	1	1	1	186	184.04
High	XP_020589765.1	nascent polypeptide-associated complex subunit alpha-like protein 1 [Phalaenopsis equestris]	0	23.201	16	3	27	1	201	6721.82		Acetyl [N-Term]
High	XP_020589910.1	LOW QUALITY PROTEIN: 60S ribosomal protein L17-like [Phalaenopsis equestris]	0	15.511	19	3	11	1	183	2593.17
High	XP_020589921.1	annexin D1-like [Phalaenopsis equestris]	0	10.483	12	3	32	1	316	6752.2
High	XP_020589946.1	60S ribosomal protein L27-like [Phalaenopsis equestris]	0.002	2.808	8	1	3	1	135	577.15
High	XP_020590013.1	2-alkenal reductase (NADP(+)-dependent)-like [Phalaenopsis equestris]	0	6.41	7	1	9	1	345		47.86
High	XP_020590033.1	LOW QUALITY PROTEIN: protein FLX-like 3 [Phalaenopsis equestris]	0.002	4.926	3	1	5	1	280	1005.71
High	XP_020590068.1	uncharacterized protein LOC110031286 isoform X1 [Phalaenopsis equestris]	0.002	3.33	5	1	2	1	227	391.04
High	XP_020590146.1	universal stress protein PHOS34-like [Phalaenopsis equestris]	0.002	3.181	20	1	2	1	92	341.09
High	XP_020590204.1	S-adenosylmethionine synthase 5-like [Phalaenopsis equestris]	0	34.861	22	8	36	1	394	5611.9	17.69
High	XP_020590230.1	glucose-6-phosphate isomerase, cytosolic isoform X1 [Phalaenopsis equestris]	0	14.975	7	4	27	1	650	5429.77
High	XP_020590240.1	5'-methylthioadenosine/S-adenosylhomocysteine nucleosidase 2-like [Phalaenopsis equestris]	0.002	3.347	5	1	1	1	274	222.94
High	XP_020590452.1	proteasome subunit alpha type-4 [Phalaenopsis equestris]	0.004	2.077	4	1	2	1	250	352.05
High	XP_020590453.1	mitochondrial pyruvate carrier 1 [Phalaenopsis equestris]	0.004	2.205	9	1	6	1	106	831.13
High	XP_020590538.1	ATP-sulfurylase 3, chloroplastic-like [Phalaenopsis equestris]	0.005	1.978	2	1	1	1	465	205.58
High	XP_020591021.1	probable L-ascorbate peroxidase 4 [Phalaenopsis equestris]	0.007	1.759	7	1	1	1	289	106.18
High	XP_020591064.1	glycine-rich RNA-binding protein 3, mitochondrial-like [Phalaenopsis equestris]	0.004	2.04	8	1	9	1	350		26
High	XP_020591077.1	MADS-box transcription factor 14-like [Phalaenopsis equestris]	0.005	1.931	11	1	2	1	167	443.26
High	XP_020591121.1	60S ribosomal protein L13a-2 [Phalaenopsis equestris]	0	8.276	10	2	5	1	206	1139.5
High	XP_020591205.1	malate synthase, glyoxysomal [Phalaenopsis equestris]	0.002	3.956	4	2	5	1	557	850.73
High	XP_020591214.1	histone H4-like [Phalaenopsis equestris]	0	58.274	60	10	84	1	103	19464.9
High	XP_020591276.1	eukaryotic translation initiation factor 3 subunit A [Phalaenopsis equestris]	0.002	4.964	2	1	1	1	968	274.91
High	XP_020591288.1	F-box/FBD/LRR-repeat protein At1g78750-like [Phalaenopsis equestris]	0.006	1.832	4	1	1	1	504	83.36
High	XP_020591291.1	heterogeneous nuclear ribonucleoprotein 1 [Phalaenopsis equestris]	0	14.905	9	3	20	1	360	5096.17
High	XP_020591297.1	multiple organellar RNA editing factor 9, chloroplastic [Phalaenopsis equestris]	0.002	3.224	7	1	1	1	244	135.95
High	XP_020591311.1	glucose-6-phosphate/phosphate translocator 2, chloroplastic-like [Phalaenopsis equestris]	0.002	2.893	3	1	3	1	394	463.82
High	XP_020591337.1	tryptophan synthase beta chain 1 [Phalaenopsis equestris]	0.002	3.985	4	1	4	1	472	686.84
High	XP_020591467.1	LOW QUALITY PROTEIN: urease accessory protein G [Phalaenopsis equestris]	0	10.638	15	3	12	1	277	2128.03
High	XP_020591581.1	limonoid UDP-glucosyltransferase-like [Phalaenopsis equestris]	0.002	4.121	3	1	1	1	475	223.56
High	XP_020591617.1	uncharacterized protein LOC110032359 [Phalaenopsis equestris]	0	5.952	16	1	10	1	79	2025.08
High	XP_020591619.1	eukaryotic translation initiation factor 2 subunit beta-like [Phalaenopsis equestris]	0.002	3.349	6	1	3	1	270	530.93
High	XP_020591641.1	2,3-bisphosphoglycerate-independent phosphoglycerate mutase [Phalaenopsis equestris]	0	23.876	11	6	41	1	559	7360.35	20.75
High	XP_020591954.1	proline synthase co-transcribed bacterial homolog protein-like isoform X1 [Phalaenopsis equestris]	0.004	2.034	4	1	3	1	253	470.98
High	XP_020592006.1	protein FLX-like 1 [Phalaenopsis equestris]	0.002	3.989	5	1	3	1	322	687.87
High	XP_020592238.1	probable NAD(P)H dehydrogenase (quinone) FQR1-like 1 [Phalaenopsis equestris]	0.002	3.898	5	1	10	1	224	2034.94
High	XP_020592272.1	cinnamoyl-CoA reductase 1-like [Phalaenopsis equestris]	0.002	3.126	3	1	8	1	325	1532.08
High	XP_020592354.1	ubiquitin-like protein 5 [Phalaenopsis equestris]	0.002	3.862	12	1	5	1	73	1265.37
High	XP_020592650.1	embryo-specific protein ATS3A-like [Phalaenopsis equestris]	0.002	2.894	10	1	5	1	199	862.86
High	XP_020592671.1	nudix hydrolase 19, chloroplastic [Phalaenopsis equestris]	0	6.742	4	1	3	1	387	749.97
High	XP_020592692.1	biotin carboxylase 1, chloroplastic isoform X1 [Phalaenopsis equestris]	0	22.174	22	6	30	1	535	4174.36	32.64
High	XP_020593094.1	cytochrome b-c1 complex subunit Rieske-4, mitochondrial-like [Phalaenopsis equestris]	0.005	1.967	4	1	1	1	273	191.07
High	XP_020593163.1	probable voltage-gated potassium channel subunit beta [Phalaenopsis equestris]	0.005	1.973	5	1	2	1	328	276.22
High	XP_020593205.1	uncharacterized protein LOC110033530 [Phalaenopsis equestris]	0	18.687	20	2	24	1	135	6079.9
High	XP_020593264.1	glutaredoxin [Phalaenopsis equestris]	0.002	2.751	9	1	9	1	108	1508.52
High	XP_020593348.1	acetolactate synthase small subunit 2, chloroplastic-like isoform X1 [Phalaenopsis equestris]	0.006	1.849	2	1	3	1	486	460.08
High	XP_020593455.1	40S ribosomal protein S4 [Phalaenopsis equestris]	0	10.78	11	3	19	1	264	4021.27
High	XP_020593480.1	LOW QUALITY PROTEIN: probable acyl-activating enzyme 5, peroxisomal [Phalaenopsis equestris]	0.002	4.21	3	1	5	1	565	935.01
High	XP_020593505.1	40S ribosomal protein S12-like [Phalaenopsis equestris]	0.002	3.673	12	1	2	1	138	433.08
High	XP_020593560.1	protochlorophyllide reductase-like isoform X1 [Phalaenopsis equestris]	0.004	2.121	5	1	1	1	419	131
High	XP_020593677.1	peptidyl-prolyl cis-trans isomerase 1-like [Phalaenopsis equestris]	0.002	4.333	9	2	10	1	174	1830.94
High	XP_020593918.1	elongation factor 2 [Phalaenopsis equestris]	0	139.396	32	19	169	1	843	28734.2	317.35
High	XP_020593924.1	40S ribosomal protein S24-1 [Phalaenopsis equestris]	0.004	2.071	11	1	1	1	138	123.39
High	XP_020593968.1	reactive Intermediate Deaminase A, chloroplastic [Phalaenopsis equestris]	0	23.099	26	5	37	1	185	7819.28
High	XP_020594012.1	protein translation factor SUI1 homolog 1-like [Phalaenopsis equestris]	0.002	3.298	12	1	7	1	113	1274.24
High	XP_020594226.1	60S ribosomal protein L18-2-like [Phalaenopsis equestris]	0	22.304	53	7	27	1	134	1882	25.22
High	XP_020595115.1	4-coumarate--CoA ligase-like 5 [Phalaenopsis equestris]	0.006	1.785	3	1	6	1	398	971.46
High	XP_020595124.1	glutathione S-transferase U19-like [Phalaenopsis equestris]	0.003	2.494	5	1	4	1	222	674.51
High	XP_020595327.1	peroxisomal fatty acid beta-oxidation multifunctional protein-like, partial [Phalaenopsis equestris]	0.004	2.029	3	1	5	1	338	831.29
High	XP_020595358.1	actin-depolymerizing factor 7-like [Phalaenopsis equestris]	0	31.051	23	6	38	1	139	8438.84
High	XP_020595445.1	importin subunit alpha-1-like isoform X2 [Phalaenopsis equestris]	0	12.058	5	2	15	1	538	3662.67
High	XP_020595490.1	60S ribosomal protein L38-like [Phalaenopsis equestris]	0	11.59	22	1	10	1	69	3385.52
High	XP_020595618.1	60S ribosomal protein L26-2-like [Phalaenopsis equestris]	0.002	2.969	13	1	7	1	151	798.8	1.88
High	XP_020595813.1	mitochondrial import inner membrane translocase subunit TIM10 [Phalaenopsis equestris]	0.002	5.066	19	1	5	1	83	953.47
High	XP_020596065.1	3-ketoacyl-CoA thiolase 2, peroxisomal-like [Phalaenopsis equestris]	0	14.693	8	2	17	1	450	2957.31	14.22
High	XP_020596140.1	putative glucuronosyltransferase PGSIP8 [Phalaenopsis equestris]	0.007	1.762	2	1	5	1	474	903.83
High	XP_020596198.1	subtilisin-like protease SBT3.4 [Phalaenopsis equestris]	0.002	3.971	10	1	8	1	124	1534.29
High	XP_020596276.1	transketolase, chloroplastic-like [Phalaenopsis equestris]	0	20.564	9	4	28	1	744	747.99	71.49
High	XP_020596660.1	40S ribosomal protein S10-1-like [Phalaenopsis equestris]	0	14.443	26	4	20	1	179	3739.94	0
High	XP_020596712.1	dnaJ homolog subfamily B member 4-like [Phalaenopsis equestris]	0.002	3.223	5	1	1	1	346	181.7
High	XP_020596738.1	probable V-type proton ATPase subunit d [Phalaenopsis equestris]	0.002	3.076	4	1	1	1	351	251.39
High	XP_020596833.1	DNA-binding protein DDB_G0278111 isoform X2 [Phalaenopsis equestris]	0.003	2.237	8	1	2	1	128	302.93		Acetyl [N-Term]
High	XP_020596891.1	ER membrane protein complex subunit 8/9 homolog [Phalaenopsis equestris]	0.002	3.31	6	1	1	1	207	166.36
High	XP_020596943.1	serpin-Z1C-like [Phalaenopsis equestris]	0.002	3.828	3	1	4	1	379	992.86
High	XP_020596962.1	glyceraldehyde-3-phosphate dehydrogenase B, chloroplastic-like [Phalaenopsis equestris]	0	10.625	7	2	6	1	443	1146.46	0
High	XP_020597391.1	probable fructokinase-1 isoform X1 [Phalaenopsis equestris]	0	26.192	21	6	42	1	327	9821.19
High	XP_020597565.1	polygalacturonase inhibitor 2-like [Phalaenopsis equestris]	0.002	3.561	3	1	5	1	342	786.72
High	XP_020597617.1	cullin-1 isoform X1 [Phalaenopsis equestris]	0.002	3.988	2	1	1	1	744	214.84
High	XP_020597779.1	adagio-like protein 3 [Phalaenopsis equestris]	0.007	1.748	2	1	1	1	622	147.94
High	XP_020598073.1	chlorophyll a-b binding protein of LHCII type 1-like [Phalaenopsis equestris]	0	6.785	18	3	13	1	265	2110.53	2.57
High	XP_020598128.1	pyruvate dehydrogenase E1 component subunit beta [Phalaenopsis equestris]	0.004	2.174	2	1	4	1	403	624.5
High	XP_020598454.1	31 kDa ribonucleoprotein, chloroplastic-like, partial [Phalaenopsis equestris]	0	14.256	33	2	25	1	102	5432.59	11.86
High	XP_020598662.1	ornithine aminotransferase, mitochondrial [Phalaenopsis equestris]	0.002	2.811	3	1	1	1	470	211.47
High	XP_020598673.1	uncharacterized protein LOC110038244 [Phalaenopsis equestris]	0.002	5.14	11	2	15	1	283	161.29	37.42
High	XP_020598784.1	LOW QUALITY PROTEIN: probable cinnamyl alcohol dehydrogenase 6 [Phalaenopsis equestris]	0.002	5.005	4	1	2	1	364	452.13
High	XP_020598931.1	LOW QUALITY PROTEIN: stem-specific protein TSJT1-like [Phalaenopsis equestris]	0.004	2.093	3	1	9	1	242	1749.33		Acetyl [N-Term]
High	XP_020599266.1	oxysterol-binding protein-related protein 3A-like [Phalaenopsis equestris]	0.002	2.622	2	1	2	1	455	382.49
High	XP_020599282.1	V-type proton ATPase subunit C [Phalaenopsis equestris]	0.002	4.555	5	1	3	1	375	538.88
High	XP_020599633.1	RNA-binding protein 2-like isoform X1 [Phalaenopsis equestris]	0.002	3.587	5	1	3	1	260	624.1
High	XP_020599677.1	ATPase GET3-like [Phalaenopsis equestris]	0.002	4.629	3	1	4	1	349	999.93
High	XP_020599716.1	isocitrate dehydrogenase [NAD] regulatory subunit 1, mitochondrial isoform X1 [Phalaenopsis equestris]	0	10.924	11	3	12	1	387	2349
High	XP_020599736.1	uncharacterized protein LOC110039118 [Phalaenopsis equestris]	0	8.119	9	1	10	1	218	2336.12	0
High	XP_020599773.1	peroxisomal (S)-2-hydroxy-acid oxidase [Phalaenopsis equestris]	0	9.929	14	3	4	1	368	645.64	2.07
High	XP_020599951.1	FK506-binding protein 2-like isoform X1 [Phalaenopsis equestris]	0.002	4.899	9	1	5	1	152	1250.13
High	XP_020600063.1	pentatricopeptide repeat-containing protein At4g31850, chloroplastic [Phalaenopsis equestris]	0.004	2.146	1	1	1	1	1110	192.55
High	XP_020600089.1	basic 7S globulin-like [Phalaenopsis equestris]	0.002	4.462	2	1	8	1	510	1658.22
High	XP_020600164.1	actin-depolymerizing factor 11-like [Phalaenopsis equestris]	0.002	3.568	8	1	7	1	145	1539.79
High	XP_020600351.1	DNA-(apurinic or apyrimidinic site) lyase, chloroplastic [Phalaenopsis equestris]	0.006	1.816	2	1	2	1	495	352.26		Acetyl [N-Term]
High	XP_020672392.1	acetyl-CoA carboxylase 1 [Dendrobium catenatum]	0	30.663	6	8	12	1	2263	2259.21	2.4
High	XP_020672469.1	serine/arginine-rich splicing factor SR34A isoform X1 [Dendrobium catenatum]	0	6.767	6	1	1	1	287	331.34
High	XP_020672586.1	dicarboxylate transporter 2.1, chloroplastic [Dendrobium catenatum]	0.002	2.758	2	1	2	1	557	385.27
High	XP_020672589.1	histone H3.3 [Dendrobium catenatum]	0	22.951	32	3	27	1	136	2713.67	44.42
High	XP_020672620.1	proteasome subunit beta type-2-A-like [Dendrobium catenatum]	0.004	2.105	5	1	1	1	199	161.79
High	XP_020672668.1	stem-specific protein TSJT1 [Dendrobium catenatum]	0	10.203	7	1	9	1	251	1275.21
High	XP_020672680.1	RNA-binding protein 38 isoform X1 [Dendrobium catenatum]	0.006	1.819	3	1	1	1	292	158.13
High	XP_020673671.1	hydroxyphenylpyruvate reductase-like [Dendrobium catenatum]	0.007	1.781	3	1	2	1	316	372.59
High	XP_020673777.2	ABC transporter C family member 2 [Dendrobium catenatum]	0.006	1.815	1	1	1	1	1621		3.01
High	XP_020674127.1	28 kDa ribonucleoprotein, chloroplastic [Dendrobium catenatum]	0	14.286	7	2	28	1	347	6853.39
High	XP_020674512.1	uncharacterized protein LOC110093840 [Dendrobium catenatum]	0.002	3.924	8	1	4	1	142	917.31
High	XP_020674790.1	dynamin-2A-like [Dendrobium catenatum]	0.002	2.957	1	1	1	1	925	203.22
High	XP_020674864.1	proteasome subunit alpha type-4 [Dendrobium catenatum]	0.006	1.863	10	1	1	1	250		3.7
High	XP_020674905.1	40S ribosomal protein S26-2 [Dendrobium catenatum]	0	11.152	12	1	4	1	129	1157.36
High	XP_020674984.1	protein transport protein Sec24-like At3g07100 [Dendrobium catenatum]	0.004	2.1	1	1	1	1	1043	155.29
High	XP_020675189.1	AP-4 complex subunit mu isoform X1 [Dendrobium catenatum]	0.002	3.736	4	1	1	1	453	227.68
High	XP_020675233.1	sucrose-phosphate synthase [Dendrobium catenatum]	0.002	3.144	2	1	3	1	1078		6.79
High	XP_020675247.1	probable aspartyl aminopeptidase [Dendrobium catenatum]	0.002	5.245	2	1	6	1	485	1394.66
High	XP_020675331.2	leucine aminopeptidase 2, chloroplastic [Dendrobium catenatum]	0	7.206	6	2	10	1	528	2252.88	0
High	XP_020675372.2	mitochondrial import inner membrane translocase subunit Tim13 [Dendrobium catenatum]	0.002	4.021	11	1	9	1	93	1812.35
High	XP_020675548.1	pollen-specific protein C13 [Dendrobium catenatum]	0.003	2.335	9	1	2	1	167	297.83
High	XP_020675701.1	14-3-3-like protein [Dendrobium catenatum]	0	70.366	40	9	79	1	260	17072.5	119.55
High	XP_020675811.1	cell division cycle protein 48 homolog [Dendrobium catenatum]	0	79.494	20	16	44	1	811	8260.41	20.27
High	XP_020676236.1	ABC transporter G family member 39 [Dendrobium catenatum]	0.003	2.521	1	1	1	1	1445	167.21
High	XP_020676273.1	beta-glucosidase 2-like [Dendrobium catenatum]	0.002	3.869	3	2	22	1	529	3559.62
High	XP_020676322.1	cyclase-associated protein 1 [Dendrobium catenatum]	0.003	2.428	2	1	1	1	476	153.76
High	XP_020676376.1	mitochondrial dicarboxylate/tricarboxylate transporter DTC [Dendrobium catenatum]	0.002	4.089	7	2	4	1	299	617.76
High	XP_020676721.1	uncharacterized protein LOC110095497 [Dendrobium catenatum]	0.002	5.079	3	1	3	1	456	679.12
High	XP_020676764.2	uncharacterized protein LOC110095522 [Dendrobium catenatum]	0.002	3.854	2	1	6	1	455	1067.49
High	XP_020676832.1	plastidial pyruvate kinase 1, chloroplastic-like isoform X1 [Dendrobium catenatum]	0.002	4.33	2	1	5	1	575	1274.48
High	XP_020676907.1	arginase 1, mitochondrial [Dendrobium catenatum]	0.002	3.613	3	1	9	1	337	1986.91
High	XP_020677561.1	uncharacterized protein LOC110096129 [Dendrobium catenatum]	0.005	1.933	3	1	1	1	377	183.48
High	XP_020677581.1	peroxidase 51 [Dendrobium catenatum]	0.002	4.294	4	1	7	1	332	1641.63
High	XP_020677598.1	metacaspase-4 [Dendrobium catenatum]	0.003	2.554	4	1	2	1	429	295.51
High	XP_020677747.1	serine/arginine-rich splicing factor SR45a [Dendrobium catenatum]	0.003	2.555	4	1	2	1	238	287.33
High	XP_020677770.1	tubulin alpha chain [Dendrobium catenatum]	0	65.729	42	13	71	1	451	13558.7	32.07
High	XP_020677888.1	ABC transporter F family member 1 [Dendrobium catenatum]	0.003	2.53	2	1	2	1	600	347.72
High	XP_020678044.1	farnesyl diphosphate synthase 1 [Dendrobium catenatum]	0.002	3.376	4	1	4	1	348	605.88
High	XP_020678452.1	pirin-like protein [Dendrobium catenatum]	0	12.254	4	1	11	1	372	2762.19
High	XP_020678609.1	aconitate hydratase, cytoplasmic-like [Dendrobium catenatum]	0	13.328	7	4	26	1	499	5128.2
High	XP_020678666.1	protein BOBBER 1 [Dendrobium catenatum]	0.002	3.347	3	1	3	1	310	580.27
High	XP_020678683.1	DAZ-associated protein 1 isoform X1 [Dendrobium catenatum]	0	21.665	9	3	24	1	358	6845.34
High	XP_020678751.1	peroxidase P7 isoform X2 [Dendrobium catenatum]	0	11.242	11	2	9	1	459	2703.13
High	XP_020679123.2	phosphoribosylformylglycinamidine cyclo-ligase, chloroplastic/mitochondrial [Dendrobium catenatum]	0.004	2.038	4	1	2	1	389	280.76
High	XP_020679229.1	(S)-2-hydroxy-acid oxidase GLO1 [Dendrobium catenatum]	0	11.922	9	3	6	1	368	1233.89
High	XP_020679340.1	monothiol glutaredoxin-S10 isoform X1 [Dendrobium catenatum]	0.003	2.468	8	1	1	1	195	147.35
High	XP_020679477.1	peroxidase 51-like [Dendrobium catenatum]	0.002	2.622	5	1	1	1	334	180.81
High	XP_020679532.1	delta(24)-sterol reductase [Dendrobium catenatum]	0.002	2.914	2	1	1	1	560	237.88
High	XP_020679535.1	fasciclin-like arabinogalactan protein 1 [Dendrobium catenatum]	0.002	5.377	4	1	6	1	407	1268.73
High	XP_020679738.2	protein argonaute 1C-like [Dendrobium catenatum]	0	5.775	2	1	5	1	1078	1060.72
High	XP_020679870.1	annexin-like protein RJ4 [Dendrobium catenatum]	0.002	2.827	3	1	7	1	312	1359.26
High	XP_020679976.1	glutathione synthetase, chloroplastic [Dendrobium catenatum]	0.002	5.017	2	1	5	1	564	1313.55
High	XP_020680128.1	citrate synthase, glyoxysomal [Dendrobium catenatum]	0	36.876	16	7	38	1	513	9525.89
High	XP_020680148.1	probable 3-hydroxyisobutyrate dehydrogenase-like 1, mitochondrial [Dendrobium catenatum]	0.002	4.575	5	1	10	1	346	1671.52
High	XP_020680304.1	protein RETICULATA-RELATED 4, chloroplastic [Dendrobium catenatum]	0.002	4.466	3	1	3	1	382	666.82
High	XP_020680367.1	tubulin alpha-4 chain isoform X1 [Dendrobium catenatum]	0	73.591	45	14	83	1	451	16860.4	34.12
High	XP_020680814.1	THO complex subunit 4A [Dendrobium catenatum]	0.006	1.814	6	1	1	1	253	215.53		Acetyl [N-Term]
High	XP_020680865.1	mitochondrial import receptor subunit TOM6 homolog [Dendrobium catenatum]	0.002	2.976	15	1	8	1	54	1600.53		Acetyl [N-Term]
High	XP_020680896.1	26S proteasome regulatory subunit S10B homolog B [Dendrobium catenatum]	0	32.704	23	6	50	1	398	9519.17	25.31
High	XP_020680925.1	succinate-semialdehyde dehydrogenase, mitochondrial [Dendrobium catenatum]	0.003	2.328	2	1	4	1	522	658.92
High	XP_020680959.2	succinate dehydrogenase subunit 5, mitochondrial-like [Dendrobium catenatum]	0	8.207	7	1	8	1	218	2532.7
High	XP_020680992.1	alcohol dehydrogenase 1 [Dendrobium catenatum]	0	81.373	17	8	126	1	380	35129.5
High	XP_020681000.1	glucose-6-phosphate isomerase 1, chloroplastic-like [Dendrobium catenatum]	0.002	4.775	7	1	9	1	148	2138.89
High	XP_020681084.1	carbamoyl-phosphate synthase large chain, chloroplastic [Dendrobium catenatum]	0	6.531	2	1	8	1	1191		27.72
High	XP_020681318.1	protein RETICULATA-RELATED 3, chloroplastic [Dendrobium catenatum]	0.003	2.457	4	1	1	1	349	186.23
High	XP_020681319.1	cytochrome P450 714B3 [Dendrobium catenatum]	0.005	1.95	3	1	6	1	518	1066.29
High	XP_020681495.1	26S proteasome non-ATPase regulatory subunit 4 homolog [Dendrobium catenatum]	0.003	2.513	3	1	3	1	411	581.37
High	XP_020681723.1	serine/arginine-rich splicing factor RS31 isoform X1 [Dendrobium catenatum]	0	6.652	8	1	11	1	243	2499.17
High	XP_020682094.1	nudix hydrolase 3-like, partial [Dendrobium catenatum]	0.007	1.755	18	1	1	1	107	107.37
High	XP_020682158.1	ras-related protein RABB1c [Dendrobium catenatum]	0	13.745	30	4	8	1	211	1390.01
High	XP_020682214.1	T-complex protein 1 subunit theta [Dendrobium catenatum]	0	28.966	17	5	26	1	544	4489.29	30.5
High	XP_020682224.2	glycine-rich RNA-binding protein RZ1C-like isoform X1 [Dendrobium catenatum]	0.002	5.221	4	1	9	1	290	1858.91
High	XP_020682712.1	transmembrane protein 184C-like isoform X1 [Dendrobium catenatum]	0.002	3.197	5	1	2	1	308	390.14
High	XP_020682776.1	elicitor-responsive protein 3 [Dendrobium catenatum]	0	7.959	14	1	12	1	140	2251.8
High	XP_020682939.1	malate dehydrogenase [NADP], chloroplastic [Dendrobium catenatum]	0.002	3.027	3	1	1	1	443	189.27
High	XP_020683414.1	uncharacterized protein LOC110100310 [Dendrobium catenatum]	0.002	3.638	1	1	5	1	635	1034.04
High	XP_020683487.1	trifunctional UDP-glucose 4,6-dehydratase/UDP-4-keto-6-deoxy-D-glucose 3,5-epimerase/UDP-4-keto-L-rhamnose-reductase RHM1 [Dendrobium catenatum]	0.002	3.976	3	1	1	1	673	236.45
High	XP_020683597.1	nuclear cap-binding protein subunit 1 [Dendrobium catenatum]	0.004	2.23	1	1	1	1	700	201.15
High	XP_020683665.1	histone deacetylase HDT2 isoform X1 [Dendrobium catenatum]	0.002	3.376	3	1	3	1	320	520.51
High	XP_020683802.1	60S acidic ribosomal protein P1-like [Dendrobium catenatum]	0	7.197	11	1	12	1	115	3720.93
High	XP_020683805.1	transketolase, chloroplastic-like [Dendrobium catenatum]	0	10.229	4	3	11	1	744	2772.48
High	XP_020683851.1	serine hydroxymethyltransferase 4 [Dendrobium catenatum]	0	25.118	20	5	21	1	471	4917.19	4.59
High	XP_020683865.1	adenosylhomocysteinase [Dendrobium catenatum]	0	50.293	23	9	62	1	485	11438.1	38.75
High	XP_020684269.1	long chain base biosynthesis protein 1b [Dendrobium catenatum]	0.002	4.401	3	1	5	1	480	901.54
High	XP_020684679.1	probable carboxylesterase 2 [Dendrobium catenatum]	0.002	4.933	3	1	8	1	324	1869.93
High	XP_020685016.1	ribulose-phosphate 3-epimerase, cytoplasmic isoform isoform X1 [Dendrobium catenatum]	0.003	2.299	4	1	5	1	226	686.22
High	XP_020685142.1	sorbitol dehydrogenase [Dendrobium catenatum]	0	21.934	8	2	23	1	358	6174.73
High	XP_020685279.1	endo-1,3;1,4-beta-D-glucanase-like [Dendrobium catenatum]	0	14.431	8	1	22	1	238	5913.96
High	XP_020685383.1	histone deacetylase complex subunit SAP18 [Dendrobium catenatum]	0.002	4.471	8	1	1	1	153	268.9
High	XP_020685624.1	putative glucose-6-phosphate 1-epimerase [Dendrobium catenatum]	0.002	3.611	8	1	5	1	313		14.82
High	XP_020685799.1	isocitrate dehydrogenase [NAD] regulatory subunit 1, mitochondrial-like [Dendrobium catenatum]	0	8.97	10	3	6	1	375	1100.74
High	XP_020685831.1	DEAD-box ATP-dependent RNA helicase 52C isoform X1 [Dendrobium catenatum]	0	6.498	4	2	10	1	623	2034.58
High	XP_020685907.1	monothiol glutaredoxin-S15, mitochondrial [Dendrobium catenatum]	0.003	2.306	8	1	1	1	170	168.73
High	XP_020685960.1	H/ACA ribonucleoprotein complex subunit GAR1 [Dendrobium catenatum]	0.002	4.105	5	1	2	1	261	368.12
High	XP_020686176.2	cysteine proteinase inhibitor 12-like [Dendrobium catenatum]	0.002	3.041	4	1	8	1	234	1553.74
High	XP_020686270.1	probable inactive purple acid phosphatase 1 [Dendrobium catenatum]	0.002	4.678	2	1	1	1	613	247.52
High	XP_020686339.1	selenium-binding protein 2 isoform X1 [Dendrobium catenatum]	0	10.958	5	2	18	1	498	4148.4
High	XP_020686595.2	40S ribosomal protein S7 [Dendrobium catenatum]	0.002	2.859	6	1	2	1	192	485.16
High	XP_020686662.2	heterogeneous nuclear ribonucleoprotein Q isoform X1 [Dendrobium catenatum]	0.003	2.342	1	1	8	1	669	1444.72
High	XP_020687124.2	peroxidase 5-like [Dendrobium catenatum]	0	9.091	6	2	4	1	378	777.51
High	XP_020687733.1	peroxisomal (S)-2-hydroxy-acid oxidase GLO5 [Dendrobium catenatum]	0	6.874	7	2	3	1	367	658.32		Acetyl [N-Term]
High	XP_020687986.1	proteasome subunit alpha type-5 isoform X1 [Dendrobium catenatum]	0	13.195	11	3	19	1	242	3526.95
High	XP_020688107.1	peroxiredoxin-2F, mitochondrial isoform X1 [Dendrobium catenatum]	0	8.35	7	1	11	1	207	2067.45
High	XP_020688178.2	LOW QUALITY PROTEIN: transmembrane 9 superfamily member 11-like [Dendrobium catenatum]	0.002	4.206	3	1	2	1	655	523.41
High	XP_020688666.1	reactive Intermediate Deaminase A, chloroplastic [Dendrobium catenatum]	0	20.338	25	5	29	1	185	5931.55
High	XP_020688872.1	probable histone H2A variant 3 [Dendrobium catenatum]	0	8.443	22	2	7	1	176	1238.58	5.84
High	XP_020688949.1	coatomer subunit beta-1-like [Dendrobium catenatum]	0.003	2.7	2	1	1	1	951	169.82
High	XP_020688952.1	proteasome subunit beta type-6 [Dendrobium catenatum]	0	13.784	14	3	16	1	249	3390.79
High	XP_020689112.1	NAD-dependent malic enzyme 59 kDa isoform, mitochondrial isoform X1 [Dendrobium catenatum]	0.004	2.167	2	1	2	1	605	365.89
High	XP_020689138.1	translationally-controlled tumor protein homolog [Dendrobium catenatum]	0	10.974	20	1	7	1	168		49.25
High	XP_020689140.1	60S ribosomal protein L22-3 [Dendrobium catenatum]	0.002	3.626	11	1	2	1	129	278.96
High	XP_020689210.1	glucose-6-phosphate 1-dehydrogenase, cytoplasmic isoform isoform X1 [Dendrobium catenatum]	0	40.34	18	8	61	1	527	12711.4
High	XP_020689608.2	4-alpha-glucanotransferase DPE1, chloroplastic/amyloplastic [Dendrobium catenatum]	0.009	1.609	8	1	1	1	372		3.67
High	XP_020689728.1	serine/threonine-protein kinase SAPK7 [Dendrobium catenatum]	0.006	1.867	4	1	1	1	361	119.81
High	XP_020690066.2	nucleolar protein 56-like [Dendrobium catenatum]	0.002	4.202	2	1	2	1	559	394.68
High	XP_020690374.1	nucleosome assembly protein 1;1 isoform X1 [Dendrobium catenatum]	0	11.037	8	2	22	1	373	4012.01
High	XP_020690761.1	flowering locus K homology domain isoform X1 [Dendrobium catenatum]	0.005	1.939	3	1	4	1	439	620.53
High	XP_020690789.1	60S ribosomal protein L32-1 [Dendrobium catenatum]	0	22.585	23	3	25	1	133	5816.23
High	XP_020690878.1	probable lactoylglutathione lyase, chloroplastic [Dendrobium catenatum]	0.002	4.949	8	1	1	1	351		5.22
High	XP_020690900.2	putative G3BP-like protein [Dendrobium catenatum]	0.003	2.527	2	1	1	1	453	184.64
High	XP_020690934.1	isoamylase 3, chloroplastic-like [Dendrobium catenatum]	0	7.287	15	1	10	1	103	2994.5
High	XP_020691000.1	probable V-type proton ATPase subunit H isoform X1 [Dendrobium catenatum]	0	6.214	4	1	2	1	454	401.12
High	XP_020691067.1	uridine kinase-like protein 1, chloroplastic [Dendrobium catenatum]	0.002	3.322	2	1	6	1	495	1282.59
High	XP_020691282.1	LRR receptor-like serine/threonine-protein kinase GSO2 [Dendrobium catenatum]	0	6.161	1	1	15	1	709	2693.94
High	XP_020691610.1	mitogen-activated protein kinase 2 [Dendrobium catenatum]	0.002	3.563	5	1	3	1	374	385.13	0
High	XP_020691637.1	mitochondrial-processing peptidase subunit alpha isoform X1 [Dendrobium catenatum]	0	8.52	7	3	12	1	508	2324.99
High	XP_020692029.1	26S proteasome non-ATPase regulatory subunit 1 homolog A [Dendrobium catenatum]	0.003	2.373	1	1	5	1	1000	685.53
High	XP_020692433.1	probable small nuclear ribonucleoprotein G [Dendrobium catenatum]	0.002	5.093	19	1	6	1	80	1355.88
High	XP_020692464.1	transketolase, chloroplastic [Dendrobium catenatum]	0	12.683	6	4	18	1	744	2511.66	17.48
High	XP_020692996.1	cysteine desulfurase, mitochondrial [Dendrobium catenatum]	0.003	2.686	3	1	1	1	467	167.52
High	XP_020693235.1	cationic peroxidase 1 [Dendrobium catenatum]	0	10.543	13	2	12	1	314	1257.42	17.47
High	XP_020693328.1	uncharacterized protein LOC110107407 isoform X1 [Dendrobium catenatum]	0.004	2.111	16	1	1	1	234		3.59
High	XP_020693390.1	cationic peroxidase SPC4 [Dendrobium catenatum]	0.002	4.177	3	1	10	1	348	2476.93
High	XP_020693504.1	ABC transporter C family member 4 [Dendrobium catenatum]	0.004	2.217	1	1	1	1	1535	215.36
High	XP_020693582.1	NADH dehydrogenase [ubiquinone] 1 alpha subcomplex subunit 13-B [Dendrobium catenatum]	0.007	1.75	10	1	3	1	143	394.08
High	XP_020693701.1	acetylornithine deacetylase isoform X1 [Dendrobium catenatum]	0.003	2.279	3	1	1	1	441	178.32
High	XP_020693789.1	importin beta-like SAD2 [Dendrobium catenatum]	0.002	3.17	1	1	2	1	1030	384.94
High	XP_020693810.1	protein mago nashi homolog 2 [Dendrobium catenatum]	0.002	3.6	11	1	1	1	152	191.36
High	XP_020694024.1	clathrin heavy chain 1 [Dendrobium catenatum]	0	54.196	13	14	65	1	1706	10241.5	46.34
High	XP_020694100.1	histone H3.2 [Dendrobium catenatum]	0	10.188	32	3	16	1	136	2713.67	4.08
High	XP_020694151.1	probable linoleate 9S-lipoxygenase 5 [Dendrobium catenatum]	0	7.697	2	2	14	1	862	1896.97
High	XP_020694708.1	heat shock cognate 70 kDa protein 2 [Dendrobium catenatum]	0	224.219	53	30	295	1	647	64318.2	245.26	Met-loss+Acetyl [N-Term]
High	XP_020694759.1	sedoheptulose-1,7-bisphosphatase, chloroplastic [Dendrobium catenatum]	0	15.561	11	3	6	1	391	1467.02
High	XP_020694943.1	ATP-dependent Clp protease proteolytic subunit-related protein 1, chloroplastic [Dendrobium catenatum]	0.002	4.17	3	1	4	1	397	769.94
High	XP_020694967.1	thioredoxin Y, chloroplastic [Dendrobium catenatum]	0.006	1.884	8	1	2	1	168	282.89
High	XP_020695026.2	ricin B-like lectin R40C1 [Dendrobium catenatum]	0	15.408	13	3	13	1	214	2372.86
High	XP_020695112.1	2-Cys peroxiredoxin BAS1, chloroplastic [Dendrobium catenatum]	0	11.997	9	1	23	1	269		89.75
High	XP_020695539.1	60S ribosomal protein L18-2 isoform X1 [Dendrobium catenatum]	0	21.625	32	7	31	1	187	3856.61	15.29
High	XP_020695743.1	pyruvate decarboxylase 1 [Dendrobium catenatum]	0	21.982	6	2	15	1	600	4153.27
High	XP_020696227.1	beta-glucosidase 22 [Dendrobium catenatum]	0.002	4.752	4	2	22	1	509	3578.89
High	XP_020696297.2	ribose-phosphate pyrophosphokinase 4 [Dendrobium catenatum]	0	6.84	5	1	4	1	367	801.09
High	XP_020696326.1	stromal 70 kDa heat shock-related protein, chloroplastic [Dendrobium catenatum]	0	35.226	12	7	56	1	701	13140.9
High	XP_020696333.2	uncharacterized protein LOC110109558 [Dendrobium catenatum]	0.002	4.302	5	1	4	1	288	867.95
High	XP_020696568.1	protein transport protein SEC31 homolog B [Dendrobium catenatum]	0.004	2.025	1	1	1	1	1130	138.65
High	XP_020696779.2	probable gamma-aminobutyrate transaminase 3, mitochondrial isoform X1 [Dendrobium catenatum]	0.002	2.946	3	1	8	1	529	1332.27
High	XP_020696927.1	nitrile-specifier protein 5 [Dendrobium catenatum]	0.002	3.405	3	1	7	1	323	1331.64
High	XP_020697143.1	xyloglucan endotransglucosylase/hydrolase protein 24-like [Dendrobium catenatum]	0	9.022	7	1	6	1	286	1581.04
High	XP_020697256.1	malate synthase, glyoxysomal [Dendrobium catenatum]	0.002	5.042	3	2	7	1	559	1269.18
High	XP_020697257.1	uncharacterized protein LOC110110219 [Dendrobium catenatum]	0.004	2.137	2	1	1	1	520	170.71
High	XP_020697321.1	transmembrane 9 superfamily member 7 [Dendrobium catenatum]	0	6.767	3	1	2	1	654	735.92
High	XP_020697431.1	PLAT domain-containing protein 3 [Dendrobium catenatum]	0.005	1.946	5	1	8	1	198	1476.04
High	XP_020697481.1	uncharacterized protein LOC110110380 isoform X1 [Dendrobium catenatum]	0	6.834	4	1	6	1	333	1654.86
High	XP_020697582.1	la protein 1 [Dendrobium catenatum]	0.002	4.448	3	1	4	1	462	869.86
High	XP_020697588.1	outer envelope pore protein 16-2, chloroplastic [Dendrobium catenatum]	0	6.751	7	1	10	1	176	2819.71
High	XP_020697619.1	flowering locus K homology domain-like [Dendrobium catenatum]	0.002	3.537	3	1	3	1	444	564.38
High	XP_020697858.1	FAM10 family protein At4g22670 [Dendrobium catenatum]	0.006	1.845	2	1	2	1	392	333.52
High	XP_020697987.1	uncharacterized protein LOC110110726 [Dendrobium catenatum]	0.003	2.526	3	1	4	1	364	664.18
High	XP_020698046.1	beta-galactosidase 6 [Dendrobium catenatum]	0.002	4.652	1	1	3	1	861	569.91
High	XP_020698181.2	elongation factor 1-delta-like [Dendrobium catenatum]	0	11.069	8	2	21	1	235	3924.32
High	XP_020698572.1	enoyl-[acyl-carrier-protein] reductase [NADH] 1, chloroplastic [Dendrobium catenatum]	0	15.719	10	3	18	1	381	4424.07
High	XP_020698825.1	uncharacterized oxidoreductase At4g09670-like [Dendrobium catenatum]	0.002	4.952	6	1	7	1	359	1439.95
High	XP_020699123.1	apoptosis-inducing factor homolog B [Dendrobium catenatum]	0	9.277	12	2	17	1	361	2658.34	17.58
High	XP_020699176.1	probable xyloglucan endotransglucosylase/hydrolase protein 23 [Dendrobium catenatum]	0.005	1.924	6	1	1	1	287	145.87
High	XP_020699203.1	uncharacterized protein LOC110111603 [Dendrobium catenatum]	0.007	1.761	4	1	6	1	189	906.89
High	XP_020699342.2	pyrophosphate--fructose 6-phosphate 1-phosphotransferase subunit beta 1 [Dendrobium catenatum]	0.002	5.374	3	1	6	1	404	1325.27
High	XP_020699467.1	chaperone protein ClpC1, chloroplastic [Dendrobium catenatum]	0	50.986	21	13	66	1	919	9863.47	39.82
High	XP_020699533.1	elongation factor Tu, mitochondrial [Dendrobium catenatum]	0	30.531	33	8	29	1	454	4829.03	11.29
High	XP_020699837.1	glycine--tRNA ligase, mitochondrial 1 [Dendrobium catenatum]	0	17.18	6	3	20	1	725	4353.26
High	XP_020700074.1	polyadenylate-binding protein 2 [Dendrobium catenatum]	0	9.722	4	2	11	1	658	2723.84
High	XP_020700135.1	urease accessory protein G [Dendrobium catenatum]	0	16.506	15	3	13	1	275	3126.68
High	XP_020700308.1	uncharacterized protein LOC110112431 [Dendrobium catenatum]	0.002	2.811	3	1	2	1	322	353.36
High	XP_020700330.1	asparagine--tRNA ligase, cytoplasmic 3 [Dendrobium catenatum]	0.004	2.148	3	1	2	1	564	235.03
High	XP_020700422.1	DEAD-box ATP-dependent RNA helicase 9, mitochondrial [Dendrobium catenatum]	0.002	4.424	2	1	4	1	677	817.22
High	XP_020700561.2	annexin D2 [Dendrobium catenatum]	0.002	3.547	3	1	7	1	316	995.74
High	XP_020700719.1	polyadenylate-binding protein 2-like [Dendrobium catenatum]	0	5.49	4	2	6	1	655	1053.31
High	XP_020700722.1	long chain acyl-CoA synthetase 6, peroxisomal isoform X1 [Dendrobium catenatum]	0.002	2.874	3	1	1	1	698	173.82
High	XP_020700853.1	glycerate dehydrogenase [Dendrobium catenatum]	0	5.889	4	1	1	1	386	237.24
High	XP_020701065.1	uncharacterized protein LOC110113001 isoform X1 [Dendrobium catenatum]	0.002	3.326	6	1	4	1	183	661.24
High	XP_020701297.1	uncharacterized protein LOC110113180 [Dendrobium catenatum]	0.007	1.749	4	1	2	1	314	317.22
High	XP_020701443.1	glycine cleavage system H protein 2, mitochondrial [Dendrobium catenatum]	0.002	5.425	19	1	8	1	151		23.78
High	XP_020701518.1	leucine-rich repeat extensin-like protein 3 [Dendrobium catenatum]	0.002	3.58	1	1	3	1	797	557.64
High	XP_020701542.1	oryzain alpha chain [Dendrobium catenatum]	0.002	3.668	3	1	6	1	477	1176.24
High	XP_020701692.1	flavonol 3-O-glucosyltransferase UGT89B1 [Dendrobium catenatum]	0.002	2.914	2	1	9	1	474	2078.54
High	XP_020701778.2	pyruvate kinase, cytosolic isozyme-like [Dendrobium catenatum]	0.002	3.843	4	2	2	1	496	335.59
High	XP_020701934.1	40S ribosomal protein Sa-2-like [Dendrobium catenatum]	0	17.144	13	3	26	1	301	6723.68
High	XP_020702035.1	uncharacterized protein LOC110113701 isoform X1 [Dendrobium catenatum]	0.002	5.147	7	1	5	1	266	1091.11
High	XP_020702251.1	IAA-amino acid hydrolase ILR1-like 1 [Dendrobium catenatum]	0.002	4.847	4	1	1	1	446	253.81
High	XP_020702280.1	phenylalanine ammonia-lyase [Dendrobium catenatum]	0.004	2.123	2	1	2	1	713	231.69
High	XP_020702419.2	uncharacterized protein LOC110114011 [Dendrobium catenatum]	0.004	2.145	3	1	1	1	408	137.04
High	XP_020702513.1	UDP-glucose 6-dehydrogenase 4-like [Dendrobium catenatum]	0	28.401	20	8	33	1	480	6573.82	0
High	XP_020702551.1	uncharacterized protein LOC110114124 isoform X1 [Dendrobium catenatum]	0.002	4.297	4	1	10	1	451	2318.01
High	XP_020702658.1	protein SRC2 [Dendrobium catenatum]	0.002	2.798	5	1	3	1	319	532.12
High	XP_020702721.1	ribose-phosphate pyrophosphokinase 1 [Dendrobium catenatum]	0.006	1.859	3	1	1	1	404	137.34
High	XP_020702840.1	3-isopropylmalate dehydratase large subunit, chloroplastic [Dendrobium catenatum]	0	9.295	8	3	9	1	510	1640.75
High	XP_020703021.1	serine hydroxymethyltransferase, mitochondrial isoform X1 [Dendrobium catenatum]	0	9.588	12	3	12	1	520	869.33	25.78
High	XP_020703071.1	proteasome subunit beta type-7-A [Dendrobium catenatum]	0.004	2.193	3	1	1	1	273	193.21
High	XP_020703194.1	2-hydroxyacyl-CoA lyase [Dendrobium catenatum]	0.002	4.406	3	1	8	1	476	1588.21
High	XP_020703200.2	peroxidase 40 [Dendrobium catenatum]	0.003	2.236	3	1	2	1	270	388.58
High	XP_020703547.1	phospho-2-dehydro-3-deoxyheptonate aldolase 1, chloroplastic [Dendrobium catenatum]	0	19.664	12	5	10	1	539	2168.04
High	XP_020703567.1	guanine nucleotide-binding protein subunit beta-like protein A [Dendrobium catenatum]	0	18.228	17	4	20	1	323	4456.61
High	XP_020703632.2	2-C-methyl-D-erythritol 2,4-cyclodiphosphate synthase, chloroplastic [Dendrobium catenatum]	0.003	2.373	4	1	3	1	305	459.35
High	XP_020703842.1	late embryogenesis abundant protein Lea14-A [Dendrobium catenatum]	0.002	3.032	7	1	10	1	159	2080.12
High	XP_020704098.1	bibenzyl synthase [Dendrobium catenatum]	0	9.357	8	3	12	1	390	2846.9
High	XP_020704915.1	acetate/butyrate--CoA ligase AAE7, peroxisomal [Dendrobium catenatum]	0.002	3.519	3	1	1	1	573	190.96
High	XP_020705066.1	myosin-11 [Dendrobium catenatum]	0.002	4.301	1	1	2	1	1352	437.3
High	XP_020705209.2	phosphoserine aminotransferase 2, chloroplastic-like [Dendrobium catenatum]	0	5.493	7	2	9	1	397	1395.48
High	XP_020705320.1	coatomer subunit epsilon-1-like [Dendrobium catenatum]	0.006	1.804	3	1	1	1	289	128.45
High	XP_020705558.1	DNA-binding protein HEXBP [Dendrobium catenatum]	0.004	2.074	5	1	1	1	238	163.72
High	XP_020705812.1	copper transport protein ATX1 [Dendrobium catenatum]	0.002	4.284	16	1	10	1	86	1647.95
High	XP_020705889.1	uncharacterized protein OsI_027940 isoform X1 [Dendrobium catenatum]	0	5.848	6	1	9	1	174	1876.89
High	XP_028547536.1	late embryogenesis abundant protein 1 [Dendrobium catenatum]	0.004	2.035	4	1	1	1	300	201.71
High	XP_028548028.1	LOW QUALITY PROTEIN: aquaporin PIP2-7 [Dendrobium catenatum]	0	6.368	12	1	2	1	290		13.12
High	XP_028548050.1	phosphoenolpyruvate carboxykinase (ATP) [Dendrobium catenatum]	0	18.152	8	4	15	1	686	2651.36
High	XP_028548817.1	diphosphomevalonate decarboxylase MVD2, peroxisomal isoform X1 [Dendrobium catenatum]	0.005	1.969	2	1	3	1	498	463.81
[truncated: 3,402 more rows]

## Sheet: Supplementary Table S2c
Supplementary Table S2. Results of proteome profiling. Supplementary table to Figure 2, 3, 6, and 7.
[truncated: 1,500 more rows]

[truncated: 2 more sheets: Supplementary Table S3, Supplementary Table S4]
